# Supplementary material for: The genetic landscape for amyloid beta fibril nucleation accurately discriminates familial Alzheimer’s disease mutations
Source: eLife journal article supplement (doi:10.7554/elife.63364), 2021-02-01
Supplement: supp [file elife-63364-supp-v1.zip]

Archive with 14 entries (14 files):
- elife_poa_e63364_Supplementary_file_1.xlsx
- elife_poa_e63364_Supplementary_file_2.xlsx
- elife_poa_e63364_Supplementary_file_3.xlsx
- elife_poa_e63364_Supplementary_file_4.xlsx
- elife_poa_e63364_Figure_1_figure_supplement_1.pdf
- elife_poa_e63364_Figure_2_figure_supplement_1.pdf
- elife_poa_e63364_Figure_3_figure_supplement_1.pdf
- elife_poa_e63364_Figure_3_figure_supplement_2.pdf
- elife_poa_e63364_Figure_4_figure_supplement_1.pdf
- elife_poa_e63364_Figure_5_figure_supplement_1.pdf
- elife_poa_e63364_Figure_5_figure_supplement_2.pdf
- elife_poa_e63364_Figure_1_figure_supplement_1_source_data_1.xlsx
- elife_poa_e63364_Figure_3_figure_supplement_1_source_data_1.xlsx
- elife_poa_e63364_Transparent_Reporting_File.docx
