# Supplementary material for: The genetic landscape for amyloid beta fibril nucleation accurately discriminates familial Alzheimer’s disease mutations
Source: eLife journal article supplement (doi:10.7554/elife.63364), 2021-02-01
Supplement: supp [file elife-63364-supp-v1.zip › elife_poa_e63364_Figure_1_figure_supplement_1_source_data_1.xlsx]

## Sheet: Hoja1
variant_replicate	count colonies -URA	plating dilution	dilution colonies -URA	count colonies -ADE-URA	plating dilution	dilution colonies -ADE-URA	% -ADE-URA/-URA
supN_rep1	510	1:20000	10200000	6	1:1	6	5.88235e-05
supN_rep2	296	1:20000	5920000	0	1:1	0	0
supN_rep3	448	1:20000	8960000	12	1:1	12	0.000133929
supN-AB_rep1	436	1:20000	8760000	1190	1:1000	1190000	13.5845
supN-AB_rep2	375	1:20000	7500000	723	1:1000	723000	9.64
supN-AB_rep3	332	1:20000	6640000	712	1:1000	712000	10.7229
AB_rep1	388	1:20000	7760000	14	1:1	14	0.000180412
AB_rep2	364	1:20000	7230000	0	1:1	0	0
AB_rep3	432	1:20000	8640000	6	1:1	6	6.94444e-05
