# Supplementary material for: The genetic landscape for amyloid beta fibril nucleation accurately discriminates familial Alzheimer’s disease mutations
Source: eLife journal article supplement (doi:10.7554/elife.63364), 2021-02-01
Supplement: supp [file elife-63364-supp-v1.zip › elife_poa_e63364_Figure_3_figure_supplement_1_source_data_1.xlsx]

## Sheet: Hoja1
variant_replicate	count colonies -URA	plating dilution	dilution colonies -URA	count colonies -ADE-URA	plating dilution	dilution colonies -ADE-URA	% -ADE-URA/-URA
supN_rep1	720	1:10000	7200000	33	1:1	33	0.000458333
supN_rep2	753	1:10000	7530000	25	1:1	25	0.000332005
supN_rep3	552	1:10000	5520000	1	1:1	1	1.81159e-05
supN-AB_rep1	732	1:10000	7320000	704	1:1000	704000	9.61749
supN-AB_rep2	962	1:10000	9620000	535	1:1000	535000	5.56133
supN-AB_rep3	716	1:10000	7160000	539	1:1000	539000	7.52793
supN-AB(22-42)_rep1	588	1:10000	5880000	1594	1:200	318800	5.42177
supN-AB(22-42)_rep2	912	1:10000	9120000	1696	1:200	339200	3.7193
supN-AB(22-42)_rep3	535	1:10000	5350000	1808	1:200	361600	6.75888
supN-AB(24-42)_rep1	785	1:10000	7850000	869	1:2000	1738000	22.1401
supN-AB(24-42)_rep2	695	1:10000	6950000	890	1:2000	1780000	25.6115
supN-AB(24-42)_rep3	591	1:10000	5910000	714	1:2000	1428000	24.1624
supN-AB(27-42)_rep1	918	1:10000	9180000	745	1:2000	1490000	16.2309
supN-AB(27-42)_rep2	884	1:10000	8840000	929	1:2000	1858000	21.0181
supN-AB(27-42)_rep3	693	1:10000	6930000	573	1:2000	1146000	16.5368
