# Supplementary material for: The genetic landscape for amyloid beta fibril nucleation accurately discriminates familial Alzheimer’s disease mutations
Source: eLife journal article supplement (doi:10.7554/elife.63364), 2021-02-01
Supplement: supp [file elife-63364-supp-v1.zip › elife_poa_e63364_Supplementary_file_1.xlsx]

## Sheet: in_vitro_kinetics
				Aβ42
Aβ variant	fAD class	Nucleation score	category FDR10	Yang et al., 2018 (https://www.pnas.org/content/pnas/115/26/E5849.full.pdf)	Thacker et al., 2020 (https://www-pnas-org.sire.ub.edu/content/pnas/117/41/25272.full.pdf)	Bolognesi et al., 2014 (https://pubs-acs-org.sire.ub.edu/doi/pdf/10.1021/cb400616y)	Hori et al., 2006 (https://www.jbc.org/content/282/7/4916.long)	Meisl et al., 2016 (https://www.nature.com/articles/srep18728)	Chen et al., 2012 (https://journals.plos.org/plosone/article?id=10.1371/journal.pone.0035807)	Zhou et al., 2011 (https://www.ncbi.nlm.nih.gov/pmc/articles/PMC3377078/)	Benilova et al., 2014 (https://pubmed.ncbi.nlm.nih.gov/25253695)	Morimoto et al., 2004 (https://www.jbc.org/content/279/50/52781.long)	Murray et al., 2016 (https://onlinelibrary.wiley.com/doi/epdf/10.1002/prot.24995)	Thu et al., 2019 (https://aip.scitation.org/doi/full/10.1063/1.5096379)	Agreement
A2T		-0.0857239	WT-like NS								Similar aggregation rate		Decreased/similar aggregation rate		v
A2V	Recessive	-1.18909	Decreasing NS					Decreased aggregation rate			Similar aggregation rate		Decreased aggregation rate		v
H6R	Dominant	0.202578	Increasing NS				Increased aggregation rate								v
D7H	Dominant	0.48539	Increasing NS						Decreased aggregation rate						x
D7N	Dominant	0.312035	Increasing NS				Increased aggregation rate								v
E11K	Dominant	0.206253	Increasing NS							Increased aggregation rate					v
A21G	Dominant	0.222788	Increasing NS	Similar aggregation rate										-0.671	x
A21S		-0.601038	Decreasing NS		Decreased aggregation rate										v
E22G	Dominant	2.46424	Increasing NS	Increased aggregation rate		Increased aggregation rate	Increased aggregation rate							0.209	v
E22K	Dominant	0.618817	Increasing NS	Increased aggregation rate										0.545	v
E22Q	Dominant	1.80983	Increasing NS	Increased aggregation rate											v
D23N	Dominant	1.11223	Increasing NS	Increased aggregation rate										0.238	v
V40S		-2.87	Decreasing NS		Decreased aggregation rate										v
I41K		-2.97307	Decreasing NS											-0.518	v
A42S		-0.106111	WT-like NS		Similar aggregation rate										v
A42T	Dominant	0.592277	Increasing NS									Increased aggregation rate			v
