# Supplementary material for: The genetic landscape for amyloid beta fibril nucleation accurately discriminates familial Alzheimer’s disease mutations
Source: eLife journal article supplement (doi:10.7554/elife.63364), 2021-02-01
Supplement: supp [file elife-63364-supp-v1.zip › elife_poa_e63364_Supplementary_file_2.xlsx]

## Sheet: Hoja1
Supplementary file 2. Candidate fAD variants
ID (WT AA, position, mutant AA)	Nucleation score
D1E	0.103777
D1G	0.456478
D1H	0.219606
D1N	0.438798
E3A	0.280262
E3G	0.45521
E3K	0.6365
E3Q	0.234276
D7A	0.255589
D7G	0.379841
D7Y	0.184352
G9R	0.42398
Y10H	0.155912
E11A	0.313811
E11D	0.439718
E11G	0.706469
E11Q	0.604567
E11V	0.335145
V12A	0.162633
V12G	0.263063
H13I	0.871559
H13N	0.835579
H13P	0.776746
H13Y	0.762199
H14I	1.24
H14N	0.163536
H14P	0.663711
Q15H	0.453024
Q15L	0.148219
Q15P	1.32326
K16T	0.987169
L17F	0.828942
L17I	1.14053
L17M	0.283614
L17V	1.0508
L17W	0.400185
F19I	1.05333
F19V	0.455723
F20I	0.815404
A21V	0.637275
E22A	1.22618
E22K	0.618817
E22N	1.78044
D23E	0.717991
D23G	0.988906
V24G	0.699975
V24M	0.327277
G25S	0.182539
N27F	0.683181
N27I	0.427831
N27Y	0.553646
G29V	0.873224
A30I	1.64858
A30T	1.15197
A30V	1.75284
L34I	1.18633
V36L	0.721993
V36M	0.145149
V39I	0.197845
I41F	0.70877
A42L	1.06863
A42M	0.677558
A42V	0.547735
