# Supplementary material for: The genetic landscape for amyloid beta fibril nucleation accurately discriminates familial Alzheimer’s disease mutations
Source: eLife journal article supplement (doi:10.7554/elife.63364), 2021-02-01
Supplement: supp [file elife-63364-supp-v1.zip › elife_poa_e63364_Supplementary_file_4.xlsx]

## Sheet: Title and headers
Supplementary file 4. Nucleation scores and associated error estimates, merged and for each independent replicate
Headers	Description
Pos	aa position
WT_AA	WT aa residue
Mut	Mutated aa residue
Pos2	aa position of mutation 2 in double mutant
Mut2	Mutated aa residue of mutation 2 in double mutant
Pos1	aa position of mutation 1 in double mutant
Mut1	Mutated aa residue of mutation 1 in double mutant
WT_AA1	WT aa residue of mutation 1 in double mutant
WT_AA2	WT aa residue of mutation 2 in double mutant
Nmut_nt	Number of nt changes involved
Nmut_aa	Number of aa changes involved
Nmut_codons	Number of codon changes involved
STOP	Mutations causing introduction of stop codons
mean_count	Mean read counts of the input replicates
nscore[1,2,3]	Nucleation score for [1,2,3] replicates
sigma[1,2,3]	Error over nucleation score for [1,2,3] replicates
nscore	Merged nucleation score
sigma	Merged error over nucletion score

## Sheet: 1 aa change
Pos	WT_AA	Mut	Nham_nt	Nham_aa	Nmut_codons	STOP	mean_count	nscore1	sigma1	nscore2	sigma2	nscore3	sigma3	nscore	sigma
1	D	K	2	1	1	FALSE	210.5	-0.280176	0.48282	0.175372	0.647374	NA	NA	-0.117352	0.387033
1	D	N	2	1	1	FALSE	28544	0.38848	0.112041	0.306589	0.077314	0.785219	0.299795	0.3525	0.0622474
1	D	T	2	1	1	FALSE	97	NA	NA	-2.81801	1.06814	NA	NA	-2.81801	1.06814
1	D	S	2	1	1	FALSE	150.667	0.00340646	0.52567	0.180478	0.622756	0.448936	1.08637	0.121805	0.376764
1	D	I	2	1	1	FALSE	334.333	-2.36475	0.373224	-2.57915	0.482386	-2.07493	0.839842	-2.40434	0.278486
1	D	H	1	1	1	FALSE	4215.67	0.0638527	0.139924	0.101746	0.142249	0.838435	0.371569	0.133308	0.0963415
1	D	E	1	1	1	FALSE	46007	0.0130364	0.0863046	-0.00543187	0.0630383	0.360046	0.232047	0.0174793	0.0497227
2	A	K	2	1	1	FALSE	96	NA	NA	-0.773028	0.963621	NA	NA	-0.773028	0.963621
2	A	T	1	1	1	FALSE	17564.7	-0.147683	0.109722	-0.2207	0.0852798	0.201697	0.282837	-0.172021	0.0655029
2	A	I	2	1	1	FALSE	161.5	-2.87072	0.589209	-2.30926	0.881275	NA	NA	-2.69727	0.489817
2	A	P	1	1	1	FALSE	6138.33	-0.19539	0.130948	-0.109792	0.120342	0.138897	0.346813	-0.131345	0.0858496
2	A	E	1	1	1	FALSE	13132.3	-0.703262	0.119402	-0.673285	0.0932672	-0.43944	0.327163	-0.672862	0.071714
2	A	D	2	1	1	FALSE	296.667	-0.31641	0.357612	-0.271072	0.494252	NA	NA	-0.30083	0.289727
3	E	K	1	1	1	FALSE	9721.67	0.365954	0.124484	0.684034	0.104196	0.502404	0.330671	0.550203	0.0776652
3	E	N	2	1	1	FALSE	58	NA	NA	0.481785	1.22253	NA	NA	0.481785	1.22253
3	E	T	2	1	1	FALSE	71	-2.66922	0.934714	NA	NA	NA	NA	-2.66922	0.934714
3	E	M	2	1	1	FALSE	126.667	0.851095	0.555103	-0.476954	0.789409	-0.459198	0.869063	0.224923	0.402454
3	E	Q	1	1	1	FALSE	2241.67	0.344499	0.172443	-0.0737222	0.192967	0.0619945	0.36237	0.147978	0.121179
3	E	D	1	1	1	FALSE	11394	-0.138819	0.0959867	-0.100334	0.0881087	0.208449	0.245369	-0.0965864	0.0627505
4	F	N	2	1	1	FALSE	108.667	-0.133758	0.691996	-1.02702	0.731177	-0.527163	1.02825	-0.55029	0.451542
4	F	T	2	1	1	FALSE	146	-0.816753	0.455533	0.385416	0.821461	-0.630283	0.976598	-0.547749	0.368869
4	F	I	2	1	1	FALSE	22715.7	-0.38642	0.113729	-0.432938	0.0818724	-0.272081	0.304016	-0.41045	0.0649135
4	F	H	2	1	1	FALSE	116	-0.982735	0.580088	-0.465865	0.827876	-0.870743	0.940406	-0.824367	0.424035
4	F	P	2	1	1	FALSE	155	-0.556931	0.579869	-0.48939	0.735026	NA	NA	-0.531021	0.455254
4	F	L	2	1	1	FALSE	46091.3	-0.627268	0.0724894	-0.664554	0.0557678	NA	NA	-0.650691	0.0442009
4	F	V	1	1	1	FALSE	2974.67	-0.349441	0.154076	-0.38558	0.167305	-0.229336	0.370287	-0.354316	0.108374
4	F	*	2	1	1	TRUE	70	NA	NA	-1.18265	1.13813	NA	NA	-1.18265	1.13813
4	F	Y	1	1	1	FALSE	33300.7	-0.165246	0.112461	-0.145908	0.076302	-0.0632696	0.296307	-0.148149	0.0617544
4	F	S	2	1	1	FALSE	33354.3	-0.509533	0.108905	-0.412018	0.0754241	-0.319507	0.276262	-0.437676	0.0605004
4	F	C	1	1	1	FALSE	2966.67	-0.329089	0.156611	-0.520183	0.169796	-0.919922	0.359242	-0.463771	0.109629
5	R	K	2	1	1	FALSE	85	-0.235276	0.689604	0.674315	1.12008	NA	NA	0.0147409	0.587231
5	R	T	2	1	1	FALSE	89	NA	NA	-3.32277	1.1935	NA	NA	-3.32277	1.1935
5	R	S	2	1	1	FALSE	310	-1.74569	0.435715	-0.739688	0.519502	NA	NA	-1.33026	0.33384
5	R	I	2	1	1	FALSE	134.667	-0.898717	0.522962	-0.745737	0.727044	-0.843047	1.08513	-0.846089	0.395361
5	R	Q	1	1	1	FALSE	18911.3	-0.602514	0.115155	-0.486458	0.0843688	-0.287387	0.308186	-0.515854	0.0664563
5	R	H	2	1	1	FALSE	295	0.273792	0.455844	-1.25369	0.507464	NA	NA	-0.40833	0.339116
5	R	P	1	1	1	FALSE	4297.33	-0.695972	0.139601	-0.471629	0.13825	-0.323123	0.361075	-0.56482	0.0947865
6	H	K	2	1	1	FALSE	72	-1.99006	0.868307	NA	NA	NA	NA	-1.99006	0.868307
6	H	N	2	1	1	FALSE	5249	-0.222541	0.135116	NA	NA	NA	NA	-0.222541	0.135116
6	H	S	2	1	1	FALSE	53	-0.531003	0.950992	NA	NA	NA	NA	-0.531003	0.950992
6	H	I	2	1	1	FALSE	74	-0.370147	0.711992	-1.22314	1.30896	NA	NA	-0.564898	0.625454
6	H	Q	1	1	1	FALSE	36376.3	-0.261954	0.088929	-0.288619	0.0663273	0.251248	0.239541	-0.254188	0.0519045
7	D	N	1	1	1	FALSE	10700.7	0.193695	0.123668	0.215424	0.0989625	0.571484	0.331392	0.225738	0.0752498
7	D	S	2	1	1	FALSE	68.5	-0.56294	0.818363	1.38936	1.15131	NA	NA	0.0923659	0.667024
7	D	I	2	1	1	FALSE	107	-0.857827	0.56546	-0.516793	1.23364	NA	NA	-0.798616	0.514033
7	D	H	1	1	1	FALSE	2336.33	0.439838	0.164718	0.26326	0.180012	0.811026	0.39132	0.399093	0.116054
7	D	E	1	1	1	FALSE	14871.7	-0.14136	0.0916961	-0.031153	0.0809163	0.166891	0.241802	-0.0648132	0.0588473
8	S	K	2	1	1	FALSE	54	NA	NA	-1.24195	1.2975	NA	NA	-1.24195	1.2975
8	S	T	1	1	1	FALSE	17530.7	-0.107706	0.112925	-0.195145	0.0860928	0.069293	0.304587	-0.151832	0.0667982
8	S	I	2	1	1	FALSE	71	-0.327009	0.832155	-1.35486	1.12015	NA	NA	-0.692542	0.667994
8	S	P	1	1	1	FALSE	14115.3	0.155334	0.116115	-0.117185	0.0909797	0.393735	0.311919	0.00687153	0.0697989
8	S	L	2	1	1	FALSE	8137.33	-0.463113	0.12493	-0.424005	0.10893	NA	NA	-0.440896	0.0821033
8	S	A	1	1	1	FALSE	3267.67	0.0326008	0.151831	0.161252	0.157881	-0.0966173	0.358373	0.0781197	0.104666
8	S	*	1	1	1	TRUE	5630.33	-2.53915	0.123688	-2.53699	0.129191	-2.17821	0.281939	-2.50528	0.0851687
8	S	Y	2	1	1	FALSE	132	0.333115	0.617863	0.396971	0.791479	NA	NA	0.357294	0.487034
9	G	R	1	1	1	FALSE	10804.7	0.353657	0.0966004	0.290753	0.0899057	0.583603	0.24509	0.337682	0.0635609
9	G	S	2	1	1	FALSE	68	-2.25832	0.913081	NA	NA	NA	NA	-2.25832	0.913081
9	G	E	1	1	1	FALSE	9687.67	-0.793146	0.125459	-0.887593	0.101697	-0.160761	0.337873	-0.814406	0.0769269
9	G	D	2	1	1	FALSE	124	-0.818016	0.595151	0.543069	0.896601	NA	NA	-0.401728	0.495854
9	G	A	1	1	1	FALSE	3672	-0.0324278	0.148376	-0.318128	0.14468	0.206889	0.363875	-0.149962	0.0996279
10	Y	K	2	1	1	FALSE	155	0.366936	0.510229	-0.00740769	0.840122	NA	NA	0.266066	0.436102
10	Y	N	2	1	1	FALSE	17248	0.0414371	0.116898	-0.0570146	0.0867314	0.307845	0.306756	-0.00588507	0.0679246
10	Y	S	2	1	1	FALSE	1954	-0.0115104	0.168411	-0.145665	0.201162	NA	NA	-0.0667921	0.129132
10	Y	I	2	1	1	FALSE	169	-0.0774919	0.439726	-0.179766	0.753147	-0.881042	0.822758	-0.240041	0.344788
10	Y	Q	2	1	1	FALSE	74	0.261236	0.857401	0.351789	0.982829	-0.888338	0.95285	-0.0740311	0.534755
10	Y	H	2	1	1	FALSE	14776.7	0.0488324	0.117927	0.0927105	0.09242	-0.0421728	0.304004	0.0696146	0.0707454
10	Y	R	2	1	1	FALSE	125.5	-0.926535	0.653803	-0.659951	0.811698	NA	NA	-0.821636	0.509172
10	Y	L	2	1	1	FALSE	384	-2.20101	0.395884	-1.91735	0.555125	NA	NA	-2.10538	0.322318
10	Y	D	1	1	1	FALSE	2153	-0.321797	0.172603	-0.148225	0.185662	0.10158	0.388414	-0.208486	0.120207
10	Y	*	1	1	1	TRUE	19008	-3.38137	0.10479	-3.53246	0.0905828	-2.52148	0.257349	-3.40518	0.0662208
11	E	K	1	1	1	FALSE	8496.67	0.140962	0.125383	0.0605243	0.106273	0.573931	0.34005	0.119955	0.0788596
11	E	N	2	1	1	FALSE	76.6667	1.38582	0.852217	-1.05635	0.882167	0.590425	1.08595	0.299554	0.533772
11	E	T	2	1	1	FALSE	82	NA	NA	-1.00768	1.0473	NA	NA	-1.00768	1.0473
11	E	R	2	1	1	FALSE	107.5	1.01462	0.725947	0.0635884	0.832972	NA	NA	0.604092	0.547275
11	E	I	2	1	1	FALSE	117	0.211603	0.689359	-0.441224	0.812105	NA	NA	-0.0617956	0.525547
11	E	Q	1	1	1	FALSE	1920.33	0.445595	0.177364	0.572909	0.19419	0.65551	0.399187	0.518269	0.124435
11	E	L	2	1	1	FALSE	97	-0.4695	0.580151	NA	NA	NA	NA	-0.4695	0.580151
12	V	N	2	1	1	FALSE	85.5	0.261757	0.685713	0.775076	1.1116	NA	NA	0.403248	0.583606
12	V	T	2	1	1	FALSE	121	0.574297	0.607444	0.711314	0.875954	NA	NA	0.618791	0.499165
12	V	I	2	1	1	FALSE	13304.3	-0.229367	0.114999	-0.103449	0.0914915	NA	NA	-0.152257	0.0715969
12	V	H	2	1	1	FALSE	58	NA	NA	-2.41912	1.32882	NA	NA	-2.41912	1.32882
12	V	P	2	1	1	FALSE	54	NA	NA	-3.04458	1.47046	NA	NA	-3.04458	1.47046
12	V	L	2	1	1	FALSE	5545.33	-0.605405	0.130751	-0.363616	0.12486	NA	NA	-0.47894	0.0903002
12	V	E	2	1	1	FALSE	202	-0.389352	0.427122	-0.0306658	0.637938	-0.269508	0.757972	-0.276743	0.321425
12	V	D	2	1	1	FALSE	25597	-0.186182	0.114219	-0.123756	0.0801115	-0.034344	0.302957	-0.139416	0.0641022
12	V	A	2	1	1	FALSE	20916.7	0.015179	0.111972	0.104627	0.0828423	0.142536	0.296026	0.0763358	0.0649731
12	V	G	2	1	1	FALSE	4571.67	NA	NA	0.176766	0.13705	NA	NA	0.176766	0.13705
13	H	K	2	1	1	FALSE	98	NA	NA	-1.23173	0.96375	NA	NA	-1.23173	0.96375
13	H	N	2	1	1	FALSE	9818.33	0.749282	0.123051	NA	NA	NA	NA	0.749282	0.123051
13	H	S	2	1	1	FALSE	59	NA	NA	-0.676501	1.22616	NA	NA	-0.676501	1.22616
13	H	I	2	1	1	FALSE	126	0.931949	0.625355	0.536398	0.814532	NA	NA	0.785261	0.496026
13	H	Q	1	1	1	FALSE	28083.3	-0.70584	0.0914832	-0.577075	0.0714852	-0.292139	0.243941	-0.608997	0.0548837
14	H	K	2	1	1	FALSE	71	0.937981	0.919764	0.11521	1.00118	NA	NA	0.561405	0.677329
14	H	N	2	1	1	FALSE	9076.33	0.0996706	0.124451	0.0616197	0.103844	NA	NA	0.0772383	0.079733
14	H	S	2	1	1	FALSE	65	-0.150288	0.881882	-1.72359	1.16806	NA	NA	-0.721501	0.703813
14	H	I	2	1	1	FALSE	96.5	1.25314	0.672239	0.939951	0.985641	NA	NA	1.15371	0.555367
14	H	Q	1	1	1	FALSE	25574	-0.605699	0.094144	-0.604602	0.0749093	-0.332496	0.24801	-0.590609	0.0570457
15	Q	K	1	1	1	FALSE	11878.7	-0.864625	0.119775	-0.85166	0.0956839	-0.123565	0.337767	-0.822473	0.0729916
15	Q	N	2	1	1	FALSE	65	-0.0245589	0.853397	NA	NA	NA	NA	-0.0245589	0.853397
15	Q	R	2	1	1	FALSE	30717	-1.96758	0.107634	-1.965	0.0783139	NA	NA	-1.96589	0.0633257
15	Q	I	2	1	1	FALSE	133	0.879525	0.593231	0.211946	0.816105	NA	NA	0.648731	0.479851
17	L	K	2	1	1	FALSE	109	1.02636	0.834297	-0.453105	0.765425	NA	NA	0.223049	0.564016
17	L	T	2	1	1	FALSE	87.3333	0.644306	0.623806	0.474225	1.01051	0.03949	1.04154	0.48235	0.472934
17	L	I	2	1	1	FALSE	221.5	0.852178	0.459529	1.43143	0.62786	NA	NA	1.05423	0.37082
17	L	M	1	1	1	FALSE	26477.7	0.237058	0.115474	0.168451	0.0795828	0.355212	0.316413	0.197316	0.0641665
17	L	Q	2	1	1	FALSE	144.333	1.09619	0.59697	-0.242666	0.633473	0.343762	0.879736	0.442392	0.389541
17	L	P	2	1	1	FALSE	143.5	0.556507	0.56128	0.173507	0.804212	NA	NA	0.431055	0.460267
17	L	V	1	1	1	FALSE	4143	1.01042	0.144262	0.893605	0.138912	1.14663	0.352223	0.964504	0.0962547
17	L	*	2	1	1	TRUE	30523.7	NA	NA	-3.80621	0.0877422	NA	NA	-3.80621	0.0877422
17	L	Y	2	1	1	FALSE	255	NA	NA	0.54973	0.54376	NA	NA	0.54973	0.54376
17	L	S	2	1	1	FALSE	25714.7	-0.155651	0.111142	-0.0458906	0.0791899	NA	NA	-0.0828497	0.0644936
17	L	W	1	1	1	FALSE	5329.67	0.325508	0.137555	0.304293	0.128911	0.309602	0.341166	0.313887	0.0906783
17	L	C	2	1	1	FALSE	54	NA	NA	-3.04458	1.47046	NA	NA	-3.04458	1.47046
17	L	F	1	1	1	FALSE	24395.3	0.746044	0.0896467	0.698787	0.07046	1.22435	0.239315	0.742644	0.0539699
18	V	K	2	1	1	FALSE	173	-1.38729	0.56518	-0.990475	0.700383	NA	NA	-1.2308	0.439834
18	V	T	2	1	1	FALSE	138.333	0.517973	0.645198	-0.373238	0.606426	0.0823083	1.001	0.050906	0.404244
18	V	I	2	1	1	FALSE	118	0.326918	0.589027	-0.0817303	0.945113	NA	NA	0.212595	0.49989
18	V	M	1	1	1	FALSE	21369.3	-0.387948	0.116943	-0.392819	0.0833021	-0.0693062	0.318756	-0.377229	0.0663618
18	V	L	1	1	1	FALSE	8156.33	-1.24634	0.102536	-1.31644	0.102956	-0.816148	0.256832	-1.24679	0.0699086
18	V	E	2	1	1	FALSE	33703	-0.778963	0.111505	-0.682048	0.0751388	NA	NA	-0.712313	0.0623116
18	V	D	2	1	1	FALSE	53	NA	NA	0.769885	1.27705	NA	NA	0.769885	1.27705
18	V	A	2	1	1	FALSE	20569	-1.07568	0.115894	-0.942149	0.0848553	NA	NA	-0.988751	0.0684653
18	V	G	2	1	1	FALSE	7102.67	-0.660585	0.128229	NA	NA	NA	NA	-0.660585	0.128229
19	F	N	2	1	1	FALSE	158	-1.15855	0.572322	-0.445018	0.741352	NA	NA	-0.892099	0.45303
19	F	T	2	1	1	FALSE	83	-0.754335	0.724936	-0.0603868	1.09425	NA	NA	-0.542662	0.604344
19	F	I	2	1	1	FALSE	38970.7	0.927986	0.110756	0.966228	0.0734227	1.26967	0.301353	0.967033	0.0599729
19	F	H	2	1	1	FALSE	75.5	-1.52005	0.801466	-0.514923	1.11528	NA	NA	-1.17775	0.650842
19	F	P	2	1	1	FALSE	82	NA	NA	-2.32462	1.01043	-1.55505	0.982963	-1.92923	0.704571
19	F	L	2	1	1	FALSE	49310.7	-0.254463	0.0716871	-0.1376	0.0547692	NA	NA	-0.180672	0.0435211
19	F	D	2	1	1	FALSE	52	0.0501646	0.951748	NA	NA	NA	NA	0.0501646	0.951748
19	F	V	2	1	1	FALSE	7779.67	0.384732	0.126469	0.357841	0.110022	NA	NA	0.369425	0.0830071
19	F	*	2	1	1	TRUE	141.5	-3.13746	0.620809	-2.58452	1.05954	NA	NA	-2.99615	0.535637
19	F	Y	1	1	1	FALSE	23507.7	-0.598494	0.1154	-0.816758	0.081187	-0.351778	0.317507	-0.728038	0.0649946
19	F	S	2	1	1	FALSE	11467	-1.09942	0.122339	-0.943151	0.0996499	NA	NA	-1.00548	0.0772624
19	F	C	1	1	1	FALSE	2661.67	-1.74622	0.16537	-2.24795	0.182317	-1.89658	0.376691	-1.96541	0.116485
20	F	N	2	1	1	FALSE	196.667	-0.769154	0.397081	-0.25237	0.679513	-0.174558	0.929339	-0.582137	0.321648
20	F	T	2	1	1	FALSE	201.667	0.487733	0.456264	0.854769	0.607413	-0.456343	0.710044	0.395314	0.324486
20	F	S	2	1	1	FALSE	25507.7	-0.541128	0.106175	NA	NA	NA	NA	-0.541128	0.106175
20	F	I	2	1	1	FALSE	30261.3	0.695749	0.104968	0.768969	0.0765392	0.469899	0.261962	0.729106	0.0601897
20	F	H	2	1	1	FALSE	174.667	0.373836	0.556756	-1.40545	0.641076	-0.705925	0.691052	-0.476183	0.359135
20	F	P	2	1	1	FALSE	93	-1.10767	0.592	-1.59892	1.10017	-0.764599	1.02234	-1.12441	0.464422
20	F	R	2	1	1	FALSE	98	-1.32431	0.676979	-0.512559	1.01958	NA	NA	-1.07593	0.563979
20	F	L	2	1	1	FALSE	78487	-0.489793	0.0682621	-0.389975	0.0501115	-0.419712	0.177801	-0.424674	0.0393915
20	F	D	2	1	1	FALSE	55	-2.53165	1.04288	NA	NA	NA	NA	-2.53165	1.04288
20	F	V	2	1	1	FALSE	5918.33	NA	NA	-0.100395	0.125597	NA	NA	-0.100395	0.125597
20	F	*	2	1	1	TRUE	230.333	-3.33538	0.618098	-3.99581	0.773768	-3.40355	0.902039	-3.55052	0.425755
20	F	Y	2	1	1	FALSE	40416.3	-0.179651	0.107405	-0.108933	0.073419	-0.0298388	0.275675	-0.126768	0.0591974
20	F	C	1	1	1	FALSE	6029.33	-1.44342	0.137745	-1.64982	0.125974	-1.32668	0.33593	-1.53952	0.0895934
21	A	T	1	1	1	FALSE	16404	-0.626259	0.112812	-0.576681	0.0880522	-0.435062	0.287848	-0.586637	0.0674777
21	A	I	2	1	1	FALSE	92	0.374999	0.627467	1.41056	1.16934	NA	NA	0.606516	0.552895
21	A	P	1	1	1	FALSE	3283.67	-1.21252	0.148972	-0.985115	0.15826	-0.493084	0.381433	-1.05985	0.104337
21	A	E	1	1	1	FALSE	10288.3	-1.40374	0.121877	-1.28994	0.101849	-0.866739	0.333882	-1.31232	0.0760958
21	A	D	2	1	1	FALSE	178	NA	NA	-2.10787	0.595963	NA	NA	-2.10787	0.595963
22	E	K	1	1	1	FALSE	6342.33	0.48773	0.129855	0.509602	0.117456	1.06107	0.349893	0.532519	0.0845285
22	E	N	2	1	1	FALSE	89.5	1.67042	0.787785	1.72582	0.910404	NA	NA	1.69414	0.595719
22	E	R	2	1	1	FALSE	119	0.684092	0.806697	0.169293	0.725753	NA	NA	0.399577	0.539539
22	E	I	2	1	1	FALSE	76	-1.21952	0.759436	-2.82319	1.30487	NA	NA	-1.62528	0.656366
22	E	Q	1	1	1	FALSE	2307.33	1.71998	0.161631	1.85037	0.191954	1.26558	0.372166	1.72353	0.117333
23	D	K	2	1	1	FALSE	105	-1.23749	0.71696	-0.00626161	0.883745	NA	NA	-0.748783	0.556776
23	D	N	2	1	1	FALSE	9233.33	1.01774	0.123937	1.03146	0.101878	NA	NA	1.02593	0.0787009
23	D	S	2	1	1	FALSE	128.5	0.635578	0.790931	-0.409646	0.697267	NA	NA	0.0474413	0.523038
23	D	I	2	1	1	FALSE	111	-4.80096	1.16242	-2.98426	1.13716	NA	NA	-3.87266	0.812876
23	D	H	1	1	1	FALSE	2141.67	-0.301064	0.171056	-0.330863	0.183824	0.163986	0.404964	-0.273098	0.119636
23	D	E	1	1	1	FALSE	31050	0.50865	0.0881878	0.674543	0.0678725	0.998873	0.237318	0.631693	0.0524564
24	V	K	2	1	1	FALSE	147.333	0.427452	0.519422	0.0078302	0.677813	-0.276045	0.924116	0.181192	0.376514
24	V	T	2	1	1	FALSE	117.5	-0.814585	0.638653	-2.61052	0.96481	NA	NA	-1.36176	0.532548
24	V	I	2	1	1	FALSE	73	0.474749	0.836866	1.42219	1.04457	NA	NA	0.845132	0.653114
24	V	M	1	1	1	FALSE	15331.7	0.240519	0.119151	0.199511	0.0893307	0.800969	0.327249	0.24098	0.0698278
24	V	L	1	1	1	FALSE	7873.67	-0.504361	0.102006	-0.410792	0.100257	0.128138	0.269863	-0.418399	0.0691178
24	V	E	2	1	1	FALSE	42970.7	-1.10631	0.111116	-0.800021	0.0731845	-0.488087	0.299392	-0.876503	0.0598839
24	V	D	2	1	1	FALSE	187.333	NA	NA	-1.17555	0.66341	NA	NA	-1.17555	0.66341
24	V	A	2	1	1	FALSE	22988.7	-0.147834	0.113655	-0.0845733	0.0807287	0.343634	0.302307	-0.0854491	0.0643092
24	V	G	1	1	1	FALSE	7460.33	0.488051	0.126122	0.650199	0.110911	1.20369	0.345992	0.613677	0.0809744
25	G	N	2	1	1	FALSE	187	-0.145734	0.484105	0.587176	0.728326	NA	NA	0.0788461	0.403168
25	G	T	2	1	1	FALSE	58	NA	NA	-1.93067	1.28658	NA	NA	-1.93067	1.28658
25	G	R	2	1	1	FALSE	5568	0.0609238	0.137102	0.10488	0.130602	-0.191743	0.312146	0.0607915	0.090502
25	G	S	2	1	1	FALSE	16619	0.00609068	0.116524	0.14318	0.0882843	0.150981	0.297792	0.0962417	0.0684823
25	G	E	2	1	1	FALSE	102	-2.87736	0.699004	-2.57915	1.24454	NA	NA	-2.80585	0.609455
25	G	D	2	1	1	FALSE	15007	-2.17173	0.120197	-1.93552	0.092636	-1.55058	0.320673	-2.00001	0.0715248
25	G	A	1	1	1	FALSE	4285	-0.622086	0.145658	-0.471489	0.142733	-0.466554	0.343648	-0.538893	0.097736
26	S	K	2	1	1	FALSE	92.5	-0.479464	0.84033	-1.20398	0.881707	NA	NA	-0.824322	0.608305
26	S	T	1	1	1	FALSE	38428.3	-0.0645854	0.102381	-0.0778182	0.073388	-0.323008	0.249833	-0.0867912	0.0580164
26	S	R	2	1	1	FALSE	71	-1.55927	0.992789	-0.958827	0.998763	NA	NA	-1.26085	0.70411
26	S	I	2	1	1	FALSE	248	-0.46459	0.474796	0.328156	0.5646	NA	NA	-0.136203	0.363385
26	S	Q	2	1	1	FALSE	165.5	-0.16451	0.502816	1.19017	0.794665	NA	NA	0.22279	0.424902
26	S	P	1	1	1	FALSE	27987.3	-2.48717	0.110055	-2.07486	0.0794302	-2.71107	0.270117	-2.2427	0.062651
26	S	L	2	1	1	FALSE	12011.3	-0.179056	0.1166	0.176788	0.096025	NA	NA	0.0329801	0.0741241
26	S	A	1	1	1	FALSE	4129	-0.316433	0.144861	-0.4722	0.143723	-0.349806	0.345722	-0.391315	0.0978549
26	S	V	2	1	1	FALSE	79	0.921193	0.76986	NA	NA	NA	NA	0.921193	0.76986
26	S	*	1	1	1	TRUE	11001	-2.7924	0.107091	-2.97985	0.102694	-2.13511	0.260081	-2.83334	0.0712831
26	S	Y	2	1	1	FALSE	183.333	-0.482548	0.505278	-4.00181e-05	0.565948	-1.0102	0.883058	-0.382831	0.346659
27	N	K	1	1	1	FALSE	6701.33	-2.95194	0.120906	-2.84284	0.120573	-2.09352	0.276243	-2.82717	0.0815688
29	G	N	2	1	1	FALSE	53	NA	NA	-3.02578	1.48059	NA	NA	-3.02578	1.48059
29	G	R	2	1	1	FALSE	4127.67	NA	NA	-3.27895	0.168248	NA	NA	-3.27895	0.168248
29	G	S	2	1	1	FALSE	6938.33	-2.12517	0.13336	-1.95926	0.118473	NA	NA	-2.03244	0.0885706
29	G	E	2	1	1	FALSE	141.5	-2.86552	0.827551	-3.4784	0.846478	NA	NA	-3.16503	0.591745
29	G	D	2	1	1	FALSE	15198.7	-3.2846	0.124792	-3.12498	0.0988885	NA	NA	-3.18655	0.0775043
29	G	A	2	1	1	FALSE	3717.67	NA	NA	-1.77993	0.149338	NA	NA	-1.77993	0.149338
30	A	T	1	1	1	FALSE	18669	1.25481	0.111177	0.94396	0.083995	1.23832	0.297698	1.06567	0.065382
30	A	I	2	1	1	FALSE	104.5	1.46145	0.639776	1.78803	0.957306	NA	NA	1.56228	0.531922
30	A	P	1	1	1	FALSE	5334.33	-0.712162	0.136857	-0.584545	0.127265	-0.276001	0.352589	-0.619712	0.0901022
30	A	E	1	1	1	FALSE	8953.67	-3.37872	0.132567	-3.55874	0.124043	-2.97616	0.34289	-3.44219	0.0875715
30	A	D	2	1	1	FALSE	214.333	-4.0695	0.662464	-5.07585	1.02481	-1.77704	0.891233	-3.64009	0.47194
31	I	K	2	1	1	FALSE	81	NA	NA	-3.22801	1.23262	NA	NA	-3.22801	1.23262
31	I	N	1	1	1	FALSE	16919	-1.60041	0.116286	-1.31381	0.0884654	-0.985249	0.308432	-1.3974	0.0686415
31	I	T	2	1	1	FALSE	15278.7	NA	NA	-0.641136	0.0908793	NA	NA	-0.641136	0.0908793
31	I	S	1	1	1	FALSE	2017	-2.12836	0.173916	-1.79808	0.204615	-1.81297	0.438067	-1.97501	0.126839
32	I	K	2	1	1	FALSE	170.333	-3.41535	0.664571	-3.01568	0.722862	-4.68208	1.13366	-3.45989	0.449191
32	I	N	2	1	1	FALSE	18837.3	-3.37276	0.121366	-3.44924	0.0966549	-2.90099	0.306484	-3.38981	0.073407
32	I	T	2	1	1	FALSE	32257	-3.63095	0.11423	-3.24921	0.0822218	-3.42803	0.286123	-3.38199	0.0649883
32	I	S	1	1	1	FALSE	2972.33	-3.87041	0.19213	-3.29696	0.191495	-3.1977	0.382296	-3.53969	0.127825
32	I	M	1	1	1	FALSE	3598	-3.77818	0.178675	-4.07576	0.200908	-3.21729	0.379512	-3.83335	0.125947
33	G	K	2	1	1	FALSE	70	NA	NA	-0.650592	1.1255	NA	NA	-0.650592	1.1255
33	G	R	1	1	1	FALSE	16069	-2.92089	0.0995665	-2.95411	0.0883868	-2.44181	0.244878	-2.90567	0.0638156
33	G	S	2	1	1	FALSE	84	-3.00166	0.941889	-1.6119	1.01282	NA	NA	-2.35714	0.689729
33	G	E	1	1	1	FALSE	13345	-3.03458	0.123943	-2.95542	0.102049	-2.32504	0.328699	-2.95142	0.076612
33	G	D	2	1	1	FALSE	133.5	-2.48764	0.693187	-4.0173	1.08657	NA	NA	-2.93011	0.584393
33	G	A	1	1	1	FALSE	3378.33	-2.61463	0.163452	-2.84575	0.170951	-2.56162	0.362802	-2.70935	0.112335
34	L	N	2	1	1	FALSE	59	-3.32834	1.12059	-3.79633	1.62892	NA	NA	-3.47867	0.923226
34	L	T	2	1	1	FALSE	52	-1.25917	0.979677	NA	NA	NA	NA	-1.25917	0.979677
34	L	I	1	1	1	FALSE	9378	1.10219	0.124119	1.06624	0.103078	1.44038	0.334637	1.10003	0.077161
34	L	Q	2	1	1	FALSE	104.5	-2.73929	0.760625	-1.24195	0.959165	NA	NA	-2.16121	0.595976
34	L	H	1	1	1	FALSE	44992	-3.04931	0.114529	-2.80115	0.0757474	-2.71076	0.313195	-2.87018	0.0619317
34	L	P	2	1	1	FALSE	18705.7	-3.09504	0.119859	-2.57236	0.0891948	NA	NA	-2.75865	0.0715558
34	L	R	1	1	1	FALSE	5986.33	-3.61162	0.156563	-3.14507	0.143757	-3.26964	0.334983	-3.35042	0.100966
35	M	K	2	1	1	FALSE	24448.3	-3.8226	0.121792	NA	NA	NA	NA	-3.8226	0.121792
35	M	N	2	1	1	FALSE	185	-3.46119	0.629005	-2.46225	0.609409	-2.25162	0.99839	-2.834	0.400854
35	M	T	2	1	1	FALSE	17491.7	-3.34266	0.123445	NA	NA	NA	NA	-3.34266	0.123445
35	M	R	1	1	1	FALSE	3335.33	-3.72186	0.186998	-2.39085	0.161022	-4.34583	0.407255	-3.07192	0.116885
35	M	I	1	1	1	FALSE	32270.3	-2.09216	0.0758459	-1.92529	0.0613995	-1.66122	0.197291	-1.9731	0.0463846
36	V	K	2	1	1	FALSE	178	-3.71899	0.566146	-3.4784	0.846478	-3.38444	1.19661	-3.60978	0.437943
36	V	T	2	1	1	FALSE	137	-1.07377	0.562072	-1.45493	0.900077	NA	NA	-1.1807	0.476749
36	V	I	2	1	1	FALSE	135.333	1.41969	0.681542	-0.353421	0.644976	0.0187182	0.825054	0.370788	0.407374
36	V	M	1	1	1	FALSE	20384.7	-0.0123762	0.117151	0.0882879	0.0841098	0.16376	0.319316	0.0588512	0.0668116
36	V	Q	2	1	1	FALSE	90	NA	NA	-3.55851	1.23639	NA	NA	-3.55851	1.23639
36	V	L	1	1	1	FALSE	12222.7	0.579448	0.0940688	0.651085	0.0849916	0.885782	0.243267	0.635696	0.0610458
36	V	E	2	1	1	FALSE	28938.7	-3.12316	0.116617	-2.82863	0.0816074	NA	NA	-2.92545	0.066862
36	V	D	2	1	1	FALSE	177.667	-3.86734	0.738444	-5.33854	1.21523	-2.67873	0.907612	-3.74742	0.518131
36	V	A	2	1	1	FALSE	17123	-1.98283	0.116807	-1.76273	0.0882586	NA	NA	-1.84272	0.0704174
36	V	G	1	1	1	FALSE	4241	-2.92026	0.151114	-2.07447	0.144788	-2.2137	0.37917	-2.46053	0.100785
37	G	N	2	1	1	FALSE	81	-4.12274	0.920523	-0.224206	1.2738	-4.43413	1.45195	-3.1297	0.663609
37	G	R	2	1	1	FALSE	4741.67	-3.37267	0.156946	-3.08546	0.153706	NA	NA	-3.22607	0.109814
37	G	S	1	1	1	FALSE	15543	-2.45323	0.120737	-0.867577	0.0899678	-2.61045	0.323182	-1.48954	0.0704088
37	G	I	2	1	1	FALSE	58	-3.56559	1.20852	NA	NA	NA	NA	-3.56559	1.20852
37	G	E	2	1	1	FALSE	74	NA	NA	-3.13708	1.2725	NA	NA	-3.13708	1.2725
37	G	D	1	1	1	FALSE	18650.3	-3.12703	0.120471	-3.09181	0.0946895	-3.15625	0.309643	-3.10805	0.0723833
37	G	A	1	1	1	FALSE	3928.33	-2.80016	0.156127	-2.9193	0.158226	-2.48699	0.367396	-2.82775	0.106373
38	G	N	2	1	1	FALSE	209.5	-1.19938	0.50128	-1.75705	0.666183	NA	NA	-1.40099	0.40055
38	G	R	2	1	1	FALSE	4981	-3.59263	0.153603	-3.16907	0.150847	-1.6261	0.327392	-3.20625	0.102243
38	G	S	2	1	1	FALSE	26995	-2.41044	0.114992	-2.38966	0.0812861	-2.35979	0.298527	-2.39485	0.0647944
38	G	L	2	1	1	FALSE	51	-4.53559	1.7024	NA	NA	NA	NA	-4.53559	1.7024
38	G	E	2	1	1	FALSE	172	-3.51853	0.712315	-3.54727	0.87839	NA	NA	-3.52993	0.553262
38	G	D	2	1	1	FALSE	21143	-2.22684	0.11678	-2.15174	0.0857431	-2.18165	0.304252	-2.17822	0.0673971
38	G	A	2	1	1	FALSE	4862.67	-3.72993	0.160727	-3.57264	0.155175	NA	NA	-3.64852	0.111636
39	V	N	2	1	1	FALSE	89.3333	-2.2881	0.768951	-1.38235	0.878932	-2.15141	1.10849	-1.95024	0.513021
39	V	T	2	1	1	FALSE	168.5	-1.472	0.521575	-1.84915	0.814515	NA	NA	-1.58168	0.439238
39	V	I	2	1	1	FALSE	15043.3	0.203112	0.115437	0.0571801	0.0889501	NA	NA	0.111547	0.0704591
39	V	L	2	1	1	FALSE	4966.33	-1.7453	0.137444	-1.48165	0.131644	NA	NA	-1.6078	0.0950709
39	V	E	2	1	1	FALSE	259	-4.04736	0.523984	-3.80337	0.729122	-3.64787	1.01726	-3.91715	0.392546
39	V	D	2	1	1	FALSE	29255.7	-3.97425	0.119567	-3.82891	0.0885398	-3.25175	0.300982	-3.84711	0.0692461
39	V	A	2	1	1	FALSE	21726	-3.26124	0.11604	-2.89399	0.0881263	-2.09715	0.289518	-2.97664	0.0682062
39	V	G	1	1	1	FALSE	5140.33	-4.43475	0.182734	-4.68365	0.200729	-3.0605	0.352443	-4.35697	0.126172
40	V	N	2	1	1	FALSE	185	-3.48015	0.625751	-3.89383	1.00409	NA	NA	-3.59587	0.531064
40	V	T	2	1	1	FALSE	142.333	-3.4984	0.599	-4.28524	1.17692	-2.4911	1.11706	-3.44291	0.481661
40	V	I	2	1	1	FALSE	16779.3	-1.48707	0.117222	-1.39534	0.0878062	NA	NA	-1.42831	0.0702766
40	V	L	1	1	1	FALSE	5444	-2.8908	0.145097	-2.26153	0.130458	-2.24263	0.363022	-2.52282	0.0937228
40	V	E	2	1	1	FALSE	137	NA	NA	-4.66379	1.33655	NA	NA	-4.66379	1.33655
40	V	D	1	1	1	FALSE	33857.3	-3.66955	0.117796	-3.26094	0.0814601	-2.9249	0.316471	-3.37305	0.0655471
40	V	A	2	1	1	FALSE	22093	-3.17987	0.118333	NA	NA	NA	NA	-3.17987	0.118333
40	V	G	1	1	1	FALSE	7133.67	-3.18868	0.14041	-3.95979	0.147715	-2.97677	0.341483	-3.50755	0.0975301
41	I	K	1	1	1	FALSE	24828	-3.22207	0.115643	-2.98301	0.0841728	-2.938	0.295619	-3.05937	0.0663197
41	I	N	2	1	1	FALSE	1115	-1.66769	0.212009	-1.09932	0.259108	NA	NA	-1.43977	0.164082
41	I	T	1	1	1	FALSE	22218	-3.43478	0.117033	-3.19435	0.0885125	-3.10009	0.302865	-3.27247	0.0687527
41	I	R	1	1	1	FALSE	2552.67	-3.32577	0.18518	-3.42907	0.206192	-2.61723	0.407255	-3.29439	0.130508
42	A	T	2	1	1	FALSE	14543.3	0.515655	0.116639	0.500226	0.0899521	NA	NA	0.50598	0.0712302
42	A	M	2	1	1	FALSE	221	0.401867	0.462147	0.953146	0.638827	NA	NA	0.591261	0.374438
42	A	P	1	1	1	FALSE	2985.33	-2.62803	0.166221	-2.06756	0.168089	-2.05011	0.384451	-2.32495	0.112973
42	A	E	2	1	1	FALSE	8643.67	-2.87764	0.129981	NA	NA	NA	NA	-2.87764	0.129981
42	A	G	1	1	1	FALSE	4756.33	-1.98529	0.142988	-2.04545	0.135255	-1.2947	0.372452	-1.97004	0.0950094
42	A	V	2	1	1	FALSE	20902	0.561289	0.113829	0.4091	0.0824102	NA	NA	0.461437	0.0667524
42	A	*	2	1	1	TRUE	72	NA	NA	-4.03137	1.52995	NA	NA	-4.03137	1.52995
42	A	S	2	1	1	FALSE	16357	-0.277661	0.114591	-0.142741	0.0874652	NA	NA	-0.192409	0.0695264
42	A	L	2	1	1	FALSE	122.5	0.992828	0.580614	0.95645	0.912044	NA	NA	0.982337	0.489787
41	I	M	1	1	1	FALSE	20441.3	-2.15985	0.118445	-1.79449	0.0855817	-1.86229	0.320279	-1.91723	0.0677968
41	I	Q	2	1	1	FALSE	93	-3.79561	1.13997	NA	NA	NA	NA	-3.79561	1.13997
41	I	L	1	1	1	FALSE	43335.7	-1.79868	0.086982	-1.67291	0.0658855	-1.45831	0.224627	-1.70526	0.0511405
41	I	E	2	1	1	FALSE	292.333	-4.48385	0.656525	-5.75406	1.16926	-3.62555	0.807716	-4.39954	0.467051
41	I	A	2	1	1	FALSE	169	-5.05033	0.924402	-4.53405	1.11818	-1.93435	0.942745	-3.78421	0.568402
41	I	V	1	1	1	FALSE	35186	-2.64788	0.107442	-2.11076	0.0756489	-2.16909	0.266651	-2.28267	0.0602549
41	I	*	2	1	1	TRUE	315.333	-1.73323	0.393111	-1.25909	0.456379	-1.84395	0.71174	-1.57788	0.274761
41	I	S	2	1	1	FALSE	195.333	-5.42807	1.0918	-3.97386	0.778142	-3.28672	1.08555	-4.16459	0.547257
41	I	F	2	1	1	FALSE	519.667	0.706821	0.266092	0.464302	0.364379	NA	NA	0.622472	0.214892
40	V	Y	2	1	1	FALSE	62.5	-1.38872	0.941249	-3.05201	1.31196	NA	NA	-1.95392	0.764784
40	V	S	2	1	1	FALSE	70	-4.29264	1.25602	-1.63738	1.24781	NA	NA	-2.9563	0.885222
40	V	F	1	1	1	FALSE	5316.33	-2.16571	0.139786	-2.11069	0.130596	-1.42488	0.370972	-2.09218	0.0924201
39	V	Y	2	1	1	FALSE	82	-3.45639	0.88399	-2.13284	1.27995	NA	NA	-3.02896	0.727375
39	V	S	2	1	1	FALSE	90	NA	NA	-4.95322	1.80337	NA	NA	-4.95322	1.80337
39	V	F	1	1	1	FALSE	4522	-2.28815	0.142772	-2.42809	0.14356	-1.1313	0.404316	-2.28539	0.0982011
38	G	V	2	1	1	FALSE	4860.33	-2.73502	0.142426	-2.88828	0.146412	NA	NA	-2.80954	0.10209
38	G	Y	2	1	1	FALSE	203.5	-3.11438	0.606074	-3.08117	0.751197	NA	NA	-3.10128	0.471693
38	G	*	2	1	1	TRUE	318.667	-2.90873	0.409139	-4.00302	0.63162	-3.23124	0.836373	-3.23204	0.317659
38	G	C	2	1	1	FALSE	35755.7	-0.948098	0.110691	-0.725741	0.0745204	-0.657651	0.296945	-0.789382	0.0605193
38	G	F	2	1	1	FALSE	106	-0.810376	0.806583	-1.61558	0.826342	NA	NA	-1.20324	0.577199
37	G	V	2	1	1	FALSE	13522.3	-2.87927	0.124538	-2.71937	0.0989556	NA	NA	-2.78126	0.0774756
37	G	Y	2	1	1	FALSE	148.5	-3.23485	0.772778	-4.49956	1.12565	NA	NA	-3.63998	0.637093
37	G	*	2	1	1	TRUE	137.333	-3.80243	0.808467	-5.78142	1.64895	-3.33783	1.13303	-3.93914	0.611225
37	G	C	1	1	1	FALSE	34245.3	-0.745931	0.110962	-0.857002	0.0762286	-0.543043	0.290307	-0.808935	0.061409
37	G	F	2	1	1	FALSE	95.5	-1.36145	0.727778	-1.7692	0.998032	NA	NA	-1.503	0.588037
36	V	*	2	1	1	TRUE	67	NA	NA	-4.65631	1.89167	NA	NA	-4.65631	1.89167
36	V	S	2	1	1	FALSE	56	-1.99006	0.982833	NA	NA	NA	NA	-1.99006	0.982833
36	V	W	2	1	1	FALSE	51	NA	NA	-4.38179	1.99472	NA	NA	-4.38179	1.99472
35	M	L	1	1	1	FALSE	23049.3	-3.31709	0.10094	-2.70798	0.079632	-2.56208	0.25911	-2.92076	0.0607751
35	M	E	2	1	1	FALSE	176.667	-4.35562	0.790148	-5.96893	1.62729	-5.34436	1.70131	-4.76461	0.65585
35	M	A	2	1	1	FALSE	170	-3.31181	0.57096	-4.99697	1.26797	-4.83326	1.32941	-3.76043	0.484767
35	M	V	2	1	1	FALSE	24709.3	-1.74311	0.112644	-1.55377	0.0814861	NA	NA	-1.61882	0.0660224
35	M	*	2	1	1	TRUE	377.667	-4.44028	0.531444	-4.92104	0.741846	-3.31091	0.89646	-4.35974	0.389188
35	M	S	2	1	1	FALSE	204	-4.27583	0.732827	-3.51277	0.88788	NA	NA	-3.96664	0.565181
35	M	F	2	1	1	FALSE	109	-3.3492	0.84492	NA	NA	NA	NA	-3.3492	0.84492
34	L	D	2	1	1	FALSE	86	NA	NA	-3.8022	1.3283	NA	NA	-3.8022	1.3283
34	L	V	1	1	1	FALSE	5564.33	0.639653	0.135418	0.692374	0.125274	0.94997	0.345959	0.686666	0.0888732
34	L	Y	2	1	1	FALSE	164	-2.34288	0.629078	-3.69285	0.898479	NA	NA	-2.78696	0.515322
34	L	S	2	1	1	FALSE	85	-3.90882	0.96315	-3.86457	1.59843	NA	NA	-3.89703	0.824961
34	L	C	2	1	1	FALSE	62	-1.77233	0.844277	-4.36187	2.00311	NA	NA	-2.16296	0.777995
34	L	F	1	1	1	FALSE	14941	-0.965579	0.1196	-0.668772	0.090431	-0.225837	0.329376	-0.751524	0.0704626
33	G	V	1	1	1	FALSE	6980.67	-2.92933	0.138375	-2.66732	0.124756	-2.32075	0.31676	-2.74822	0.0889312
33	G	*	1	1	1	TRUE	9820.33	-3.40233	0.133464	-3.52057	0.118669	-1.88248	0.339029	-3.3668	0.0857964
33	G	W	2	1	1	FALSE	51	NA	NA	-3.27651	1.56426	NA	NA	-3.27651	1.56426
33	G	C	2	1	1	FALSE	117	-3.95717	0.853681	-3.56963	1.23216	NA	NA	-3.83148	0.701718
32	I	H	2	1	1	FALSE	53	NA	NA	-4.40132	1.98662	NA	NA	-4.40132	1.98662
32	I	L	2	1	1	FALSE	3129	-3.12367	0.163118	NA	NA	NA	NA	-3.12367	0.163118
32	I	D	2	1	1	FALSE	162.333	-3.07468	0.579778	-1.74539	0.753019	-4.21204	1.00254	-2.86317	0.417631
32	I	A	2	1	1	FALSE	120.667	-4.34143	0.883878	-1.93544	0.860806	-5.25874	1.72239	-3.35116	0.580586
32	I	V	2	1	1	FALSE	19503.3	-1.91401	0.110588	-1.73908	0.0852524	-1.69502	0.279986	-1.79828	0.065637
32	I	Y	2	1	1	FALSE	159.333	-5.9461	1.49149	-5.79119	1.64772	-3.69064	1.17077	-4.84585	0.803893
32	I	F	2	1	1	FALSE	16092	-3.18235	0.119405	-2.5549	0.0921068	-2.64041	0.316822	-2.78149	0.0710715
31	I	M	1	1	1	FALSE	3255	-1.58285	0.153283	-1.30846	0.159459	-0.950966	0.378427	-1.41177	0.106076
31	I	L	1	1	1	FALSE	2801	-3.91914	0.204524	-3.12938	0.190069	-3.50277	0.387527	-3.49621	0.131029
31	I	D	2	1	1	FALSE	173.5	-3.64298	0.689461	-4.42049	1.14356	NA	NA	-3.85026	0.59045
31	I	A	2	1	1	FALSE	128	-2.54967	0.848064	-3.28827	0.854916	NA	NA	-2.916	0.60208
31	I	V	2	1	1	FALSE	26260.3	-1.1572	0.112648	NA	NA	NA	NA	-1.1572	0.112648
31	I	Y	2	1	1	FALSE	117.667	-1.45768	0.712943	-1.12847	0.672543	-1.92879	1.10927	-1.38856	0.44762
31	I	F	1	1	1	FALSE	23762	-1.69727	0.11589	-1.69404	0.0821515	-1.12641	0.319203	-1.67111	0.0655903
30	A	G	1	1	1	FALSE	5589	-0.352295	0.131182	0.276202	0.125002	0.268275	0.35236	-0.00487594	0.087651
30	A	V	1	1	1	FALSE	22168.7	1.65527	0.107795	1.64335	0.0806457	2.07287	0.299307	1.66654	0.0631219
30	A	S	1	1	1	FALSE	9654.33	-2.44897	0.124634	-2.66328	0.108445	-1.92192	0.341103	-2.53563	0.0795549
30	A	L	2	1	1	FALSE	52	NA	NA	-1.16291	1.31932	NA	NA	-1.16291	1.31932
29	G	V	2	1	1	FALSE	4027.67	0.709401	0.137831	0.869021	0.141835	NA	NA	0.786927	0.0988465
29	G	Y	2	1	1	FALSE	92	-5.15764	1.57654	-4.24462	1.45391	NA	NA	-4.66424	1.06879
29	G	*	2	1	1	TRUE	185	-4.16386	0.748231	-4.19044	0.851393	-4.05728	1.04578	-4.14896	0.495067
29	G	C	2	1	1	FALSE	20064	-0.848504	0.114562	-0.675648	0.085078	-0.802298	0.301906	-0.740267	0.0666194
28	K	N	1	1	1	FALSE	32731.7	-0.269879	0.0885046	0.0271724	0.0678358	-0.122122	0.232406	-0.0847619	0.0524511
28	K	T	1	1	1	FALSE	4909.33	-0.95398	0.137396	-0.648152	0.133872	-0.797404	0.354037	-0.797115	0.0925494
28	K	R	1	1	1	FALSE	36424	-0.834451	0.11096	-0.586925	0.0749619	-0.467154	0.301723	-0.656471	0.0608395
28	K	S	2	1	1	FALSE	187.5	NA	NA	-1.15367	0.620735	NA	NA	-1.15367	0.620735
28	K	I	1	1	1	FALSE	28700.7	-1.57335	0.110804	-1.1314	0.0783596	-1.49778	0.292942	-1.28871	0.0625045
28	K	M	2	1	1	FALSE	194.5	-2.23368	0.622736	-2.74684	0.674133	NA	NA	-2.46995	0.457433
28	K	Q	1	1	1	FALSE	4648	-0.0763035	0.140318	-0.585065	0.134378	-0.49119	0.356495	-0.351996	0.0936436
28	K	H	2	1	1	FALSE	71	-0.447601	0.822218	NA	NA	NA	NA	-0.447601	0.822218
28	K	E	1	1	1	FALSE	29878.3	-2.38409	0.113108	-2.23518	0.0802257	-2.34762	0.3021	-2.28783	0.0639538
28	K	D	2	1	1	FALSE	189.667	-3.25801	0.618726	-2.79366	0.648796	-3.45869	0.885296	-3.12277	0.39956
28	K	G	2	1	1	FALSE	207.667	-1.43391	0.430149	-0.485176	0.581621	-1.80972	0.950903	-1.18155	0.325014
28	K	V	2	1	1	FALSE	248.667	-0.849654	0.421926	-1.89326	0.540414	-0.722615	0.729575	-1.15503	0.302612
28	K	*	1	1	1	TRUE	32882.3	-3.85144	0.114718	-3.85583	0.087021	-3.31873	0.288442	-3.82498	0.0674108
28	K	Y	2	1	1	FALSE	358.333	-0.579521	0.339976	-0.350145	0.415291	NA	NA	-0.487481	0.263067
28	K	L	2	1	1	FALSE	202	-3.35263	0.564289	-3.60226	0.706119	-3.68549	1.07801	-3.48367	0.408024
27	N	T	2	1	1	FALSE	5675	-2.22106	0.139464	-2.14968	0.130305	NA	NA	-2.18295	0.0952128
27	N	S	1	1	1	FALSE	16589.3	-2.83276	0.120717	-2.20488	0.0929168	-2.76155	0.321814	-2.45455	0.0717763
27	N	I	1	1	1	FALSE	25295.7	0.138257	0.113001	0.442713	0.080106	0.356848	0.317455	0.341534	0.0640088
27	N	M	2	1	1	FALSE	72	NA	NA	0.47885	1.09761	NA	NA	0.47885	1.09761
27	N	H	1	1	1	FALSE	4892	-0.508058	0.141931	-0.556863	0.135762	-0.533047	0.338416	-0.533505	0.0942271
27	N	L	2	1	1	FALSE	85	-1.54991	0.77913	NA	NA	NA	NA	-1.54991	0.77913
27	N	D	1	1	1	FALSE	48326	-3.72826	0.115207	-3.51245	0.0772831	-3.2678	0.297122	-3.56553	0.0627333
27	N	A	2	1	1	FALSE	80	-1.68995	0.808637	NA	NA	NA	NA	-1.68995	0.808637
27	N	G	2	1	1	FALSE	241	-6.19847	1.47514	-4.06233	0.760943	-5.06645	1.05601	-4.67274	0.569499
27	N	V	2	1	1	FALSE	311.333	-0.187845	0.382009	-0.792951	0.457655	-0.299964	0.67274	-0.414548	0.268835
27	N	Y	1	1	1	FALSE	30144.3	0.286399	0.111965	0.545592	0.0770805	0.593693	0.316031	0.467348	0.0622461
27	N	*	2	1	1	TRUE	92	-3.73926	0.897857	-4.6859	1.88186	NA	NA	-3.91479	0.81035
27	N	C	2	1	1	FALSE	95	-2.19978	0.620892	-0.788282	1.01817	-2.94242	1.17383	-2.00778	0.483122
27	N	F	2	1	1	FALSE	328.5	0.118682	0.370658	1.65096	0.550306	NA	NA	0.596884	0.307426
26	S	C	2	1	1	FALSE	54	NA	NA	-1.16142	1.29466	NA	NA	-1.16142	1.29466
26	S	F	2	1	1	FALSE	202.5	-0.753775	0.49957	-0.797697	0.662853	NA	NA	-0.769686	0.398953
25	G	V	2	1	1	FALSE	6183.67	NA	NA	-0.0473085	0.119171	NA	NA	-0.0473085	0.119171
25	G	Y	2	1	1	FALSE	95.5	-1.50325	0.930225	-1.7057	0.844917	NA	NA	-1.61418	0.625436
25	G	*	2	1	1	TRUE	137	-0.552903	0.650847	-3.65947	0.849035	-2.47224	0.850705	-1.91002	0.441523
25	G	C	2	1	1	FALSE	25078.7	-0.629667	0.114129	-0.328086	0.0806695	-0.580763	0.288932	-0.436081	0.0642269
25	G	W	2	1	1	FALSE	54	NA	NA	-4.43929	1.97123	NA	NA	-4.43929	1.97123
25	G	F	2	1	1	FALSE	90	-1.54822	0.757553	NA	NA	NA	NA	-1.54822	0.757553
24	V	*	2	1	1	TRUE	72	-2.78229	1.09632	-3.1617	1.15183	NA	NA	-2.96263	0.794115
24	V	S	2	1	1	FALSE	80	-0.757913	0.683313	-1.17988	1.28349	NA	NA	-0.851101	0.60316
24	V	W	2	1	1	FALSE	56	-4.62911	1.67887	NA	NA	NA	NA	-4.62911	1.67887
23	D	A	1	1	1	FALSE	1604.67	-1.34128	0.186046	-1.11029	0.211373	-0.305028	0.474344	-1.16583	0.133969
23	D	G	2	1	1	FALSE	17310.7	0.92687	0.115231	0.889012	0.0862647	NA	NA	0.902609	0.0690574
23	D	V	2	1	1	FALSE	13746	-2.83272	0.120566	-2.81038	0.0982949	NA	NA	-2.8193	0.0761842
23	D	Y	1	1	1	FALSE	6806	-2.92327	0.138926	-2.70725	0.124014	-2.45356	0.351316	-2.78038	0.0894656
23	D	C	2	1	1	FALSE	78.5	-2.57784	0.91795	-1.26288	1.03546	NA	NA	-1.99918	0.686894
23	D	F	2	1	1	FALSE	71	-4.83787	1.6327	-4.7426	1.86373	NA	NA	-4.7965	1.2281
22	E	D	1	1	1	FALSE	41821.3	0.321936	0.0875719	0.27064	0.0646021	0.297184	0.229756	0.28913	0.0507051
22	E	A	1	1	1	FALSE	2578.33	1.19067	0.160695	1.08247	0.172886	1.13329	0.377194	1.13988	0.112359
22	E	G	1	1	1	FALSE	22451.7	2.22551	0.112235	2.45866	0.0816074	2.37625	0.293373	2.37794	0.0643943
22	E	V	1	1	1	FALSE	21439.3	-0.222374	0.111558	0.131203	0.0827063	-0.143956	0.300963	-0.0011647	0.0648771
22	E	*	1	1	1	TRUE	14392.3	-2.93723	0.122762	-2.56717	0.0978852	-2.50373	0.308567	-2.69899	0.0742832
22	E	Y	2	1	1	FALSE	108	NA	NA	-1.43314	0.756596	NA	NA	-1.43314	0.756596
22	E	L	2	1	1	FALSE	90	-1.28366	0.818763	-1.13308	0.928759	NA	NA	-1.21781	0.614179
21	A	G	1	1	1	FALSE	5684.67	-0.0188522	0.132562	0.244585	0.12392	0.357792	0.350551	0.136491	0.0876504
21	A	V	1	1	1	FALSE	13754	0.522239	0.112096	0.538241	0.0915882	0.913814	0.308786	0.550977	0.0691247
21	A	S	1	1	1	FALSE	5417	-0.649063	0.134283	-0.774602	0.126243	-0.251398	0.360571	-0.687336	0.0891242
18	V	*	2	1	1	TRUE	63	-3.05477	1.09293	-2.71349	1.26092	NA	NA	-2.90836	0.825874
16	K	N	1	1	1	FALSE	22432.3	0.53861	0.0914887	0.598631	0.0731696	0.807515	0.238045	0.587873	0.0555639
16	K	T	1	1	1	FALSE	6391.67	0.895596	0.131511	0.958164	0.126929	0.548829	0.329068	0.900871	0.088003
16	K	R	1	1	1	FALSE	22411	-0.646474	0.114149	-0.427624	0.0839458	-0.631097	0.316596	-0.509966	0.0661354
16	K	S	2	1	1	FALSE	118	-0.0502825	0.558731	-0.0222165	1.02609	NA	NA	-0.0438639	0.490699
16	K	I	1	1	1	FALSE	24391	-1.92696	0.115205	-1.97913	0.083297	-2.19688	0.316498	-1.97147	0.0660165
16	K	M	2	1	1	FALSE	107	-1.79656	0.772302	-2.55923	0.917204	NA	NA	-2.11296	0.590768
16	K	Q	1	1	1	FALSE	6947.33	0.251241	0.13543	-0.139918	0.120081	-0.0662143	0.325044	0.0252589	0.0866011
16	K	H	2	1	1	FALSE	69	-0.242749	0.83109	NA	NA	NA	NA	-0.242749	0.83109
16	K	L	2	1	1	FALSE	153	-1.73741	0.499468	NA	NA	NA	NA	-1.73741	0.499468
16	K	E	1	1	1	FALSE	28094.3	-1.34988	0.11395	-1.11268	0.0802282	-1.23889	0.30205	-1.19344	0.0641056
16	K	D	2	1	1	FALSE	142.667	-1.67017	0.493028	NA	NA	NA	NA	-1.67017	0.493028
16	K	G	2	1	1	FALSE	118.667	-0.320994	0.56462	-1.39267	0.894311	-1.02112	0.851799	-0.720774	0.416473
16	K	V	2	1	1	FALSE	75.6667	-1.17711	0.676207	1.29728	1.14282	-3.99211	1.35231	-1.07559	0.534564
16	K	*	1	1	1	TRUE	27577	-3.91406	0.120144	-4.02078	0.0956303	-4.06474	0.31117	-3.98405	0.0727484
16	K	Y	2	1	1	FALSE	176.5	-0.0537121	0.56448	NA	NA	NA	NA	-0.0537121	0.56448
15	Q	H	1	1	1	FALSE	43791	0.423351	0.0887444	0.359186	0.0659724	0.0813809	0.228665	0.366727	0.0515806
15	Q	P	1	1	1	FALSE	6464	1.21697	0.12949	1.25411	0.116751	1.22951	0.337781	1.23696	0.0839874
15	Q	L	1	1	1	FALSE	35421.3	0.0800094	0.107304	0.0580192	0.0744965	-2.82416e-05	0.267163	0.061921	0.0596497
15	Q	E	1	1	1	FALSE	2624.67	-0.798316	0.159047	-0.494576	0.17544	-0.460957	0.384771	-0.644119	0.112668
15	Q	D	2	1	1	FALSE	60	NA	NA	-2.74266	1.34624	NA	NA	-2.74266	1.34624
15	Q	*	1	1	1	TRUE	6592	-2.46598	0.13252	-2.39801	0.122728	-1.66538	0.354742	-2.38315	0.087277
15	Q	Y	2	1	1	FALSE	97	NA	NA	-1.67614	0.983695	NA	NA	-1.67614	0.983695
14	H	P	2	1	1	FALSE	4359	NA	NA	0.577414	0.138356	NA	NA	0.577414	0.138356
14	H	R	2	1	1	FALSE	23670.7	-0.400785	0.109718	-0.555113	0.0808815	-0.333425	0.303677	-0.493422	0.0636573
14	H	L	2	1	1	FALSE	28256	-0.225416	0.107354	-0.152004	0.0770173	0.348668	0.29007	-0.153574	0.0611714
14	H	D	1	1	1	FALSE	2287.33	-0.847419	0.168503	-0.671464	0.17968	-0.130508	0.400644	-0.710497	0.117506
14	H	*	2	1	1	TRUE	79	NA	NA	-3.71679	1.36106	NA	NA	-3.71679	1.36106
14	H	Y	2	1	1	FALSE	8849	-0.595167	0.12451	NA	NA	NA	NA	-0.595167	0.12451
14	H	C	2	1	1	FALSE	103	-0.403966	0.68163	-1.69141	0.960001	NA	NA	-0.835477	0.555781
13	H	P	1	1	1	FALSE	2607	0.613744	0.156903	0.745484	0.173833	0.889936	0.392567	0.690449	0.111663
13	H	R	2	1	1	FALSE	23363	-0.135955	0.10841	-0.246785	0.0801627	-0.161924	0.29936	-0.205584	0.0630114
13	H	L	2	1	1	FALSE	24168.3	-0.951497	0.110087	-0.788088	0.0793327	-0.317287	0.29931	-0.820667	0.0629234
13	H	D	1	1	1	FALSE	1502	-1.1267	0.189157	-0.862378	0.227741	-1.09391	0.432883	-1.02642	0.137927
13	H	*	2	1	1	TRUE	71	-2.787	0.949421	NA	NA	NA	NA	-2.787	0.949421
13	H	Y	2	1	1	FALSE	9134.67	0.576599	0.123597	0.743878	0.10226	NA	NA	0.675901	0.078789
13	H	C	2	1	1	FALSE	89.5	0.222304	0.682672	0.160896	1.06361	NA	NA	0.204387	0.574514
13	H	F	2	1	1	FALSE	82	0.325432	0.782535	0.465234	0.998915	NA	NA	0.378599	0.616018
12	V	Y	2	1	1	FALSE	127	-0.338481	0.778819	-2.34436	0.762196	NA	NA	-1.36306	0.544736
12	V	S	2	1	1	FALSE	103.5	-0.397425	0.708683	-0.847709	0.89769	NA	NA	-0.57031	0.556239
12	V	F	2	1	1	FALSE	6926.33	-0.00905599	0.127842	NA	NA	NA	NA	-0.00905599	0.127842
11	E	D	1	1	1	FALSE	48825.7	0.294331	0.0865972	0.410415	0.0632243	0.0277669	0.225951	0.353421	0.0498071
11	E	A	1	1	1	FALSE	3772.67	0.168677	0.145056	0.305111	0.150995	0.152195	0.352207	0.227514	0.100277
11	E	G	1	1	1	FALSE	28171.7	0.590872	0.109278	0.6297	0.0771394	0.690896	0.288068	0.620172	0.0615639
11	E	V	1	1	1	FALSE	31885	0.238644	0.108853	0.254301	0.0758899	0.242399	0.274023	0.248847	0.060707
11	E	*	1	1	1	TRUE	6095.33	-2.91838	0.140154	-3.05263	0.13478	-2.45117	0.351653	-2.95005	0.0936406
11	E	Y	2	1	1	FALSE	90.5	-0.563596	0.632574	1.10029	1.20916	NA	NA	-0.206062	0.560505
10	Y	C	2	1	1	FALSE	16783.3	-0.132496	0.116551	-0.163455	0.0880117	-0.159415	0.297689	-0.152592	0.0683589
10	Y	F	2	1	1	FALSE	18953	-0.0369552	0.115217	-0.125565	0.084682	0.362512	0.308571	-0.0731821	0.0666249
9	G	V	1	1	1	FALSE	9918.33	-0.0670998	0.124349	-0.368359	0.100216	0.0646046	0.332391	-0.233317	0.0759643
9	G	*	2	1	1	TRUE	20819.3	-3.38283	0.12036	-3.04025	0.0898812	NA	NA	-3.1629	0.0720164
9	G	W	2	1	1	FALSE	109	0.443317	0.572716	-0.662837	0.846777	-0.316994	1.0267	0.0234458	0.430649
9	G	C	2	1	1	FALSE	161.333	0.113836	0.491668	-0.491025	0.653298	-0.201555	0.912566	-0.119992	0.360831
9	G	L	2	1	1	FALSE	83	-0.826905	0.834731	-1.28204	0.9751	NA	NA	-1.01938	0.634118
8	S	F	2	1	1	FALSE	80	0.597708	0.766485	NA	NA	NA	NA	0.597708	0.766485
7	D	A	1	1	1	FALSE	4058.33	0.222639	0.145941	0.0871405	0.14278	0.35672	0.350571	0.169292	0.0979915
7	D	G	2	1	1	FALSE	13039.7	0.356721	0.120271	0.255527	0.0932957	NA	NA	0.293544	0.0737169
7	D	V	1	1	1	FALSE	14759.3	-0.604742	0.118552	-0.588267	0.0908031	-0.369034	0.324692	-0.583774	0.0703738
7	D	Y	1	1	1	FALSE	8316	0.0305502	0.126729	0.0976188	0.108659	0.585291	0.338991	0.0980539	0.0801502
7	D	C	2	1	1	FALSE	61	-1.37695	0.881812	-0.0480238	1.23777	NA	NA	-0.929543	0.718193
7	D	F	2	1	1	FALSE	65	-0.866126	0.866597	NA	NA	NA	NA	-0.866126	0.866597
6	H	P	2	1	1	FALSE	3614.67	NA	NA	-0.330604	0.145922	NA	NA	-0.330604	0.145922
6	H	R	2	1	1	FALSE	28394.3	0.143616	0.109604	0.0998859	0.0769892	0.155923	0.284302	0.116281	0.0615079
6	H	L	2	1	1	FALSE	28545	-1.2609	0.105986	-1.39865	0.0770455	-0.596439	0.289003	-1.3175	0.060919
6	H	E	2	1	1	FALSE	57.5	-3.8996	1.36055	-0.825808	1.20915	NA	NA	-2.18223	0.903803
6	H	D	1	1	1	FALSE	4636.67	-0.833621	0.140124	-0.580119	0.133298	-0.338655	0.368424	-0.677276	0.0934225
6	H	*	2	1	1	TRUE	106	-3.46596	0.881633	-3.73258	1.17374	NA	NA	-3.56213	0.704924
6	H	Y	2	1	1	FALSE	14248	-0.36061	0.117215	-0.341598	0.0911044	NA	NA	-0.348758	0.0719322
6	H	C	2	1	1	FALSE	141	-0.851324	0.658025	-1.23747	0.737267	NA	NA	-1.02254	0.490928
6	H	F	2	1	1	FALSE	96.5	-1.83021	0.841759	-0.756119	0.869305	NA	NA	-1.31045	0.604717
5	R	L	1	1	1	FALSE	20995.3	-0.963169	0.110067	-0.907334	0.0828505	-0.393747	0.30636	-0.903721	0.0647007
5	R	G	1	1	1	FALSE	4586.67	-0.75504	0.140974	-0.390263	0.134628	-0.451408	0.359907	-0.55656	0.0939843
5	R	*	2	1	1	TRUE	13506.7	-2.80896	0.123373	NA	NA	NA	NA	-2.80896	0.123373
5	R	W	2	1	1	FALSE	133.5	-0.324678	0.577534	-0.434444	0.854303	NA	NA	-0.359108	0.47846
5	R	C	2	1	1	FALSE	138	-0.366852	0.690996	-2.30639	0.760045	NA	NA	-1.24453	0.51128
3	E	A	2	1	1	FALSE	2991.67	0.193964	0.151901	NA	NA	NA	NA	0.193964	0.151901
3	E	G	2	1	1	FALSE	15764	0.356515	0.11704	0.37608	0.0889921	NA	NA	0.368913	0.0708399
3	E	V	2	1	1	FALSE	25133	-0.995955	0.115248	-0.835597	0.0815771	NA	NA	-0.889124	0.0665844
3	E	*	1	1	1	TRUE	9449.33	-3.06159	0.134292	-2.17304	0.111233	-3.23221	0.328685	-2.57896	0.0828943
3	E	Y	2	1	1	FALSE	67	0.241402	0.838455	NA	NA	NA	NA	0.241402	0.838455
3	E	W	2	1	1	FALSE	199.5	-0.300331	0.510084	-0.460202	0.649936	NA	NA	-0.361269	0.401262
3	E	L	2	1	1	FALSE	69	-2.43997	0.923004	NA	NA	NA	NA	-2.43997	0.923004
2	A	G	1	1	1	FALSE	3779.67	-0.0876244	0.145186	-0.041133	0.146408	0.336843	0.369555	-0.0355912	0.0993
2	A	V	1	1	1	FALSE	17703.3	-1.28743	0.106959	-1.28266	0.0854734	-1.12951	0.266947	-1.27539	0.0647764
2	A	S	1	1	1	FALSE	12079.3	-0.0844158	0.118143	-0.263283	0.0949707	0.206989	0.311581	-0.171699	0.0720156
2	A	L	2	1	1	FALSE	71	-2.2132	0.814829	-0.110533	1.23849	NA	NA	-1.57799	0.680713
1	D	A	2	1	1	FALSE	3162	NA	NA	0.051463	0.153867	NA	NA	0.051463	0.153867
1	D	G	2	1	1	FALSE	41527.3	0.327763	0.102569	0.374924	0.0717278	0.597366	0.270281	0.370181	0.0574381
1	D	V	2	1	1	FALSE	53339.3	-1.7521	0.102672	-1.70411	0.0700148	-1.39133	0.270527	-1.705	0.0565665
1	D	*	2	1	1	TRUE	76	-2.27774	0.772118	-2.85667	1.41095	NA	NA	-2.41115	0.677332
1	D	Y	2	1	1	FALSE	10956.7	-0.35793	0.121014	-0.301381	0.0986507	NA	NA	-0.323957	0.0764632
1	D	C	2	1	1	FALSE	161.667	0.139971	0.480395	-0.0373317	0.64391	-0.000493525	0.993911	0.066515	0.359042
1	D	F	2	1	1	FALSE	74	0.0893853	0.789317	0.785187	1.09606	NA	NA	0.327003	0.640515

## Sheet: 2 aa changes
Pos2	Mut2	Pos1	Mut1	WT_AA1	WT_AA2	Nham_nt	Nham_aa	Nmut_codons	STOP	mean_count	nscore1	sigma1	nscore2	sigma2	nscore3	sigma3	nscore	sigma
2	E	1	E	D	A	2	2	2	FALSE	78.5	0.160562	0.878728	-1.90834	0.999612	NA	NA	-0.741292	0.659978
2	E	1	G	D	A	2	2	2	FALSE	139.5	-0.461932	0.679144	-0.616485	0.71507	NA	NA	-0.535229	0.492438
2	E	1	N	D	A	2	2	2	FALSE	146	0.143146	0.53071	-0.181673	0.855333	NA	NA	0.052856	0.450957
2	E	1	V	D	A	2	2	2	FALSE	133.333	-0.526572	0.551242	-1.42757	0.708833	-0.423844	1.05309	-0.801619	0.402165
2	E	1	Y	D	A	2	2	2	FALSE	62	-0.288245	0.876578	NA	NA	NA	NA	-0.288245	0.876578
2	G	1	V	D	A	2	2	2	FALSE	145	-0.786083	0.535612	0.445978	0.865725	NA	NA	-0.44503	0.455486
2	P	1	E	D	A	2	2	2	FALSE	89	-0.332609	0.630008	0.879441	1.24193	NA	NA	-0.0845434	0.56185
2	P	1	G	D	A	2	2	2	FALSE	91	0.344964	0.720987	NA	NA	NA	NA	0.344964	0.720987
2	P	1	V	D	A	2	2	2	FALSE	55	NA	NA	-0.650592	1.26932	NA	NA	-0.650592	1.26932
2	P	1	Y	D	A	2	2	2	FALSE	64	-0.891444	0.873829	NA	NA	NA	NA	-0.891444	0.873829
2	S	1	E	D	A	2	2	2	FALSE	187.333	0.128205	0.453096	-0.124617	0.595098	0.306145	0.916073	0.0717296	0.335458
2	S	1	G	D	A	2	2	2	FALSE	117	1.10217	0.778997	-0.688131	0.753383	NA	NA	0.177102	0.541551
2	S	1	N	D	A	2	2	2	FALSE	94	0.640358	0.752591	0.375822	0.91009	NA	NA	0.532926	0.579976
2	S	1	V	D	A	2	2	2	FALSE	123.5	-0.614018	0.704437	-1.91265	0.803389	NA	NA	-1.17848	0.529662
2	T	1	E	D	A	2	2	2	FALSE	212.333	0.236331	0.494608	-0.1585	0.504594	-0.256614	0.833953	-0.00269096	0.325248
2	T	1	G	D	A	2	2	2	FALSE	200	-0.0273057	0.418046	-0.866373	0.61621	0.77777	0.893654	-0.152376	0.322618
2	T	1	N	D	A	2	2	2	FALSE	170	0.529337	0.504488	0.0425617	0.763959	NA	NA	0.381524	0.420981
2	T	1	V	D	A	2	2	2	FALSE	240.333	-1.52005	0.427672	-2.07197	0.535478	-0.108281	0.871843	-1.52663	0.312036
2	T	1	Y	D	A	2	2	2	FALSE	62	NA	NA	-0.842167	1.19976	NA	NA	-0.842167	1.19976
2	V	1	E	D	A	2	2	2	FALSE	241	-1.91237	0.398875	-1.41417	0.598106	-1.71433	0.799489	-1.75244	0.306495
2	V	1	G	D	A	2	2	2	FALSE	294	-0.577582	0.371004	-0.768342	0.488483	-0.393173	0.725435	-0.611202	0.273627
2	V	1	N	D	A	2	2	2	FALSE	173	-0.650768	0.504454	-1.07117	0.7766	NA	NA	-0.775517	0.42304
2	V	1	V	D	A	2	2	2	FALSE	221.667	-4.15502	0.695138	-5.20565	1.00811	-2.1164	0.943081	-3.85382	0.489245
2	V	1	Y	D	A	2	2	2	FALSE	94.5	-3.5305	0.866156	-3.69099	1.37136	NA	NA	-3.57627	0.732316
3	*	1	E	D	E	2	2	2	TRUE	130	-3.21056	0.77854	-3.42554	0.975647	NA	NA	-3.29419	0.608539
3	*	1	G	D	E	2	2	2	TRUE	120	-1.94243	0.579176	0.160779	0.835657	-4.03336	1.16703	-1.65557	0.440765
3	*	1	N	D	E	2	2	2	TRUE	67	NA	NA	-3.2616	1.36195	NA	NA	-3.2616	1.36195
3	*	1	V	D	E	2	2	2	TRUE	126.667	-4.20926	0.811147	-3.7928	1.03235	-3.55864	1.22454	-3.94537	0.565681
3	*	2	T	A	E	2	2	2	TRUE	67.5	-2.64064	0.944586	-4.64118	1.89677	NA	NA	-3.03819	0.84554
3	*	2	V	A	E	2	2	2	TRUE	89.5	-4.56458	1.20097	-3.36158	1.31687	NA	NA	-4.01834	0.887366
3	A	1	E	D	E	2	2	2	FALSE	87	0.0240802	0.739279	NA	NA	NA	NA	0.0240802	0.739279
3	D	1	E	D	E	2	2	2	FALSE	53	0.872684	0.937007	NA	NA	NA	NA	0.872684	0.937007
3	D	1	G	D	E	2	2	2	FALSE	120.5	-0.625538	0.509263	0.868923	1.27656	NA	NA	-0.420352	0.473013
3	D	1	N	D	E	2	2	2	FALSE	77	-0.404273	0.789529	NA	NA	NA	NA	-0.404273	0.789529
3	D	1	V	D	E	2	2	2	FALSE	215	-0.971063	0.470738	-1.0879	0.666971	NA	NA	-1.00991	0.384595
3	D	2	T	A	E	2	2	2	FALSE	98	NA	NA	-5.03889	1.78173	NA	NA	-5.03889	1.78173
3	D	2	V	A	E	2	2	2	FALSE	74	NA	NA	-3.65101	1.38768	NA	NA	-3.65101	1.38768
3	G	1	E	D	E	2	2	2	FALSE	160	0.668757	0.518601	-0.151352	0.600872	0.804781	1.03061	0.380254	0.366879
3	G	1	G	D	E	2	2	2	FALSE	143.333	0.787209	0.546878	0.654383	0.630828	1.17996	1.07493	0.78812	0.385701
3	G	1	N	D	E	2	2	2	FALSE	106	0.23923	0.600074	1.77165	1.04392	NA	NA	0.619824	0.520247
3	G	1	V	D	E	2	2	2	FALSE	196.5	-0.902026	0.51505	-0.411335	0.660528	NA	NA	-0.716488	0.406167
3	G	2	S	A	E	2	2	2	FALSE	75	NA	NA	-0.875091	1.09184	NA	NA	-0.875091	1.09184
3	G	2	T	A	E	2	2	2	FALSE	78.3333	0.862575	0.881489	-0.0735619	0.884274	-0.240449	0.98078	0.212476	0.526651
3	G	2	V	A	E	2	2	2	FALSE	118.5	-2.29184	0.696075	-2.21182	0.918453	NA	NA	-2.26265	0.554755
3	K	1	E	D	E	2	2	2	FALSE	142.333	0.536602	0.529023	1.01228	0.683089	0.515022	0.938726	0.681826	0.382051
3	K	1	G	D	E	2	2	2	FALSE	83	0.5037	0.791617	0.7907	0.975325	NA	NA	0.61768	0.614642
3	K	1	N	D	E	2	2	2	FALSE	64.5	1.119	0.963304	-0.251192	1.05401	NA	NA	0.495394	0.711069
3	K	1	V	D	E	2	2	2	FALSE	134.5	-3.13746	0.756394	-2.76399	0.875256	NA	NA	-2.97779	0.572297
3	K	2	E	A	E	2	2	2	FALSE	61.5	-0.67787	0.831771	0.000637699	1.28297	NA	NA	-0.477078	0.697929
3	K	2	S	A	E	2	2	2	FALSE	66	-0.339069	0.850702	NA	NA	NA	NA	-0.339069	0.850702
3	K	2	T	A	E	2	2	2	FALSE	59	NA	NA	-0.0706704	1.21691	NA	NA	-0.0706704	1.21691
3	K	2	V	A	E	2	2	2	FALSE	66	NA	NA	-1.06425	1.16851	NA	NA	-1.06425	1.16851
3	V	1	E	D	E	2	2	2	FALSE	274.333	-1.80481	0.36162	-1.39594	0.563584	-0.609236	0.786401	-1.54535	0.283839
3	V	1	G	D	E	2	2	2	FALSE	198.667	-1.64796	0.424359	-2.63179	0.72036	-2.54519	0.900293	-1.99257	0.338761
3	V	1	N	D	E	2	2	2	FALSE	144	-1.12466	0.615538	-2.59222	0.826614	NA	NA	-1.64815	0.493695
3	V	1	V	D	E	2	2	2	FALSE	236	-3.92945	0.584668	-3.97386	0.733926	-3.65931	0.954273	-3.89302	0.412393
3	V	1	Y	D	E	2	2	2	FALSE	61	NA	NA	-2.24536	1.27898	NA	NA	-2.24536	1.27898
3	V	2	E	A	E	2	2	2	FALSE	75	-0.260817	0.737867	-0.817923	1.1992	NA	NA	-0.413811	0.628435
3	V	2	P	A	E	2	2	2	FALSE	66	NA	NA	-0.0387007	1.15041	NA	NA	-0.0387007	1.15041
3	V	2	S	A	E	2	2	2	FALSE	104	-0.575591	0.680604	-1.13326	0.937698	NA	NA	-0.768013	0.550808
3	V	2	T	A	E	2	2	2	FALSE	124.667	-0.416245	0.553453	0.347226	0.754852	-0.160108	0.994704	-0.151125	0.40722
3	V	2	V	A	E	2	2	2	FALSE	95.5	-0.672081	0.678836	-4.89571	1.81881	NA	NA	-1.1885	0.635983
4	C	1	G	D	F	2	2	2	FALSE	51	0.15576	0.95985	NA	NA	NA	NA	0.15576	0.95985
4	I	1	E	D	F	2	2	2	FALSE	198.333	-1.0594	0.467672	-0.479895	0.538816	-0.796991	1.05654	-0.809059	0.334968
4	I	1	G	D	F	2	2	2	FALSE	221	0.285732	0.410821	0.651946	0.551872	0.1893	0.87542	0.388135	0.308411
4	I	1	H	D	F	2	2	2	FALSE	103	-0.784144	0.690182	NA	NA	NA	NA	-0.784144	0.690182
4	I	1	N	D	F	2	2	2	FALSE	95.5	0.710077	0.71159	-0.489657	0.949508	NA	NA	0.278594	0.569427
4	I	1	V	D	F	2	2	2	FALSE	204.333	-1.85652	0.451651	-0.772562	0.594396	-3.1668	0.944134	-1.67604	0.336061
4	I	1	Y	D	F	2	2	2	FALSE	96	-2.15604	0.810818	-1.77486	0.940875	NA	NA	-1.9936	0.614212
4	I	2	E	A	F	2	2	2	FALSE	77.5	-1.06865	0.797045	-0.764609	1.07536	NA	NA	-0.960846	0.640335
4	I	2	S	A	F	2	2	2	FALSE	141	NA	NA	-4.01019	1.08854	NA	NA	-4.01019	1.08854
4	I	2	T	A	F	2	2	2	FALSE	171	-1.19556	0.582191	-0.447276	0.679342	NA	NA	-0.878702	0.442065
4	I	2	V	A	F	2	2	2	FALSE	108	-2.13431	0.647982	-2.41708	0.913436	-2.92827	1.03399	-2.37382	0.470596
4	I	3	*	E	F	2	2	2	TRUE	73	NA	NA	-4.7426	1.86373	NA	NA	-4.7426	1.86373
4	I	3	D	E	F	2	2	2	FALSE	130	NA	NA	-2.74985	0.940095	NA	NA	-2.74985	0.940095
4	I	3	G	E	F	2	2	2	FALSE	73	0.39641	0.702116	0.162193	1.09226	0.875971	1.08527	0.453152	0.518772
4	I	3	K	E	F	2	2	2	FALSE	56	-0.366434	0.922794	-1.16004	1.27134	NA	NA	-0.640273	0.746803
4	I	3	V	E	F	2	2	2	FALSE	191.333	-2.88387	0.617248	-3.37843	0.65695	-2.74711	0.864785	-3.03725	0.399078
4	L	1	E	D	F	2	2	2	FALSE	424.333	-0.56459	0.304238	-1.03589	0.405144	-0.0375763	0.607605	-0.638233	0.22585
4	L	1	G	D	F	2	2	2	FALSE	296.667	-0.555111	0.381332	-1.27881	0.441003	NA	NA	-0.864721	0.28845
4	L	1	N	D	F	2	2	2	FALSE	346.5	-1.20393	0.345099	-0.0411024	0.584982	NA	NA	-0.903723	0.297232
4	L	1	V	D	F	2	2	2	FALSE	380.333	-3.13231	0.407983	-3.63461	0.505408	-1.44752	0.678736	-2.9925	0.287559
4	L	1	Y	D	F	2	2	2	FALSE	176	NA	NA	-1.51925	0.725992	NA	NA	-1.51925	0.725992
4	L	2	E	A	F	2	2	2	FALSE	242	NA	NA	-2.24379	0.668542	NA	NA	-2.24379	0.668542
4	L	2	P	A	F	2	2	2	FALSE	51	NA	NA	-0.332001	1.31224	NA	NA	-0.332001	1.31224
4	L	2	S	A	F	2	2	2	FALSE	71	-2.56386	0.922779	-0.701452	1.1185	NA	NA	-1.8096	0.711803
4	L	2	T	A	F	2	2	2	FALSE	224.333	-2.32029	0.457527	-1.55044	0.560268	NA	NA	-2.0123	0.354377
4	L	2	V	A	F	2	2	2	FALSE	151	-3.16951	0.635461	-3.9893	0.896977	-3.56159	1.12381	-3.4642	0.470824
4	L	3	*	E	F	2	2	2	TRUE	76	NA	NA	-4.08576	1.50938	NA	NA	-4.08576	1.50938
4	L	3	D	E	F	2	2	2	FALSE	109.5	-0.739921	0.616826	NA	NA	NA	NA	-0.739921	0.616826
4	L	3	G	E	F	2	2	2	FALSE	191	-0.0389766	0.508499	-0.133982	0.668554	NA	NA	-0.0737951	0.404732
4	L	3	K	E	F	2	2	2	FALSE	179	NA	NA	-0.581357	0.703601	NA	NA	-0.581357	0.703601
4	L	3	V	E	F	2	2	2	FALSE	197	-3.20708	0.550381	-2.22774	0.625693	NA	NA	-2.77987	0.413254
4	S	1	E	D	F	2	2	2	FALSE	373	-0.402816	0.3295	-0.996362	0.419172	-0.0590576	0.728878	-0.565529	0.244089
4	S	1	G	D	F	2	2	2	FALSE	337	0.0640675	0.342862	0.000415381	0.445543	0.13823	0.730706	0.0522785	0.254682
4	S	1	H	D	F	2	2	2	FALSE	51	NA	NA	-1.72671	1.35833	NA	NA	-1.72671	1.35833
4	S	1	N	D	F	2	2	2	FALSE	178.5	0.0211771	0.517212	-0.636322	0.713261	NA	NA	-0.205408	0.418713
4	S	1	V	D	F	2	2	2	FALSE	290	-0.778856	0.368559	-0.446369	0.472167	0.444012	0.865432	-0.541867	0.275424
4	S	1	Y	D	F	2	2	2	FALSE	120.5	0.797131	0.630842	-0.0292237	0.847105	NA	NA	0.502337	0.505957
4	S	2	E	A	F	2	2	2	FALSE	136.5	-1.52397	0.63726	-2.47073	0.845357	NA	NA	-1.86703	0.50887
4	S	2	G	A	F	2	2	2	FALSE	75.5	-0.931449	0.849094	0.741842	1.02127	NA	NA	-0.247544	0.652909
4	S	2	S	A	F	2	2	2	FALSE	85	-0.325048	0.755594	0.57232	1.00413	NA	NA	-0.000626055	0.603754
4	S	2	T	A	F	2	2	2	FALSE	142.5	-0.347042	0.627662	-1.73741	0.764203	NA	NA	-0.907133	0.485035
4	S	2	V	A	F	2	2	2	FALSE	199	-1.65358	0.45679	-0.426094	0.583364	-1.01335	0.908226	-1.16349	0.334388
4	S	3	*	E	F	2	2	2	TRUE	94	-2.06416	0.988394	-3.71933	1.05422	NA	NA	-2.83846	0.721048
4	S	3	A	E	F	2	2	2	FALSE	75.5	-0.283093	0.764068	-1.16817	1.14588	NA	NA	-0.555497	0.635706
4	S	3	D	E	F	2	2	2	FALSE	102.5	-1.73438	0.646867	0.500905	1.05456	NA	NA	-1.12327	0.551398
4	S	3	G	E	F	2	2	2	FALSE	135	0.301739	0.487402	0.89792	0.786862	0.413535	0.999816	0.459211	0.382782
4	S	3	K	E	F	2	2	2	FALSE	98	-0.248559	0.837145	-0.266527	0.829063	NA	NA	-0.25763	0.589073
4	S	3	V	E	F	2	2	2	FALSE	243	-2.79751	0.482326	-1.44764	0.59203	-1.57262	0.644645	-2.08619	0.323458
4	Y	1	E	D	F	2	2	2	FALSE	268.667	0.00810268	0.430008	0.0694473	0.463037	-0.323394	0.729861	-0.0200308	0.289285
4	Y	1	G	D	F	2	2	2	FALSE	232.333	0.479152	0.39449	0.447841	0.582285	0.748194	0.744576	0.514302	0.299088
4	Y	1	N	D	F	2	2	2	FALSE	212	-0.0519688	0.473006	0.556983	0.653694	NA	NA	0.157298	0.383207
4	Y	1	V	D	F	2	2	2	FALSE	411.667	-1.74542	0.355761	-0.97743	0.384617	-1.13862	0.660995	-1.35719	0.242895
4	Y	1	Y	D	F	2	2	2	FALSE	52	0.218003	0.959274	0.691763	1.27746	NA	NA	0.388825	0.76708
4	Y	2	E	A	F	2	2	2	FALSE	111	-1.16124	0.655848	-0.407111	0.916448	NA	NA	-0.905829	0.533343
4	Y	2	S	A	F	2	2	2	FALSE	75.3333	-0.494063	0.834547	-2.70539	1.00976	-0.929406	1.08622	-1.27153	0.553499
4	Y	2	T	A	F	2	2	2	FALSE	143	-0.558092	0.482918	0.233763	0.729803	0.475595	1.07645	-0.219642	0.377197
4	Y	2	V	A	F	2	2	2	FALSE	134	-1.03695	0.625314	-0.621057	0.679284	-3.03309	0.957639	-1.25627	0.41469
4	Y	3	*	E	F	2	2	2	TRUE	113.5	-3.88467	0.867563	-3.89169	1.29604	NA	NA	-3.88684	0.720947
4	Y	3	D	E	F	2	2	2	FALSE	75	-1.9475	0.767487	-0.497987	1.23332	NA	NA	-1.54287	0.651619
4	Y	3	G	E	F	2	2	2	FALSE	162.5	0.538213	0.527552	-0.000670586	0.759224	NA	NA	0.362746	0.433232
4	Y	3	K	E	F	2	2	2	FALSE	117	0.0669125	0.596764	0.940274	0.934741	NA	NA	0.319808	0.502996
4	Y	3	V	E	F	2	2	2	FALSE	117	-0.735225	0.598115	-1.0257	0.783598	-1.15027	0.96899	-0.901941	0.426831
5	*	1	E	D	R	2	2	2	TRUE	219	-2.89474	0.515276	-2.93166	0.793445	NA	NA	-2.90569	0.432145
5	*	1	G	D	R	2	2	2	TRUE	135	-2.37952	0.68807	-2.85943	0.875448	NA	NA	-2.56278	0.540976
5	*	1	N	D	R	2	2	2	TRUE	128.5	-2.36377	0.790754	-2.9764	0.83792	NA	NA	-2.65236	0.575099
5	*	1	V	D	R	2	2	2	TRUE	162.5	-4.70365	0.963367	-4.3208	1.16781	NA	NA	-4.54861	0.743139
5	*	2	E	A	R	2	2	2	TRUE	85.5	-4.53559	1.20626	-4.6859	1.88186	NA	NA	-4.57936	1.01554
5	*	2	S	A	R	2	2	2	TRUE	64	-4.76264	1.64839	NA	NA	NA	NA	-4.76264	1.64839
5	*	2	T	A	R	2	2	2	TRUE	64	NA	NA	-2.99102	1.34159	NA	NA	-2.99102	1.34159
5	*	2	V	A	R	2	2	2	TRUE	125.5	-3.64828	0.839728	-5.28372	1.72802	NA	NA	-3.96071	0.755273
5	*	3	G	E	R	2	2	2	TRUE	91.5	-2.56987	0.78032	-3.06912	1.19051	NA	NA	-2.7199	0.652625
5	*	3	K	E	R	2	2	2	TRUE	66.5	-4.9345	1.61402	-2.87448	1.40142	NA	NA	-3.75997	1.05819
5	*	3	V	E	R	2	2	2	TRUE	109	-2.80099	0.773944	-4.41414	1.14505	-4.16318	1.28665	-3.47722	0.573896
5	*	4	I	F	R	2	2	2	TRUE	92	-2.9163	0.813268	-3.76648	1.34176	NA	NA	-3.14472	0.695487
5	*	4	L	F	R	2	2	2	TRUE	186.5	-2.07282	0.582224	-4.70001	1.08446	NA	NA	-2.66065	0.51297
5	*	4	S	F	R	2	2	2	TRUE	184	-4.47496	0.996287	-3.91287	0.844941	NA	NA	-4.14802	0.644401
5	*	4	Y	F	R	2	2	2	TRUE	183	-3.56559	0.703424	-3.30305	0.811289	NA	NA	-3.45292	0.53147
5	G	1	G	D	R	2	2	2	FALSE	68	NA	NA	-1.47387	1.16507	NA	NA	-1.47387	1.16507
5	G	1	V	D	R	2	2	2	FALSE	73	-0.543137	0.866805	-3.05693	1.19578	NA	NA	-1.40904	0.701812
5	G	3	G	E	R	2	2	2	FALSE	74	NA	NA	-1.09662	1.10459	NA	NA	-1.09662	1.10459
5	L	1	E	D	R	2	2	2	FALSE	197	-0.39752	0.524303	-0.932252	0.647535	NA	NA	-0.609268	0.407479
5	L	1	G	D	R	2	2	2	FALSE	132.667	0.510706	0.572444	-2.2698	0.709418	0.0440726	1.06857	-0.49252	0.411191
5	L	1	N	D	R	2	2	2	FALSE	158	-0.0505632	0.599704	-0.24451	0.695917	NA	NA	-0.133213	0.454294
5	L	1	V	D	R	2	2	2	FALSE	201.667	-2.40426	0.511893	-2.00685	0.563388	-0.395427	0.954983	-1.97581	0.352162
5	L	1	Y	D	R	2	2	2	FALSE	61	-0.885994	0.894598	NA	NA	NA	NA	-0.885994	0.894598
5	L	2	E	A	R	2	2	2	FALSE	74	-0.902255	0.887857	-2.05707	1.06468	NA	NA	-1.37593	0.681875
5	L	2	T	A	R	2	2	2	FALSE	92.5	-0.513248	0.713786	-1.79869	1.02668	NA	NA	-0.93211	0.586065
5	L	2	V	A	R	2	2	2	FALSE	159	-2.3252	0.62193	-3.48309	0.896226	NA	NA	-2.70156	0.510954
5	L	3	*	E	R	2	2	2	TRUE	63	-3.82264	1.13266	NA	NA	NA	NA	-3.82264	1.13266
5	L	3	D	E	R	2	2	2	FALSE	116	-1.55069	0.669361	NA	NA	NA	NA	-1.55069	0.669361
5	L	3	G	E	R	2	2	2	FALSE	101.5	-0.42144	0.752425	-0.48762	0.865655	NA	NA	-0.449922	0.567888
5	L	3	K	E	R	2	2	2	FALSE	58	-2.46698	1.00854	NA	NA	NA	NA	-2.46698	1.00854
5	L	3	V	E	R	2	2	2	FALSE	125	-1.28065	0.645461	-2.26711	0.733344	-2.76661	1.02819	-1.90303	0.438291
5	L	4	I	F	R	2	2	2	FALSE	124.5	-2.16441	0.749264	-3.65778	0.980226	NA	NA	-2.71516	0.595278
5	L	4	L	F	R	2	2	2	FALSE	299	-2.54433	0.451675	-2.60329	0.620881	NA	NA	-2.56474	0.365251
5	L	4	S	F	R	2	2	2	FALSE	167	-2.20819	0.538692	-0.313409	0.807834	NA	NA	-1.62498	0.448184
5	L	4	V	F	R	2	2	2	FALSE	72	-1.19155	0.832463	NA	NA	NA	NA	-1.19155	0.832463
5	L	4	Y	F	R	2	2	2	FALSE	127.667	-0.738293	0.587962	-1.25779	0.72085	-0.812038	0.97831	-0.921986	0.413026
5	P	1	G	D	R	2	2	2	FALSE	62	NA	NA	-2.36772	1.28012	NA	NA	-2.36772	1.28012
5	P	1	N	D	R	2	2	2	FALSE	60	NA	NA	-1.63738	1.24781	NA	NA	-1.63738	1.24781
5	P	1	V	D	R	2	2	2	FALSE	83	NA	NA	-1.96384	1.07796	NA	NA	-1.96384	1.07796
5	P	2	V	A	R	2	2	2	FALSE	105.5	-3.27791	0.931032	-1.99776	0.884289	NA	NA	-2.6049	0.641175
5	P	4	L	F	R	2	2	2	FALSE	73	NA	NA	-0.333971	1.09737	NA	NA	-0.333971	1.09737
5	Q	1	E	D	R	2	2	2	FALSE	210.333	-1.3121	0.366409	0.415411	0.686673	-0.661013	1.08312	-0.907302	0.309764
5	Q	1	G	D	R	2	2	2	FALSE	194	0.309471	0.434112	-0.161832	0.590641	0.551508	0.951045	0.192706	0.328293
5	Q	1	N	D	R	2	2	2	FALSE	126	0.401257	0.69855	-0.174698	0.753108	NA	NA	0.134895	0.512152
5	Q	1	V	D	R	2	2	2	FALSE	216.5	-2.23122	0.510066	-1.00978	0.657789	NA	NA	-1.77257	0.403081
5	Q	1	Y	D	R	2	2	2	FALSE	101	NA	NA	-0.660603	0.937757	NA	NA	-0.660603	0.937757
5	Q	2	E	A	R	2	2	2	FALSE	101	-1.94265	0.72598	-2.63666	1.03763	NA	NA	-2.17073	0.594844
5	Q	2	T	A	R	2	2	2	FALSE	118	-0.756525	0.640327	-0.358998	0.8716	NA	NA	-0.617179	0.516037
5	Q	2	V	A	R	2	2	2	FALSE	117	-0.239424	0.725647	-2.40515	0.846659	NA	NA	-1.15658	0.550972
5	Q	3	D	E	R	2	2	2	FALSE	80	-2.50088	0.863865	NA	NA	NA	NA	-2.50088	0.863865
5	Q	3	G	E	R	2	2	2	FALSE	100	-0.298901	0.690255	-1.31299	0.961155	NA	NA	-0.643953	0.560657
5	Q	3	K	E	R	2	2	2	FALSE	65	NA	NA	1.00285	1.15249	NA	NA	1.00285	1.15249
5	Q	3	V	E	R	2	2	2	FALSE	150	-2.7176	0.557934	-1.73502	0.704135	-0.660263	1.07351	-2.09976	0.404985
5	Q	4	I	F	R	2	2	2	FALSE	192	-1.40045	0.648626	-0.465246	0.582561	NA	NA	-0.882809	0.433413
5	Q	4	L	F	R	2	2	2	FALSE	357.5	-1.92694	0.412767	-1.19779	0.499115	NA	NA	-1.6308	0.318085
5	Q	4	S	F	R	2	2	2	FALSE	201	-1.24838	0.532936	-1.39931	0.646669	NA	NA	-1.30943	0.411269
5	Q	4	Y	F	R	2	2	2	FALSE	114	-0.53801	0.686505	-2.49503	0.778163	-0.846751	0.958748	-1.27194	0.453555
6	D	1	E	D	H	2	2	2	FALSE	80	-0.427305	0.915725	-1.89161	0.964349	NA	NA	-1.12161	0.66404
6	D	1	G	D	H	2	2	2	FALSE	84	1.3756	0.745808	NA	NA	NA	NA	1.3756	0.745808
6	D	1	V	D	H	2	2	2	FALSE	56	NA	NA	-2.85667	1.41095	NA	NA	-2.85667	1.41095
6	D	3	V	E	H	2	2	2	FALSE	53	NA	NA	-1.06806	1.30373	NA	NA	-1.06806	1.30373
6	D	4	I	F	H	2	2	2	FALSE	75	-1.31033	0.819629	NA	NA	NA	NA	-1.31033	0.819629
6	D	4	L	F	H	2	2	2	FALSE	53	NA	NA	-2.61785	1.41444	NA	NA	-2.61785	1.41444
6	D	4	Y	F	H	2	2	2	FALSE	88	-1.51	0.721705	-1.21934	1.08641	NA	NA	-1.42101	0.601149
6	D	5	L	R	H	2	2	2	FALSE	66	NA	NA	-3.5359	1.43727	NA	NA	-3.5359	1.43727
6	L	1	E	D	H	2	2	2	FALSE	219.333	-1.19634	0.423512	-1.01121	0.541265	-1.26816	1.04579	-1.13916	0.317773
6	L	1	G	D	H	2	2	2	FALSE	274.5	-1.4607	0.438547	-1.67906	0.590659	NA	NA	-1.5383	0.352106
6	L	1	N	D	H	2	2	2	FALSE	171	-1.13552	0.536542	-0.577124	0.733732	NA	NA	-0.940965	0.4331
6	L	1	V	D	H	2	2	2	FALSE	266.333	-2.51708	0.435367	-4.22816	0.690084	-2.62281	0.972958	-2.95644	0.344377
6	L	1	Y	D	H	2	2	2	FALSE	84.5	-2.13223	0.818724	-3.10485	1.17532	NA	NA	-2.45	0.671797
6	L	2	E	A	H	2	2	2	FALSE	67	-1.06985	0.982526	-4.1744	1.4776	NA	NA	-2.02168	0.81816
6	L	2	S	A	H	2	2	2	FALSE	100	-2.14421	0.668214	0.156156	1.08493	NA	NA	-1.51157	0.568957
6	L	2	T	A	H	2	2	2	FALSE	171.5	-1.66666	0.567775	-1.43961	0.720884	NA	NA	-1.57973	0.446041
6	L	2	V	A	H	2	2	2	FALSE	191.333	-2.6991	0.454381	-1.83123	0.701829	-2.79297	1.05224	-2.48344	0.358589
6	L	3	*	E	H	2	2	2	TRUE	78	-3.53762	0.945742	-4.57828	1.91869	NA	NA	-3.74104	0.848289
6	L	3	A	E	H	2	2	2	FALSE	70	NA	NA	-1.34795	1.14358	NA	NA	-1.34795	1.14358
6	L	3	D	E	H	2	2	2	FALSE	71.5	-1.34136	0.742462	-0.296696	1.3117	NA	NA	-1.08787	0.646134
6	L	3	G	E	H	2	2	2	FALSE	178	-1.25609	0.518254	-0.986045	0.741477	NA	NA	-1.16746	0.42478
6	L	3	K	E	H	2	2	2	FALSE	101.5	-2.49251	0.710403	-0.145689	1.02115	NA	NA	-1.72713	0.583164
6	L	3	V	E	H	2	2	2	FALSE	197.333	-3.14274	0.527065	-3.22724	0.691132	-1.50903	0.968678	-2.91132	0.384644
6	L	4	I	F	H	2	2	2	FALSE	141	-0.954123	0.499762	-0.326285	0.735736	-1.22027	1.03656	-0.819625	0.383994
6	L	4	L	F	H	2	2	2	FALSE	242	-2.85403	0.43164	-1.86108	0.554357	-2.64863	1.15873	-2.49272	0.326753
6	L	4	S	F	H	2	2	2	FALSE	186.333	-0.839542	0.480611	-0.953933	0.58197	-1.29825	0.9285	-0.94258	0.344179
6	L	4	Y	F	H	2	2	2	FALSE	261	-1.24918	0.480447	-2.1046	0.576907	NA	NA	-1.5995	0.369187
6	L	5	*	R	H	2	2	2	TRUE	133	-4.51578	0.989931	-5.20854	1.74331	NA	NA	-4.6847	0.860827
6	L	5	G	R	H	2	2	2	FALSE	71.5	-2.42831	0.795993	0.822709	1.31444	NA	NA	-1.55599	0.680878
6	L	5	L	R	H	2	2	2	FALSE	125.5	-3.21567	0.823566	-2.56159	0.860999	NA	NA	-2.90316	0.595143
6	L	5	Q	R	H	2	2	2	FALSE	247.5	-4.90105	0.815666	-3.55103	0.827446	NA	NA	-4.23572	0.580883
6	N	1	E	D	H	2	2	2	FALSE	59.5	-2.14421	0.994843	-1.80496	1.22682	NA	NA	-2.00962	0.772713
6	N	1	G	D	H	2	2	2	FALSE	62	0.159453	0.871732	NA	NA	NA	NA	0.159453	0.871732
6	N	1	V	D	H	2	2	2	FALSE	116	-1.00144	0.624643	-1.67683	0.950175	NA	NA	-1.20525	0.521957
6	N	4	L	F	H	2	2	2	FALSE	67.5	-0.732974	0.857259	-4.6859	1.88186	NA	NA	-1.4123	0.780128
6	N	4	Y	F	H	2	2	2	FALSE	85	NA	NA	-1.57987	1.04651	NA	NA	-1.57987	1.04651
6	P	1	E	D	H	2	2	2	FALSE	57	NA	NA	0.379905	1.23389	NA	NA	0.379905	1.23389
6	P	1	G	D	H	2	2	2	FALSE	59	-1.09778	0.915209	NA	NA	NA	NA	-1.09778	0.915209
6	P	1	N	D	H	2	2	2	FALSE	54	0.871086	0.928417	NA	NA	NA	NA	0.871086	0.928417
6	P	1	V	D	H	2	2	2	FALSE	54	-3.84244	1.37862	-3.38841	1.50678	NA	NA	-3.63555	1.01713
6	P	2	S	A	H	2	2	2	FALSE	56	-4.62911	1.67887	NA	NA	NA	NA	-4.62911	1.67887
6	P	4	Y	F	H	2	2	2	FALSE	58	NA	NA	-1.49727	1.2623	NA	NA	-1.49727	1.2623
6	P	5	*	R	H	2	2	2	TRUE	62	-4.7309	1.65532	NA	NA	NA	NA	-4.7309	1.65532
6	Q	1	E	D	H	2	2	2	FALSE	271	-0.0726916	0.34664	-0.145432	0.5283	-0.122383	0.896314	-0.0972147	0.275764
6	Q	1	G	D	H	2	2	2	FALSE	215.333	0.121402	0.413384	0.285895	0.566791	0.518679	0.874528	0.221817	0.31201
6	Q	1	H	D	H	2	2	2	FALSE	86	-0.357629	0.747332	NA	NA	NA	NA	-0.357629	0.747332
6	Q	1	N	D	H	2	2	2	FALSE	216	0.00673504	0.485425	-0.187325	0.627481	NA	NA	-0.0659217	0.383946
6	Q	1	V	D	H	2	2	2	FALSE	363.333	-1.54852	0.333445	-1.72514	0.439366	-0.933719	0.842655	-1.55167	0.253327
6	Q	1	Y	D	H	2	2	2	FALSE	128	0.16779	0.58377	0.597199	0.868788	NA	NA	0.301361	0.484544
6	Q	2	E	A	H	2	2	2	FALSE	98	-0.822015	0.694124	-0.404913	0.968331	NA	NA	-0.680439	0.564154
6	Q	2	S	A	H	2	2	2	FALSE	123	-0.309159	0.668196	-0.583614	0.801921	NA	NA	-0.421626	0.513345
6	Q	2	T	A	H	2	2	2	FALSE	213.5	-0.238831	0.504565	-0.133447	0.61373	NA	NA	-0.196329	0.389757
6	Q	2	V	A	H	2	2	2	FALSE	172	-1.14433	0.529587	0.415644	0.733433	NA	NA	-0.609724	0.429357
6	Q	3	*	E	H	2	2	2	TRUE	76	-3.46596	1.07701	-4.16221	1.48185	NA	NA	-3.70662	0.87121
6	Q	3	D	E	H	2	2	2	FALSE	56	-0.62178	0.927213	1.04221	1.24126	NA	NA	-0.025818	0.74284
6	Q	3	G	E	H	2	2	2	FALSE	154.667	0.296	0.514499	0.124003	0.625762	0.03949	1.02474	0.20216	0.370528
6	Q	3	K	E	H	2	2	2	FALSE	164	-0.226286	0.556877	0.165914	0.715159	NA	NA	-0.0782437	0.439381
6	Q	3	V	E	H	2	2	2	FALSE	203.333	-1.55284	0.495095	-1.36034	0.568506	-2.84086	0.834217	-1.69861	0.340786
6	Q	4	C	F	H	2	2	2	FALSE	71	-0.89615	0.830451	NA	NA	NA	NA	-0.89615	0.830451
6	Q	4	I	F	H	2	2	2	FALSE	167	-1.60966	0.550275	-1.77737	0.592133	-0.347918	1.05253	-1.51605	0.376429
6	Q	4	L	F	H	2	2	2	FALSE	450	-1.35315	0.327419	-1.07289	0.472096	NA	NA	-1.26212	0.269046
6	Q	4	S	F	H	2	2	2	FALSE	263.667	-1.09344	0.357245	-0.379906	0.546063	0.346172	0.921574	-0.76287	0.284364
6	Q	4	V	F	H	2	2	2	FALSE	118	-0.262459	0.639598	NA	NA	NA	NA	-0.262459	0.639598
6	Q	4	Y	F	H	2	2	2	FALSE	300.667	-0.479497	0.363407	-0.285603	0.492241	-1.30547	0.699812	-0.544001	0.269768
6	Q	5	*	R	H	2	2	2	TRUE	110.5	-3.28173	0.761928	-3.55851	1.23639	NA	NA	-3.35791	0.648651
6	Q	5	L	R	H	2	2	2	FALSE	184.5	-1.04116	0.537851	-1.73154	0.698604	NA	NA	-1.29808	0.426177
6	Q	5	Q	R	H	2	2	2	FALSE	216	-0.220569	0.467047	-1.02533	0.664355	NA	NA	-0.486749	0.382079
6	R	1	E	D	H	2	2	2	FALSE	239.667	0.264475	0.36452	0.5401	0.587663	-0.344073	0.826613	0.256691	0.290068
6	R	1	G	D	H	2	2	2	FALSE	302	-0.169402	0.405195	0.538859	0.54291	NA	NA	0.083977	0.324726
6	R	1	H	D	H	2	2	2	FALSE	60	-1.26792	0.858631	-0.97948	1.3135	NA	NA	-1.18157	0.718697
6	R	1	N	D	H	2	2	2	FALSE	193	0.0540875	0.52972	-0.154536	0.643115	NA	NA	-0.0302405	0.408877
6	R	1	V	D	H	2	2	2	FALSE	268.333	-1.98423	0.409908	-2.16853	0.517614	-2.27309	0.870553	-2.08138	0.301465
6	R	1	Y	D	H	2	2	2	FALSE	84.5	0.361319	0.702311	0.243312	1.09164	NA	NA	0.326774	0.590635
6	R	2	E	A	H	2	2	2	FALSE	100	-0.626235	0.734543	-0.880823	0.902331	NA	NA	-0.727704	0.569657
6	R	2	G	A	H	2	2	2	FALSE	53	NA	NA	0.232561	1.28069	NA	NA	0.232561	1.28069
6	R	2	P	A	H	2	2	2	FALSE	63.5	-0.345933	0.966042	-2.82539	1.20728	NA	NA	-1.3138	0.754285
6	R	2	S	A	H	2	2	2	FALSE	74	NA	NA	0.148505	1.08499	NA	NA	0.148505	1.08499
6	R	2	T	A	H	2	2	2	FALSE	138.667	0.223935	0.513483	0.265182	0.725273	-0.72185	0.964	0.0851827	0.384336
6	R	2	V	A	H	2	2	2	FALSE	104	-2.34569	0.65329	-0.286784	0.932991	-3.10635	1.00419	-1.98639	0.472268
6	R	3	*	E	H	2	2	2	TRUE	73	-3.16871	0.962856	-4.93061	1.80935	-3.36658	1.20446	-3.49406	0.694475
6	R	3	D	E	H	2	2	2	FALSE	82	0.315698	0.863661	-0.062286	0.930866	NA	NA	0.140842	0.633127
6	R	3	G	E	H	2	2	2	FALSE	200	0.262614	0.430455	0.894787	0.573494	1.10543	0.943753	0.562651	0.323421
6	R	3	K	E	H	2	2	2	FALSE	91	1.47164	0.865422	-0.486563	0.858435	NA	NA	0.484602	0.609461
6	R	3	V	E	H	2	2	2	FALSE	139.333	-0.318701	0.507671	-1.39383	0.76609	-1.53302	0.950342	-0.793424	0.386589
6	R	4	I	F	H	2	2	2	FALSE	153.667	-0.27352	0.516449	-1.62631	0.667138	0.34639	0.958029	-0.607163	0.375674
6	R	4	L	F	H	2	2	2	FALSE	280.333	-0.721287	0.40639	-0.948754	0.445134	NA	NA	-0.824692	0.300126
6	R	4	S	F	H	2	2	2	FALSE	179.667	-0.107833	0.439887	0.11747	0.672004	-0.667237	0.848616	-0.139515	0.337658
6	R	4	Y	F	H	2	2	2	FALSE	290	0.473736	0.37862	-0.110328	0.484899	0.147531	0.691614	0.236038	0.274004
6	R	5	*	R	H	2	2	2	TRUE	172.5	-2.69563	0.626278	-3.45664	0.852363	NA	NA	-2.96243	0.504692
6	R	5	G	R	H	2	2	2	FALSE	51	-1.03908	0.981564	NA	NA	NA	NA	-1.03908	0.981564
6	R	5	L	R	H	2	2	2	FALSE	210	-0.691196	0.483159	-0.767558	0.660887	NA	NA	-0.717794	0.390041
6	R	5	Q	R	H	2	2	2	FALSE	172	-1.35642	0.482435	0.00688079	0.857393	NA	NA	-1.02859	0.420447
6	Y	1	E	D	H	2	2	2	FALSE	166	-0.335498	0.5384	-1.30564	0.74989	NA	NA	-0.665488	0.43735
6	Y	1	G	D	H	2	2	2	FALSE	157	0.0948648	0.516809	0.114903	0.8136	NA	NA	0.100626	0.436239
6	Y	1	N	D	H	2	2	2	FALSE	82.5	0.467071	0.802394	1.07243	0.969093	NA	NA	0.713284	0.618039
6	Y	1	V	D	H	2	2	2	FALSE	161.5	-1.45768	0.510017	-2.83855	0.958954	NA	NA	-1.76215	0.450293
6	Y	2	E	A	H	2	2	2	FALSE	82	-1.57649	0.794043	NA	NA	NA	NA	-1.57649	0.794043
6	Y	2	T	A	H	2	2	2	FALSE	73	-0.205732	0.729226	-0.356683	1.25279	NA	NA	-0.243933	0.630233
6	Y	2	V	A	H	2	2	2	FALSE	146	-1.85912	0.532621	-2.83855	1.05977	NA	NA	-2.05662	0.475897
6	Y	3	*	E	H	2	2	2	TRUE	73.5	-3.11607	0.979073	-4.04524	1.52463	NA	NA	-3.38737	0.823832
6	Y	3	D	E	H	2	2	2	FALSE	51	-2.233	1.05001	NA	NA	NA	NA	-2.233	1.05001
6	Y	3	G	E	H	2	2	2	FALSE	88	-0.205901	0.737284	NA	NA	NA	NA	-0.205901	0.737284
6	Y	3	K	E	H	2	2	2	FALSE	59	-0.620856	0.903651	NA	NA	NA	NA	-0.620856	0.903651
6	Y	3	V	E	H	2	2	2	FALSE	95	-2.66746	0.705204	-1.64791	1.2088	NA	NA	-2.40857	0.609125
6	Y	4	I	F	H	2	2	2	FALSE	98	-0.170572	0.758323	-1.11459	0.895011	NA	NA	-0.565063	0.578573
6	Y	4	L	F	H	2	2	2	FALSE	114.667	-1.38069	0.562949	-0.248983	0.838682	NA	NA	-1.02917	0.467415
6	Y	4	S	F	H	2	2	2	FALSE	125	-1.12289	0.644383	-0.125035	0.824653	NA	NA	-0.744594	0.507753
6	Y	4	Y	F	H	2	2	2	FALSE	200.5	-1.42442	0.433501	-0.690051	0.872	NA	NA	-1.27889	0.388179
6	Y	5	*	R	H	2	2	2	TRUE	79	-3.58692	1.0421	NA	NA	NA	NA	-3.58692	1.0421
6	Y	5	L	R	H	2	2	2	FALSE	118.5	-1.88616	0.629413	-1.10353	0.950889	NA	NA	-1.64772	0.52485
6	Y	5	Q	R	H	2	2	2	FALSE	75	-2.50472	0.829317	-1.53138	1.21281	NA	NA	-2.19461	0.684573
7	A	1	E	D	D	2	2	2	FALSE	66	NA	NA	-1.28875	1.17551	NA	NA	-1.28875	1.17551
7	A	1	V	D	D	2	2	2	FALSE	67	NA	NA	-4.65631	1.89167	NA	NA	-4.65631	1.89167
7	A	4	I	F	D	2	2	2	FALSE	59	0.0282309	0.894517	NA	NA	NA	NA	0.0282309	0.894517
7	A	4	L	F	D	2	2	2	FALSE	64.5	-0.135626	0.84194	-1.12345	1.20727	NA	NA	-0.458855	0.690589
7	A	6	L	H	D	2	2	2	FALSE	56	-0.501979	0.925002	NA	NA	NA	NA	-0.501979	0.925002
7	E	1	E	D	D	2	2	2	FALSE	104	-0.373238	0.668877	0.495759	0.931839	NA	NA	-0.0777453	0.543382
7	E	1	G	D	D	2	2	2	FALSE	88	0.152564	0.71839	0.329431	1.01733	NA	NA	0.211414	0.586827
7	E	1	N	D	D	2	2	2	FALSE	143	0.39839	0.736689	-1.70963	0.698748	NA	NA	-0.711302	0.506972
7	E	1	V	D	D	2	2	2	FALSE	226	-1.69665	0.522286	-3.18539	0.766429	NA	NA	-2.16876	0.4316
7	E	1	Y	D	D	2	2	2	FALSE	73	-3.50793	1.06455	NA	NA	NA	NA	-3.50793	1.06455
7	E	2	S	A	D	2	2	2	FALSE	77	NA	NA	-2.00685	1.12172	NA	NA	-2.00685	1.12172
7	E	2	T	A	D	2	2	2	FALSE	52	NA	NA	-3.00661	1.49103	NA	NA	-3.00661	1.49103
7	E	2	V	A	D	2	2	2	FALSE	55	NA	NA	-1.80268	1.31267	NA	NA	-1.80268	1.31267
7	E	3	G	E	D	2	2	2	FALSE	85	0.265276	0.949717	-0.58946	0.867353	NA	NA	-0.200756	0.640454
7	E	3	V	E	D	2	2	2	FALSE	93	-0.821268	0.677213	-0.650592	1.05303	NA	NA	-0.771332	0.569592
7	E	4	I	F	D	2	2	2	FALSE	126.5	-0.0206156	0.704928	-0.421835	0.749904	NA	NA	-0.208833	0.513624
7	E	4	L	F	D	2	2	2	FALSE	145	-2.04449	0.539914	-1.17453	0.947912	NA	NA	-1.83139	0.469149
7	E	4	S	F	D	2	2	2	FALSE	64	NA	NA	-1.59631	1.2063	NA	NA	-1.59631	1.2063
7	E	4	Y	F	D	2	2	2	FALSE	103.5	-0.429408	0.678756	0.579015	0.92231	NA	NA	-0.0751288	0.546674
7	E	5	*	R	D	2	2	2	TRUE	58	NA	NA	-3.81383	1.62096	NA	NA	-3.81383	1.62096
7	E	5	L	R	D	2	2	2	FALSE	55	-4.00496	1.32926	-3.66451	1.69218	NA	NA	-3.87505	1.04531
7	E	5	Q	R	D	2	2	2	FALSE	58	NA	NA	0.378128	1.22324	NA	NA	0.378128	1.22324
7	E	6	L	H	D	2	2	2	FALSE	121	-4.03775	0.936602	-1.838	0.898831	NA	NA	-2.89263	0.648512
7	E	6	Q	H	D	2	2	2	FALSE	310	NA	NA	-2.80273	0.696408	NA	NA	-2.80273	0.696408
7	E	6	R	H	D	2	2	2	FALSE	182	NA	NA	-1.03167	0.718057	NA	NA	-1.03167	0.718057
7	G	1	E	D	D	2	2	2	FALSE	151.5	0.398404	0.532493	-0.0561373	0.805706	NA	NA	0.260221	0.444239
7	G	1	G	D	D	2	2	2	FALSE	146.5	0.0397884	0.558478	0.466166	0.794017	NA	NA	0.180909	0.456802
7	G	1	N	D	D	2	2	2	FALSE	90.5	1.02094	0.718089	1.23686	0.979315	NA	NA	1.09644	0.579092
7	G	1	V	D	D	2	2	2	FALSE	126	0.0827408	0.565289	-2.78325	0.788803	-0.424994	1.09091	-0.819704	0.423454
7	G	2	P	A	D	2	2	2	FALSE	56	NA	NA	-1.68646	1.29414	NA	NA	-1.68646	1.29414
7	G	2	S	A	D	2	2	2	FALSE	53	0.0210661	0.943152	NA	NA	NA	NA	0.0210661	0.943152
7	G	2	T	A	D	2	2	2	FALSE	92.5	-1.28854	0.653516	0.738385	1.14486	NA	NA	-0.790398	0.567558
7	G	2	V	A	D	2	2	2	FALSE	53	-1.62961	0.987113	NA	NA	NA	NA	-1.62961	0.987113
7	G	3	*	E	D	2	2	2	TRUE	60	-3.31181	1.12612	NA	NA	NA	NA	-3.31181	1.12612
7	G	3	D	E	D	2	2	2	FALSE	72	NA	NA	-2.771	1.2329	NA	NA	-2.771	1.2329
7	G	3	G	E	D	2	2	2	FALSE	73.5	1.11524	0.783965	0.993112	1.1029	NA	NA	1.07424	0.638984
7	G	3	V	E	D	2	2	2	FALSE	101.5	-0.456708	0.692056	-1.39334	0.949359	NA	NA	-0.781723	0.559238
7	G	4	I	F	D	2	2	2	FALSE	77.5	-0.646321	0.819775	-2.02135	1.08143	NA	NA	-1.14811	0.653288
7	G	4	L	F	D	2	2	2	FALSE	197	0.329956	0.564671	-1.18237	0.609213	NA	NA	-0.368904	0.414135
7	G	4	S	F	D	2	2	2	FALSE	227	0.103179	0.476332	-0.952783	0.616017	NA	NA	-0.291942	0.37682
7	G	4	Y	F	D	2	2	2	FALSE	82	0.433481	0.914372	-1.40053	0.922942	NA	NA	-0.474972	0.649567
7	G	5	*	R	D	2	2	2	TRUE	79	-2.98331	0.795137	-2.74266	1.47447	NA	NA	-2.92909	0.699859
7	G	5	L	R	D	2	2	2	FALSE	169.5	-0.742348	0.54106	-0.462462	0.723884	NA	NA	-0.64203	0.43338
7	G	5	Q	R	D	2	2	2	FALSE	66.5	-1.53424	0.850447	-1.33987	1.21462	NA	NA	-1.47029	0.696655
7	G	6	D	H	D	2	2	2	FALSE	80	-0.978455	0.785031	NA	NA	NA	NA	-0.978455	0.785031
7	G	6	L	H	D	2	2	2	FALSE	161	-0.902743	0.531381	-1.51063	0.802917	NA	NA	-1.0879	0.443126
7	G	6	N	H	D	2	2	2	FALSE	62	1.01319	0.936405	0.989649	1.10291	NA	NA	1.00333	0.713826
7	G	6	Q	H	D	2	2	2	FALSE	170.5	0.00649765	0.472692	-0.00988744	0.850436	NA	NA	0.0026304	0.41316
7	G	6	R	H	D	2	2	2	FALSE	135	1.06309	0.599229	-1.12814	0.650462	0.969405	1.014	0.202105	0.404193
7	G	6	Y	H	D	2	2	2	FALSE	79	-0.398163	0.723575	-0.0283819	1.15031	NA	NA	-0.293329	0.612479
7	H	1	V	D	D	2	2	2	FALSE	51	-3.14929	1.18398	NA	NA	NA	NA	-3.14929	1.18398
7	N	1	E	D	D	2	2	2	FALSE	152.5	-0.422476	0.551857	-0.792951	0.787882	NA	NA	-0.544411	0.452007
7	N	1	G	D	D	2	2	2	FALSE	102	1.06837	0.679082	1.02379	0.920702	NA	NA	1.05267	0.546509
7	N	1	N	D	D	2	2	2	FALSE	79	0.758435	0.861041	-0.537995	0.964979	NA	NA	0.183775	0.642464
7	N	1	V	D	D	2	2	2	FALSE	141.5	-0.301106	0.645302	-2.05742	0.76525	NA	NA	-1.03099	0.493319
7	N	2	T	A	D	2	2	2	FALSE	82.5	-1.20594	0.772218	-0.9737	1.05293	NA	NA	-1.12471	0.622701
7	N	3	*	E	D	2	2	2	TRUE	58	NA	NA	-3.81383	1.62096	NA	NA	-3.81383	1.62096
7	N	3	G	E	D	2	2	2	FALSE	86	0.808359	0.738931	NA	NA	NA	NA	0.808359	0.738931
7	N	3	V	E	D	2	2	2	FALSE	77	NA	NA	-2.14119	1.13082	NA	NA	-2.14119	1.13082
7	N	4	I	F	D	2	2	2	FALSE	63	-0.603762	0.830452	-0.764609	1.26041	NA	NA	-0.652451	0.693462
7	N	4	L	F	D	2	2	2	FALSE	71	NA	NA	-1.99016	1.16692	NA	NA	-1.99016	1.16692
7	N	4	S	F	D	2	2	2	FALSE	124.5	-0.66092	0.552727	0.731755	0.997646	NA	NA	-0.333837	0.483483
7	N	4	Y	F	D	2	2	2	FALSE	98	-0.480148	0.652722	0.699431	1.02764	NA	NA	-0.141063	0.550975
7	N	5	*	R	D	2	2	2	TRUE	57	NA	NA	-2.87448	1.40142	NA	NA	-2.87448	1.40142
7	N	5	L	R	D	2	2	2	FALSE	52	NA	NA	-0.426094	1.3011	NA	NA	-0.426094	1.3011
7	N	6	L	H	D	2	2	2	FALSE	104.5	0.219747	0.773481	-0.498274	0.825068	NA	NA	-0.116116	0.56429
7	N	6	Q	H	D	2	2	2	FALSE	107.5	-0.103806	0.571995	1.83807	1.13315	NA	NA	0.29052	0.510628
7	N	6	R	H	D	2	2	2	FALSE	99.5	0.710559	0.723075	0.0269549	0.895514	NA	NA	0.440769	0.562579
7	N	6	Y	H	D	2	2	2	FALSE	56.5	-0.14423	0.889016	-0.933713	1.29979	NA	NA	-0.39585	0.733794
7	V	1	E	D	D	2	2	2	FALSE	130	-0.476317	0.490995	-0.4836	0.837821	-1.0523	1.02582	-0.561818	0.391541
7	V	1	G	D	D	2	2	2	FALSE	204.5	-0.792353	0.445953	0.604123	0.753812	NA	NA	-0.430313	0.383817
7	V	1	N	D	D	2	2	2	FALSE	112.5	-0.114214	0.791193	-1.85514	0.801049	NA	NA	-0.973903	0.56291
7	V	1	V	D	D	2	2	2	FALSE	216.333	-1.71617	0.434005	-2.15863	0.584736	-2.21261	0.996695	-1.9103	0.32897
7	V	1	Y	D	D	2	2	2	FALSE	51	NA	NA	-3.68443	1.68224	NA	NA	-3.68443	1.68224
7	V	2	E	A	D	2	2	2	FALSE	72.5	-0.627859	0.759789	-0.548724	1.20355	NA	NA	-0.605309	0.642478
7	V	2	S	A	D	2	2	2	FALSE	68	-0.325382	0.769176	0.447038	1.25559	NA	NA	-0.114607	0.655888
7	V	2	T	A	D	2	2	2	FALSE	61.5	-0.511954	0.959622	0.15099	1.10758	NA	NA	-0.22769	0.725267
7	V	2	V	A	D	2	2	2	FALSE	101	-1.88668	0.730168	NA	NA	NA	NA	-1.88668	0.730168
7	V	3	*	E	D	2	2	2	TRUE	57	NA	NA	-4.49369	1.94997	NA	NA	-4.49369	1.94997
7	V	3	D	E	D	2	2	2	FALSE	61	-0.654193	0.889568	NA	NA	NA	NA	-0.654193	0.889568
7	V	3	G	E	D	2	2	2	FALSE	60	NA	NA	-0.361164	1.21048	NA	NA	-0.361164	1.21048
7	V	3	K	E	D	2	2	2	FALSE	71.5	-0.209108	0.875559	-0.911449	1.05154	NA	NA	-0.496673	0.672849
7	V	3	V	E	D	2	2	2	FALSE	85.3333	-2.35296	0.711949	-1.64124	1.03698	-1.87907	1.07875	-2.06879	0.515562
7	V	4	I	F	D	2	2	2	FALSE	141.667	-1.17655	0.544725	-1.77024	0.69982	-2.88991	1.09251	-1.60019	0.400007
7	V	4	L	F	D	2	2	2	FALSE	240	-1.3655	0.43449	-1.13523	0.666396	NA	NA	-1.29681	0.363963
7	V	4	S	F	D	2	2	2	FALSE	130.333	-0.837955	0.524877	0.191266	0.746002	1.00102	1.06569	-0.288008	0.398181
7	V	4	Y	F	D	2	2	2	FALSE	137.667	-1.17481	0.574432	-1.22037	0.682649	-0.125656	0.980157	-1.01488	0.401049
7	V	5	*	R	D	2	2	2	TRUE	88	-2.80099	0.891443	NA	NA	NA	NA	-2.80099	0.891443
7	V	5	L	R	D	2	2	2	FALSE	161.5	-2.08645	0.552354	-1.99552	0.838358	NA	NA	-2.05893	0.461243
7	V	5	Q	R	D	2	2	2	FALSE	118	NA	NA	-0.261311	0.863243	NA	NA	-0.261311	0.863243
7	V	6	N	H	D	2	2	2	FALSE	51	-0.774387	0.974375	NA	NA	NA	NA	-0.774387	0.974375
7	V	6	Q	H	D	2	2	2	FALSE	181	-2.72403	0.567714	-2.19214	0.783486	NA	NA	-2.54091	0.459715
7	V	6	R	H	D	2	2	2	FALSE	175.5	-0.780902	0.567895	-1.13889	0.67946	NA	NA	-0.928131	0.435739
7	V	6	Y	H	D	2	2	2	FALSE	116.5	-0.764823	0.637878	-1.43712	0.907489	NA	NA	-0.987145	0.521857
7	Y	1	E	D	D	2	2	2	FALSE	159	0.272255	0.562483	0.683219	0.723639	NA	NA	0.427038	0.444101
7	Y	1	G	D	D	2	2	2	FALSE	78	0.295722	0.808942	0.861284	1.01472	NA	NA	0.515488	0.632539
7	Y	1	N	D	D	2	2	2	FALSE	76.5	-0.36919	0.743257	-0.148164	1.1516	NA	NA	-0.304194	0.624484
7	Y	1	V	D	D	2	2	2	FALSE	118.5	-3.56559	0.858041	-3.63179	1.0818	NA	NA	-3.59116	0.672254
7	Y	2	T	A	D	2	2	2	FALSE	75	-1.25769	0.81794	NA	NA	NA	NA	-1.25769	0.81794
7	Y	2	V	A	D	2	2	2	FALSE	68	NA	NA	-3.97386	1.55262	NA	NA	-3.97386	1.55262
7	Y	3	G	E	D	2	2	2	FALSE	72	-1.07612	0.764348	1.09278	1.20918	NA	NA	-0.456906	0.64609
7	Y	3	V	E	D	2	2	2	FALSE	51	-1.47126	1.00789	-0.217195	1.29791	NA	NA	-0.99951	0.796054
7	Y	4	L	F	D	2	2	2	FALSE	110	-2.1793	0.803203	-1.93999	0.90692	NA	NA	-2.07411	0.601291
7	Y	4	S	F	D	2	2	2	FALSE	74	NA	NA	-0.00914479	1.08636	NA	NA	-0.00914479	1.08636
7	Y	4	Y	F	D	2	2	2	FALSE	59.5	0.45711	0.862696	0.964114	1.24157	NA	NA	0.622193	0.70846
7	Y	5	L	R	D	2	2	2	FALSE	79	-1.30965	0.798966	NA	NA	NA	NA	-1.30965	0.798966
7	Y	5	Q	R	D	2	2	2	FALSE	86	NA	NA	-0.563784	1.0144	NA	NA	-0.563784	1.0144
7	Y	6	L	H	D	2	2	2	FALSE	60	NA	NA	-1.75587	1.25419	NA	NA	-1.75587	1.25419
7	Y	6	Q	H	D	2	2	2	FALSE	91	0.601823	0.868651	-1.41288	0.876152	NA	NA	-0.396867	0.616864
7	Y	6	R	H	D	2	2	2	FALSE	70	-0.603762	0.903328	-2.8895	1.17816	NA	NA	-1.45001	0.716865
8	*	1	E	D	S	2	2	2	TRUE	64	-2.80099	1.00911	-3.52054	1.44419	NA	NA	-3.03705	0.827187
8	*	1	G	D	S	2	2	2	TRUE	54	-2.11789	1.04986	-2.89198	1.39216	NA	NA	-2.39852	0.838227
8	*	1	V	D	S	2	2	2	TRUE	58.5	-3.13746	1.0641	-3.74194	1.65431	NA	NA	-3.31437	0.894949
8	*	4	I	F	S	2	2	2	TRUE	80	NA	NA	-3.21551	1.23797	NA	NA	-3.21551	1.23797
8	*	4	L	F	S	2	2	2	TRUE	69.5	NA	NA	-3.35247	1.52478	NA	NA	-3.35247	1.52478
8	*	4	S	F	S	2	2	2	TRUE	81	NA	NA	-3.45251	1.27838	NA	NA	-3.45251	1.27838
8	*	6	R	H	S	2	2	2	TRUE	57	NA	NA	-3.79633	1.62892	NA	NA	-3.79633	1.62892
8	*	7	G	D	S	2	2	2	TRUE	53	-2.62814	1.07443	NA	NA	NA	NA	-2.62814	1.07443
8	A	1	V	D	S	2	2	2	FALSE	102	NA	NA	-4.38179	1.41115	NA	NA	-4.38179	1.41115
8	A	5	L	R	S	2	2	2	FALSE	57	-2.44959	1.01533	NA	NA	NA	NA	-2.44959	1.01533
8	L	1	E	D	S	2	2	2	FALSE	110	-0.439694	0.614291	-0.48295	0.985112	NA	NA	-0.451804	0.521251
8	L	1	G	D	S	2	2	2	FALSE	137.5	0.582192	0.748467	-0.573311	0.682306	NA	NA	-0.0488775	0.504234
8	L	1	V	D	S	2	2	2	FALSE	112	-2.43061	0.822682	-3.16538	0.939925	NA	NA	-2.74934	0.61905
8	L	2	T	A	S	2	2	2	FALSE	83	-1.2614	0.778374	NA	NA	NA	NA	-1.2614	0.778374
8	L	2	V	A	S	2	2	2	FALSE	58	NA	NA	-3.4059	1.49817	NA	NA	-3.4059	1.49817
8	L	3	V	E	S	2	2	2	FALSE	67.5	-2.5366	0.889536	-1.56607	1.25478	NA	NA	-2.21199	0.725683
8	L	4	I	F	S	2	2	2	FALSE	89	NA	NA	-1.97967	1.04201	NA	NA	-1.97967	1.04201
8	L	4	L	F	S	2	2	2	FALSE	64	-2.1977	0.935674	NA	NA	NA	NA	-2.1977	0.935674
8	L	4	S	F	S	2	2	2	FALSE	73	-1.35098	0.81567	-1.73807	1.16045	NA	NA	-1.47898	0.667316
8	L	4	Y	F	S	2	2	2	FALSE	91	-1.17521	0.766909	-1.24454	0.969034	NA	NA	-1.20191	0.601365
8	L	6	L	H	S	2	2	2	FALSE	127	0.292326	0.630424	-3.55103	1.01247	NA	NA	-0.781446	0.535161
8	L	6	Q	H	S	2	2	2	FALSE	105.5	-1.50888	0.760247	-1.09099	0.861026	NA	NA	-1.32581	0.569892
8	L	6	R	H	S	2	2	2	FALSE	90.5	-1.41913	0.673803	-1.7633	1.17869	NA	NA	-1.5039	0.584968
8	L	7	G	D	S	2	2	2	FALSE	83	NA	NA	-2.14727	1.08973	NA	NA	-2.14727	1.08973
8	L	7	V	D	S	2	2	2	FALSE	51	-1.82754	1.01785	NA	NA	NA	NA	-1.82754	1.01785
8	P	1	E	D	S	2	2	2	FALSE	212.5	-0.890386	0.425003	0.734298	0.765914	NA	NA	-0.5079	0.371624
8	P	1	G	D	S	2	2	2	FALSE	189	0.331853	0.54205	-0.144927	0.641564	NA	NA	0.133267	0.414052
8	P	1	N	D	S	2	2	2	FALSE	115.5	0.853022	0.726483	-1.18179	0.800276	NA	NA	-0.0662633	0.537902
8	P	1	V	D	S	2	2	2	FALSE	145.667	-0.923809	0.564714	-1.49571	0.692089	-1.28507	0.86366	-1.17949	0.390311
8	P	1	Y	D	S	2	2	2	FALSE	52	NA	NA	-1.08548	1.31673	NA	NA	-1.08548	1.31673
8	P	2	E	A	S	2	2	2	FALSE	92	-0.0616549	0.668956	-1.44384	1.09393	NA	NA	-0.437844	0.570706
8	P	2	S	A	S	2	2	2	FALSE	73.5	0.896837	0.853793	-0.672032	1.03425	NA	NA	0.260997	0.658426
8	P	2	T	A	S	2	2	2	FALSE	113	NA	NA	-1.06298	0.893885	NA	NA	-1.06298	0.893885
8	P	2	V	A	S	2	2	2	FALSE	69	-0.985129	0.775739	-0.291752	1.25183	NA	NA	-0.792745	0.659397
8	P	3	*	E	S	2	2	2	TRUE	74	-2.96192	0.954505	NA	NA	NA	NA	-2.96192	0.954505
8	P	3	G	E	S	2	2	2	FALSE	100	0.00934261	0.608137	1.79084	1.10875	NA	NA	0.42134	0.533199
8	P	3	K	E	S	2	2	2	FALSE	54	NA	NA	0.925797	1.26446	NA	NA	0.925797	1.26446
8	P	3	V	E	S	2	2	2	FALSE	74.3333	-0.853574	0.719213	-0.499295	1.24408	-2.20885	0.964301	-1.18974	0.523084
8	P	4	I	F	S	2	2	2	FALSE	123	-0.250697	0.658772	-2.08327	0.851916	NA	NA	-0.936455	0.521137
8	P	4	L	F	S	2	2	2	FALSE	204.5	-0.309702	0.502388	-0.970191	0.643362	NA	NA	-0.559891	0.395965
8	P	4	S	F	S	2	2	2	FALSE	158	-0.392453	0.565264	-0.413825	0.736524	NA	NA	-0.400375	0.448422
8	P	4	Y	F	S	2	2	2	FALSE	143	0.49485	0.617106	-0.809331	0.745621	NA	NA	-0.0353315	0.475402
8	P	5	*	R	S	2	2	2	TRUE	114	NA	NA	-3.38841	1.06634	NA	NA	-3.38841	1.06634
8	P	5	L	R	S	2	2	2	FALSE	165	-0.558447	0.570552	-0.577441	0.704669	NA	NA	-0.565968	0.443426
8	P	5	P	R	S	2	2	2	FALSE	54	-0.704858	0.963495	0.332253	1.24519	NA	NA	-0.316458	0.762013
8	P	5	Q	R	S	2	2	2	FALSE	95	-0.577786	0.797167	-1.29634	0.895525	NA	NA	-0.895452	0.595432
8	P	6	L	H	S	2	2	2	FALSE	75	1.03258	0.840464	-1.60593	1.05377	NA	NA	0.00672652	0.657068
8	P	6	N	H	S	2	2	2	FALSE	51	-0.751398	0.973834	NA	NA	NA	NA	-0.751398	0.973834
8	P	6	Q	H	S	2	2	2	FALSE	149.5	-0.314436	0.566348	-1.2017	0.787051	NA	NA	-0.617127	0.459702
8	P	6	R	H	S	2	2	2	FALSE	88.3333	0.371236	0.608326	1.33129	1.09422	-1.13353	0.982253	0.205558	0.46758
8	P	6	Y	H	S	2	2	2	FALSE	75	-0.734382	0.706302	-0.549441	1.30332	NA	NA	-0.692398	0.620978
8	P	7	E	D	S	2	2	2	FALSE	82	0.789267	0.795457	-1.79869	1.02668	NA	NA	-0.181508	0.628807
8	P	7	G	D	S	2	2	2	FALSE	57.5	0.875314	0.928398	0.622651	1.19133	NA	NA	0.779848	0.732294
8	P	7	V	D	S	2	2	2	FALSE	70	NA	NA	0.271261	1.1145	NA	NA	0.271261	1.1145
8	P	7	Y	D	S	2	2	2	FALSE	67	NA	NA	-2.69859	1.26835	NA	NA	-2.69859	1.26835
8	T	1	E	D	S	2	2	2	FALSE	120	-0.741685	0.552083	-0.032045	0.774777	0.0488117	1.0781	-0.420994	0.414972
8	T	1	G	D	S	2	2	2	FALSE	170	1.24232	0.483817	0.156042	0.807292	NA	NA	0.955264	0.414996
8	T	1	N	D	S	2	2	2	FALSE	112	-0.00905476	0.653855	NA	NA	NA	NA	-0.00905476	0.653855
8	T	1	V	D	S	2	2	2	FALSE	227.333	-1.79475	0.42651	-1.18221	0.569546	-2.3763	0.858256	-1.68418	0.31722
8	T	1	Y	D	S	2	2	2	FALSE	61	-0.750365	0.857611	-1.51357	1.28535	NA	NA	-0.985466	0.713394
8	T	2	E	A	S	2	2	2	FALSE	85	-0.614935	0.73437	-1.68019	1.083	NA	NA	-0.950469	0.607809
8	T	2	S	A	S	2	2	2	FALSE	92	0.371097	0.863266	-0.286569	0.85277	NA	NA	0.0382415	0.606676
8	T	2	T	A	S	2	2	2	FALSE	70.5	0.508096	0.966413	-0.426094	0.984367	NA	NA	0.0495974	0.689617
8	T	2	V	A	S	2	2	2	FALSE	78.5	-1.00923	0.863619	-3.1617	1.15183	NA	NA	-1.78382	0.690969
8	T	3	G	E	S	2	2	2	FALSE	82.5	1.28138	0.859121	0.685741	0.921857	NA	NA	1.00452	0.6285
8	T	3	K	E	S	2	2	2	FALSE	100.5	-0.861174	0.593759	1.09454	1.19909	NA	NA	-0.476062	0.532097
8	T	3	V	E	S	2	2	2	FALSE	170.667	-0.953347	0.443741	-1.88349	0.802186	-1.74545	0.810064	-1.27855	0.350146
8	T	4	I	F	S	2	2	2	FALSE	115	0.0536672	0.647803	-1.52274	0.89447	NA	NA	-0.488698	0.52466
8	T	4	L	F	S	2	2	2	FALSE	269	-0.688399	0.368422	-0.262087	0.542896	-0.376074	0.678117	-0.524066	0.278048
8	T	4	S	F	S	2	2	2	FALSE	141.333	-0.378268	0.537245	-1.49668	0.736845	-1.13614	0.87515	-0.83946	0.388893
8	T	4	Y	F	S	2	2	2	FALSE	86.6667	0.231806	0.696054	-0.652903	0.90273	-0.350175	1.06158	-0.1516	0.489205
8	T	5	*	R	S	2	2	2	TRUE	79.5	-3.0167	1.01131	-4.97533	1.79764	NA	NA	-3.48756	0.881403
8	T	5	L	R	S	2	2	2	FALSE	227.667	-0.847171	0.400077	-1.20029	0.580081	-0.466136	0.851475	-0.896596	0.307166
8	T	5	P	R	S	2	2	2	FALSE	61	-3.32834	1.12059	NA	NA	NA	NA	-3.32834	1.12059
8	T	5	Q	R	S	2	2	2	FALSE	70.5	-0.14423	0.889016	-1.42538	1.066	NA	NA	-0.669763	0.682747
8	T	6	L	H	S	2	2	2	FALSE	110	-1.59348	0.67942	-2.54677	0.989921	NA	NA	-1.89874	0.560174
8	T	6	Q	H	S	2	2	2	FALSE	163.5	-0.383976	0.524187	-0.474841	0.773319	NA	NA	-0.412582	0.433899
8	T	6	R	H	S	2	2	2	FALSE	194.667	-0.293906	0.471482	-0.798359	0.556019	-0.0649775	0.934699	-0.448188	0.335621
8	T	6	Y	H	S	2	2	2	FALSE	63	NA	NA	-1.13955	1.19817	NA	NA	-1.13955	1.19817
8	T	7	G	D	S	2	2	2	FALSE	103	NA	NA	-2.02595	0.971415	NA	NA	-2.02595	0.971415
8	T	7	N	D	S	2	2	2	FALSE	59	-0.461792	0.900848	NA	NA	NA	NA	-0.461792	0.900848
8	T	7	V	D	S	2	2	2	FALSE	97	-1.46876	0.734973	-2.63666	1.03763	NA	NA	-1.85895	0.59976
9	*	1	E	D	G	2	2	2	TRUE	185.667	-3.35336	0.676414	-4.09891	0.754155	-2.78631	0.960406	-3.4918	0.445966
9	*	1	G	D	G	2	2	2	TRUE	197	-3.50793	0.540625	-4.43462	0.987989	-3.53173	0.995413	-3.68636	0.428152
9	*	1	N	D	G	2	2	2	TRUE	214.5	-3.53496	0.616591	-3.45993	0.808007	NA	NA	-3.50735	0.490173
9	*	1	V	D	G	2	2	2	TRUE	181.667	-4.96047	0.933386	-4.86365	1.05645	-4.20905	1.27046	-4.7531	0.61275
9	*	1	Y	D	G	2	2	2	TRUE	103.5	-5.0226	1.59832	-4.57828	1.35742	NA	NA	-4.76447	1.03464
9	*	2	E	A	G	2	2	2	TRUE	135	NA	NA	-5.36115	1.71329	NA	NA	-5.36115	1.71329
9	*	2	P	A	G	2	2	2	TRUE	57	NA	NA	-3.79633	1.62892	NA	NA	-3.79633	1.62892
9	*	2	T	A	G	2	2	2	TRUE	107	-3.44867	0.969227	-4.92488	1.28123	-3.48511	1.15415	-3.83088	0.64224
9	*	2	V	A	G	2	2	2	TRUE	99.5	-4.30506	1.25322	NA	NA	NA	NA	-4.30506	1.25322
9	*	3	*	E	G	2	2	2	TRUE	91	NA	NA	-2.05642	1.03508	NA	NA	-2.05642	1.03508
9	*	3	G	E	G	2	2	2	TRUE	128	-1.03309	0.685259	-4.36187	1.15759	NA	NA	-1.89689	0.589684
9	*	3	K	E	G	2	2	2	TRUE	65.5	-3.88718	1.11582	-2.98708	1.50181	NA	NA	-3.56703	0.895663
9	*	3	V	E	G	2	2	2	TRUE	117.333	-4.69811	1.17823	NA	NA	NA	NA	-4.69811	1.17823
9	*	4	I	F	G	2	2	2	TRUE	164	-3.33998	0.847201	-4.23326	0.923137	NA	NA	-3.74837	0.624183
9	*	4	L	F	G	2	2	2	TRUE	96.6667	-3.16013	0.790817	-1.94343	0.88882	NA	NA	-2.62253	0.590815
9	*	4	S	F	G	2	2	2	TRUE	142	-3.14034	0.721292	-5.8928	1.63563	-5.16469	1.7475	-3.78522	0.617406
9	*	4	Y	F	G	2	2	2	TRUE	157.333	-3.78182	0.66635	-4.24462	1.02899	-3.58851	1.03752	-3.84424	0.492331
9	*	5	*	R	G	2	2	2	TRUE	152	-5.80226	1.50273	-5.26749	1.73124	NA	NA	-5.57247	1.13484
9	*	5	L	R	G	2	2	2	TRUE	98	-4.38795	1.01058	-2.99102	1.34159	NA	NA	-3.88225	0.807196
9	*	5	Q	R	G	2	2	2	TRUE	132	-4.54857	0.984983	-5.14592	1.75684	NA	NA	-4.69144	0.859163
9	*	6	L	H	G	2	2	2	TRUE	138	-1.46448	0.546433	-1.93643	0.742617	-2.80802	1.04587	-1.80745	0.405667
9	*	6	Q	H	G	2	2	2	TRUE	123.667	-3.25572	0.696157	-3.58062	0.929163	-3.77185	1.26529	-3.43738	0.50989
9	*	6	R	H	G	2	2	2	TRUE	165.333	-3.3446	0.650026	-4.73337	1.07887	-4.29126	1.08736	-3.83429	0.495585
9	*	6	Y	H	G	2	2	2	TRUE	110	-3.927	0.959242	-4.04064	1.2468	NA	NA	-3.96925	0.760269
9	*	7	G	D	G	2	2	2	TRUE	110	-4.00496	0.943101	-3.66451	1.19734	NA	NA	-3.87461	0.740876
9	*	7	N	D	G	2	2	2	TRUE	90.5	-3.32834	1.12059	-3.62344	1.08452	NA	NA	-3.48072	0.77931
9	*	7	V	D	G	2	2	2	TRUE	120	-4.3955	1.0093	-4.02201	1.25267	NA	NA	-4.24848	0.785933
9	*	8	P	S	G	2	2	2	TRUE	114	NA	NA	-5.19104	1.74702	NA	NA	-5.19104	1.74702
9	*	8	T	S	G	2	2	2	TRUE	152	-2.64684	0.758444	-5.73625	1.65474	NA	NA	-3.18318	0.689472
9	A	1	G	D	G	2	2	2	FALSE	91.5	-0.847384	0.812684	0.533796	0.89254	NA	NA	-0.221333	0.600907
9	A	1	V	D	G	2	2	2	FALSE	66	-2.15436	0.918154	NA	NA	NA	NA	-2.15436	0.918154
9	A	3	G	E	G	2	2	2	FALSE	50	-0.253105	0.97413	NA	NA	NA	NA	-0.253105	0.97413
9	A	4	S	F	G	2	2	2	FALSE	93	NA	NA	-3.88093	1.29981	NA	NA	-3.88093	1.29981
9	D	1	V	D	G	3	2	2	FALSE	55	-3.91795	1.35491	NA	NA	NA	NA	-3.91795	1.35491
9	E	1	E	D	G	2	2	2	FALSE	71	-0.236037	0.768139	-1.10709	1.2166	NA	NA	-0.484306	0.649511
9	E	1	G	D	G	2	2	2	FALSE	117.5	-0.759247	0.627811	-1.80268	0.929217	NA	NA	-1.08627	0.520207
9	E	1	H	D	G	2	2	2	FALSE	65	-1.34416	0.880595	NA	NA	NA	NA	-1.34416	0.880595
9	E	1	N	D	G	2	2	2	FALSE	103.5	0.0282309	0.894517	-1.69328	0.797771	NA	NA	-0.930622	0.595386
9	E	1	V	D	G	2	2	2	FALSE	175.5	-2.36665	0.500752	-2.01871	0.931343	NA	NA	-2.28862	0.441044
9	E	2	T	A	G	2	2	2	FALSE	69	-0.990878	0.780552	-2.17713	1.31688	NA	NA	-1.29928	0.671463
9	E	2	V	A	G	2	2	2	FALSE	75	-4.2281	1.271	NA	NA	NA	NA	-4.2281	1.271
9	E	3	V	E	G	2	2	2	FALSE	88	-3.98249	1.09243	NA	NA	NA	NA	-3.98249	1.09243
9	E	4	I	F	G	2	2	2	FALSE	70	-2.01904	0.882333	NA	NA	NA	NA	-2.01904	0.882333
9	E	4	L	F	G	2	2	2	FALSE	82	-3.91187	1.10959	NA	NA	NA	NA	-3.91187	1.10959
9	E	4	S	F	G	2	2	2	FALSE	108.5	-0.908538	0.648074	-0.191485	0.941358	NA	NA	-0.677967	0.533804
9	E	4	Y	F	G	2	2	2	FALSE	128	-0.522536	0.612917	-1.904	0.872854	NA	NA	-0.978757	0.501602
9	E	5	*	R	G	2	2	2	TRUE	69	-4.6813	1.66654	-2.86434	1.18945	NA	NA	-3.47754	0.968151
9	E	5	Q	R	G	2	2	2	FALSE	66	-3.45639	1.24536	-2.2542	1.11792	NA	NA	-2.79065	0.831906
9	E	6	L	H	G	2	2	2	FALSE	96.5	-2.72094	0.765637	-3.501	1.2588	NA	NA	-2.93159	0.654142
9	E	6	Q	H	G	2	2	2	FALSE	113	-0.894959	0.720005	-0.54844	0.822516	NA	NA	-0.744627	0.54176
9	E	6	R	H	G	2	2	2	FALSE	142.5	-0.635511	0.711882	-1.668	0.705787	NA	NA	-1.1562	0.501208
9	E	6	Y	H	G	2	2	2	FALSE	66	NA	NA	-3.94383	1.56485	NA	NA	-3.94383	1.56485
9	E	7	G	D	G	2	2	2	FALSE	56	-2.6832	1.05284	NA	NA	NA	NA	-2.6832	1.05284
9	E	8	P	S	G	2	2	2	FALSE	57	0.661455	0.905035	NA	NA	NA	NA	0.661455	0.905035
9	R	1	E	D	G	2	2	2	FALSE	89	-0.419569	0.735664	NA	NA	NA	NA	-0.419569	0.735664
9	R	1	G	D	G	2	2	2	FALSE	129.5	0.921458	0.673115	0.487101	0.748264	NA	NA	0.72718	0.50043
9	R	1	N	D	G	2	2	2	FALSE	67	-0.0377699	0.840907	NA	NA	NA	NA	-0.0377699	0.840907
9	R	1	V	D	G	2	2	2	FALSE	114.5	-1.85652	0.71502	-2.16583	0.893329	NA	NA	-1.9773	0.558228
9	R	2	S	A	G	2	2	2	FALSE	61	NA	NA	-1.04419	1.21475	NA	NA	-1.04419	1.21475
9	R	4	I	F	G	2	2	2	FALSE	77	-1.66237	0.730988	-0.898951	1.26366	NA	NA	-1.47096	0.632748
9	R	4	L	F	G	2	2	2	FALSE	90.5	-0.0579154	0.668444	-0.359443	1.0977	NA	NA	-0.139481	0.57092
9	R	4	S	F	G	2	2	2	FALSE	159	-0.898149	0.544976	-1.22638	0.79451	NA	NA	-1.00317	0.449413
9	R	4	Y	F	G	2	2	2	FALSE	63	0.0187677	0.84659	0.98936	1.19947	NA	NA	0.341502	0.691663
9	R	5	*	R	G	2	2	2	TRUE	51	-4.53559	1.7024	NA	NA	NA	NA	-4.53559	1.7024
9	R	6	L	H	G	2	2	2	FALSE	68	-1.70237	0.982012	-4.16221	1.48185	NA	NA	-2.45299	0.818581
9	R	6	Q	H	G	2	2	2	FALSE	131.5	0.590576	0.801715	-1.36127	0.69614	NA	NA	-0.522243	0.525637
9	R	6	R	H	G	2	2	2	FALSE	111	0.187503	0.699833	-0.190391	0.838217	NA	NA	0.0322837	0.537211
9	R	6	Y	H	G	2	2	2	FALSE	67	-0.389614	0.845136	NA	NA	NA	NA	-0.389614	0.845136
9	R	7	G	D	G	2	2	2	FALSE	58.5	1.45422	0.934981	0.410503	1.16443	NA	NA	1.04509	0.729046
9	R	7	V	D	G	2	2	2	FALSE	58	0.123287	0.901162	NA	NA	NA	NA	0.123287	0.901162
9	R	8	A	S	G	2	2	2	FALSE	50	NA	NA	0.573187	1.31586	NA	NA	0.573187	1.31586
9	R	8	L	S	G	2	2	2	FALSE	53	-0.167335	0.945364	NA	NA	NA	NA	-0.167335	0.945364
9	R	8	T	S	G	2	2	2	FALSE	63	-0.918255	0.88128	NA	NA	NA	NA	-0.918255	0.88128
9	V	1	E	D	G	2	2	2	FALSE	93.5	-0.465078	0.633934	-0.125298	1.15134	NA	NA	-0.386032	0.555321
9	V	1	G	D	G	2	2	2	FALSE	173	0.804581	0.551822	0.836552	0.6781	NA	NA	0.817318	0.428009
9	V	1	N	D	G	2	2	2	FALSE	86.5	0.0893853	0.845937	-0.589047	0.91018	NA	NA	-0.225045	0.619636
9	V	1	V	D	G	2	2	2	FALSE	172.5	-1.39986	0.531944	-1.05696	0.74952	NA	NA	-1.285	0.433797
9	V	2	E	A	G	2	2	2	FALSE	52	NA	NA	-3.70397	1.67262	NA	NA	-3.70397	1.67262
9	V	2	T	A	G	2	2	2	FALSE	78	-0.765605	0.749169	-1.40803	1.15404	NA	NA	-0.956072	0.628373
9	V	4	I	F	G	2	2	2	FALSE	74	NA	NA	-1.02017	1.10259	NA	NA	-1.02017	1.10259
9	V	4	L	F	G	2	2	2	FALSE	86.5	-1.39956	0.787443	NA	NA	NA	NA	-1.39956	0.787443
9	V	4	S	F	G	2	2	2	FALSE	126.5	-2.03885	0.662661	-2.10234	0.879225	NA	NA	-2.06185	0.529191
9	V	4	Y	F	G	2	2	2	FALSE	89	0.183837	0.670245	-0.989107	1.08021	-0.645813	0.865801	-0.294307	0.475809
9	V	5	*	R	G	2	2	2	TRUE	52	NA	NA	-3.29604	1.55392	NA	NA	-3.29604	1.55392
9	V	5	L	R	G	2	2	2	FALSE	65	-2.19978	0.871245	-2.51816	1.36362	NA	NA	-2.29207	0.734185
9	V	5	Q	R	G	2	2	2	FALSE	60	-1.05368	0.84611	-2.42407	1.41747	NA	NA	-1.41369	0.726519
9	V	6	L	H	G	2	2	2	FALSE	61	-0.78281	0.892218	NA	NA	NA	NA	-0.78281	0.892218
9	V	6	Q	H	G	2	2	2	FALSE	79	-0.719275	0.937508	-0.153906	0.922627	NA	NA	-0.432068	0.657594
9	V	6	R	H	G	2	2	2	FALSE	133.5	-0.987248	0.608487	0.0647031	0.81392	NA	NA	-0.610097	0.48735
9	V	6	Y	H	G	2	2	2	FALSE	62	-0.587762	0.881241	NA	NA	NA	NA	-0.587762	0.881241
9	V	7	V	D	G	2	2	2	FALSE	53	-0.269989	0.946755	NA	NA	NA	NA	-0.269989	0.946755
10	*	1	E	D	Y	2	2	2	TRUE	126	-3.72466	0.823786	-3.6076	0.862323	-3.36658	1.20446	-3.60941	0.533936
10	*	1	G	D	Y	2	2	2	TRUE	238.5	-3.12949	0.56988	-3.57715	0.742581	NA	NA	-3.29542	0.452093
10	*	1	H	D	Y	2	2	2	TRUE	91	-5.11462	1.58319	NA	NA	NA	NA	-5.11462	1.58319
10	*	1	N	D	Y	2	2	2	TRUE	173.5	-3.59322	0.739699	-3.7366	0.887155	NA	NA	-3.65202	0.568126
10	*	1	V	D	Y	2	2	2	TRUE	219.667	-5.03755	0.803485	-5.29572	1.22101	-3.03951	1.03014	-4.49687	0.56236
10	*	1	Y	D	Y	2	2	2	TRUE	78.5	-3.75364	1.15161	-3.81383	1.32399	NA	NA	-3.77957	0.868908
10	*	2	E	A	Y	2	2	2	TRUE	65	-4.69811	1.66268	NA	NA	NA	NA	-4.69811	1.66268
10	*	2	S	A	Y	2	2	2	TRUE	62	NA	NA	-4.57828	1.91869	NA	NA	-4.57828	1.91869
10	*	2	T	A	Y	2	2	2	TRUE	98.5	-3.03738	1.0992	-5.39773	1.70667	NA	NA	-3.72942	0.924119
10	*	2	V	A	Y	2	2	2	TRUE	127	NA	NA	-5.59307	1.67479	NA	NA	-5.59307	1.67479
10	*	3	*	E	Y	2	2	2	TRUE	96.5	-4.09012	1.06804	-5.00762	1.78945	NA	NA	-4.33111	0.91711
10	*	3	G	E	Y	2	2	2	TRUE	79.5	-3.0523	0.926288	-3.41454	1.29417	NA	NA	-3.17501	0.753234
10	*	3	K	E	Y	2	2	2	TRUE	71	-3.76783	1.14763	-3.09544	1.29155	NA	NA	-3.47117	0.857886
10	*	3	V	E	Y	2	2	2	TRUE	178.5	-5.93164	1.49255	-3.85462	1.01481	NA	NA	-4.51125	0.839207
10	*	4	I	F	Y	2	2	2	TRUE	116.5	-3.6618	0.775864	-3.4891	1.26355	NA	NA	-3.61451	0.661169
10	*	4	L	F	Y	2	2	2	TRUE	146	-5.15531	1.13244	-2.69692	1.11969	NA	NA	-3.91219	0.796211
10	*	4	S	F	Y	2	2	2	TRUE	140	-3.9419	0.783183	-4.11704	0.948572	-3.78938	1.25809	-3.97104	0.544453
10	*	4	Y	F	Y	2	2	2	TRUE	138.5	-3.82264	0.804634	-2.51027	0.906042	NA	NA	-3.24398	0.601634
10	*	5	*	R	Y	2	2	2	TRUE	78.5	NA	NA	-4.51119	1.94332	NA	NA	-4.51119	1.94332
10	*	5	L	R	Y	2	2	2	TRUE	97	-4.12027	1.06158	-4.28885	1.43962	NA	NA	-4.17965	0.8544
10	*	5	Q	R	Y	2	2	2	TRUE	111	-3.23256	0.87491	-4.58636	1.35538	NA	NA	-3.63075	0.735067
10	*	6	L	H	Y	2	2	2	TRUE	200.5	-4.87113	0.943058	-4.06975	0.959579	NA	NA	-4.4774	0.672608
10	*	6	Q	H	Y	2	2	2	TRUE	153	-3.62767	0.782659	-3.92537	0.995679	NA	NA	-3.74136	0.615317
10	*	6	R	H	Y	2	2	2	TRUE	148.667	-3.19902	0.742024	-4.03932	0.817817	-4.50241	1.42805	-3.69761	0.512873
10	*	6	Y	H	Y	2	2	2	TRUE	83	-2.45765	0.844358	NA	NA	NA	NA	-2.45765	0.844358
10	*	7	G	D	Y	2	2	2	TRUE	107.5	-3.44673	0.886386	-4.47588	1.38437	NA	NA	-3.74597	0.746482
10	*	7	N	D	Y	2	2	2	TRUE	75.5	-5.10357	1.58494	NA	NA	NA	NA	-5.10357	1.58494
10	*	7	V	D	Y	2	2	2	TRUE	77	-4.94757	1.61161	NA	NA	NA	NA	-4.94757	1.61161
10	*	8	P	S	Y	2	2	2	TRUE	96	NA	NA	-3.62344	1.21213	NA	NA	-3.62344	1.21213
10	*	8	T	S	Y	2	2	2	TRUE	101.5	-4.78581	1.16466	-2.63666	1.21615	NA	NA	-3.75769	0.841152
10	*	9	*	G	Y	2	2	2	TRUE	146.667	-5.14172	1.11917	-2.41645	0.739692	NA	NA	-3.24499	0.617091
10	*	9	E	G	Y	2	2	2	TRUE	61	-4.71464	1.65895	NA	NA	NA	NA	-4.71464	1.65895
10	*	9	R	G	Y	2	2	2	TRUE	97	-4.83787	1.15708	NA	NA	NA	NA	-4.83787	1.15708
10	*	9	V	G	Y	2	2	2	TRUE	53	NA	NA	-4.42049	1.97879	NA	NA	-4.42049	1.97879
10	C	1	E	D	Y	2	2	2	FALSE	187.667	0.396645	0.497542	-0.956457	0.560627	0.537194	0.884119	-0.0886488	0.342986
10	C	1	G	D	Y	2	2	2	FALSE	115.5	-0.0998567	0.643505	-0.527246	0.877304	NA	NA	-0.249364	0.518883
10	C	1	N	D	Y	2	2	2	FALSE	119.5	1.09023	0.679023	0.293054	0.797706	NA	NA	0.755301	0.517063
10	C	1	V	D	Y	2	2	2	FALSE	282	-2.64593	0.452129	-2.81846	0.669776	NA	NA	-2.69994	0.374739
10	C	1	Y	D	Y	2	2	2	FALSE	56	-0.380618	0.957375	-1.02756	1.22433	NA	NA	-0.626096	0.754176
10	C	2	E	A	Y	2	2	2	FALSE	59.5	-1.97204	0.990311	-1.64791	1.2088	NA	NA	-1.84186	0.766057
10	C	2	S	A	Y	2	2	2	FALSE	51	NA	NA	-2.17123	1.3915	NA	NA	-2.17123	1.3915
10	C	2	T	A	Y	2	2	2	FALSE	96	-0.105403	0.651793	0.744117	0.850035	-0.563843	1.04543	0.0571333	0.463599
10	C	2	V	A	Y	2	2	2	FALSE	96	-2.54967	0.786241	-1.1672	0.982239	NA	NA	-2.00979	0.613814
10	C	3	D	E	Y	2	2	2	FALSE	71.5	-0.983251	0.805149	-3.55103	1.43053	NA	NA	-1.60099	0.701648
10	C	3	G	E	Y	2	2	2	FALSE	106	0.329526	0.584938	0.45002	1.09778	NA	NA	0.356171	0.516228
10	C	3	K	E	Y	2	2	2	FALSE	76	NA	NA	-1.8752	1.12112	NA	NA	-1.8752	1.12112
10	C	3	V	E	Y	2	2	2	FALSE	123	-1.95909	0.588576	0.23854	0.8352	-3.67062	1.00972	-1.68147	0.434328
10	C	4	I	F	Y	2	2	2	FALSE	98	-0.725123	0.832663	-2.38382	0.900166	NA	NA	-1.48995	0.611254
10	C	4	L	F	Y	2	2	2	FALSE	180	-1.08995	0.501913	-0.678539	0.757703	NA	NA	-0.964481	0.418436
10	C	4	S	F	Y	2	2	2	FALSE	158.667	-0.743524	0.468515	-1.08165	0.740878	-0.235381	0.877129	-0.737731	0.360907
10	C	4	Y	F	Y	2	2	2	FALSE	168.333	-1.15508	0.49481	-1.68402	0.676724	0.199724	0.840243	-1.05566	0.360741
10	C	5	*	R	Y	2	2	2	TRUE	79.5	-3.20115	0.883413	-3.23111	1.3763	NA	NA	-3.20989	0.74344
10	C	5	L	R	Y	2	2	2	FALSE	84.5	-0.160909	0.824289	-2.73255	1.04765	NA	NA	-1.14419	0.647812
10	C	5	Q	R	Y	2	2	2	FALSE	154	-0.646321	0.584798	-1.62115	0.755844	NA	NA	-1.01135	0.462524
10	C	6	L	H	Y	2	2	2	FALSE	223	-2.22117	0.481855	-1.77024	0.69982	NA	NA	-2.07614	0.396876
10	C	6	N	H	Y	2	2	2	FALSE	73	NA	NA	-3.12339	1.27871	NA	NA	-3.12339	1.27871
10	C	6	Q	H	Y	2	2	2	FALSE	207	-0.261703	0.442399	0.0292096	0.742249	NA	NA	-0.185447	0.380019
10	C	6	R	H	Y	2	2	2	FALSE	226	-0.310163	0.388858	0.161967	0.607092	-0.193043	0.790665	-0.175774	0.302528
10	C	6	Y	H	Y	2	2	2	FALSE	80	NA	NA	-0.253201	1.04745	NA	NA	-0.253201	1.04745
10	C	7	G	D	Y	2	2	2	FALSE	55.5	-0.0893065	0.927302	-0.307596	1.25206	NA	NA	-0.166629	0.745183
10	C	7	V	D	Y	2	2	2	FALSE	71.5	-0.682899	0.727583	-0.994051	1.32671	NA	NA	-0.754842	0.637948
10	C	8	L	S	Y	2	2	2	FALSE	55.5	-0.532303	0.942286	0.297394	1.23452	NA	NA	-0.226867	0.749026
10	C	8	P	S	Y	2	2	2	FALSE	92	-0.104268	0.817959	-1.82975	0.918042	NA	NA	-0.867861	0.610715
10	C	8	T	S	Y	2	2	2	FALSE	81.5	0.65993	0.775753	0.791088	1.00903	NA	NA	0.708654	0.615005
10	C	9	*	G	Y	2	2	2	TRUE	91	-5.0811	1.58856	-3.89169	1.29604	NA	NA	-4.36701	1.00422
10	C	9	E	G	Y	2	2	2	FALSE	58	-1.00064	0.920122	NA	NA	NA	NA	-1.00064	0.920122
10	C	9	V	G	Y	2	2	2	FALSE	93	NA	NA	-4.28885	1.43962	NA	NA	-4.28885	1.43962
10	D	1	G	D	Y	2	2	2	FALSE	51	NA	NA	-2.57915	1.43664	NA	NA	-2.57915	1.43664
10	F	1	E	D	Y	2	2	2	FALSE	188	-0.0464907	0.450419	-0.623135	0.59407	0.321464	0.951679	-0.184947	0.335829
10	F	1	G	D	Y	2	2	2	FALSE	145.5	0.573839	0.572204	0.225119	0.775872	NA	NA	0.450988	0.460512
10	F	1	N	D	Y	2	2	2	FALSE	224	-0.49086	0.447325	0.803908	0.664387	NA	NA	-0.0869963	0.371059
10	F	1	V	D	Y	2	2	2	FALSE	286.5	-0.73344	0.416111	-0.941232	0.571334	NA	NA	-0.805459	0.336357
10	F	2	E	A	Y	2	2	2	FALSE	84.5	-0.331828	0.773951	-1.28231	1.01258	NA	NA	-0.682337	0.614904
10	F	2	P	A	Y	2	2	2	FALSE	69	-0.946048	0.843371	NA	NA	NA	NA	-0.946048	0.843371
10	F	2	S	A	Y	2	2	2	FALSE	70	-0.207866	0.824823	NA	NA	NA	NA	-0.207866	0.824823
10	F	2	T	A	Y	2	2	2	FALSE	112	-1.59026	0.66514	-0.494828	0.913197	NA	NA	-1.21055	0.537643
10	F	2	V	A	Y	2	2	2	FALSE	78	-0.47141	0.676132	-1.45395	1.35725	NA	NA	-0.666762	0.605195
10	F	3	*	E	Y	2	2	2	TRUE	72	-4.18728	1.2809	NA	NA	NA	NA	-4.18728	1.2809
10	F	3	G	E	Y	2	2	2	FALSE	71.5	0.510599	0.862365	-2.17964	1.11225	NA	NA	-0.499438	0.681517
10	F	3	K	E	Y	2	2	2	FALSE	82	NA	NA	0.620237	1.028	NA	NA	0.620237	1.028
10	F	3	V	E	Y	2	2	2	FALSE	88.5	-0.891444	0.664417	-1.7179	1.20306	NA	NA	-1.0846	0.581614
10	F	4	I	F	Y	2	2	2	FALSE	213	-0.865772	0.426955	0.345319	0.77794	NA	NA	-0.585421	0.37429
10	F	4	L	F	Y	2	2	2	FALSE	191.667	-0.281246	0.458529	-1.35017	0.562833	NA	NA	-0.707672	0.355491
10	F	4	S	F	Y	2	2	2	FALSE	155	0.187447	0.541154	-2.29026	0.654471	0.503377	0.970899	-0.612729	0.383194
10	F	4	Y	F	Y	2	2	2	FALSE	121.333	0.289755	0.564188	-0.426094	0.883779	-1.34419	0.810033	-0.283188	0.4101
10	F	5	*	R	Y	2	2	2	TRUE	74.5	-2.76708	0.856627	-2.36772	1.28012	NA	NA	-2.64356	0.71193
10	F	5	L	R	Y	2	2	2	FALSE	132.5	-1.03569	0.611568	-3.23882	0.971582	NA	NA	-1.66089	0.517569
10	F	5	Q	R	Y	2	2	2	FALSE	115.5	-0.585243	0.674509	-2.48622	0.91499	NA	NA	-1.25456	0.542931
10	F	6	L	H	Y	2	2	2	FALSE	288.5	-0.202781	0.411008	-2.54372	0.61478	NA	NA	-0.925881	0.341683
10	F	6	Q	H	Y	2	2	2	FALSE	218.667	-0.277268	0.439277	-0.686527	0.512442	0.615469	1.03954	-0.351128	0.317567
10	F	6	R	H	Y	2	2	2	FALSE	168	-0.374187	0.561575	-0.477407	0.699797	NA	NA	-0.41462	0.437986
10	F	6	Y	H	Y	2	2	2	FALSE	104.5	0.15001	0.611812	0.348919	1.03581	NA	NA	0.201457	0.526782
10	F	7	E	D	Y	2	2	2	FALSE	53	NA	NA	-1.696	1.33073	NA	NA	-1.696	1.33073
10	F	7	G	D	Y	2	2	2	FALSE	66	0.269357	0.814703	1.11423	1.18917	NA	NA	0.539237	0.672102
10	F	7	N	D	Y	2	2	2	FALSE	64.5	-0.603762	0.836345	0.382278	1.20271	NA	NA	-0.282366	0.686646
10	F	7	V	D	Y	2	2	2	FALSE	86.5	-0.271859	0.71458	-1.80815	1.09608	NA	NA	-0.73007	0.598604
10	F	8	*	S	Y	2	2	2	TRUE	51	-2.92615	1.14107	NA	NA	NA	NA	-2.92615	1.14107
10	F	8	L	S	Y	2	2	2	FALSE	68	NA	NA	-0.471489	1.13886	NA	NA	-0.471489	1.13886
10	F	8	P	S	Y	2	2	2	FALSE	110.5	-0.0402925	0.656951	-0.205261	0.893391	NA	NA	-0.0981897	0.52926
10	F	8	T	S	Y	2	2	2	FALSE	87	NA	NA	-1.64124	1.03698	NA	NA	-1.64124	1.03698
10	F	9	*	G	Y	2	2	2	TRUE	124.333	-4.44321	0.868943	-4.62582	1.34564	-4.09838	1.31053	-4.40257	0.637719
10	F	9	E	G	Y	2	2	2	FALSE	69	-2.00385	0.863314	-0.84179	1.17181	NA	NA	-1.59501	0.695052
10	F	9	R	G	Y	2	2	2	FALSE	51	-1.47126	1.00789	0.26154	1.29267	NA	NA	-0.816122	0.794838
10	F	9	V	G	Y	2	2	2	FALSE	50	NA	NA	-1.39955	1.35478	NA	NA	-1.39955	1.35478
10	H	1	E	D	Y	2	2	2	FALSE	169.5	0.109884	0.535379	0.414441	0.716097	NA	NA	0.219081	0.428789
10	H	1	G	D	Y	2	2	2	FALSE	95.3333	0.162997	0.80993	-1.17936	0.783934	0.0680135	0.959013	-0.376657	0.485705
10	H	1	N	D	Y	2	2	2	FALSE	133	0.326176	0.604035	0.233291	0.803875	NA	NA	0.292657	0.482902
10	H	1	V	D	Y	2	2	2	FALSE	129	-2.35067	0.730667	-3.24985	0.912786	NA	NA	-2.70183	0.570421
10	H	2	E	A	Y	2	2	2	FALSE	50	NA	NA	-2.0453	1.39437	NA	NA	-2.0453	1.39437
10	H	2	T	A	Y	2	2	2	FALSE	103	0.8741	0.80044	-1.74086	0.843053	NA	NA	-0.365623	0.580477
10	H	2	V	A	Y	2	2	2	FALSE	90.5	0.65993	0.848388	-1.33502	0.888846	NA	NA	-0.29111	0.613705
10	H	3	G	E	Y	2	2	2	FALSE	82	NA	NA	-1.25429	1.05391	NA	NA	-1.25429	1.05391
10	H	3	K	E	Y	2	2	2	FALSE	79.5	0.130207	0.703775	1.18991	1.16995	NA	NA	0.411777	0.603072
10	H	3	V	E	Y	2	2	2	FALSE	84.6667	-0.766281	0.780602	-3.34513	1.18462	-1.80832	0.887265	-1.63862	0.5253
10	H	4	I	F	Y	2	2	2	FALSE	67.6667	0.665196	0.818023	-1.34183	1.05666	-0.955584	1.08657	-0.314207	0.555809
10	H	4	L	F	Y	2	2	2	FALSE	91	-0.14358	0.567665	-0.48049	1.24376	NA	NA	-0.201663	0.51642
10	H	4	S	F	Y	2	2	2	FALSE	155.667	-0.454501	0.491944	0.0781584	0.647848	-0.435161	1.06221	-0.280705	0.367583
10	H	4	V	F	Y	2	2	2	FALSE	56	NA	NA	-2.67325	1.38354	NA	NA	-2.67325	1.38354
10	H	4	Y	F	Y	2	2	2	FALSE	109	0.0233419	0.601369	0.333587	0.809336	0.28352	0.992789	0.162346	0.434111
10	H	5	L	R	Y	2	2	2	FALSE	82.5	-0.821485	0.729977	0.863381	1.08822	NA	NA	-0.29862	0.606219
10	H	5	Q	R	Y	2	2	2	FALSE	116	-2.25059	0.723791	-0.834021	0.852769	NA	NA	-1.65742	0.551824
10	H	6	L	H	Y	2	2	2	FALSE	184.5	-1.84345	0.456838	-0.518084	0.926642	NA	NA	-1.5843	0.409749
10	H	6	Q	H	Y	2	2	2	FALSE	123	0.280924	0.725282	-0.863469	0.758182	NA	NA	-0.265905	0.524097
10	H	6	R	H	Y	2	2	2	FALSE	81	-0.402392	0.611609	-0.0725633	1.23805	-0.89766	1.04031	-0.459441	0.485085
10	H	6	Y	H	Y	2	2	2	FALSE	81.5	1.05114	0.738106	-0.67707	1.07374	NA	NA	0.496555	0.608255
10	H	7	G	D	Y	2	2	2	FALSE	65.5	1.12346	0.80501	-0.225757	1.21878	NA	NA	0.713636	0.671714
10	H	7	N	D	Y	2	2	2	FALSE	53	1.47332	0.934933	NA	NA	NA	NA	1.47332	0.934933
10	H	7	V	D	Y	2	2	2	FALSE	161	-0.913327	0.56982	-0.870609	0.73089	NA	NA	-0.897178	0.449386
10	H	8	L	S	Y	2	2	2	FALSE	94	-0.428129	0.623611	0.898348	1.171	NA	NA	-0.135054	0.550425
10	H	8	P	S	Y	2	2	2	FALSE	109	0.428436	0.753677	-1.72831	0.836352	NA	NA	-0.538097	0.559884
10	H	8	T	S	Y	2	2	2	FALSE	92.3333	0.208337	0.706845	-0.148715	0.834552	-0.78008	1.03896	-0.118984	0.478711
10	H	9	*	G	Y	2	2	2	TRUE	78.5	-2.64064	0.944586	NA	NA	NA	NA	-2.64064	0.944586
10	L	6	R	H	Y	3	2	2	FALSE	84	NA	NA	-1.56796	1.05222	NA	NA	-1.56796	1.05222
10	N	1	E	D	Y	2	2	2	FALSE	149	-0.402437	0.592131	-0.78998	0.591141	0.890304	1.07542	-0.401106	0.389888
10	N	1	G	D	Y	2	2	2	FALSE	150	0.657232	0.626251	0.339172	0.698309	NA	NA	0.515454	0.466228
10	N	1	H	D	Y	2	2	2	FALSE	54	NA	NA	-1.47698	1.30717	NA	NA	-1.47698	1.30717
10	N	1	N	D	Y	2	2	2	FALSE	87.5	0.595806	0.71968	0.0733561	1.01917	NA	NA	0.421972	0.587883
10	N	1	V	D	Y	2	2	2	FALSE	226	-1.89009	0.375118	-1.84941	0.669086	-0.93908	1.04941	-1.79696	0.312372
10	N	1	Y	D	Y	2	2	2	FALSE	98.5	-0.497702	0.585052	1.70927	1.26208	NA	NA	-0.107333	0.530794
10	N	2	E	A	Y	2	2	2	FALSE	60	NA	NA	-2.33473	1.29796	NA	NA	-2.33473	1.29796
10	N	2	S	A	Y	2	2	2	FALSE	77	-0.565541	0.791877	NA	NA	NA	NA	-0.565541	0.791877
10	N	2	T	A	Y	2	2	2	FALSE	136	-0.584592	0.563704	-0.2747	0.867034	NA	NA	-0.49252	0.472601
10	N	2	V	A	Y	2	2	2	FALSE	133	-2.15258	0.595528	-2.53732	0.993723	NA	NA	-2.25424	0.510821
10	N	3	D	E	Y	2	2	2	FALSE	58	-0.638853	0.911643	NA	NA	NA	NA	-0.638853	0.911643
10	N	3	G	E	Y	2	2	2	FALSE	74	0.0409329	0.800129	NA	NA	NA	NA	0.0409329	0.800129
10	N	3	K	E	Y	2	2	2	FALSE	62	NA	NA	-2.26172	1.27011	NA	NA	-2.26172	1.27011
10	N	3	V	E	Y	2	2	2	FALSE	119.667	-0.335498	0.583444	-0.127848	0.786241	-1.55137	0.927461	-0.523959	0.418199
10	N	4	I	F	Y	2	2	2	FALSE	91.5	0.35175	0.819824	-1.79444	0.916499	NA	NA	-0.60222	0.611033
10	N	4	L	F	Y	2	2	2	FALSE	273.5	-1.02201	0.448345	-1.76409	0.568977	NA	NA	-1.30628	0.352153
10	N	4	S	F	Y	2	2	2	FALSE	160.333	-0.25674	0.46535	-0.478506	0.671017	0.276713	1.04057	-0.256722	0.358925
10	N	4	Y	F	Y	2	2	2	FALSE	145	-0.813279	0.551404	0.760943	0.829601	NA	NA	-0.330921	0.45922
10	N	5	*	R	Y	2	2	2	TRUE	75	NA	NA	-3.15058	1.26643	NA	NA	-3.15058	1.26643
10	N	5	L	R	Y	2	2	2	FALSE	92.5	-1.26412	0.650252	-0.282125	1.16204	NA	NA	-1.02995	0.567451
10	N	5	Q	R	Y	2	2	2	FALSE	109	-0.363621	0.589709	-0.080236	1.0589	NA	NA	-0.296536	0.515203
10	N	6	L	H	Y	2	2	2	FALSE	139	-2.2132	0.558135	-0.540544	0.975294	NA	NA	-1.80055	0.48442
10	N	6	Q	H	Y	2	2	2	FALSE	142.5	-0.0249038	0.620038	-0.030823	0.740321	NA	NA	-0.0273441	0.475345
10	N	6	R	H	Y	2	2	2	FALSE	184	-0.270122	0.493957	-0.426094	0.73	NA	NA	-0.319107	0.409101
10	N	6	Y	H	Y	2	2	2	FALSE	69	NA	NA	-1.83549	1.17413	NA	NA	-1.83549	1.17413
10	N	7	E	D	Y	2	2	2	FALSE	102	-0.528254	0.969166	-1.16919	0.845277	NA	NA	-0.892284	0.637029
10	N	7	G	D	Y	2	2	2	FALSE	97	-0.845774	0.678535	1.14576	0.996232	NA	NA	-0.21467	0.560811
10	N	7	V	D	Y	2	2	2	FALSE	79	0.631302	0.905202	-1.9147	0.974975	NA	NA	-0.54735	0.663371
10	N	7	Y	D	Y	2	2	2	FALSE	54	1.17558	0.927221	NA	NA	NA	NA	1.17558	0.927221
10	N	8	L	S	Y	2	2	2	FALSE	76	NA	NA	-1.9937	1.12821	NA	NA	-1.9937	1.12821
10	N	8	P	S	Y	2	2	2	FALSE	78.5	0.153101	0.788804	-3.74194	1.35121	NA	NA	-0.836917	0.681221
10	N	8	T	S	Y	2	2	2	FALSE	102	0.804172	0.765571	-1.05709	0.717097	0.333281	1.08676	-0.0892535	0.471532
10	N	9	*	G	Y	2	2	2	TRUE	111	-3.9143	0.861794	-3.79043	1.33269	NA	NA	-3.87778	0.72367
10	N	9	R	G	Y	2	2	2	FALSE	71.5	0.0568091	0.7796	NA	NA	NA	NA	0.0568091	0.7796
10	N	9	V	G	Y	2	2	2	FALSE	140	-2.50088	0.656929	NA	NA	NA	NA	-2.50088	0.656929
10	S	6	Q	H	Y	2	2	2	FALSE	95	-0.43914	0.712825	NA	NA	NA	NA	-0.43914	0.712825
10	S	6	R	H	Y	2	2	2	FALSE	57	-1.18108	0.933574	NA	NA	NA	NA	-1.18108	0.933574
11	*	1	E	D	E	2	2	2	TRUE	58	-2.58476	1.02218	NA	NA	NA	NA	-2.58476	1.02218
11	*	1	G	D	E	2	2	2	TRUE	113	NA	NA	-3.37954	1.06945	NA	NA	-3.37954	1.06945
11	*	1	N	D	E	2	2	2	TRUE	57	NA	NA	-3.79633	1.62892	NA	NA	-3.79633	1.62892
11	*	3	V	E	E	2	2	2	TRUE	64	-3.78182	1.14375	-4.47588	1.95683	NA	NA	-3.95855	0.987451
11	*	4	I	F	E	2	2	2	TRUE	63	-3.13746	1.0641	NA	NA	NA	NA	-3.13746	1.0641
11	*	4	L	F	E	2	2	2	TRUE	54	NA	NA	-4.43929	1.97123	NA	NA	-4.43929	1.97123
11	*	4	S	F	E	2	2	2	TRUE	94	NA	NA	-4.29961	1.43622	NA	NA	-4.29961	1.43622
11	*	4	Y	F	E	2	2	2	TRUE	58	-3.56559	1.20852	NA	NA	NA	NA	-3.56559	1.20852
11	*	5	L	R	E	2	2	2	TRUE	70	NA	NA	-3.30567	1.34172	NA	NA	-3.30567	1.34172
11	*	5	Q	R	E	2	2	2	TRUE	59	-3.98815	1.33408	NA	NA	NA	NA	-3.98815	1.33408
11	*	6	L	H	E	2	2	2	TRUE	95	-5.11462	1.58319	-5.04911	1.77926	NA	NA	-5.08567	1.18276
11	*	6	Q	H	E	2	2	2	TRUE	82.5	-4.52574	1.20809	-3.50494	1.45129	NA	NA	-4.10792	0.928495
11	*	6	Y	H	E	2	2	2	TRUE	52	NA	NA	-4.40132	1.98662	NA	NA	-4.40132	1.98662
11	*	8	P	S	E	2	2	2	TRUE	54	NA	NA	-1.20088	1.29602	NA	NA	-1.20088	1.29602
11	*	8	T	S	E	2	2	2	TRUE	57	-3.5482	1.21419	NA	NA	NA	NA	-3.5482	1.21419
11	*	9	*	G	E	2	2	2	TRUE	62.5	-4.03775	1.32004	NA	NA	NA	NA	-4.03775	1.32004
11	*	10	*	Y	E	2	2	2	TRUE	51	-3.84244	1.37862	NA	NA	NA	NA	-3.84244	1.37862
11	*	10	F	Y	E	2	2	2	TRUE	58.5	-3.26052	1.14368	-3.84794	1.60572	NA	NA	-3.45822	0.931546
11	*	10	N	Y	E	2	2	2	TRUE	53	NA	NA	-4.42049	1.97879	NA	NA	-4.42049	1.97879
11	A	1	E	D	E	2	2	2	FALSE	110	-0.861591	0.669737	NA	NA	NA	NA	-0.861591	0.669737
11	A	2	T	A	E	2	2	2	FALSE	51	NA	NA	-2.76258	1.46305	NA	NA	-2.76258	1.46305
11	A	4	L	F	E	2	2	2	FALSE	52	-0.269989	0.946755	0.365354	1.30439	NA	NA	-0.0507691	0.766204
11	A	4	Y	F	E	2	2	2	FALSE	70	NA	NA	-0.916348	1.13099	NA	NA	-0.916348	1.13099
11	A	6	R	H	E	2	2	2	FALSE	55	-0.0893065	0.927302	NA	NA	NA	NA	-0.0893065	0.927302
11	A	10	N	Y	E	2	2	2	FALSE	51	-1.40009	0.994864	NA	NA	NA	NA	-1.40009	0.994864
11	D	1	A	D	E	2	2	2	FALSE	55	0.372512	0.922967	NA	NA	NA	NA	0.372512	0.922967
11	D	1	E	D	E	2	2	2	FALSE	371	NA	NA	NA	NA	-0.396169	0.530955	-0.396169	0.530955
11	D	1	G	D	E	2	2	2	FALSE	322	0.56976	0.341011	0.896332	0.453465	NA	NA	0.687729	0.272546
11	D	1	H	D	E	2	2	2	FALSE	86	-0.144808	0.724699	0.337355	1.03588	NA	NA	0.0136327	0.593809
11	D	1	N	D	E	2	2	2	FALSE	253.667	0.629315	0.357686	NA	NA	NA	NA	0.629315	0.357686
11	D	1	V	D	E	2	2	2	FALSE	570	-1.41415	0.282618	-1.58629	0.364506	-1.66927	0.513905	-1.50904	0.204839
11	D	1	Y	D	E	2	2	2	FALSE	88	0.280441	0.706386	1.11569	1.03242	NA	NA	0.546769	0.582987
11	D	2	E	A	E	2	2	2	FALSE	71	0.452291	0.914243	0.486356	1.00457	NA	NA	0.467723	0.676151
11	D	2	G	A	E	2	2	2	FALSE	65	-0.619266	0.861546	NA	NA	NA	NA	-0.619266	0.861546
11	D	2	P	A	E	2	2	2	FALSE	90	0.078212	0.726698	NA	NA	NA	NA	0.078212	0.726698
11	D	2	S	A	E	2	2	2	FALSE	94	-0.0655908	0.688056	0.538769	0.998531	NA	NA	0.128982	0.566572
11	D	2	T	A	E	2	2	2	FALSE	212	-0.508148	0.412309	0.0374035	0.570924	0.352794	0.951583	-0.247126	0.315367
11	D	2	V	A	E	2	2	2	FALSE	155.667	-0.479409	0.554856	NA	NA	NA	NA	-0.479409	0.554856
11	D	3	*	E	E	2	2	2	TRUE	92	-2.63191	0.899674	-3.06304	1.03374	-4.5348	1.17079	-3.24956	0.587142
11	D	3	A	E	E	2	2	2	FALSE	54	NA	NA	1.58602	1.26234	NA	NA	1.58602	1.26234
11	D	3	D	E	E	2	2	2	FALSE	97.6667	-0.504942	0.608316	NA	NA	NA	NA	-0.504942	0.608316
11	D	3	G	E	E	2	2	2	FALSE	197.333	0.713464	0.454721	-0.091863	0.572617	0.704511	0.84736	0.447421	0.328288
11	D	3	K	E	E	2	2	2	FALSE	90.3333	0.849395	0.70736	0.422919	0.830949	-0.0436465	1.07856	0.527709	0.481881
11	D	3	V	E	E	2	2	2	FALSE	258	NA	NA	-0.221749	0.522799	-1.83885	0.574131	-0.954793	0.386551
11	D	4	I	F	E	2	2	2	FALSE	226.333	-0.551424	0.391476	0.159498	0.639909	1.43272	0.714904	-0.0371055	0.30256
11	D	4	L	F	E	2	2	2	FALSE	496.333	-1.13092	0.299909	-0.299949	0.377224	-0.234043	0.497406	-0.704339	0.212299
11	D	4	S	F	E	2	2	2	FALSE	375.333	NA	NA	-0.491403	0.439161	NA	NA	-0.491403	0.439161
11	D	4	Y	F	E	2	2	2	FALSE	347.667	NA	NA	NA	NA	-0.519596	0.486731	-0.519596	0.486731
11	D	5	*	R	E	2	2	2	TRUE	108	-3.05333	0.710737	-2.68346	0.903282	-2.21623	1.10182	-2.76967	0.4982
11	D	5	G	R	E	2	2	2	FALSE	62	NA	NA	-2.77565	1.32905	NA	NA	-2.77565	1.32905
11	D	5	L	R	E	2	2	2	FALSE	176.667	-1.23181	0.482181	-1.34795	0.601456	-0.699267	1.0739	-1.21407	0.355053
11	D	5	P	R	E	2	2	2	FALSE	64	-2.80099	1.08905	-1.96687	1.14161	NA	NA	-2.40357	0.788002
11	D	5	Q	R	E	2	2	2	FALSE	197	-1.29699	0.500452	-1.39551	0.557639	NA	NA	-1.34094	0.372455
11	D	6	D	H	E	2	2	2	FALSE	81.5	-1.01391	0.681733	-1.08814	1.26902	NA	NA	-1.03054	0.600559
11	D	6	L	H	E	2	2	2	FALSE	257.333	-0.749888	0.395243	-1.97115	0.525676	-1.16293	0.85344	-1.18757	0.296264
11	D	6	N	H	E	2	2	2	FALSE	56	NA	NA	-0.444222	1.25418	NA	NA	-0.444222	1.25418
11	D	6	P	H	E	2	2	2	FALSE	50	NA	NA	-1.08399	1.3427	NA	NA	-1.08399	1.3427
11	D	6	Q	H	E	2	2	2	FALSE	301.667	0.280075	0.376232	1.09413	0.443676	0.0325746	0.786607	0.551532	0.269574
11	D	6	R	H	E	2	2	2	FALSE	315	0.61394	0.36362	-0.196136	0.449119	NA	NA	0.293188	0.282607
11	D	6	Y	H	E	2	2	2	FALSE	165.667	0.110376	0.541559	-0.976345	0.620213	-1.5832	0.824509	-0.600338	0.365629
11	D	7	E	D	E	2	2	2	FALSE	131	-0.0187768	0.54238	NA	NA	NA	NA	-0.0187768	0.54238
11	D	7	G	D	E	2	2	2	FALSE	203.667	0.432869	0.458646	NA	NA	NA	NA	0.432869	0.458646
11	D	7	N	D	E	2	2	2	FALSE	160.333	0.0438288	0.447391	-0.228395	0.709469	1.19025	1.00584	0.118136	0.354192
11	D	7	V	D	E	2	2	2	FALSE	178.667	-1.6742	0.506022	-0.84968	0.58954	-0.567384	0.956214	-1.21931	0.35632
11	D	7	Y	D	E	2	2	2	FALSE	99.5	-0.292326	0.680412	0.342788	0.956773	NA	NA	-0.0790075	0.554494
11	D	8	A	S	E	2	2	2	FALSE	75	NA	NA	-0.756593	1.0894	NA	NA	-0.756593	1.0894
11	D	8	L	S	E	2	2	2	FALSE	90.5	-0.41655	0.688257	-0.519439	1.05755	NA	NA	-0.447163	0.576853
11	D	8	P	S	E	2	2	2	FALSE	234.333	0.484667	0.390022	0.537978	0.558945	0.0496008	0.821166	0.442513	0.298041
11	D	8	T	S	E	2	2	2	FALSE	173	-0.0774603	0.475198	0.931843	0.655879	0.211276	0.802679	0.259005	0.346998
11	D	9	*	G	E	2	2	2	TRUE	136.333	-2.57531	0.624706	-3.89169	0.917474	-2.16817	1.01602	-2.82312	0.46033
11	D	9	E	G	E	2	2	2	FALSE	96.6667	0.0671268	0.55152	-0.820516	1.09801	-0.419694	1.02742	-0.169317	0.444362
11	D	9	R	G	E	2	2	2	FALSE	140	0.574659	0.497164	0.434727	0.712846	NA	NA	0.528868	0.407783
11	D	9	V	G	E	2	2	2	FALSE	82	-0.915541	0.933869	-2.7242	1.00234	NA	NA	-1.75599	0.683269
11	D	10	*	Y	E	2	2	2	TRUE	179.667	-3.6526	0.623864	-3.95681	0.835228	-3.28508	1.02925	-3.67062	0.449613
11	D	10	C	Y	E	2	2	2	FALSE	190.333	0.143974	0.406258	1.07304	0.775483	-0.466737	0.732933	0.186552	0.323029
11	D	10	F	Y	E	2	2	2	FALSE	169.667	-0.456309	0.482025	-0.16944	0.613948	1.55427	0.9904	-0.103918	0.354077
11	D	10	H	Y	E	2	2	2	FALSE	171	-0.234229	0.536074	0.114309	0.62443	-0.970546	0.751476	-0.286688	0.357708
11	D	10	N	Y	E	2	2	2	FALSE	104.333	0.7745	0.616054	0.448219	0.862026	-0.46214	0.931026	0.41111	0.441327
11	G	1	E	D	E	2	2	2	FALSE	279	0.177426	0.373234	0.0375182	0.489408	0.830502	0.784837	0.214116	0.277595
11	G	1	G	D	E	2	2	2	FALSE	285.333	1.23989	0.411336	0.544624	0.450437	0.95287	0.713094	0.928213	0.279448
11	G	1	N	D	E	2	2	2	FALSE	178	0.99045	0.464458	0.754502	0.587095	1.34683	1.02975	0.949358	0.343404
11	G	1	V	D	E	2	2	2	FALSE	238	-0.919929	0.434091	-1.01065	0.554676	-2.20065	0.707793	-1.19012	0.307827
11	G	1	Y	D	E	2	2	2	FALSE	93	NA	NA	-0.991815	0.983295	NA	NA	-0.991815	0.983295
11	G	2	E	A	E	2	2	2	FALSE	111	0.894291	0.795037	-1.23855	0.785202	NA	NA	-0.185405	0.558667
11	G	2	S	A	E	2	2	2	FALSE	132.5	-0.2112	0.558473	0.869259	0.891249	NA	NA	0.0934301	0.47324
11	G	2	T	A	E	2	2	2	FALSE	200	-0.0369962	0.473944	0.706602	0.693162	NA	NA	0.199892	0.391235
11	G	2	V	A	E	2	2	2	FALSE	150	-0.237711	0.592687	-1.64987	0.76135	NA	NA	-0.770576	0.467682
11	G	3	*	E	E	2	2	2	TRUE	106.5	-2.73199	0.867447	-1.42071	0.845412	NA	NA	-2.05948	0.605437
11	G	3	D	E	E	2	2	2	FALSE	61	0.0389545	0.879848	NA	NA	NA	NA	0.0389545	0.879848
11	G	3	G	E	E	2	2	2	FALSE	274	0.652062	0.45763	0.684496	0.527018	NA	NA	0.666005	0.34554
11	G	3	K	E	E	2	2	2	FALSE	92	NA	NA	1.16427	0.968839	NA	NA	1.16427	0.968839
11	G	3	V	E	E	2	2	2	FALSE	203	-1.52005	0.438248	-0.949126	0.59073	-0.93477	0.941098	-1.27043	0.329665
11	G	4	C	F	E	2	2	2	FALSE	88	NA	NA	-4.23326	1.45766	NA	NA	-4.23326	1.45766
11	G	4	I	F	E	2	2	2	FALSE	178.333	-0.532303	0.480558	-0.318198	0.578232	0.699555	1.04807	-0.318268	0.348548
11	G	4	L	F	E	2	2	2	FALSE	263	-0.185097	0.393066	-0.368349	0.460766	-0.483117	1.05355	-0.278749	0.287675
11	G	4	S	F	E	2	2	2	FALSE	226	-0.0156061	0.408173	0.222787	0.553192	0.337954	0.835813	0.104482	0.305689
11	G	4	Y	F	E	2	2	2	FALSE	215.333	0.264239	0.420997	0.6019	0.55487	0.701769	0.869473	0.428294	0.312914
11	G	5	*	R	E	2	2	2	TRUE	114.5	-2.28552	0.815515	-2.76399	0.875256	NA	NA	-2.50787	0.596659
11	G	5	G	R	E	2	2	2	FALSE	52	-1.78242	1.00527	NA	NA	NA	NA	-1.78242	1.00527
11	G	5	L	R	E	2	2	2	FALSE	125.5	1.19516	0.637615	-0.267819	0.807416	NA	NA	0.633237	0.500398
11	G	5	P	R	E	2	2	2	FALSE	73	-0.042191	0.806261	NA	NA	NA	NA	-0.042191	0.806261
11	G	5	Q	R	E	2	2	2	FALSE	270	-0.0495176	0.396916	1.09016	0.628409	NA	NA	0.275489	0.335582
11	G	6	D	H	E	2	2	2	FALSE	69	0.0991415	0.960405	-0.369875	1.00594	NA	NA	-0.124511	0.69465
11	G	6	L	H	E	2	2	2	FALSE	277.333	-0.303448	0.380124	-0.284095	0.466692	0.258219	0.93946	-0.246094	0.281216
11	G	6	P	H	E	2	2	2	FALSE	70	0.590161	0.818404	NA	NA	NA	NA	0.590161	0.818404
11	G	6	Q	H	E	2	2	2	FALSE	209	0.748165	0.467948	-0.182421	0.508352	1.37744	0.983338	0.436645	0.324947
11	G	6	R	H	E	2	2	2	FALSE	213	-0.137954	0.485154	0.457004	0.634319	NA	NA	0.0816328	0.385361
11	G	6	Y	H	E	2	2	2	FALSE	162	0.0662438	0.561819	-0.468145	0.719724	NA	NA	-0.136091	0.442866
11	G	7	E	D	E	2	2	2	FALSE	146	-0.320702	0.572662	NA	NA	NA	NA	-0.320702	0.572662
11	G	7	G	D	E	2	2	2	FALSE	102	0.276597	0.593446	1.32856	1.12586	NA	NA	0.505326	0.52498
11	G	7	N	D	E	2	2	2	FALSE	102.5	0.604695	0.727496	0.990068	0.863714	NA	NA	0.764631	0.55642
11	G	7	V	D	E	2	2	2	FALSE	115.5	-1.17175	0.648065	-0.251771	0.889819	NA	NA	-0.85289	0.523855
11	G	7	Y	D	E	2	2	2	FALSE	105	-0.249069	0.689742	0.843461	0.891334	NA	NA	0.160124	0.545491
11	G	8	*	S	E	2	2	2	TRUE	74.5	-2.66215	0.813424	-2.83855	1.42076	NA	NA	-2.7057	0.705915
11	G	8	L	S	E	2	2	2	FALSE	95.5	-0.55299	0.710688	0.835785	0.954489	NA	NA	-0.0576679	0.570032
11	G	8	P	S	E	2	2	2	FALSE	122	0.750471	0.67687	0.627958	0.784941	NA	NA	0.698222	0.512604
11	G	8	T	S	E	2	2	2	FALSE	144.333	0.176397	0.471877	1.26118	0.735571	1.04459	1.05637	0.561026	0.371767
11	G	9	*	G	E	2	2	2	TRUE	110	-3.53229	0.674152	-2.771	1.2329	-2.77046	0.994983	-3.20388	0.50844
11	G	9	E	G	E	2	2	2	FALSE	143	-0.16279	0.541701	-0.221922	0.855691	NA	NA	-0.179708	0.457697
11	G	9	R	G	E	2	2	2	FALSE	70	NA	NA	0.242097	1.11472	NA	NA	0.242097	1.11472
11	G	9	V	G	E	2	2	2	FALSE	64	NA	NA	-0.874109	1.18165	NA	NA	-0.874109	1.18165
11	G	10	*	Y	E	2	2	2	TRUE	139.667	-2.01849	0.512515	-3.91287	1.11648	-2.57311	0.947111	-2.39201	0.417972
11	G	10	C	Y	E	2	2	2	FALSE	118.667	0.25331	0.548876	0.827719	0.810422	-0.357295	0.974563	0.292613	0.411875
11	G	10	F	Y	E	2	2	2	FALSE	152.667	2.17191	0.46507	0.363838	0.724824	1.0073	0.937767	1.55006	0.361221
11	G	10	H	Y	E	2	2	2	FALSE	120.667	0.267793	0.611146	0.549572	0.691771	0.539436	1.06673	0.414369	0.420858
11	G	10	N	Y	E	2	2	2	FALSE	192.5	-0.00329674	0.484376	0.74376	0.702754	NA	NA	0.237305	0.398819
11	K	1	E	D	E	2	2	2	FALSE	126	0.113678	0.626435	-0.174115	0.821892	NA	NA	0.0079257	0.498218
11	K	1	G	D	E	2	2	2	FALSE	136	-0.114053	0.494085	1.7042	1.10109	NA	NA	0.190698	0.450782
11	K	1	N	D	E	2	2	2	FALSE	105	0.0669125	0.726786	-0.821523	0.863102	NA	NA	-0.301687	0.555938
11	K	1	V	D	E	2	2	2	FALSE	87	-2.48253	0.908016	-1.72671	0.961473	NA	NA	-2.12622	0.660154
11	K	2	V	A	E	2	2	2	FALSE	69	-2.12982	0.89642	NA	NA	NA	NA	-2.12982	0.89642
11	K	3	G	E	E	2	2	2	FALSE	66.5	-0.54163	0.786512	0.271261	1.25692	NA	NA	-0.312898	0.666737
11	K	3	K	E	E	2	2	2	FALSE	53	NA	NA	-1.10464	1.30489	NA	NA	-1.10464	1.30489
11	K	4	I	F	E	2	2	2	FALSE	106	-0.84836	0.681691	NA	NA	NA	NA	-0.84836	0.681691
11	K	4	L	F	E	2	2	2	FALSE	89	NA	NA	1.10892	0.84524	NA	NA	1.10892	0.84524
11	K	4	S	F	E	2	2	2	FALSE	90.5	0.10648	0.738624	0.102706	0.963421	NA	NA	0.105083	0.586176
11	K	4	Y	F	E	2	2	2	FALSE	92	-0.477992	0.706103	0.211712	1.00048	NA	NA	-0.248672	0.576895
11	K	5	*	R	E	2	2	2	TRUE	68.5	-3.86186	1.37239	-2.80365	1.139	NA	NA	-3.23525	0.876466
11	K	5	L	R	E	2	2	2	FALSE	64	NA	NA	-1.95515	1.22654	NA	NA	-1.95515	1.22654
11	K	5	Q	R	E	2	2	2	FALSE	92	-0.207107	0.792182	-1.35262	0.921528	NA	NA	-0.693891	0.600728
11	K	6	L	H	E	2	2	2	FALSE	80	-1.16338	0.843225	-3.15058	1.15636	NA	NA	-1.85323	0.681319
11	K	6	Q	H	E	2	2	2	FALSE	137.5	-0.639353	0.586682	-0.410965	0.817879	NA	NA	-0.561761	0.476717
11	K	6	R	H	E	2	2	2	FALSE	88.5	0.659725	0.667821	1.05349	1.10269	NA	NA	0.765395	0.571229
11	K	7	E	D	E	2	2	2	FALSE	50	-1.38029	1.00378	NA	NA	NA	NA	-1.38029	1.00378
11	K	7	G	D	E	2	2	2	FALSE	66	NA	NA	-1.36331	1.1782	NA	NA	-1.36331	1.1782
11	K	7	V	D	E	2	2	2	FALSE	52	-2.15711	1.03308	NA	NA	NA	NA	-2.15711	1.03308
11	K	8	P	S	E	2	2	2	FALSE	73	-0.407647	0.892569	-1.62961	1.04248	NA	NA	-0.924527	0.678004
11	K	10	*	Y	E	2	2	2	TRUE	58	-3.97106	1.33905	NA	NA	NA	NA	-3.97106	1.33905
11	K	10	C	Y	E	2	2	2	FALSE	66	-2.59619	0.960302	NA	NA	NA	NA	-2.59619	0.960302
11	K	10	F	Y	E	2	2	2	FALSE	55	NA	NA	-0.852481	1.27389	NA	NA	-0.852481	1.27389
11	K	10	N	Y	E	2	2	2	FALSE	104	-1.99006	0.725015	NA	NA	NA	NA	-1.99006	0.725015
11	V	1	E	D	E	2	2	2	FALSE	321.333	0.300955	0.372376	0.00224911	0.4495	-0.0695087	0.660295	0.139894	0.263025
11	V	1	G	D	E	2	2	2	FALSE	288.667	0.692775	0.344459	1.62163	0.550333	-0.304534	0.681663	0.75909	0.268396
11	V	1	H	D	E	2	2	2	FALSE	57	-1.70237	1.01013	-1.20664	1.2003	NA	NA	-1.49684	0.772867
11	V	1	N	D	E	2	2	2	FALSE	217.333	0.321064	0.420801	0.378228	0.530331	0.465902	0.999663	0.355187	0.313057
11	V	1	V	D	E	2	2	2	FALSE	244.667	-2.37913	0.498393	-2.86048	0.551343	-2.47027	0.773943	-2.5723	0.333611
11	V	1	Y	D	E	2	2	2	FALSE	95	-0.572509	0.874058	-2.06127	0.877045	NA	NA	-1.31435	0.619105
11	V	2	E	A	E	2	2	2	FALSE	174	-0.825304	0.564993	0.239319	0.674877	NA	NA	-0.38661	0.433219
11	V	2	G	A	E	2	2	2	FALSE	57	-1.55577	0.948631	NA	NA	NA	NA	-1.55577	0.948631
11	V	2	P	A	E	2	2	2	FALSE	51	NA	NA	-0.695987	1.31903	NA	NA	-0.695987	1.31903
11	V	2	S	A	E	2	2	2	FALSE	73	0.170354	0.755348	-1.18755	1.05841	-0.793523	1.04768	-0.4174	0.530267
11	V	2	T	A	E	2	2	2	FALSE	125.333	1.91641	0.602289	0.873673	0.683408	0.763433	0.998939	1.34216	0.411695
11	V	2	V	A	E	2	2	2	FALSE	148	-1.14536	0.555112	-2.73761	0.740615	-1.59233	0.89683	-1.69333	0.398043
11	V	3	*	E	E	2	2	2	TRUE	116	NA	NA	-3.81383	1.14702	NA	NA	-3.81383	1.14702
11	V	3	D	E	E	2	2	2	FALSE	77	0.589767	0.781015	NA	NA	NA	NA	0.589767	0.781015
11	V	3	G	E	E	2	2	2	FALSE	160.5	0.430189	0.516662	1.09189	0.786371	NA	NA	0.629705	0.431801
11	V	3	K	E	E	2	2	2	FALSE	113	1.09215	0.866498	-1.26836	0.746798	NA	NA	-0.262289	0.565691
11	V	3	V	E	E	2	2	2	FALSE	172.333	-0.533558	0.476409	-0.394652	0.684206	-1.57181	0.787402	-0.702518	0.350178
11	V	4	C	F	E	2	2	2	FALSE	93	-2.04532	0.768949	NA	NA	NA	NA	-2.04532	0.768949
11	V	4	I	F	E	2	2	2	FALSE	216.5	-0.438682	0.503655	-1.73186	0.631294	NA	NA	-0.941652	0.393708
11	V	4	L	F	E	2	2	2	FALSE	347	-0.424112	0.3887	-0.659127	0.425785	-0.843094	0.549586	-0.597852	0.254449
11	V	4	S	F	E	2	2	2	FALSE	350.667	0.101044	0.333085	-0.426094	0.44951	0.203687	0.695424	-0.0484601	0.249764
11	V	4	Y	F	E	2	2	2	FALSE	256	0.0124728	0.35336	0.343729	0.602612	0.173028	0.753722	0.107884	0.282586
11	V	5	*	R	E	2	2	2	TRUE	92.3333	-2.15913	0.7886	-3.05938	0.926243	-1.94735	1.12015	-2.40574	0.529213
11	V	5	L	R	E	2	2	2	FALSE	211	-1.45619	0.407063	-0.679588	0.637198	-1.34162	0.860148	-1.24627	0.318634
11	V	5	P	R	E	2	2	2	FALSE	84	NA	NA	-2.30329	1.09491	NA	NA	-2.30329	1.09491
11	V	5	Q	R	E	2	2	2	FALSE	120	-0.0905861	0.748755	-1.4159	0.645575	-0.405984	1.06199	-0.772992	0.444125
11	V	6	D	H	E	2	2	2	FALSE	59	NA	NA	-0.515185	1.22314	NA	NA	-0.515185	1.22314
11	V	6	L	H	E	2	2	2	FALSE	257	-1.82708	0.363323	-0.130142	0.572825	-0.309485	0.954445	-1.24372	0.292092
11	V	6	N	H	E	2	2	2	FALSE	64	0.361954	0.792462	-1.76541	1.33483	NA	NA	-0.192444	0.681424
11	V	6	P	H	E	2	2	2	FALSE	66	-1.00923	0.863619	NA	NA	NA	NA	-1.00923	0.863619
11	V	6	Q	H	E	2	2	2	FALSE	240.667	0.517198	0.455261	-0.121741	0.490751	0.453515	0.745072	0.260413	0.304596
11	V	6	R	H	E	2	2	2	FALSE	332.667	0.235478	0.340596	0.426003	0.459104	0.406632	0.705253	0.31665	0.255029
11	V	6	Y	H	E	2	2	2	FALSE	133.5	0.300891	0.627846	-1.0568	0.786831	NA	NA	-0.227276	0.490758
11	V	7	E	D	E	2	2	2	FALSE	97	-0.449117	0.610169	NA	NA	NA	NA	-0.449117	0.610169
11	V	7	G	D	E	2	2	2	FALSE	156	0.0798463	0.553121	0.677007	0.751127	NA	NA	0.28981	0.44539
11	V	7	N	D	E	2	2	2	FALSE	88	0.143453	0.726211	0.567974	1.00415	NA	NA	0.289239	0.588449
11	V	7	V	D	E	2	2	2	FALSE	139	-1.61116	0.545844	-2.67325	0.800368	-1.9886	0.956245	-1.95565	0.407875
11	V	7	Y	D	E	2	2	2	FALSE	74	-0.169476	0.912077	-2.05642	1.03508	NA	NA	-0.994222	0.684313
11	V	8	P	S	E	2	2	2	FALSE	129.333	0.938985	0.71076	-0.5896	0.609466	0.733799	1.03925	0.169866	0.42267
11	V	8	T	S	E	2	2	2	FALSE	215.5	0.558861	0.454232	-0.768766	0.679221	NA	NA	0.14859	0.37758
11	V	9	*	G	E	2	2	2	TRUE	147.333	-3.20645	0.628414	-3.89169	0.917474	-3.73579	1.15351	-3.47746	0.472889
11	V	9	E	G	E	2	2	2	FALSE	131	-0.456532	0.580716	0.236263	0.863145	NA	NA	-0.240656	0.481819
11	V	9	R	G	E	2	2	2	FALSE	56	-0.259666	0.921251	NA	NA	NA	NA	-0.259666	0.921251
11	V	9	V	G	E	2	2	2	FALSE	77	NA	NA	-0.944386	1.07916	NA	NA	-0.944386	1.07916
11	V	10	*	Y	E	2	2	2	TRUE	101	-3.33998	0.847201	-3.44717	0.968865	-0.223657	1.05172	-2.53609	0.545332
11	V	10	C	Y	E	2	2	2	FALSE	162.333	-0.535624	0.561429	-1.2177	0.609926	0.160731	0.85729	-0.658318	0.372128
11	V	10	F	Y	E	2	2	2	FALSE	173.5	-0.0144815	0.469782	0.759716	0.836232	NA	NA	0.171242	0.409576
11	V	10	H	Y	E	2	2	2	FALSE	127.667	0.242062	0.699479	-1.54959	0.647172	-0.281998	0.981024	-0.639438	0.427549
11	V	10	N	Y	E	2	2	2	FALSE	129.5	0.968453	0.672972	-1.7161	0.780427	NA	NA	-0.176426	0.509654
12	A	1	E	D	V	2	2	2	FALSE	202	-0.575324	0.489644	-0.226541	0.670675	NA	NA	-0.454056	0.395465
12	A	1	G	D	V	2	2	2	FALSE	172.333	0.683416	0.48725	0.596839	0.595711	0.982416	0.950199	0.694131	0.350552
12	A	1	N	D	V	2	2	2	FALSE	119.5	-0.208327	0.540474	0.78937	1.09604	NA	NA	-0.0131764	0.484742
12	A	1	V	D	V	2	2	2	FALSE	219.333	-1.68711	0.412205	-1.04032	0.583089	-1.3448	0.972096	-1.45801	0.318065
12	A	1	Y	D	V	2	2	2	FALSE	74	NA	NA	-0.496478	1.09223	NA	NA	-0.496478	1.09223
12	A	2	E	A	V	2	2	2	FALSE	78	0.460512	0.771946	-1.48042	1.09532	NA	NA	-0.183609	0.630987
12	A	2	G	A	V	2	2	2	FALSE	51	NA	NA	-2.57915	1.43664	NA	NA	-2.57915	1.43664
12	A	2	P	A	V	2	2	2	FALSE	54	NA	NA	-1.01745	1.2901	NA	NA	-1.01745	1.2901
12	A	2	S	A	V	2	2	2	FALSE	86.5	0.377067	0.702223	0.309714	1.06254	NA	NA	0.356592	0.585841
12	A	2	T	A	V	2	2	2	FALSE	170.5	-0.576512	0.523208	0.0662228	0.739719	NA	NA	-0.362187	0.427157
12	A	2	V	A	V	2	2	2	FALSE	95.5	-1.89289	0.741321	-1.67036	1.0043	NA	NA	-1.81441	0.596434
12	A	3	*	E	V	2	2	2	TRUE	61	-4.02149	1.32458	NA	NA	NA	NA	-4.02149	1.32458
12	A	3	D	E	V	2	2	2	FALSE	60	-1.23237	0.911975	NA	NA	NA	NA	-1.23237	0.911975
12	A	3	G	E	V	2	2	2	FALSE	87	0.444207	0.762642	-0.0968951	0.970219	NA	NA	0.237557	0.599581
12	A	3	K	E	V	2	2	2	FALSE	54	0.853991	0.928496	NA	NA	NA	NA	0.853991	0.928496
12	A	3	V	E	V	2	2	2	FALSE	144.333	-1.19478	0.525015	-0.118205	0.736359	-1.44366	0.870557	-0.950792	0.383718
12	A	4	I	F	V	2	2	2	FALSE	143.667	-0.18908	0.580244	-0.723501	0.651002	-0.567827	0.904095	-0.452217	0.390639
12	A	4	L	F	V	2	2	2	FALSE	213	-0.38747	0.432585	-0.13954	0.533392	NA	NA	-0.2891	0.33598
12	A	4	S	F	V	2	2	2	FALSE	229.333	-0.381301	0.415329	0.207158	0.52112	0.182923	0.927837	-0.116074	0.306554
12	A	4	Y	F	V	2	2	2	FALSE	115.667	-0.381926	0.565167	0.271261	0.831716	-0.516517	0.949512	-0.242103	0.419387
12	A	5	*	R	V	2	2	2	TRUE	138	-2.6832	0.882901	-3.77853	0.876627	NA	NA	-3.23477	0.622075
12	A	5	L	R	V	2	2	2	FALSE	146	-0.725534	0.56192	-0.811908	0.813852	NA	NA	-0.753417	0.462409
12	A	5	Q	R	V	2	2	2	FALSE	172	-0.985557	0.549153	0.254062	0.702594	NA	NA	-0.515453	0.432671
12	A	6	L	H	V	2	2	2	FALSE	160	-0.432804	0.527441	-1.35147	0.801403	NA	NA	-0.710462	0.440582
12	A	6	N	H	V	2	2	2	FALSE	59	NA	NA	-0.283262	1.21955	NA	NA	-0.283262	1.21955
12	A	6	Q	H	V	2	2	2	FALSE	202.5	-0.911692	0.471341	-1.22268	0.710197	NA	NA	-1.00679	0.392721
12	A	6	R	H	V	2	2	2	FALSE	123.667	0.938287	0.726189	-0.66236	0.719708	-0.830582	0.772677	-0.161889	0.426331
12	A	6	Y	H	V	2	2	2	FALSE	117	0.103053	0.661735	-0.650592	0.843234	NA	NA	-0.184183	0.520576
12	A	7	A	D	V	2	2	2	FALSE	58	0.255178	0.877945	0.766727	1.25368	NA	NA	0.4235	0.719142
12	A	7	G	D	V	2	2	2	FALSE	116.5	0.526939	0.716174	-0.317956	0.790603	NA	NA	0.146124	0.530779
12	A	7	N	D	V	2	2	2	FALSE	58	1.33674	0.935302	1.48254	1.16916	NA	NA	1.39364	0.730357
12	A	7	V	D	V	2	2	2	FALSE	185.5	-0.961974	0.52117	-0.529078	0.692747	NA	NA	-0.805514	0.416471
12	A	7	Y	D	V	2	2	2	FALSE	61	-0.540248	0.887484	0.365649	1.19295	NA	NA	-0.217505	0.712053
12	A	8	L	S	V	2	2	2	FALSE	87	-0.52107	0.90947	-1.37877	0.890068	NA	NA	-0.959167	0.636122
12	A	8	P	S	V	2	2	2	FALSE	132.667	0.121789	0.538378	-0.185675	0.734603	-0.0840886	0.94695	-0.00275266	0.39472
12	A	8	T	S	V	2	2	2	FALSE	172	0.350019	0.521123	-0.629481	0.631029	-0.307909	0.758138	-0.104325	0.355034
12	A	9	*	G	V	2	2	2	TRUE	216	-4.74053	0.745768	-3.84046	0.760448	-3.97795	1.18629	-4.24539	0.485765
12	A	9	A	G	V	2	2	2	FALSE	57.5	-2.24892	0.995284	-1.23331	1.25176	NA	NA	-1.85554	0.779042
12	A	9	E	G	V	2	2	2	FALSE	61.5	-1.00923	0.863619	-1.29634	1.26496	NA	NA	-1.10051	0.713246
12	A	9	R	G	V	2	2	2	FALSE	83	-1.35904	0.781425	NA	NA	NA	NA	-1.35904	0.781425
12	A	9	V	G	V	2	2	2	FALSE	70	-1.56517	0.870046	-1.87831	1.15193	NA	NA	-1.67892	0.694268
12	A	10	*	Y	V	2	2	2	TRUE	182	-3.79561	0.809775	-5.84328	1.64138	NA	NA	-4.19644	0.726207
12	A	10	C	Y	V	2	2	2	FALSE	137.333	-0.34535	0.559582	-0.247088	0.681245	0.404933	0.957857	-0.185448	0.39411
12	A	10	F	Y	V	2	2	2	FALSE	140.667	-0.836693	0.468591	0.352927	0.800318	-0.640321	1.04612	-0.54694	0.377178
12	A	10	H	Y	V	2	2	2	FALSE	185.5	-1.00211	0.492441	-0.116559	0.738615	NA	NA	-0.729609	0.409728
12	A	10	N	Y	V	2	2	2	FALSE	137	-0.633032	0.68459	-1.9334	0.753264	NA	NA	-1.22125	0.506621
12	A	11	A	E	V	2	2	2	FALSE	71	-0.236037	0.869026	-0.188941	1.05332	NA	NA	-0.216963	0.670332
12	A	11	D	E	V	2	2	2	FALSE	246	NA	NA	-1.54924	0.51441	NA	NA	-1.54924	0.51441
12	A	11	G	E	V	2	2	2	FALSE	206.667	-0.553751	0.383177	0.432108	0.662218	0.380281	0.933086	-0.229438	0.312504
12	A	11	K	E	V	2	2	2	FALSE	92	-1.52575	0.76509	-0.326402	0.957314	NA	NA	-1.05828	0.597666
12	A	11	V	E	V	2	2	2	FALSE	175	-0.125025	0.649171	-0.940021	0.563339	-0.0880948	0.726597	-0.46179	0.367157
12	D	1	E	D	V	2	2	2	FALSE	220.667	-0.306619	0.436319	-0.297348	0.550108	-0.256648	0.781398	-0.295586	0.313188
12	D	1	G	D	V	2	2	2	FALSE	215.667	0.628699	0.432378	-0.109901	0.537401	0.739302	0.888666	0.388824	0.315004
12	D	1	N	D	V	2	2	2	FALSE	182.667	0.325147	0.44205	0.0467624	0.611456	0.542332	0.992019	0.26567	0.336941
12	D	1	V	D	V	2	2	2	FALSE	273.667	-1.09247	0.409301	-0.37449	0.510172	-1.75039	0.663438	-0.987881	0.28768
12	D	1	Y	D	V	2	2	2	FALSE	81	0.543811	0.712322	1.20759	1.11802	NA	NA	0.735462	0.600751
12	D	2	E	A	V	2	2	2	FALSE	110.5	-2.41056	0.664659	-0.12803	1.00329	NA	NA	-1.71435	0.554097
12	D	2	S	A	V	2	2	2	FALSE	99	-0.703291	0.716593	0.00436902	0.921283	NA	NA	-0.43654	0.565633
12	D	2	T	A	V	2	2	2	FALSE	166.5	-1.00923	0.596214	-0.826191	0.683444	NA	NA	-0.930128	0.449282
12	D	2	V	A	V	2	2	2	FALSE	190.333	-1.19155	0.462319	-1.68425	0.64494	-1.60845	0.810809	-1.40293	0.34092
12	D	3	*	E	V	2	2	2	TRUE	72	-4.20107	1.27752	-4.98621	1.79485	-3.48511	1.25673	-4.06639	0.80159
12	D	3	G	E	V	2	2	2	FALSE	113.5	-0.0441461	0.604035	0.730792	0.954887	NA	NA	0.177323	0.510476
12	D	3	K	E	V	2	2	2	FALSE	64.5	0.86709	0.954984	-0.594163	1.06546	NA	NA	0.216123	0.711136
12	D	3	V	E	V	2	2	2	FALSE	132	-0.386349	0.589927	-0.309656	0.735594	-0.466737	0.827288	-0.382422	0.402172
12	D	4	I	F	V	2	2	2	FALSE	159.333	-0.653359	0.517245	-0.726818	0.654119	-1.40773	0.87907	-0.809133	0.368381
12	D	4	L	F	V	2	2	2	FALSE	337.333	-1.46413	0.379531	-0.690657	0.453144	0.0579233	0.562879	-0.891547	0.25847
12	D	4	S	F	V	2	2	2	FALSE	174	-0.292326	0.487292	-0.257123	0.586659	0.272602	1.0238	-0.212874	0.351996
12	D	4	Y	F	V	2	2	2	FALSE	173.5	-1.01223	0.549583	-0.132483	0.698939	NA	NA	-0.67611	0.432022
12	D	5	*	R	V	2	2	2	TRUE	119	-2.81104	0.80484	-3.76405	1.04077	NA	NA	-3.16768	0.636677
12	D	5	G	R	V	2	2	2	FALSE	86	NA	NA	0.462458	1.0047	NA	NA	0.462458	1.0047
12	D	5	L	R	V	2	2	2	FALSE	138	-2.5366	0.633728	-0.175962	0.841448	NA	NA	-1.68222	0.506218
12	D	5	Q	R	V	2	2	2	FALSE	144.5	-0.414861	0.691551	-1.10227	0.694764	NA	NA	-0.756971	0.490133
12	D	6	L	H	V	2	2	2	FALSE	187.667	-0.599638	0.456008	-3.84421	0.759668	-1.51216	1.08702	-1.46515	0.367903
12	D	6	N	H	V	2	2	2	FALSE	69	0.198585	0.950301	0.179458	1.00648	NA	NA	0.18957	0.690973
12	D	6	Q	H	V	2	2	2	FALSE	203.333	-0.632992	0.455427	0.0167282	0.587387	-0.300083	0.763727	-0.372884	0.325574
12	D	6	R	H	V	3	2	2	FALSE	170.667	-0.173277	0.461476	NA	NA	NA	NA	-0.173277	0.461476
12	D	6	Y	H	V	2	2	2	FALSE	105.5	-0.903866	0.60706	-1.5447	1.10506	NA	NA	-1.05243	0.532063
12	D	7	E	D	V	2	2	2	FALSE	127	NA	NA	-0.762488	0.837089	NA	NA	-0.762488	0.837089
12	D	7	G	D	V	2	2	2	FALSE	77	0.459604	0.781714	-0.299034	0.919624	0.563202	1.08603	0.238916	0.522227
12	D	7	N	D	V	2	2	2	FALSE	89	-1.03196	0.746294	NA	NA	NA	NA	-1.03196	0.746294
12	D	7	V	D	V	2	2	2	FALSE	81.5	-0.404911	0.694796	-0.364163	1.18143	NA	NA	-0.394439	0.598904
12	D	7	Y	D	V	2	2	2	FALSE	54.5	0.175563	0.969089	-0.817112	1.22921	NA	NA	-0.204933	0.761026
12	D	8	*	S	V	2	2	2	TRUE	54	-3.49413	1.2323	NA	NA	NA	NA	-3.49413	1.2323
12	D	8	L	S	V	2	2	2	FALSE	86	-2.07967	0.726554	-0.163293	1.14317	NA	NA	-1.52829	0.613188
12	D	8	P	S	V	2	2	2	FALSE	101.667	-0.0590347	0.739996	0.0207816	0.759086	-0.667237	0.963509	-0.170405	0.464297
12	D	8	T	S	V	2	2	2	FALSE	136.667	-0.351348	0.494562	0.433168	0.830901	-0.132385	0.871949	-0.143483	0.38202
12	D	9	*	G	V	2	2	2	TRUE	168.333	-4.89422	0.940484	-4.75174	1.07556	-3.4143	1.10211	-4.4182	0.595672
12	D	9	E	G	V	2	2	2	FALSE	123	-1.67828	0.654916	NA	NA	NA	NA	-1.67828	0.654916
12	D	9	R	G	V	2	2	2	FALSE	72	-1.44644	0.841115	NA	NA	NA	NA	-1.44644	0.841115
12	D	10	*	Y	V	2	2	2	TRUE	122.667	-4.17329	0.911465	-3.98855	1.09458	-4.90073	1.31244	-4.27567	0.617931
12	D	10	C	Y	V	2	2	2	FALSE	67.6667	-0.313275	0.734385	-0.239566	1.27401	-1.09769	1.0108	-0.522705	0.538457
12	D	10	F	Y	V	2	2	2	FALSE	121.5	0.299327	0.625354	-0.829872	0.859683	NA	NA	-0.0914213	0.50571
12	D	10	H	Y	V	2	2	2	FALSE	98.5	-0.331255	0.760112	-1.91317	0.917864	NA	NA	-0.974794	0.585429
12	D	10	N	Y	V	2	2	2	FALSE	68	0.0595324	0.833881	NA	NA	NA	NA	0.0595324	0.833881
12	D	11	A	E	V	2	2	2	FALSE	51	0.0391235	0.961029	NA	NA	NA	NA	0.0391235	0.961029
12	D	11	D	E	V	2	2	2	FALSE	218	-0.908103	0.390286	-0.493711	0.666146	0.111987	0.765107	-0.653853	0.308214
12	D	11	G	E	V	2	2	2	FALSE	131	-0.62947	0.50301	-0.332637	0.882758	-0.380112	0.868592	-0.521037	0.390405
12	D	11	K	E	V	2	2	2	FALSE	119	-1.91595	0.830405	-2.14434	0.785888	NA	NA	-2.03643	0.570796
12	D	11	V	E	V	2	2	2	FALSE	213	-0.825721	0.489007	-0.583614	0.568714	-1.7858	0.687539	-0.962311	0.326353
12	F	1	E	D	V	2	2	2	FALSE	68.5	-1.27749	0.989821	-0.692394	1.01646	NA	NA	-0.99271	0.70914
12	F	1	G	D	V	2	2	2	FALSE	90	0.555214	0.791338	-0.893219	0.923699	NA	NA	-0.0578796	0.600958
12	F	1	N	D	V	2	2	2	FALSE	71	NA	NA	-0.701452	1.1185	NA	NA	-0.701452	1.1185
12	F	1	V	D	V	2	2	2	FALSE	87.5	-0.918843	0.814251	-1.9147	0.974975	NA	NA	-1.32803	0.624966
12	F	2	E	A	V	2	2	2	FALSE	82	NA	NA	-3.46485	1.27334	NA	NA	-3.46485	1.27334
12	F	3	V	E	V	2	2	2	FALSE	53	NA	NA	-2.80128	1.44126	NA	NA	-2.80128	1.44126
12	F	4	I	F	V	2	2	2	FALSE	51	-1.13439	0.984639	NA	NA	NA	NA	-1.13439	0.984639
12	F	4	L	F	V	2	2	2	FALSE	67	NA	NA	-1.93182	1.19734	NA	NA	-1.93182	1.19734
12	F	4	S	F	V	2	2	2	FALSE	99	-0.251219	0.703492	-1.75339	0.967354	NA	NA	-0.770851	0.56895
12	F	4	Y	F	V	2	2	2	FALSE	100	-1.25769	0.710462	NA	NA	NA	NA	-1.25769	0.710462
12	F	6	L	H	V	2	2	2	FALSE	89.5	-3.01968	1.10566	-3.64828	1.07647	NA	NA	-3.34239	0.771292
12	F	6	Q	H	V	2	2	2	FALSE	86	0.377067	0.74957	-0.509485	1.00207	NA	NA	0.0589856	0.600225
12	F	6	R	H	V	2	2	2	FALSE	99	1.01129	0.810921	-0.434048	0.833982	NA	NA	0.308882	0.58139
12	F	6	Y	H	V	2	2	2	FALSE	116	-1.36837	0.663818	NA	NA	NA	NA	-1.36837	0.663818
12	F	9	*	G	V	2	2	2	TRUE	55	NA	NA	-3.06304	1.46063	NA	NA	-3.06304	1.46063
12	F	10	F	Y	V	2	2	2	FALSE	83	-1.07136	0.773198	NA	NA	NA	NA	-1.07136	0.773198
12	F	11	D	E	V	2	2	2	FALSE	76	-0.240856	0.862379	1.06658	0.990803	NA	NA	0.322691	0.650492
12	F	11	K	E	V	2	2	2	FALSE	52	-1.99006	1.01948	NA	NA	NA	NA	-1.99006	1.01948
12	F	11	V	E	V	2	2	2	FALSE	156	NA	NA	-1.12345	0.762593	NA	NA	-1.12345	0.762593
12	G	1	G	D	V	2	2	2	FALSE	81.5	0.0554838	0.79475	1.0051	0.990992	NA	NA	0.427181	0.619998
12	G	1	V	D	V	2	2	2	FALSE	93.5	-2.12821	0.672553	-0.834021	1.19004	NA	NA	-1.81491	0.585515
12	G	1	Y	D	V	2	2	2	FALSE	56	NA	NA	0.413432	1.24459	NA	NA	0.413432	1.24459
12	G	2	S	A	V	2	2	2	FALSE	67	-0.649571	0.849348	NA	NA	NA	NA	-0.649571	0.849348
12	G	2	V	A	V	2	2	2	FALSE	69.5	-1.97524	0.898654	-0.968363	1.11646	NA	NA	-1.57937	0.700049
12	G	4	I	F	V	2	2	2	FALSE	60	-0.673966	0.904689	0.773575	1.19055	NA	NA	-0.144082	0.720318
12	G	4	Y	F	V	2	2	2	FALSE	60	0.722429	0.882143	NA	NA	NA	NA	0.722429	0.882143
12	G	5	L	R	V	2	2	2	FALSE	76	-0.74484	0.800078	NA	NA	NA	NA	-0.74484	0.800078
12	G	6	L	H	V	2	2	2	FALSE	75	NA	NA	-1.80748	1.12481	NA	NA	-1.80748	1.12481
12	G	8	T	S	V	2	2	2	FALSE	61	NA	NA	-2.75929	1.33753	NA	NA	-2.75929	1.33753
12	G	11	D	E	V	2	2	2	FALSE	61	-0.915541	0.933869	-0.685489	1.15966	NA	NA	-0.825042	0.727347
12	G	11	G	E	V	2	2	2	FALSE	95	-0.404049	0.712394	NA	NA	NA	NA	-0.404049	0.712394
12	G	11	V	E	V	2	2	2	FALSE	64	-0.0177128	0.859861	NA	NA	NA	NA	-0.0177128	0.859861
12	I	1	E	D	V	2	2	2	FALSE	134.5	-0.249217	0.714342	-0.875091	0.716293	NA	NA	-0.5613	0.505804
12	I	1	G	D	V	2	2	2	FALSE	131	0.945642	0.610828	0.221615	0.803939	NA	NA	0.680648	0.486367
12	I	1	N	D	V	2	2	2	FALSE	137	0.177723	0.554271	0.0826596	0.864116	NA	NA	0.150012	0.466543
12	I	1	V	D	V	2	2	2	FALSE	147.5	-0.869465	0.576417	-1.58116	0.80227	NA	NA	-1.11177	0.468119
12	I	1	Y	D	V	2	2	2	FALSE	68	-1.30998	0.809095	0.870166	1.21007	NA	NA	-0.636422	0.672595
12	I	2	E	A	V	2	2	2	FALSE	63.5	0.54137	0.913666	-1.02885	1.1258	NA	NA	-0.082164	0.709431
12	I	2	S	A	V	2	2	2	FALSE	111.5	-0.535359	0.656198	1.41395	0.885849	NA	NA	0.155291	0.527289
12	I	2	T	A	V	2	2	2	FALSE	76	NA	NA	-0.0541028	1.07244	NA	NA	-0.0541028	1.07244
12	I	2	V	A	V	2	2	2	FALSE	79	-1.04098	0.719377	-1.85379	1.23958	NA	NA	-1.24576	0.622192
12	I	3	*	E	V	2	2	2	TRUE	50	-3.41717	1.25932	NA	NA	NA	NA	-3.41717	1.25932
12	I	3	A	E	V	2	2	2	FALSE	51	-1.27749	0.989821	NA	NA	NA	NA	-1.27749	0.989821
12	I	3	G	E	V	2	2	2	FALSE	67.5	-0.280535	0.79303	-1.28997	1.24316	NA	NA	-0.5725	0.668579
12	I	3	K	E	V	2	2	2	FALSE	63	NA	NA	-1.63207	1.21755	NA	NA	-1.63207	1.21755
12	I	3	V	E	V	2	2	2	FALSE	55	-1.39222	0.958128	NA	NA	NA	NA	-1.39222	0.958128
12	I	4	I	F	V	2	2	2	FALSE	101.5	-0.464	0.775683	-0.871518	0.853392	NA	NA	-0.648364	0.574002
12	I	4	L	F	V	2	2	2	FALSE	203	-1.6049	0.51529	-1.8843	0.70344	NA	NA	-1.70247	0.415692
12	I	4	S	F	V	2	2	2	FALSE	106.5	0.331479	0.643368	-1.68646	0.979111	NA	NA	-0.277062	0.537678
12	I	4	Y	F	V	2	2	2	FALSE	83.5	0.247609	0.820557	0.239654	0.947528	NA	NA	0.2442	0.620291
12	I	5	*	R	V	2	2	2	TRUE	68	-3.31181	1.12612	-3.67784	1.37668	NA	NA	-3.45854	0.871645
12	I	5	L	R	V	2	2	2	FALSE	86	-1.02792	0.781428	-1.22822	0.999887	NA	NA	-1.10387	0.615705
12	I	5	Q	R	V	2	2	2	FALSE	109.5	-2.30851	0.762772	-1.75587	0.887912	NA	NA	-2.07385	0.57859
12	I	6	L	H	V	2	2	2	FALSE	115	-1.60393	0.772426	-1.28324	0.799752	NA	NA	-1.44916	0.555597
12	I	6	Q	H	V	2	2	2	FALSE	240	-0.853906	0.456831	-0.0646997	0.610756	NA	NA	-0.570774	0.36582
12	I	6	R	H	V	2	2	2	FALSE	84	0.952566	0.895947	-0.482524	0.896365	NA	NA	0.235355	0.633678
12	I	6	Y	H	V	2	2	2	FALSE	69	0.347526	0.803135	-1.27339	1.18396	NA	NA	-0.163288	0.664645
12	I	7	E	D	V	2	2	2	FALSE	53	NA	NA	-0.11786	1.28435	NA	NA	-0.11786	1.28435
12	I	7	H	D	V	2	2	2	FALSE	51	-1.89653	1.02251	NA	NA	NA	NA	-1.89653	1.02251
12	I	7	V	D	V	2	2	2	FALSE	64	-0.792353	0.871582	NA	NA	NA	NA	-0.792353	0.871582
12	I	8	*	S	V	2	2	2	TRUE	50	NA	NA	-3.66451	1.69218	NA	NA	-3.66451	1.69218
12	I	8	L	S	V	2	2	2	FALSE	52	-0.891444	0.968003	NA	NA	NA	NA	-0.891444	0.968003
12	I	8	P	S	V	2	2	2	FALSE	74	0.703196	0.889572	0.170272	0.989505	NA	NA	0.464996	0.66154
12	I	8	T	S	V	2	2	2	FALSE	74	NA	NA	-2.54572	1.18953	NA	NA	-2.54572	1.18953
12	I	9	*	G	V	2	2	2	TRUE	85	NA	NA	-4.89571	1.81881	NA	NA	-4.89571	1.81881
12	I	9	E	G	V	2	2	2	FALSE	66.5	-1.62541	0.831723	-0.327057	1.23062	NA	NA	-1.2183	0.689098
12	I	10	*	Y	V	2	2	2	TRUE	97	-3.79218	0.989563	NA	NA	NA	NA	-3.79218	0.989563
12	I	10	C	Y	V	2	2	2	FALSE	89.5	0.0434002	0.730952	0.372218	0.982709	NA	NA	0.160522	0.586499
12	I	10	F	Y	V	2	2	2	FALSE	74.5	-0.42144	0.712606	-1.24195	1.2975	NA	NA	-0.611582	0.624604
12	I	10	H	Y	V	2	2	2	FALSE	57	NA	NA	-0.663918	1.24718	NA	NA	-0.663918	1.24718
12	I	10	N	Y	V	2	2	2	FALSE	81	NA	NA	-0.931774	1.05198	NA	NA	-0.931774	1.05198
12	I	11	D	E	V	2	2	2	FALSE	184.667	0.190438	0.470804	0.380437	0.588172	0.348095	0.879724	0.277039	0.339144
12	I	11	G	E	V	2	2	2	FALSE	111.5	0.978384	0.672943	-0.026658	0.857641	NA	NA	0.595402	0.529423
12	I	11	K	E	V	2	2	2	FALSE	60	NA	NA	0.192826	1.20418	NA	NA	0.192826	1.20418
12	I	11	V	E	V	2	2	2	FALSE	89	-0.71568	0.756859	-0.00740769	0.969438	NA	NA	-0.447459	0.596577
12	L	1	G	D	V	2	2	2	FALSE	88	-0.594793	0.662697	1.70207	1.15064	NA	NA	-0.0226799	0.574263
12	L	1	N	D	V	2	2	2	FALSE	60	-0.192027	0.945686	-0.382026	1.14597	NA	NA	-0.268999	0.729395
12	L	1	V	D	V	2	2	2	FALSE	79.5	-2.02687	0.811927	-3.38841	1.30527	NA	NA	-2.40672	0.689429
12	L	3	V	E	V	2	2	2	FALSE	72	-0.948602	0.825976	NA	NA	NA	NA	-0.948602	0.825976
12	L	5	Q	R	V	2	2	2	FALSE	57	NA	NA	-2.40162	1.33852	NA	NA	-2.40162	1.33852
12	L	6	L	H	V	2	2	2	FALSE	98	NA	NA	-5.03889	1.78173	NA	NA	-5.03889	1.78173
12	L	6	Q	H	V	2	2	2	FALSE	77	-2.54967	0.88516	NA	NA	NA	NA	-2.54967	0.88516
12	L	7	V	D	V	2	2	2	FALSE	60.5	-4.77815	1.64507	-4.47588	1.95683	NA	NA	-4.65298	1.25921
12	L	10	N	Y	V	2	2	2	FALSE	69	-1.57977	0.864462	NA	NA	NA	NA	-1.57977	0.864462
12	L	11	G	E	V	2	2	2	FALSE	64	NA	NA	-3.91287	1.57774	NA	NA	-3.91287	1.57774
12	L	11	V	E	V	2	2	2	FALSE	56	NA	NA	-3.77853	1.63712	NA	NA	-3.77853	1.63712
13	L	1	E	D	H	2	2	2	FALSE	242.333	-1.02314	0.381925	-0.845298	0.535999	-0.0385506	1.07854	-0.892248	0.298861
13	L	1	G	D	H	2	2	2	FALSE	159.667	0.0304806	0.457155	-0.0890857	0.678396	-0.067323	1.06913	-0.0136127	0.357311
13	L	1	N	D	H	2	2	2	FALSE	181.5	-0.406886	0.479503	-0.0250353	0.772107	NA	NA	-0.300605	0.407342
13	L	1	V	D	H	2	2	2	FALSE	361	-2.69231	0.444863	-2.47534	0.517309	NA	NA	-2.60007	0.337296
13	L	1	Y	D	H	2	2	2	FALSE	79.5	-2.42537	0.928236	-2.64777	1.08329	NA	NA	-2.51953	0.704866
13	L	2	E	A	H	2	2	2	FALSE	86	-2.85983	0.791282	-1.23447	1.16491	NA	NA	-2.34666	0.654556
13	L	2	S	A	H	2	2	2	FALSE	121	-2.06238	0.656302	-0.982452	0.892235	NA	NA	-1.68322	0.528681
13	L	2	T	A	H	2	2	2	FALSE	138	-1.39222	0.717855	-1.09542	0.715743	NA	NA	-1.24338	0.506852
13	L	2	V	A	H	2	2	2	FALSE	187.5	-2.73114	0.525911	-2.48982	0.861635	NA	NA	-2.66564	0.448899
13	L	3	*	E	H	2	2	2	TRUE	109	NA	NA	-3.45251	1.27838	NA	NA	-3.45251	1.27838
13	L	3	D	E	H	2	2	2	FALSE	82.5	-2.01475	0.816028	-0.583203	1.03281	NA	NA	-1.46455	0.640289
13	L	3	G	E	H	2	2	2	FALSE	121	-0.68283	0.538823	0.469924	1.10534	NA	NA	-0.461498	0.48434
13	L	3	K	E	H	2	2	2	FALSE	97	NA	NA	-2.12066	1.0066	NA	NA	-2.12066	1.0066
13	L	3	V	E	H	2	2	2	FALSE	96	-2.30149	0.897485	-1.93515	0.892073	NA	NA	-2.11722	0.632696
13	L	4	I	F	H	2	2	2	FALSE	139	-1.69526	0.615628	-1.53138	0.820707	NA	NA	-1.63625	0.492474
13	L	4	L	F	H	2	2	2	FALSE	260	-2.64188	0.478011	-3.3359	0.74537	NA	NA	-2.84413	0.402376
13	L	4	S	F	H	2	2	2	FALSE	199.667	-1.52757	0.448299	-1.48441	0.585188	-1.88568	1.02826	-1.55162	0.336303
13	L	4	Y	F	H	2	2	2	FALSE	216.333	-1.74146	0.43815	-0.713244	0.552379	-1.37333	0.959661	-1.34765	0.323217
13	L	5	*	R	H	2	2	2	TRUE	105	-3.67181	1.01939	-4.17036	1.20813	NA	NA	-3.87914	0.779102
13	L	5	G	R	H	2	2	2	FALSE	78.5	-3.07669	0.918962	-4.05893	1.51942	NA	NA	-3.33976	0.78633
13	L	5	L	R	H	2	2	2	FALSE	227	-1.78863	0.476124	-1.41923	0.660563	NA	NA	-1.66233	0.386247
13	L	5	Q	R	H	2	2	2	FALSE	114.5	-0.689529	0.815014	-3.8874	1.00583	NA	NA	-1.95699	0.633227
13	L	6	D	H	H	2	2	2	FALSE	51	NA	NA	-1.10391	1.33015	NA	NA	-1.10391	1.33015
13	L	6	L	H	H	2	2	2	FALSE	251.5	-1.63166	0.481524	-2.37642	0.615093	NA	NA	-1.91465	0.379158
13	L	6	N	H	H	2	2	2	FALSE	53	NA	NA	-0.2683	1.28635	NA	NA	-0.2683	1.28635
13	L	6	Q	H	H	2	2	2	FALSE	146	-1.36698	0.621138	-2.24789	0.793805	NA	NA	-1.70151	0.489179
13	L	6	R	H	H	2	2	2	FALSE	207.5	-0.617125	0.471141	-0.678934	0.687012	NA	NA	-0.636896	0.388551
13	L	6	Y	H	H	2	2	2	FALSE	146	-1.37695	0.575297	-0.998397	0.813979	NA	NA	-1.25085	0.469802
13	L	7	A	D	H	2	2	2	FALSE	52	-1.27749	0.989821	-0.568605	1.29135	NA	NA	-1.01514	0.785592
13	L	7	E	D	H	2	2	2	FALSE	81.5	-2.06339	0.74681	-0.597025	1.17593	NA	NA	-1.64194	0.630421
13	L	7	G	D	H	2	2	2	FALSE	118	-0.755162	0.637732	-1.43947	0.895701	NA	NA	-0.985364	0.519507
13	L	7	N	D	H	2	2	2	FALSE	112	0.331577	0.675602	-2.28034	0.915162	NA	NA	-0.589763	0.543537
13	L	7	V	D	H	2	2	2	FALSE	131.5	-0.876269	0.672981	-1.86079	0.788236	NA	NA	-1.29135	0.511814
13	L	7	Y	D	H	2	2	2	FALSE	100	-0.912063	0.582722	-1.14261	1.30615	NA	NA	-0.950334	0.532163
13	L	8	A	S	H	2	2	2	FALSE	59	-2.04224	0.961612	NA	NA	NA	NA	-2.04224	0.961612
13	L	8	L	S	H	2	2	2	FALSE	55	NA	NA	-3.35247	1.52478	NA	NA	-3.35247	1.52478
13	L	8	P	S	H	2	2	2	FALSE	109	-0.612894	0.665868	-1.89823	0.942174	NA	NA	-1.04104	0.543774
13	L	8	T	S	H	2	2	2	FALSE	201.5	-2.21773	0.512759	-1.80981	0.723682	NA	NA	-2.08139	0.418382
13	L	9	*	G	H	2	2	2	TRUE	208	-4.51178	0.770381	-4.8778	1.29034	NA	NA	-4.60796	0.661459
13	L	9	E	G	H	2	2	2	FALSE	78	-0.710734	0.838294	-0.924719	1.01504	NA	NA	-0.797504	0.64636
13	L	9	R	G	H	2	2	2	FALSE	59	NA	NA	-1.33104	1.2447	NA	NA	-1.33104	1.2447
13	L	9	V	G	H	2	2	2	FALSE	67.5	-3.23084	0.944454	-3.29604	1.55392	NA	NA	-3.24843	0.807077
13	L	10	*	Y	H	2	2	2	TRUE	169.5	-4.26732	0.802513	-4.03137	1.08272	NA	NA	-4.18366	0.644723
13	L	10	C	Y	H	2	2	2	FALSE	133.5	-1.80556	0.593583	0.0500664	0.875584	NA	NA	-1.22127	0.491322
13	L	10	F	Y	H	2	2	2	FALSE	174.5	-1.935	0.511795	-0.815827	0.807983	NA	NA	-1.61454	0.432357
13	L	10	H	Y	H	2	2	2	FALSE	137	-0.576363	0.524594	-0.635905	0.723592	-1.76276	1.01687	-0.770055	0.391909
13	L	10	N	Y	H	2	2	2	FALSE	124.5	-0.647822	0.64937	-2.23632	0.866809	NA	NA	-1.21885	0.519708
13	L	11	*	E	H	2	2	2	TRUE	73	NA	NA	-4.7426	1.86373	NA	NA	-4.7426	1.86373
13	L	11	D	E	H	2	2	2	FALSE	274.667	NA	NA	-0.977608	0.459764	NA	NA	-0.977608	0.459764
13	L	11	G	E	H	2	2	2	FALSE	186	0.771309	0.465913	0.328272	0.556659	0.643844	1.07598	0.594266	0.339078
13	L	11	K	E	H	2	2	2	FALSE	81.5	0.863986	0.658091	1.3058	1.26308	NA	NA	0.958315	0.583625
13	L	11	V	E	H	2	2	2	FALSE	188.667	-1.40105	0.534763	-3.05804	0.626429	-2.28978	0.902736	-2.13165	0.370821
13	L	12	A	V	H	2	2	2	FALSE	179	-0.432171	0.494053	-0.762016	0.759162	NA	NA	-0.530306	0.414087
13	L	12	D	V	H	2	2	2	FALSE	156.5	-0.0593599	0.625158	-0.580299	0.684156	NA	NA	-0.296403	0.461504
13	L	12	F	V	H	2	2	2	FALSE	84.5	-1.28464	0.788447	0.14343	0.995286	NA	NA	-0.734004	0.618024
13	L	12	I	V	H	2	2	2	FALSE	138	-1.92234	0.590681	-1.74745	0.891278	NA	NA	-1.86897	0.492368
13	N	1	E	D	H	2	2	2	FALSE	96.5	0.633687	0.708204	1.62315	0.933166	NA	NA	0.995306	0.564137
13	N	1	G	D	H	2	2	2	FALSE	162.5	0.776416	0.485874	2.40791	0.847184	NA	NA	1.18023	0.421477
13	N	1	N	D	H	2	2	2	FALSE	93	1.67147	0.858217	0.342307	0.841365	NA	NA	0.993709	0.600804
13	N	1	V	D	H	2	2	2	FALSE	110.5	1.09185	0.627454	1.09043	0.925042	NA	NA	1.0914	0.519269
13	N	2	V	A	H	2	2	2	FALSE	57	NA	NA	-1.14126	1.25955	NA	NA	-1.14126	1.25955
13	N	3	D	E	H	2	2	2	FALSE	76	-0.840151	0.801965	NA	NA	NA	NA	-0.840151	0.801965
13	N	3	V	E	H	2	2	2	FALSE	67	-0.0398264	0.847168	1.26725	1.12602	NA	NA	0.432611	0.676968
13	N	4	I	F	H	2	2	2	FALSE	78	0.290867	0.91543	0.0837998	0.934331	NA	NA	0.189449	0.653887
13	N	4	L	F	H	2	2	2	FALSE	134.5	-0.127438	0.572422	0.821295	0.838651	NA	NA	0.174082	0.472789
13	N	4	S	F	H	2	2	2	FALSE	146	0.433293	0.596959	-0.799595	0.752482	NA	NA	-0.0429241	0.467667
13	N	4	Y	F	H	2	2	2	FALSE	56	0.813855	0.920322	0.216865	1.23518	NA	NA	0.600741	0.737992
13	N	5	L	R	H	2	2	2	FALSE	53.5	-0.409606	0.923466	1.07609	1.3004	NA	NA	0.0884558	0.752929
13	N	5	Q	R	H	2	2	2	FALSE	68	NA	NA	-2.01614	1.19406	NA	NA	-2.01614	1.19406
13	N	6	L	H	H	2	2	2	FALSE	72.5	0.101808	0.769619	0.615288	1.15423	NA	NA	0.259839	0.640329
13	N	6	Q	H	H	2	2	2	FALSE	93	0.467262	0.694722	1.00234	0.991	NA	NA	0.643576	0.568863
13	N	6	R	H	H	2	2	2	FALSE	106	1.12548	0.778927	-0.396718	0.808647	NA	NA	0.392865	0.560997
13	N	7	N	D	H	2	2	2	FALSE	61	NA	NA	0.930805	1.18986	NA	NA	0.930805	1.18986
13	N	7	V	D	H	2	2	2	FALSE	63.5	0.450887	0.869555	0.768016	1.15347	NA	NA	0.565805	0.694355
13	N	8	P	S	H	2	2	2	FALSE	66	NA	NA	0.489643	1.1462	NA	NA	0.489643	1.1462
13	N	8	T	S	H	2	2	2	FALSE	75.5	0.413725	0.781983	1.12273	1.07996	NA	NA	0.657594	0.633377
13	N	9	*	G	H	2	2	2	TRUE	84.5	-3.6948	0.907804	-2.90918	1.38315	NA	NA	-3.45827	0.75894
13	N	10	*	Y	H	2	2	2	TRUE	73	-3.29839	1.01247	-4.03137	1.52995	NA	NA	-3.52162	0.84433
13	N	11	D	E	H	2	2	2	FALSE	98	0.0265547	0.556835	0.855523	0.997161	-0.216827	1.07956	0.149346	0.443292
13	N	11	G	E	H	2	2	2	FALSE	98	-0.31608	0.620073	0.0467624	1.11634	NA	NA	-0.230529	0.542066
13	N	11	V	E	H	2	2	2	FALSE	76.5	0.0586137	0.846216	0.764153	0.997513	NA	NA	0.353874	0.645298
13	N	12	I	V	H	2	2	2	FALSE	69	NA	NA	1.11428	1.11831	NA	NA	1.11428	1.11831
13	P	1	V	D	H	2	2	2	FALSE	62	0.231948	0.871131	NA	NA	NA	NA	0.231948	0.871131
13	P	7	N	D	H	2	2	2	FALSE	51	-0.565296	0.969872	NA	NA	NA	NA	-0.565296	0.969872
13	Q	1	E	D	H	2	2	2	FALSE	258.667	-0.417552	0.375162	-0.528713	0.520286	-0.76117	0.845201	-0.490645	0.286311
13	Q	1	G	D	H	2	2	2	FALSE	201.333	0.765806	0.479297	0.0658407	0.514668	1.14335	0.998288	0.517911	0.330921
13	Q	1	N	D	H	2	2	2	FALSE	236	0.168141	0.454285	0.252056	0.606712	NA	NA	0.198287	0.363643
13	Q	1	V	D	H	2	2	2	FALSE	262.667	-0.372059	0.383007	-0.614524	0.497049	0.23749	0.900117	-0.390993	0.287494
13	Q	1	Y	D	H	2	2	2	FALSE	90.5	0.400441	0.797454	0.716111	0.900042	NA	NA	0.539268	0.596875
13	Q	2	E	A	H	2	2	2	FALSE	120.5	-1.51168	0.659846	-0.863306	0.856725	NA	NA	-1.27027	0.522766
13	Q	2	P	A	H	2	2	2	FALSE	67	NA	NA	-1.07938	1.1602	NA	NA	-1.07938	1.1602
13	Q	2	S	A	H	2	2	2	FALSE	82	-1.13784	0.757241	0.549191	1.0611	NA	NA	-0.568588	0.616382
13	Q	2	T	A	H	2	2	2	FALSE	145	-1.31661	0.569087	-0.0846803	0.940374	NA	NA	-0.986377	0.486874
13	Q	2	V	A	H	2	2	2	FALSE	150.667	-1.70237	0.563982	-1.30075	0.633436	-0.51606	1.04503	-1.3838	0.390677
13	Q	3	*	E	H	2	2	2	TRUE	70	-4.85226	1.62982	NA	NA	NA	NA	-4.85226	1.62982
13	Q	3	A	E	H	2	2	2	FALSE	80	NA	NA	-1.68019	1.083	NA	NA	-1.68019	1.083
13	Q	3	D	E	H	2	2	2	FALSE	85	-0.461446	0.752956	NA	NA	NA	NA	-0.461446	0.752956
13	Q	3	G	E	H	2	2	2	FALSE	104.5	0.800882	0.760941	-0.560436	0.832192	NA	NA	0.180985	0.56157
13	Q	3	K	E	H	2	2	2	FALSE	112.5	1.02528	0.682468	1.35467	0.834709	NA	NA	1.15725	0.528349
13	Q	3	V	E	H	2	2	2	FALSE	181.333	-0.381	0.431415	0.258669	0.659639	-0.143216	0.886356	-0.182793	0.334376
13	Q	4	I	F	H	2	2	2	FALSE	174.5	-0.449611	0.571234	-0.411041	0.667074	NA	NA	-0.433293	0.433888
13	Q	4	L	F	H	2	2	2	FALSE	282.333	-1.58708	0.348289	-1.52982	0.575647	-2.03267	0.71563	-1.63984	0.275094
13	Q	4	S	F	H	2	2	2	FALSE	191.667	-0.5395	0.470432	-0.907254	0.556249	0.235785	1.02394	-0.591094	0.338947
13	Q	4	Y	F	H	2	2	2	FALSE	130.5	0.032944	0.760931	-2.31984	0.806271	NA	NA	-1.07544	0.553394
13	Q	5	*	R	H	2	2	2	TRUE	152.5	-4.5091	0.990958	-3.54888	0.938281	NA	NA	-4.00279	0.681326
13	Q	5	L	R	H	2	2	2	FALSE	228	-3.11036	0.558565	-2.75628	0.70129	NA	NA	-2.97293	0.436915
13	Q	5	P	R	H	2	2	2	FALSE	79	NA	NA	-3.01943	1.21223	NA	NA	-3.01943	1.21223
13	Q	5	Q	R	H	2	2	2	FALSE	160.5	-1.48134	0.52572	-0.792644	0.825818	NA	NA	-1.28272	0.443481
13	Q	6	L	H	H	2	2	2	FALSE	198	-1.35385	0.441843	-2.39639	0.63738	-0.163236	1.07924	-1.53674	0.344166
13	Q	6	N	H	H	2	2	2	FALSE	79	NA	NA	-2.86434	1.18945	NA	NA	-2.86434	1.18945
13	Q	6	Q	H	H	2	2	2	FALSE	296.5	-1.18587	0.431715	-0.701781	0.539742	NA	NA	-0.996999	0.337137
13	Q	6	R	H	H	2	2	2	FALSE	194	-0.241972	0.502115	-0.404051	0.530645	0.281853	0.927511	-0.238135	0.33942
13	Q	6	Y	H	H	2	2	2	FALSE	122	-0.855076	0.626876	-2.02839	0.907968	NA	NA	-1.23383	0.515869
13	Q	7	A	D	H	2	2	2	FALSE	85	-0.275728	0.750661	NA	NA	NA	NA	-0.275728	0.750661
13	Q	7	E	D	H	2	2	2	FALSE	62	NA	NA	-3.473	1.46607	NA	NA	-3.473	1.46607
13	Q	7	G	D	H	2	2	2	FALSE	137	-0.137388	0.591879	-0.183997	0.803742	NA	NA	-0.153776	0.476595
13	Q	7	N	D	H	2	2	2	FALSE	109.5	-0.236037	0.69637	-0.300171	0.85643	NA	NA	-0.261563	0.540301
13	Q	7	V	D	H	2	2	2	FALSE	140.5	-1.1694	0.635296	-0.957367	0.759648	NA	NA	-1.08213	0.487335
13	Q	7	Y	D	H	2	2	2	FALSE	77	NA	NA	-1.94586	1.11794	NA	NA	-1.94586	1.11794
13	Q	8	*	S	H	2	2	2	TRUE	71	-3.48015	1.07275	NA	NA	NA	NA	-3.48015	1.07275
13	Q	8	L	S	H	2	2	2	FALSE	64	-1.60229	0.950905	-2.39809	1.19929	NA	NA	-1.90947	0.745109
13	Q	8	P	S	H	2	2	2	FALSE	306.5	-0.78441	0.393543	-0.65097	0.583082	NA	NA	-0.742647	0.326197
13	Q	8	T	S	H	2	2	2	FALSE	149.667	-0.281759	0.523357	-1.02136	0.662694	0.304984	0.971479	-0.433804	0.378301
13	Q	9	*	G	H	2	2	2	TRUE	138	-4.32341	0.886655	-3.29252	0.814174	-5.18102	1.74299	-3.91409	0.567071
13	Q	9	E	G	H	2	2	2	FALSE	108	-2.03451	0.772395	-3.88093	1.12609	NA	NA	-2.62526	0.636959
13	Q	9	R	G	H	2	2	2	FALSE	54	0.507121	0.930414	NA	NA	NA	NA	0.507121	0.930414
13	Q	9	V	G	H	2	2	2	FALSE	134.5	-2.17683	0.64794	-1.66787	0.837274	NA	NA	-1.98619	0.512422
13	Q	10	*	Y	H	2	2	2	TRUE	223.5	-5.50533	1.08557	-3.54727	0.87839	NA	NA	-4.32201	0.682849
13	Q	10	C	Y	H	2	2	2	FALSE	143.333	-0.519968	0.494492	0.0654872	0.711588	-0.146951	1.04249	-0.305292	0.37838
13	Q	10	F	Y	H	2	2	2	FALSE	138	0.124702	0.561481	0.560689	0.840355	NA	NA	0.259264	0.466861
13	Q	10	H	Y	H	2	2	2	FALSE	114	-0.460119	0.628858	-1.15261	0.929225	NA	NA	-0.67765	0.520804
13	Q	10	N	Y	H	2	2	2	FALSE	164	0.00819516	0.662413	-2.42604	0.686264	NA	NA	-1.16589	0.476606
13	Q	11	*	E	H	2	2	2	TRUE	68	NA	NA	-3.56594	1.42395	NA	NA	-3.56594	1.42395
13	Q	11	D	E	H	2	2	2	FALSE	279.333	-0.145929	0.403253	0.168556	0.464294	-0.404857	0.740063	-0.0677558	0.281558
13	Q	11	G	E	H	2	2	2	FALSE	232.333	-0.287462	0.391254	-0.320748	0.536861	0.554794	0.970768	-0.217116	0.300648
13	Q	11	K	E	H	2	2	2	FALSE	70	0.312529	0.931817	-1.59164	1.04091	NA	NA	-0.534578	0.694269
13	Q	11	V	E	H	2	2	2	FALSE	189.667	-0.111756	0.457904	-0.398743	0.591054	0.655303	0.883868	-0.0937612	0.334979
13	Q	12	A	V	H	2	2	2	FALSE	211.5	-0.479776	0.448078	-0.358623	0.714584	NA	NA	-0.445584	0.379619
13	Q	12	D	V	H	2	2	2	FALSE	180.667	-0.872575	0.428452	-0.717441	0.714213	-1.08736	0.856781	-0.871261	0.337673
13	Q	12	F	V	H	2	2	2	FALSE	51	0.3086	0.958498	NA	NA	NA	NA	0.3086	0.958498
13	Q	12	G	V	H	2	2	2	FALSE	56	-1.58459	0.958361	NA	NA	NA	NA	-1.58459	0.958361
13	Q	12	I	V	H	2	2	2	FALSE	118	-1.5739	0.648754	-2.26532	0.946126	NA	NA	-1.79502	0.535051
13	Q	12	L	V	H	2	2	2	FALSE	57	NA	NA	-1.70427	1.28375	NA	NA	-1.70427	1.28375
13	R	1	E	D	H	2	2	2	FALSE	264	-0.407276	0.382436	0.510157	0.498256	-0.423191	0.805189	-0.111419	0.283892
13	R	1	G	D	H	2	2	2	FALSE	179.667	-0.285308	0.448375	0.862884	0.646592	-0.0446936	0.866975	0.0673029	0.339102
13	R	1	N	D	H	2	2	2	FALSE	230	0.0828135	0.463441	-0.0551328	0.617211	NA	NA	0.0330797	0.370599
13	R	1	V	D	H	2	2	2	FALSE	305.667	-1.3659	0.395046	-0.77316	0.448908	-2.33476	0.763715	-1.26805	0.276452
13	R	1	Y	D	H	2	2	2	FALSE	68.5	-0.107325	0.919312	-2.0578	1.09699	NA	NA	-0.912009	0.704605
13	R	2	E	A	H	2	2	2	FALSE	96	-1.92552	0.718334	-0.983342	1.01632	NA	NA	-1.61164	0.586602
13	R	2	G	A	H	2	2	2	FALSE	52	-1.61057	0.99543	NA	NA	NA	NA	-1.61057	0.99543
13	R	2	S	A	H	2	2	2	FALSE	83.5	0.370099	0.931373	-1.66445	0.911244	NA	NA	-0.669397	0.651347
13	R	2	T	A	H	2	2	2	FALSE	126	0.323323	0.608561	0.311348	0.841526	NA	NA	0.319211	0.493128
13	R	2	V	A	H	2	2	2	FALSE	97.5	-1.24472	0.671948	-1.01988	1.04129	NA	NA	-1.17862	0.564599
13	R	3	*	E	H	2	2	2	TRUE	96	-3.55867	0.940402	NA	NA	NA	NA	-3.55867	0.940402
13	R	3	D	E	H	2	2	2	FALSE	57	-2.37871	0.990809	-0.909987	1.27536	NA	NA	-1.82591	0.782435
13	R	3	G	E	H	2	2	2	FALSE	158.5	-0.0471061	0.57727	0.50739	0.711594	NA	NA	0.172974	0.448305
13	R	3	K	E	H	2	2	2	FALSE	65	0.232486	0.85111	NA	NA	NA	NA	0.232486	0.85111
13	R	3	V	E	H	2	2	2	FALSE	138	-1.93599	0.61647	-1.76673	0.762878	-2.93649	0.840291	-2.1313	0.416455
13	R	4	I	F	H	2	2	2	FALSE	122.667	-0.928538	0.645779	-1.09603	0.70786	-1.40466	0.960229	-1.08382	0.427249
13	R	4	L	F	H	2	2	2	FALSE	259	-1.54088	0.401844	-1.36758	0.491298	NA	NA	-1.47142	0.311049
13	R	4	S	F	H	2	2	2	FALSE	179.333	-0.592833	0.521999	-1.18278	0.63409	-0.296551	0.720405	-0.703718	0.351713
13	R	4	Y	F	H	2	2	2	FALSE	228	-0.944576	0.431431	-0.364688	0.557155	-0.364847	0.739879	-0.663684	0.309779
13	R	5	*	R	H	2	2	2	TRUE	140	-3.21567	0.823566	-3.64125	0.912291	NA	NA	-3.40676	0.611317
13	R	5	G	R	H	2	2	2	FALSE	61.5	-2.90635	1.0497	-3.19967	1.39139	NA	NA	-3.01274	0.837978
13	R	5	L	R	H	2	2	2	FALSE	143.5	-0.590858	0.792281	-2.41792	0.700241	NA	NA	-1.61663	0.524683
13	R	5	P	R	H	2	2	2	FALSE	60	-1.26412	0.913077	NA	NA	NA	NA	-1.26412	0.913077
13	R	5	Q	R	H	2	2	2	FALSE	99.5	-0.206881	0.782153	-1.89857	0.890368	NA	NA	-0.943724	0.587621
13	R	6	L	H	H	2	2	2	FALSE	261	-1.00757	0.415753	-0.477459	0.633851	NA	NA	-0.848106	0.347643
13	R	6	P	H	H	2	2	2	FALSE	73	NA	NA	-2.08752	1.15742	NA	NA	-2.08752	1.15742
13	R	6	Q	H	H	2	2	2	FALSE	227.333	-0.735736	0.430671	-0.368406	0.539765	-0.107016	0.793597	-0.518759	0.309913
13	R	6	R	H	H	2	2	2	FALSE	160.667	0.038092	0.550033	-0.650592	0.580863	0.239191	1.02392	-0.21794	0.372083
13	R	6	Y	H	H	2	2	2	FALSE	110.5	-0.834568	0.614844	-0.769091	0.995025	NA	NA	-0.816476	0.523045
13	R	7	E	D	H	2	2	2	FALSE	141	NA	NA	-0.878285	0.796299	NA	NA	-0.878285	0.796299
13	R	7	G	D	H	2	2	2	FALSE	101.5	-0.7953	0.671591	-0.343921	0.967604	NA	NA	-0.648548	0.55172
13	R	7	N	D	H	2	2	2	FALSE	68.5	1.32672	0.910284	1.75648	1.03102	NA	NA	1.51498	0.682382
13	R	7	V	D	H	2	2	2	FALSE	124	-1.99006	0.627338	-0.4449	0.904131	NA	NA	-1.48791	0.515418
13	R	7	Y	D	H	2	2	2	FALSE	71	NA	NA	-1.70073	1.15039	NA	NA	-1.70073	1.15039
13	R	8	L	S	H	2	2	2	FALSE	72.5	-1.72977	0.842133	-0.612361	1.11689	NA	NA	-1.32476	0.672414
13	R	8	P	S	H	2	2	2	FALSE	91.5	-0.589577	0.83021	-0.426094	0.883779	NA	NA	-0.51294	0.605099
13	R	8	T	S	H	2	2	2	FALSE	147	-0.411787	0.510984	0.228957	0.716926	-1.07653	0.87908	-0.357126	0.376102
13	R	9	*	G	H	2	2	2	TRUE	134	-4.75217	0.957174	-3.90656	1.00067	-3.36658	1.20446	-4.10471	0.599818
13	R	9	E	G	H	2	2	2	FALSE	69	-0.919279	0.760765	-0.815215	1.29672	NA	NA	-0.892632	0.656173
13	R	9	R	G	H	2	2	2	FALSE	93	NA	NA	-0.552739	0.975467	NA	NA	-0.552739	0.975467
13	R	9	V	G	H	2	2	2	FALSE	74	-1.35575	0.849475	-0.97948	1.07306	NA	NA	-1.21079	0.666036
13	R	10	*	Y	H	2	2	2	TRUE	163.5	-3.78775	0.752244	-3.90021	1.00237	NA	NA	-3.82827	0.601661
13	R	10	C	Y	H	2	2	2	FALSE	124.333	-0.477567	0.536644	-0.274071	0.790208	-1.16732	1.00429	-0.536589	0.406044
13	R	10	F	Y	H	2	2	2	FALSE	128.667	0.225888	0.571849	-0.582108	0.700843	-0.0421501	1.01706	-0.0882907	0.406201
13	R	10	H	Y	H	2	2	2	FALSE	83.6667	-0.542068	0.664927	-1.00101	1.02857	0.0852945	1.03282	-0.504834	0.491208
13	R	10	N	Y	H	2	2	2	FALSE	104	0.0497201	0.726921	-0.676501	0.868121	NA	NA	-0.249602	0.557334
13	R	11	D	E	H	2	2	2	FALSE	304	0.197597	0.340727	NA	NA	NA	NA	0.197597	0.340727
13	R	11	G	E	H	2	2	2	FALSE	209	0.378154	0.46128	0.210473	0.535146	0.792835	0.834878	0.379132	0.322309
13	R	11	K	E	H	2	2	2	FALSE	58	0.107085	0.917033	-1.89022	1.26234	NA	NA	-0.582858	0.741926
13	R	11	V	E	H	2	2	2	FALSE	188.667	-2.85129	0.504669	-2.87888	0.701572	-1.38279	0.935629	-2.62293	0.375284
13	R	12	A	V	H	2	2	2	FALSE	211	-0.57299	0.472715	-0.236755	0.667381	NA	NA	-0.460657	0.385751
13	R	12	D	V	H	2	2	2	FALSE	122.333	0.2855	0.630461	-0.188558	0.691747	0.509192	0.977784	0.151606	0.420643
13	R	12	F	V	H	2	2	2	FALSE	51	NA	NA	-0.864055	1.32309	NA	NA	-0.864055	1.32309
13	R	12	I	V	H	2	2	2	FALSE	109.5	-0.927812	0.665079	-1.00809	0.917319	NA	NA	-0.955471	0.538448
13	R	12	L	V	H	2	2	2	FALSE	78	-0.506123	0.785979	NA	NA	NA	NA	-0.506123	0.785979
13	Y	1	E	D	H	2	2	2	FALSE	103	0.370467	0.645899	1.40174	0.968281	NA	NA	0.688039	0.537324
13	Y	1	G	D	H	2	2	2	FALSE	99	1.34909	0.754715	1.00062	0.863685	NA	NA	1.19822	0.56831
13	Y	1	H	D	H	2	2	2	FALSE	54	-0.786083	0.947545	NA	NA	NA	NA	-0.786083	0.947545
13	Y	1	N	D	H	2	2	2	FALSE	65	0.418409	0.781955	0.261724	1.28044	NA	NA	0.375847	0.667352
13	Y	1	V	D	H	2	2	2	FALSE	143.5	-1.22388	0.619937	-1.12996	0.765159	NA	NA	-1.18666	0.481682
13	Y	2	T	A	H	2	2	2	FALSE	93	0.557371	0.712258	NA	NA	NA	NA	0.557371	0.712258
13	Y	2	V	A	H	2	2	2	FALSE	60	NA	NA	-2.0453	1.27313	NA	NA	-2.0453	1.27313
13	Y	3	V	E	H	2	2	2	FALSE	82.5	-0.30651	0.680559	0.812842	1.19037	NA	NA	-0.0307654	0.590817
13	Y	4	I	F	H	2	2	2	FALSE	74.5	-0.902743	0.743495	0.0978429	1.20503	NA	NA	-0.626864	0.63275
13	Y	4	L	F	H	2	2	2	FALSE	107	-0.253705	0.567491	-1.04889	1.17701	NA	NA	-0.403692	0.511178
13	Y	4	S	F	H	2	2	2	FALSE	123.5	0.462469	0.592576	0.508368	0.884616	NA	NA	0.476686	0.492324
13	Y	4	Y	F	H	2	2	2	FALSE	109	0.177493	0.788616	-0.749142	0.792751	NA	NA	-0.283401	0.559092
13	Y	5	*	R	H	2	2	2	TRUE	74	-3.52153	1.06059	NA	NA	NA	NA	-3.52153	1.06059
13	Y	5	L	R	H	2	2	2	FALSE	51	NA	NA	-0.406558	1.31344	NA	NA	-0.406558	1.31344
13	Y	5	Q	R	H	2	2	2	FALSE	55	NA	NA	-0.627983	1.26887	NA	NA	-0.627983	1.26887
13	Y	6	L	H	H	2	2	2	FALSE	131	-2.36955	0.622622	-1.28159	0.91119	NA	NA	-2.02326	0.514071
13	Y	6	Q	H	H	2	2	2	FALSE	112.5	-0.446758	0.695299	-0.363682	0.839846	NA	NA	-0.412974	0.535575
13	Y	6	R	H	H	2	2	2	FALSE	100	0.208337	0.706845	0.358401	0.910185	NA	NA	0.264792	0.558269
13	Y	6	Y	H	H	2	2	2	FALSE	60	0.677172	0.882375	NA	NA	NA	NA	0.677172	0.882375
13	Y	7	G	D	H	2	2	2	FALSE	71	0.798793	0.87463	1.06054	1.03259	NA	NA	0.908138	0.667393
13	Y	7	N	D	H	2	2	2	FALSE	59	0.596815	0.890149	NA	NA	NA	NA	0.596815	0.890149
13	Y	7	V	D	H	2	2	2	FALSE	61.5	0.0540459	0.810844	1.38636	1.29937	NA	NA	0.427454	0.687895
13	Y	8	P	S	H	2	2	2	FALSE	63	-1.0182	0.936681	0.0194466	1.1166	NA	NA	-0.589603	0.71762
13	Y	8	T	S	H	2	2	2	FALSE	52	1.188	0.944599	NA	NA	NA	NA	1.188	0.944599
13	Y	9	*	G	H	2	2	2	TRUE	62	NA	NA	-3.473	1.46607	NA	NA	-3.473	1.46607
13	Y	9	E	G	H	2	2	2	FALSE	62	-2.42831	0.971819	NA	NA	NA	NA	-2.42831	0.971819
13	Y	10	*	Y	H	2	2	2	TRUE	58	NA	NA	-3.11648	1.43283	NA	NA	-3.11648	1.43283
13	Y	10	C	Y	H	2	2	2	FALSE	54	-0.489818	0.908934	0.403084	1.31705	NA	NA	-0.20175	0.748081
13	Y	10	F	Y	H	2	2	2	FALSE	107.5	0.0180962	0.66234	0.400249	0.905677	NA	NA	0.151262	0.534627
13	Y	10	H	Y	H	2	2	2	FALSE	57	NA	NA	0.986113	1.23057	NA	NA	0.986113	1.23057
13	Y	10	N	Y	H	2	2	2	FALSE	50	NA	NA	1.47243	1.31203	NA	NA	1.47243	1.31203
13	Y	11	D	E	H	2	2	2	FALSE	174.5	0.123287	0.641888	0.389279	0.612598	NA	NA	0.26249	0.443165
13	Y	11	G	E	H	2	2	2	FALSE	82	0.725716	0.73926	0.905403	1.05272	NA	NA	0.785061	0.604989
13	Y	11	V	E	H	2	2	2	FALSE	98.5	0.552009	0.830349	0.335459	0.821707	NA	NA	0.442601	0.584066
13	Y	12	A	V	H	2	2	2	FALSE	83.5	0.232798	0.666885	1.2422	1.1986	NA	NA	0.471407	0.582757
13	Y	12	D	V	H	2	2	2	FALSE	146	NA	NA	-2.37695	0.836104	NA	NA	-2.37695	0.836104
14	D	1	G	D	H	2	2	2	FALSE	55	NA	NA	-1.21934	1.28486	NA	NA	-1.21934	1.28486
14	D	1	V	D	H	2	2	2	FALSE	70	-1.00211	0.838808	NA	NA	NA	NA	-1.00211	0.838808
14	D	11	D	E	H	2	2	2	FALSE	58	-0.752182	0.913985	NA	NA	NA	NA	-0.752182	0.913985
14	D	12	D	V	H	2	2	2	FALSE	50	NA	NA	-2.40414	1.42925	NA	NA	-2.40414	1.42925
14	L	1	E	D	H	2	2	2	FALSE	301	0.0389687	0.371302	-0.394485	0.449328	0.0697509	0.796302	-0.113269	0.269351
14	L	1	G	D	H	2	2	2	FALSE	252.667	0.151153	0.33485	1.18783	0.61589	0.387492	0.957907	0.387657	0.281219
14	L	1	H	D	H	2	2	2	FALSE	63	-0.0261276	0.926586	1.46683	1.10156	NA	NA	0.592505	0.709086
14	L	1	N	D	H	2	2	2	FALSE	206	0.831804	0.493823	0.966262	0.637318	NA	NA	0.882246	0.390354
14	L	1	V	D	H	2	2	2	FALSE	294.667	-0.592168	0.38754	-1.80417	0.448135	0.107497	0.993445	-1.01318	0.281149
14	L	1	Y	D	H	2	2	2	FALSE	73.5	-0.497278	0.736687	-0.0415659	1.22701	NA	NA	-0.376532	0.631595
14	L	2	E	A	H	2	2	2	FALSE	113.5	-0.710142	0.670242	-1.17595	0.877321	NA	NA	-0.881814	0.532602
14	L	2	P	A	H	2	2	2	FALSE	83	0.300408	0.754453	NA	NA	NA	NA	0.300408	0.754453
14	L	2	S	A	H	2	2	2	FALSE	135.5	-0.489569	0.626726	-0.0914981	0.772571	NA	NA	-0.331578	0.486715
14	L	2	T	A	H	2	2	2	FALSE	153	-0.730514	0.543993	0.948364	0.792371	NA	NA	-0.192693	0.448474
14	L	2	V	A	H	2	2	2	FALSE	131	-0.705016	0.604089	-1.1974	0.846308	NA	NA	-0.871209	0.491682
14	L	3	*	E	H	2	2	2	TRUE	125.5	-3.34101	0.748711	-4.47588	1.38437	NA	NA	-3.59784	0.658566
14	L	3	D	E	H	2	2	2	FALSE	67	NA	NA	-1.30388	1.16726	NA	NA	-1.30388	1.16726
14	L	3	G	E	H	2	2	2	FALSE	215	0.854299	0.534052	0.614427	0.577387	NA	NA	0.743702	0.392058
14	L	3	K	E	H	2	2	2	FALSE	68	1.19852	0.859363	-1.19483	1.11493	NA	NA	0.306558	0.680643
14	L	3	V	E	H	2	2	2	FALSE	158.333	-0.333116	0.472765	0.786758	0.672954	-0.37573	0.996007	-0.017148	0.360601
14	L	4	I	F	H	2	2	2	FALSE	215.5	-0.678264	0.505981	-0.48762	0.613658	NA	NA	-0.601109	0.39039
14	L	4	L	F	H	2	2	2	FALSE	242	-0.483	0.38728	0.301424	0.503098	-0.854916	1.08527	-0.240273	0.295305
14	L	4	S	F	H	2	2	2	FALSE	161.667	-0.818016	0.427874	0.250797	0.765321	-0.190932	1.03422	-0.520517	0.351268
14	L	4	Y	F	H	2	2	2	FALSE	218	-0.753294	0.399197	0.401911	0.584681	-0.591043	0.914995	-0.409561	0.310163
14	L	5	*	R	H	2	2	2	TRUE	209	-2.93712	0.641922	-3.78251	0.77279	NA	NA	-3.28228	0.493788
14	L	5	L	R	H	2	2	2	FALSE	174	-2.19639	0.569311	-1.24195	0.730909	NA	NA	-1.83599	0.449141
14	L	5	Q	R	H	2	2	2	FALSE	130	-0.596936	0.580328	-1.58577	0.904391	NA	NA	-0.885339	0.488421
14	L	6	D	H	H	2	2	2	FALSE	76	NA	NA	-3.38841	1.30527	NA	NA	-3.38841	1.30527
14	L	6	L	H	H	2	2	2	FALSE	218.667	-1.40781	0.387039	-1.01403	0.620732	-0.208764	1.01009	-1.19347	0.312332
14	L	6	N	H	H	2	2	2	FALSE	58	-1.332	0.930979	NA	NA	NA	NA	-1.332	0.930979
14	L	6	Q	H	H	2	2	2	FALSE	287	-0.323248	0.401247	-0.855615	0.589608	NA	NA	-0.491759	0.331719
14	L	6	R	H	H	2	2	2	FALSE	187	0.595321	0.541029	-0.932068	0.655127	NA	NA	-0.0239943	0.417164
14	L	6	Y	H	H	2	2	2	FALSE	76.5	-0.1902	0.763042	-1.25982	1.13253	NA	NA	-0.524149	0.632813
14	L	7	A	D	H	2	2	2	FALSE	94	-0.428558	0.716386	NA	NA	NA	NA	-0.428558	0.716386
14	L	7	E	D	H	2	2	2	FALSE	87	0.231036	0.717855	-0.389944	1.0363	NA	NA	0.0296811	0.590104
14	L	7	G	D	H	2	2	2	FALSE	166	0.414808	0.554864	1.19082	0.701711	NA	NA	0.71335	0.435237
14	L	7	N	D	H	2	2	2	FALSE	105.5	0.217219	0.579549	2.0285	1.12454	NA	NA	0.597338	0.515159
14	L	7	V	D	H	2	2	2	FALSE	238.5	-0.79051	0.403597	0.790205	0.736659	NA	NA	-0.425574	0.353955
14	L	7	Y	D	H	2	2	2	FALSE	69	NA	NA	-0.136666	1.12623	NA	NA	-0.136666	1.12623
14	L	8	*	S	H	2	2	2	TRUE	84	NA	NA	-1.72928	1.05923	NA	NA	-1.72928	1.05923
14	L	8	A	S	H	2	2	2	FALSE	62	NA	NA	0.35677	1.18338	NA	NA	0.35677	1.18338
14	L	8	L	S	H	2	2	2	FALSE	86	-1.5813	0.717212	-0.370953	1.11316	NA	NA	-1.22625	0.602907
14	L	8	P	S	H	2	2	2	FALSE	256.5	-0.299178	0.435496	1.00726	0.591205	NA	NA	0.160362	0.350635
14	L	8	T	S	H	2	2	2	FALSE	210.667	-0.545168	0.464691	-2.02135	0.543341	0.227064	0.945704	-0.997953	0.330836
14	L	9	*	G	H	2	2	2	TRUE	230	-4.38795	0.78584	-4.83472	1.06122	NA	NA	-4.54618	0.631538
14	L	9	E	G	H	2	2	2	FALSE	74	-2.23122	1.00241	-2.47534	1.06066	NA	NA	-2.34639	0.728535
14	L	9	R	G	H	2	2	2	FALSE	120	-0.375358	0.636875	NA	NA	NA	NA	-0.375358	0.636875
14	L	9	V	G	H	2	2	2	FALSE	60.5	0.39641	0.856433	1.18247	1.22985	NA	NA	0.653112	0.702813
14	L	10	*	Y	H	2	2	2	TRUE	322	-4.20739	0.54986	-4.54529	0.966789	NA	NA	-4.28998	0.477963
14	L	10	C	Y	H	2	2	2	FALSE	163.333	0.319909	0.506541	-0.561606	0.601814	0.220903	1.04078	-0.0131754	0.363178
14	L	10	F	Y	H	2	2	2	FALSE	205.5	-0.814811	0.473212	-0.758104	0.695281	NA	NA	-0.796859	0.391202
14	L	10	H	Y	H	2	2	2	FALSE	110	0.547101	0.7359	-0.581181	0.816739	NA	NA	0.0415462	0.546712
14	L	10	N	Y	H	2	2	2	FALSE	213.5	-0.0339937	0.468893	-0.200606	0.65893	NA	NA	-0.0900008	0.382039
14	L	11	D	E	H	2	2	2	FALSE	229.333	-0.255656	0.414553	-0.432544	0.533342	0.823327	0.869261	-0.180021	0.306313
14	L	11	G	E	H	2	2	2	FALSE	217.667	0.630274	0.40172	1.07364	0.553887	1.05733	0.990987	0.809762	0.308983
14	L	11	K	E	H	2	2	2	FALSE	69	0.590958	0.786031	-0.817923	1.1992	NA	NA	0.167563	0.657397
14	L	11	V	E	H	2	2	2	FALSE	154	0.0325518	0.518511	-0.489561	0.62289	0.230389	1.06776	-0.130838	0.373353
14	L	12	A	V	H	2	2	2	FALSE	218	-0.395787	0.514765	-1.70679	0.615432	NA	NA	-0.935434	0.394852
14	L	12	D	V	H	2	2	2	FALSE	227.333	-0.0137036	0.384784	0.590261	0.575287	-0.222891	0.901981	0.128761	0.301445
14	L	12	F	V	H	2	2	2	FALSE	65	0.417889	0.931024	-3.16391	1.26049	NA	NA	-0.846433	0.74889
14	L	12	I	V	H	2	2	2	FALSE	124.5	-0.276339	0.659021	-0.627174	0.802459	NA	NA	-0.417652	0.509287
14	L	12	L	V	H	2	2	2	FALSE	55	NA	NA	-2.14119	1.33744	NA	NA	-2.14119	1.33744
14	L	13	L	H	H	2	2	2	FALSE	228.5	-3.02895	0.522952	-2.2546	0.713994	NA	NA	-2.75858	0.421892
14	L	13	N	H	H	2	2	2	FALSE	66	0.054294	0.90182	-1.12345	1.10533	NA	NA	-0.416376	0.698758
14	L	13	Q	H	H	2	2	2	FALSE	231.5	-1.07822	0.477674	-0.405177	0.610439	NA	NA	-0.822615	0.376189
14	L	13	R	H	H	2	2	2	FALSE	185.667	-1.44985	0.440575	-0.430459	0.619726	0.241389	1.07727	-0.972716	0.340656
14	L	13	Y	H	H	2	2	2	FALSE	123	-0.0106981	0.674721	-0.350518	0.790907	NA	NA	-0.153837	0.513311
14	N	1	E	D	H	2	2	2	FALSE	97.5	-0.264546	0.680129	0.276773	0.977897	NA	NA	-0.0880655	0.558361
14	N	1	G	D	H	2	2	2	FALSE	115	0.118656	0.686645	1.16624	0.818844	NA	NA	0.551162	0.526142
14	N	1	N	D	H	2	2	2	FALSE	93.5	-0.311956	0.632324	0.937657	1.144	NA	NA	-0.0195258	0.553413
14	N	1	V	D	H	2	2	2	FALSE	151.5	-0.806544	0.561279	-0.616485	0.782836	NA	NA	-0.742014	0.456149
14	N	2	S	A	H	2	2	2	FALSE	58	NA	NA	-2.30062	1.31676	NA	NA	-2.30062	1.31676
14	N	2	T	A	H	2	2	2	FALSE	62	0.245837	0.87102	NA	NA	NA	NA	0.245837	0.87102
14	N	2	V	A	H	2	2	2	FALSE	58	-2.36162	0.997488	NA	NA	NA	NA	-2.36162	0.997488
14	N	3	*	E	H	2	2	2	TRUE	52	NA	NA	-4.40132	1.98662	NA	NA	-4.40132	1.98662
14	N	3	V	E	H	2	2	2	FALSE	52	NA	NA	-0.617292	1.30465	NA	NA	-0.617292	1.30465
14	N	4	I	F	H	2	2	2	FALSE	58	NA	NA	-1.93067	1.28658	NA	NA	-1.93067	1.28658
14	N	4	L	F	H	2	2	2	FALSE	69	-0.746863	0.898731	-0.293366	1.06123	NA	NA	-0.557456	0.685833
14	N	4	S	F	H	2	2	2	FALSE	117	-0.255455	0.605714	-0.74895	0.934566	NA	NA	-0.401434	0.508293
14	N	4	Y	F	H	2	2	2	FALSE	72	0.257377	0.759228	1.11905	1.17956	NA	NA	0.509791	0.638414
14	N	5	*	R	H	2	2	2	TRUE	71	-4.86644	1.62701	NA	NA	NA	NA	-4.86644	1.62701
14	N	5	L	R	H	2	2	2	FALSE	75.5	0.124892	0.755689	-1.21638	1.15576	NA	NA	-0.276797	0.632488
14	N	6	L	H	H	2	2	2	FALSE	80.5	-2.40736	0.830118	-1.39538	1.09931	NA	NA	-2.03986	0.66246
14	N	6	Q	H	H	2	2	2	FALSE	107	0.152755	0.66739	NA	NA	NA	NA	0.152755	0.66739
14	N	6	R	H	H	2	2	2	FALSE	103	-0.368196	0.615869	0.598658	1.05405	NA	NA	-0.122125	0.531754
14	N	6	Y	H	H	2	2	2	FALSE	51	NA	NA	-0.695987	1.31903	NA	NA	-0.695987	1.31903
14	N	7	G	D	H	2	2	2	FALSE	53	NA	NA	0.0491324	1.28245	NA	NA	0.0491324	1.28245
14	N	8	T	S	H	2	2	2	FALSE	66	-0.672755	0.897205	-2.07364	1.16443	NA	NA	-1.19462	0.710707
14	N	9	*	G	H	2	2	2	TRUE	66	-2.97089	1.02691	-3.56594	1.42395	NA	NA	-3.17448	0.832909
14	N	9	E	G	H	2	2	2	FALSE	64	NA	NA	-3.21551	1.38375	NA	NA	-3.21551	1.38375
14	N	10	*	Y	H	2	2	2	TRUE	77	-4.25442	1.2648	NA	NA	NA	NA	-4.25442	1.2648
14	N	10	F	Y	H	2	2	2	FALSE	72	-1.13869	0.842503	-0.000201883	1.08627	NA	NA	-0.71107	0.665737
14	N	10	H	Y	H	2	2	2	FALSE	56	-0.940234	0.93452	NA	NA	NA	NA	-0.940234	0.93452
14	N	10	N	Y	H	2	2	2	FALSE	76	NA	NA	-1.72011	1.11295	NA	NA	-1.72011	1.11295
14	N	11	D	E	H	2	2	2	FALSE	87	-0.144741	0.682197	1.89188	1.10078	NA	NA	0.420413	0.579869
14	N	11	G	E	H	2	2	2	FALSE	67	-0.18149	0.896858	-0.495506	1.08493	NA	NA	-0.308964	0.691252
14	N	11	V	E	H	2	2	2	FALSE	97	NA	NA	-0.25484	0.951613	NA	NA	-0.25484	0.951613
14	N	12	A	V	H	2	2	2	FALSE	81.5	-0.0159752	0.887594	0.0232925	0.921136	NA	NA	0.0029307	0.639153
14	N	12	D	V	H	2	2	2	FALSE	66	-0.029331	0.840823	-0.576035	1.1665	NA	NA	-0.216257	0.682096
14	N	12	I	V	H	2	2	2	FALSE	58	-1.14276	0.90904	-0.159377	1.25006	NA	NA	-0.80261	0.735201
14	N	13	L	H	H	2	2	2	FALSE	59	-0.721545	0.946082	-1.54722	1.20403	NA	NA	-1.03673	0.743904
14	N	13	N	H	H	2	2	2	FALSE	66	-0.502957	0.853127	NA	NA	NA	NA	-0.502957	0.853127
14	N	13	R	H	H	2	2	2	FALSE	70	-0.419028	0.833424	-1.16688	1.12964	NA	NA	-0.682621	0.670652
14	P	1	E	D	H	2	2	2	FALSE	60	NA	NA	-0.361164	1.21048	NA	NA	-0.361164	1.21048
14	P	1	G	D	H	2	2	2	FALSE	71	0.123991	0.815829	0.625841	1.10448	NA	NA	0.301148	0.656219
14	P	1	V	D	H	2	2	2	FALSE	90	NA	NA	-1.7148	1.02278	NA	NA	-1.7148	1.02278
14	P	2	T	A	H	2	2	2	FALSE	104	-1.99006	0.725015	NA	NA	NA	NA	-1.99006	0.725015
14	P	5	Q	R	H	2	2	2	FALSE	58	-0.459512	0.90843	NA	NA	NA	NA	-0.459512	0.90843
14	P	6	Q	H	H	2	2	2	FALSE	77	NA	NA	-1.51839	1.09682	NA	NA	-1.51839	1.09682
14	P	6	R	H	H	2	2	2	FALSE	70.5	0.35288	0.831574	0.337912	1.09097	NA	NA	0.34738	0.661356
14	P	11	V	E	H	2	2	2	FALSE	57	-0.535939	0.917562	NA	NA	NA	NA	-0.535939	0.917562
14	P	13	Q	H	H	2	2	2	FALSE	67	0.432975	0.966943	-2.30329	1.09491	NA	NA	-0.765988	0.724772
14	Q	1	E	D	H	2	2	2	FALSE	257.333	-0.444594	0.421845	-1.60246	0.489507	-0.139754	0.818156	-0.832371	0.297657
14	Q	1	G	D	H	2	2	2	FALSE	242.667	-0.219535	0.379304	0.652807	0.52141	0.429549	0.999768	0.112218	0.293239
14	Q	1	N	D	H	2	2	2	FALSE	196.5	0.0606252	0.501485	0.293757	0.662765	NA	NA	0.145504	0.399907
14	Q	1	V	D	H	2	2	2	FALSE	280.667	-1.04985	0.408166	-1.09713	0.469774	-0.670464	0.762886	-1.01413	0.285692
14	Q	1	Y	D	H	2	2	2	FALSE	56	NA	NA	-0.898951	1.26366	NA	NA	-0.898951	1.26366
14	Q	2	E	A	H	2	2	2	FALSE	97	-1.44286	0.793719	-2.21987	0.938976	NA	NA	-1.76668	0.606169
14	Q	2	S	A	H	2	2	2	FALSE	111	-1.59801	0.721326	-2.19627	0.902396	NA	NA	-1.83125	0.563441
14	Q	2	T	A	H	2	2	2	FALSE	142	0.318394	0.593236	-1.33444	0.787416	NA	NA	-0.280072	0.473815
14	Q	2	V	A	H	2	2	2	FALSE	120.5	-2.2843	0.749991	-2.97807	0.909974	NA	NA	-2.56493	0.578753
14	Q	3	D	E	H	2	2	2	FALSE	86.5	NA	NA	-0.0259092	0.864191	NA	NA	-0.0259092	0.864191
14	Q	3	G	E	H	2	2	2	FALSE	68.5	-0.587233	0.895576	-0.00518617	1.06502	NA	NA	-0.346139	0.685442
14	Q	3	K	E	H	2	2	2	FALSE	68.5	-0.380618	0.756274	1.01499	1.27593	NA	NA	-0.0177831	0.650578
14	Q	3	V	E	H	2	2	2	FALSE	116.333	-0.53281	0.5998	-1.44384	0.873448	-1.7594	0.847154	-1.06224	0.427031
14	Q	4	I	F	H	2	2	2	FALSE	123.5	0.419392	0.599186	-0.916758	0.887084	NA	NA	0.000775512	0.49653
14	Q	4	L	F	H	2	2	2	FALSE	229.667	-0.808021	0.437359	-1.56134	0.545655	NA	NA	-1.10269	0.341265
14	Q	4	S	F	H	2	2	2	FALSE	226	-0.940234	0.483982	-2.15846	0.649985	NA	NA	-1.37475	0.388189
14	Q	4	Y	F	H	2	2	2	FALSE	155	0.158378	0.498553	1.80361	0.636125	-0.891886	1.04882	0.578583	0.367519
14	Q	5	*	R	H	2	2	2	TRUE	93.5	-3.24282	0.940997	-3.98368	1.265	NA	NA	-3.50673	0.755012
14	Q	5	L	R	H	2	2	2	FALSE	119	-0.325048	0.656642	-1.53138	0.858689	NA	NA	-0.770176	0.52161
14	Q	5	P	R	H	2	2	2	FALSE	58	-1.83099	0.955421	NA	NA	NA	NA	-1.83099	0.955421
14	Q	5	Q	R	H	2	2	2	FALSE	87	-1.70237	0.790066	-1.60079	1.01796	NA	NA	-1.66419	0.624139
14	Q	6	D	H	H	2	2	2	FALSE	71.5	-2.12359	0.929797	-1.01491	1.06711	NA	NA	-1.64512	0.70102
14	Q	6	L	H	H	2	2	2	FALSE	241	-2.23918	0.545434	-1.54906	0.571198	NA	NA	-1.91003	0.394474
14	Q	6	N	H	H	2	2	2	FALSE	55	-0.789864	0.956414	-2.17713	1.31688	NA	NA	-1.26892	0.773855
14	Q	6	P	H	H	2	2	2	FALSE	67	NA	NA	-4.65631	1.89167	NA	NA	-4.65631	1.89167
14	Q	6	Q	H	H	2	2	2	FALSE	266	-1.28202	0.387444	-1.90761	0.508531	0.145369	0.97204	-1.36042	0.293776
14	Q	6	R	H	H	2	2	2	FALSE	164	-1.24812	0.565442	-0.22584	0.72397	NA	NA	-0.860793	0.44563
14	Q	6	Y	H	H	2	2	2	FALSE	122	-0.522536	0.612917	-0.293961	0.878503	NA	NA	-0.447701	0.502668
14	Q	7	A	D	H	2	2	2	FALSE	54	NA	NA	0.733582	1.26538	NA	NA	0.733582	1.26538
14	Q	7	E	D	H	2	2	2	FALSE	82.5	0.0683319	0.810719	-0.726399	0.97817	NA	NA	-0.255288	0.624197
14	Q	7	G	D	H	2	2	2	FALSE	81	-0.577094	0.807656	-1.47578	1.02464	NA	NA	-0.921482	0.634299
14	Q	7	N	D	H	2	2	2	FALSE	74.5	0.744662	0.795649	-1.57245	1.11355	NA	NA	-0.038478	0.647376
14	Q	7	V	D	H	2	2	2	FALSE	147.5	0.0158512	0.599245	-1.48856	0.759009	NA	NA	-0.561813	0.470329
14	Q	8	*	S	H	2	2	2	TRUE	119	NA	NA	-3.27651	1.02511	NA	NA	-3.27651	1.02511
14	Q	8	A	S	H	2	2	2	FALSE	80.5	-0.617368	0.808324	-0.391987	1.00622	NA	NA	-0.528968	0.63017
14	Q	8	L	S	H	2	2	2	FALSE	64	-1.89849	0.856871	-1.95776	1.32305	NA	NA	-1.916	0.719209
14	Q	8	P	S	H	2	2	2	FALSE	139.333	-1.75334	0.577347	-0.534378	0.673236	-1.2098	1.00495	-1.23247	0.401723
14	Q	8	T	S	H	2	2	2	FALSE	146.333	-0.19419	0.452119	-0.484014	0.786736	-0.697766	1.06455	-0.31768	0.367853
14	Q	9	*	G	H	2	2	2	TRUE	122.667	-4.81836	0.949139	-4.31026	1.43288	-4.01981	1.17166	-4.46181	0.655749
14	Q	9	E	G	H	2	2	2	FALSE	106.5	-2.06044	0.732314	-3.06304	1.03374	NA	NA	-2.39546	0.597564
14	Q	9	V	G	H	2	2	2	FALSE	83	NA	NA	-2.37177	1.10717	NA	NA	-2.37177	1.10717
14	Q	10	*	Y	H	2	2	2	TRUE	114	-5.13636	1.5798	-3.96644	1.10085	NA	NA	-4.34884	0.903196
14	Q	10	C	Y	H	2	2	2	FALSE	146	-0.652552	0.488184	0.0878322	0.756207	-0.161847	0.906969	-0.388424	0.373708
14	Q	10	F	Y	H	2	2	2	FALSE	102.5	0.482272	0.767083	-0.702197	0.843951	NA	NA	-0.0535763	0.567644
14	Q	10	H	Y	H	2	2	2	FALSE	130.5	-0.479199	0.702593	-1.615	0.757958	NA	NA	-1.0041	0.515271
14	Q	10	N	Y	H	2	2	2	FALSE	120	-0.236579	0.584558	0.512052	0.941178	NA	NA	-0.0281811	0.496575
14	Q	11	*	E	H	2	2	2	TRUE	73	NA	NA	-3.63732	1.39337	NA	NA	-3.63732	1.39337
14	Q	11	D	E	H	2	2	2	FALSE	238	0.111788	0.41176	NA	NA	-0.511295	0.593787	-0.0905402	0.338365
14	Q	11	G	E	H	2	2	2	FALSE	182.667	0.278627	0.452479	0.495759	0.621553	-0.329169	0.87292	0.251808	0.337385
14	Q	11	K	E	H	2	2	2	FALSE	56	-0.186462	0.920283	NA	NA	NA	NA	-0.186462	0.920283
14	Q	11	V	E	H	2	2	2	FALSE	168.667	0.342271	0.479542	-0.0306658	0.637938	-0.338775	0.892335	0.122503	0.352199
14	Q	12	A	V	H	2	2	2	FALSE	163	0.199386	0.609225	-1.03082	0.677682	NA	NA	-0.350459	0.453062
14	Q	12	D	V	H	2	2	2	FALSE	152.667	-0.426354	0.537674	-0.772454	0.659352	-0.41895	0.873433	-0.537582	0.376086
14	Q	12	F	V	H	2	2	2	FALSE	66.5	-0.0490844	0.902895	-0.177736	1.08082	NA	NA	-0.101963	0.692927
14	Q	12	I	V	H	2	2	2	FALSE	115	0.0955392	0.765	-2.5525	0.839947	NA	NA	-1.10509	0.565581
14	Q	13	L	H	H	2	2	2	FALSE	172.333	-1.98595	0.481319	-0.843167	0.637623	-1.39986	1.07505	-1.55174	0.361754
14	Q	13	N	H	H	2	2	2	FALSE	106.5	0.367187	0.728728	-0.00740769	0.840122	NA	NA	0.206354	0.55049
14	Q	13	Q	H	H	2	2	2	FALSE	139.333	-0.937031	0.519474	0.378592	0.759659	-0.980796	0.887563	-0.605451	0.386104
14	Q	13	R	H	H	2	2	2	FALSE	200.5	-0.721921	0.444137	0.40783	0.785831	NA	NA	-0.448412	0.386655
14	Q	13	Y	H	H	2	2	2	FALSE	117.5	0.351208	0.580847	1.03405	0.964002	NA	NA	0.533085	0.497514
14	R	1	E	D	H	2	2	2	FALSE	134.667	0.0688266	0.53111	0.443545	0.707765	-0.647825	1.0212	0.078186	0.392223
14	R	1	G	D	H	2	2	2	FALSE	258.333	-0.541163	0.366356	-0.140881	0.543735	0.460304	0.839559	-0.314688	0.285694
14	R	1	N	D	H	2	2	2	FALSE	134.667	0.811106	0.587167	-0.172148	0.660353	0.276289	0.971573	0.359908	0.3999
14	R	1	V	D	H	2	2	2	FALSE	253.667	-2.56572	0.412472	-1.89356	0.566381	-2.1378	0.897019	-2.30911	0.312533
14	R	1	Y	D	H	2	2	2	FALSE	64	NA	NA	-1.4557	1.20007	NA	NA	-1.4557	1.20007
14	R	2	E	A	H	2	2	2	FALSE	103	-1.44533	0.66604	-1.9393	1.03396	NA	NA	-1.59019	0.559925
14	R	2	P	A	H	2	2	2	FALSE	58	-0.903005	0.917532	NA	NA	NA	NA	-0.903005	0.917532
14	R	2	S	A	H	2	2	2	FALSE	68	NA	NA	-2.17123	1.20546	NA	NA	-2.17123	1.20546
14	R	2	T	A	H	2	2	2	FALSE	144.5	-0.343479	0.659704	-0.605011	0.706925	NA	NA	-0.465219	0.482311
14	R	2	V	A	H	2	2	2	FALSE	129.5	-2.43782	0.595602	-1.19286	1.00443	NA	NA	-2.11395	0.512306
14	R	3	*	E	H	2	2	2	TRUE	64	NA	NA	-4.61022	1.90742	NA	NA	-4.61022	1.90742
14	R	3	A	E	H	2	2	2	FALSE	62	-1.26516	0.898479	NA	NA	NA	NA	-1.26516	0.898479
14	R	3	D	E	H	2	2	2	FALSE	63.5	0.638745	0.91309	-2.39809	1.19929	NA	NA	-0.475638	0.726492
14	R	3	G	E	H	2	2	2	FALSE	112.5	0.500581	0.639849	0.405025	0.893161	NA	NA	0.468173	0.520149
14	R	3	V	E	H	2	2	2	FALSE	137	-2.4883	0.618628	-2.13508	0.775848	-2.29275	0.875578	-2.33739	0.423383
14	R	4	I	F	H	2	2	2	FALSE	150.667	-0.684669	0.508545	-2.03047	0.695181	-0.701365	1.02982	-1.09178	0.381278
14	R	4	L	F	H	2	2	2	FALSE	294.333	-0.798772	0.369672	-1.66629	0.513086	-1.59909	0.644133	-1.185	0.271901
14	R	4	S	F	H	2	2	2	FALSE	233	-0.495743	0.437662	-1.20398	0.553635	-0.86341	0.706059	-0.786345	0.308767
14	R	4	Y	F	H	2	2	2	FALSE	155.667	0.292139	0.660559	-2.05421	0.657009	-1.87031	0.73184	-1.17077	0.392972
14	R	5	*	R	H	2	2	2	TRUE	129	-3.63765	0.690398	-3.09544	1.29155	NA	NA	-3.51715	0.608866
14	R	5	L	R	H	2	2	2	FALSE	82.5	-2.12011	0.822792	-1.80876	1.06946	NA	NA	-2.00434	0.652127
14	R	5	P	R	H	2	2	2	FALSE	52	NA	NA	-3.70397	1.67262	NA	NA	-3.70397	1.67262
14	R	5	Q	R	H	2	2	2	FALSE	117	-0.274283	0.62696	-0.143487	0.88882	NA	NA	-0.230826	0.512326
14	R	6	L	H	H	2	2	2	FALSE	201.5	-2.31096	0.537248	-2.55419	0.727572	NA	NA	-2.39679	0.432191
14	R	6	N	H	H	2	2	2	FALSE	55.5	-1.2228	0.978329	-1.33104	1.2447	NA	NA	-1.26413	0.769172
14	R	6	P	H	H	2	2	2	FALSE	77	-1.65173	0.822208	NA	NA	NA	NA	-1.65173	0.822208
14	R	6	Q	H	H	2	2	2	FALSE	221.333	-0.745859	0.423715	-2.26898	0.574642	-0.468703	0.883242	-1.17675	0.31814
14	R	6	R	H	H	2	2	2	FALSE	144	-0.322079	0.486401	0.644417	0.744073	-1.04334	0.967531	-0.184749	0.37526
14	R	6	Y	H	H	2	2	2	FALSE	98.5	-2.50088	0.774209	-1.96557	0.997504	NA	NA	-2.29964	0.611607
14	R	7	E	D	H	2	2	2	FALSE	55	NA	NA	0.622757	1.25447	NA	NA	0.622757	1.25447
14	R	7	G	D	H	2	2	2	FALSE	94	0.35175	0.745393	-0.573074	0.927383	NA	NA	-0.0112232	0.580987
14	R	7	V	D	H	2	2	2	FALSE	157	NA	NA	-1.8802	0.781475	NA	NA	-1.8802	0.781475
14	R	7	Y	D	H	2	2	2	FALSE	85	-0.324177	0.877068	-1.47698	0.925336	NA	NA	-0.869729	0.636561
14	R	8	L	S	H	2	2	2	FALSE	70.5	-2.18939	0.822696	-2.41912	1.32882	NA	NA	-2.25305	0.699488
14	R	8	P	S	H	2	2	2	FALSE	99.5	-0.187368	0.725114	-0.311745	0.902643	NA	NA	-0.236151	0.565301
14	R	8	T	S	H	2	2	2	FALSE	115.333	0.577604	0.744168	-2.87778	0.784102	-1.26088	0.901089	-1.11295	0.46305
14	R	9	*	G	H	2	2	2	TRUE	139.333	-4.13012	0.823589	-3.88632	0.918799	NA	NA	-4.0215	0.613273
14	R	9	E	G	H	2	2	2	FALSE	58	NA	NA	-1.19534	1.25045	NA	NA	-1.19534	1.25045
14	R	9	R	G	H	2	2	2	FALSE	88	0.260203	0.958904	-0.582523	0.842342	NA	NA	-0.215467	0.632846
14	R	9	V	G	H	2	2	2	FALSE	82	-1.67828	0.798373	NA	NA	NA	NA	-1.67828	0.798373
14	R	10	*	Y	H	2	2	2	TRUE	113	-4.29264	1.25602	-3.48223	0.958084	NA	NA	-3.78033	0.761764
14	R	10	C	Y	H	2	2	2	FALSE	108	-0.0306324	0.752555	-0.963796	0.757346	-2.39412	0.907196	-0.982893	0.46008
14	R	10	F	Y	H	2	2	2	FALSE	77.6667	-0.902255	0.887857	-1.5652	0.877273	-1.34419	1.10307	-1.26352	0.543142
14	R	10	H	Y	H	2	2	2	FALSE	122	-0.968405	0.677737	-0.0584161	0.802772	NA	NA	-0.589718	0.517862
14	R	10	N	Y	H	2	2	2	FALSE	133.5	-0.455342	0.623907	-0.00876531	0.785387	NA	NA	-0.28256	0.488522
14	R	11	D	E	H	2	2	2	FALSE	250	0.376517	0.464154	-0.500194	0.513975	-0.16568	0.624747	-0.0518937	0.30166
14	R	11	G	E	H	2	2	2	FALSE	233.333	0.0172039	0.37619	0.156666	0.647462	0.788217	0.711092	0.179723	0.295795
14	R	11	K	E	H	2	2	2	FALSE	77.5	-0.273098	0.803385	-1.99681	1.09313	NA	NA	-0.877612	0.647358
14	R	11	V	E	H	2	2	2	FALSE	216.333	-0.841517	0.419146	-0.412281	0.639065	-1.06501	0.70351	-0.782524	0.313711
14	R	12	A	V	H	2	2	2	FALSE	109.333	0.339996	0.551799	1.13287	0.859664	1.19434	1.05614	0.672276	0.425093
14	R	12	D	V	H	2	2	2	FALSE	172.667	-0.0846717	0.453253	-0.179959	0.691686	-0.543943	0.827759	-0.187966	0.344679
14	R	12	I	V	H	2	2	2	FALSE	142	-0.81552	0.614549	-2.20919	0.806983	NA	NA	-1.32709	0.488918
14	R	13	L	H	H	2	2	2	FALSE	159	0.580164	0.602918	-2.79174	0.613837	-0.709272	1.074	-1.02491	0.399303
14	R	13	N	H	H	2	2	2	FALSE	66.5	1.45903	0.934969	-0.035077	1.0452	NA	NA	0.794893	0.696847
14	R	13	Q	H	H	2	2	2	FALSE	212.667	-1.01918	0.443573	-0.941255	0.576501	-1.69348	0.960117	-1.07334	0.33012
14	R	13	R	H	H	2	2	2	FALSE	145	-1.28209	0.507541	-0.198844	0.776015	0.498352	0.843586	-0.66309	0.379381
14	R	13	Y	H	H	2	2	2	FALSE	93.5	-0.645435	0.704903	-0.403736	0.995038	NA	NA	-0.564669	0.575195
14	Y	1	E	D	H	2	2	2	FALSE	101.5	-0.552469	0.796765	-1.78195	0.864248	NA	NA	-1.11734	0.585804
14	Y	1	G	D	H	2	2	2	FALSE	108	0.153547	0.755472	-1.13104	0.825665	NA	NA	-0.431832	0.557366
14	Y	1	N	D	H	2	2	2	FALSE	57	-0.657829	0.919869	NA	NA	NA	NA	-0.657829	0.919869
14	Y	1	V	D	H	2	2	2	FALSE	149	-1.87467	0.624533	-3.90656	1.00067	NA	NA	-2.44427	0.529813
14	Y	2	V	A	H	2	2	2	FALSE	62	NA	NA	-3.88093	1.59134	NA	NA	-3.88093	1.59134
14	Y	3	K	E	H	2	2	2	FALSE	51	-1.64522	1.0069	NA	NA	NA	NA	-1.64522	1.0069
14	Y	4	I	F	H	2	2	2	FALSE	81	-2.10784	0.826939	NA	NA	NA	NA	-2.10784	0.826939
14	Y	4	L	F	H	2	2	2	FALSE	52	NA	NA	-2.59869	1.42537	NA	NA	-2.59869	1.42537
14	Y	4	S	F	H	2	2	2	FALSE	73	NA	NA	-1.39017	1.12141	NA	NA	-1.39017	1.12141
14	Y	4	Y	F	H	2	2	2	FALSE	78	NA	NA	-1.84694	1.10514	NA	NA	-1.84694	1.10514
14	Y	5	L	R	H	2	2	2	FALSE	67	-2.61123	0.954936	NA	NA	NA	NA	-2.61123	0.954936
14	Y	5	Q	R	H	2	2	2	FALSE	94	-1.65531	0.792632	-3.01624	1.0515	NA	NA	-2.14843	0.632946
14	Y	6	L	H	H	2	2	2	FALSE	96	NA	NA	-2.92609	1.08721	NA	NA	-2.92609	1.08721
14	Y	6	Q	H	H	2	2	2	FALSE	92.5	-0.253279	0.768332	-1.58095	0.946504	NA	NA	-0.780641	0.59653
14	Y	6	R	H	H	2	2	2	FALSE	96	-0.965264	0.744805	-1.77311	0.958817	NA	NA	-1.26928	0.588193
14	Y	7	G	D	H	2	2	2	FALSE	52	NA	NA	-2.4436	1.40604	NA	NA	-2.4436	1.40604
14	Y	7	N	D	H	2	2	2	FALSE	58	-1.83099	0.955421	NA	NA	NA	NA	-1.83099	0.955421
14	Y	7	V	D	H	2	2	2	FALSE	56	-3.01968	1.10566	NA	NA	NA	NA	-3.01968	1.10566
14	Y	8	P	S	H	2	2	2	FALSE	77.5	-1.09078	0.773684	0.571115	1.09709	NA	NA	-0.538791	0.632274
14	Y	8	T	S	H	2	2	2	FALSE	84	-2.32653	0.828227	NA	NA	NA	NA	-2.32653	0.828227
14	Y	9	*	G	H	2	2	2	TRUE	64.5	-4.7469	1.6518	-3.5359	1.43727	NA	NA	-4.0577	1.08427
14	Y	10	*	Y	H	2	2	2	TRUE	147	NA	NA	-5.44682	1.69813	NA	NA	-5.44682	1.69813
14	Y	10	C	Y	H	2	2	2	FALSE	66	NA	NA	-0.789299	1.16177	NA	NA	-0.789299	1.16177
14	Y	10	F	Y	H	2	2	2	FALSE	57	-0.552469	0.917859	NA	NA	NA	NA	-0.552469	0.917859
14	Y	11	D	E	H	2	2	2	FALSE	83.5	-0.457158	0.795341	-0.147783	0.981262	NA	NA	-0.334496	0.617871
14	Y	11	G	E	H	2	2	2	FALSE	91.5	0.816666	0.806108	-0.207049	0.889393	NA	NA	0.354973	0.597284
14	Y	11	V	E	H	2	2	2	FALSE	94	NA	NA	-2.20755	1.02828	NA	NA	-2.20755	1.02828
14	Y	12	A	V	H	2	2	2	FALSE	73	NA	NA	-1.58807	1.12934	NA	NA	-1.58807	1.12934
14	Y	12	D	V	H	2	2	2	FALSE	78.5	-1.01992	0.726344	-0.0342654	1.17736	NA	NA	-0.748201	0.618171
14	Y	13	L	H	H	2	2	2	FALSE	64	-3.66403	1.17774	NA	NA	NA	NA	-3.66403	1.17774
14	Y	13	N	H	H	2	2	2	FALSE	68	0.717994	0.829498	NA	NA	NA	NA	0.717994	0.829498
14	Y	13	Q	H	H	2	2	2	FALSE	99.5	-1.02213	0.652893	-0.903871	1.04496	NA	NA	-0.988927	0.553702
14	Y	13	R	H	H	2	2	2	FALSE	78	0.0126515	0.735253	-0.864055	1.14624	NA	NA	-0.242918	0.618876
15	*	1	E	D	Q	2	2	2	TRUE	57	NA	NA	-2.40162	1.33852	NA	NA	-2.40162	1.33852
15	*	1	G	D	Q	2	2	2	TRUE	71.5	-2.22847	0.924104	-1.88835	1.11458	NA	NA	-2.08991	0.711393
15	*	1	N	D	Q	2	2	2	TRUE	77	-2.09184	0.942034	-3.01761	1.1233	NA	NA	-2.4741	0.721805
15	*	1	V	D	Q	2	2	2	TRUE	121	-3.83851	0.876817	NA	NA	NA	NA	-3.83851	0.876817
15	*	3	G	E	Q	2	2	2	TRUE	56	NA	NA	-3.77853	1.63712	NA	NA	-3.77853	1.63712
15	*	3	V	E	Q	2	2	2	TRUE	64	-2.97089	1.02691	NA	NA	NA	NA	-2.97089	1.02691
15	*	4	I	F	Q	2	2	2	TRUE	53	NA	NA	-3.72313	1.66332	NA	NA	-3.72313	1.66332
15	*	4	L	F	Q	2	2	2	TRUE	187	NA	NA	-4.2924	1.02123	NA	NA	-4.2924	1.02123
15	*	4	S	F	Q	2	2	2	TRUE	76.5	-3.50518	0.954131	-2.77565	1.32905	NA	NA	-3.25707	0.775079
15	*	4	Y	F	Q	2	2	2	TRUE	50	NA	NA	-2.96716	1.51293	NA	NA	-2.96716	1.51293
15	*	5	L	R	Q	2	2	2	TRUE	79	-4.28006	1.25888	NA	NA	NA	NA	-4.28006	1.25888
15	*	5	Q	R	Q	2	2	2	TRUE	59	-3.58269	1.20301	NA	NA	NA	NA	-3.58269	1.20301
15	*	6	L	H	Q	2	2	2	TRUE	68.5	-3.66403	1.17774	-4.7426	1.86373	NA	NA	-3.97183	0.995608
15	*	6	Q	H	Q	2	2	2	TRUE	59.5	-3.0167	1.01131	-2.78212	1.45199	NA	NA	-2.94007	0.829859
15	*	6	R	H	Q	2	2	2	TRUE	108	NA	NA	-2.82009	1.01271	NA	NA	-2.82009	1.01271
15	*	6	Y	H	Q	2	2	2	TRUE	71	NA	NA	-4.71465	1.87256	NA	NA	-4.71465	1.87256
15	*	8	T	S	Q	2	2	2	TRUE	67	NA	NA	-3.2616	1.36195	NA	NA	-3.2616	1.36195
15	*	9	*	G	Q	2	2	2	TRUE	54	-2.5133	1.05019	NA	NA	NA	NA	-2.5133	1.05019
15	*	10	C	Y	Q	2	2	2	TRUE	64	-3.15321	1.05879	NA	NA	NA	NA	-3.15321	1.05879
15	*	10	F	Y	Q	2	2	2	TRUE	79	NA	NA	-3.20286	1.24342	NA	NA	-3.20286	1.24342
15	*	10	H	Y	Q	2	2	2	TRUE	66	-3.40712	1.09512	NA	NA	NA	NA	-3.40712	1.09512
15	*	10	N	Y	Q	2	2	2	TRUE	62	-3.42216	1.09042	-2.53597	1.35376	NA	NA	-3.07345	0.849201
15	*	11	D	E	Q	2	2	2	TRUE	52	-2.25242	1.04182	NA	NA	NA	NA	-2.25242	1.04182
15	*	11	G	E	Q	2	2	2	TRUE	120.5	-3.02095	0.666267	-2.38382	1.10161	NA	NA	-2.85031	0.570106
15	*	11	V	E	Q	2	2	2	TRUE	112	-1.98221	0.657361	-2.44806	1.03071	NA	NA	-2.11691	0.554235
15	*	13	L	H	Q	2	2	2	TRUE	152	-4.9345	1.1439	NA	NA	NA	NA	-4.9345	1.1439
15	*	13	Q	H	Q	2	2	2	TRUE	75	NA	NA	-4.07244	1.51434	NA	NA	-4.07244	1.51434
15	*	13	R	H	Q	2	2	2	TRUE	63	NA	NA	-2.97517	1.34947	NA	NA	-2.97517	1.34947
15	*	14	Q	H	Q	2	2	2	TRUE	157.5	-1.6968	0.54688	-3.56594	1.00783	NA	NA	-2.12198	0.480673
15	E	1	E	D	Q	2	2	2	FALSE	64	NA	NA	-1.25779	1.19261	NA	NA	-1.25779	1.19261
15	E	1	V	D	Q	2	2	2	FALSE	86	-2.35006	0.820596	NA	NA	NA	NA	-2.35006	0.820596
15	E	4	S	F	Q	2	2	2	FALSE	55	-2.53165	1.04288	NA	NA	NA	NA	-2.53165	1.04288
15	E	12	D	V	Q	2	2	2	FALSE	62	-1.77875	0.880483	-0.623999	1.25743	NA	NA	-1.39884	0.721245
15	E	13	R	H	Q	2	2	2	FALSE	64	-0.355926	0.863911	NA	NA	NA	NA	-0.355926	0.863911
15	E	14	L	H	Q	2	2	2	FALSE	50	-0.438247	0.977059	NA	NA	NA	NA	-0.438247	0.977059
15	E	14	Q	H	Q	2	2	2	FALSE	70	-2.07967	0.88648	NA	NA	NA	NA	-2.07967	0.88648
15	H	1	A	D	Q	2	2	2	FALSE	65	NA	NA	-0.204697	1.16106	NA	NA	-0.204697	1.16106
15	H	1	E	D	Q	2	2	2	FALSE	444	0.125077	0.278444	0.482942	0.471902	0.482955	0.558183	0.258858	0.220336
15	H	1	G	D	Q	2	2	2	FALSE	321	1.39858	0.440537	0.432492	0.446185	0.0700745	0.545668	0.710364	0.271821
15	H	1	N	D	Q	2	2	2	FALSE	208.333	NA	NA	0.686886	0.549391	NA	NA	0.686886	0.549391
15	H	1	V	D	Q	2	2	2	FALSE	424	NA	NA	-1.26622	0.4008	NA	NA	-1.26622	0.4008
15	H	1	Y	D	Q	2	2	2	FALSE	118.5	0.694811	0.609289	0.712474	0.891799	NA	NA	0.700432	0.503084
15	H	2	E	A	Q	2	2	2	FALSE	134	-0.327009	0.593477	-0.351537	0.823505	NA	NA	-0.335393	0.481473
15	H	2	P	A	Q	2	2	2	FALSE	105.5	0.84012	0.696633	-0.0913689	0.876666	NA	NA	0.479588	0.545402
15	H	2	S	A	Q	2	2	2	FALSE	100.667	0.646867	0.596109	-0.282809	0.94706	-0.426104	0.936682	0.201114	0.444166
15	H	2	T	A	Q	2	2	2	FALSE	157.667	-0.068109	0.441831	NA	NA	NA	NA	-0.068109	0.441831
15	H	2	V	A	Q	2	2	2	FALSE	156.333	0.180431	0.469354	NA	NA	NA	NA	0.180431	0.469354
15	H	3	*	E	Q	2	2	2	TRUE	103	-3.83061	0.878435	-3.44001	1.14836	-2.98559	0.94334	-3.43861	0.560951
15	H	3	D	E	Q	2	2	2	FALSE	83	0.352623	0.73285	-0.19645	1.06011	NA	NA	0.175074	0.602829
15	H	3	G	E	Q	2	2	2	FALSE	120	1.28172	0.594426	1.19035	0.769934	-0.0382331	0.881023	0.962249	0.415036
15	H	3	K	E	Q	2	2	2	FALSE	124	0.907599	0.560194	0.977251	0.773052	0.0298872	0.906131	0.750893	0.405626
15	H	3	Q	E	Q	2	2	2	FALSE	68	1.91751	0.925458	NA	NA	-1.43625	0.884237	0.16428	0.639326
15	H	3	V	E	Q	2	2	2	FALSE	214	-0.223706	0.513425	-0.806347	0.598269	-0.643996	0.602947	-0.52183	0.327243
15	H	4	I	F	Q	2	2	2	FALSE	255	-0.297261	0.393114	0.093045	0.616447	-0.697909	0.60319	-0.303511	0.290486
15	H	4	L	F	Q	2	2	2	FALSE	350.667	-0.752676	0.314089	NA	NA	NA	NA	-0.752676	0.314089
15	H	4	S	F	Q	2	2	2	FALSE	269.667	NA	NA	-0.388457	0.510387	NA	NA	-0.388457	0.510387
15	H	4	Y	F	Q	2	2	2	FALSE	255.333	0.264853	0.404585	0.202937	0.543991	-0.130643	0.654152	0.169002	0.2908
15	H	5	*	R	Q	2	2	2	TRUE	159.5	-2.79568	0.590491	-3.01432	0.941553	NA	NA	-2.8574	0.500252
15	H	5	G	R	Q	2	2	2	FALSE	87	-0.304017	0.683744	NA	NA	-1.80972	0.950903	-0.817186	0.555132
15	H	5	L	R	Q	2	2	2	FALSE	236.667	-1.25319	0.386724	-0.991461	0.649861	-1.10282	0.705898	-1.16988	0.300676
15	H	5	P	R	Q	2	2	2	FALSE	68	NA	NA	-2.25876	1.21266	NA	NA	-2.25876	1.21266
15	H	5	Q	R	Q	2	2	2	FALSE	153.667	0.679963	0.548849	-0.0400399	0.687073	-0.443111	0.753304	0.193269	0.372672
15	H	6	D	H	Q	2	2	2	FALSE	66	NA	NA	-2.22873	1.22828	NA	NA	-2.22873	1.22828
15	H	6	L	H	Q	2	2	2	FALSE	271.333	-0.958206	0.370703	-0.77813	0.519408	NA	NA	-0.897435	0.301736
15	H	6	N	H	Q	2	2	2	FALSE	62	-0.501483	0.859533	0.20063	1.21425	NA	NA	-0.267108	0.701553
15	H	6	Q	H	Q	2	2	2	FALSE	284.667	-0.371741	0.402134	-0.278873	0.455249	0.320208	0.761704	-0.24288	0.280249
15	H	6	R	H	Q	2	2	2	FALSE	246.667	0.365952	0.377393	NA	NA	NA	NA	0.365952	0.377393
15	H	6	Y	H	Q	2	2	2	FALSE	90	-0.0836339	0.669136	1.12173	1.08731	NA	NA	0.247468	0.56987
15	H	7	A	D	Q	2	2	2	FALSE	63	0.592489	0.848744	0.505606	1.19202	NA	NA	0.56326	0.691391
15	H	7	E	D	Q	2	2	2	FALSE	126	-0.237658	0.710542	0.248211	0.745445	NA	NA	-0.00636402	0.514325
15	H	7	G	D	Q	2	2	2	FALSE	115	1.19711	0.717603	0.733201	0.790169	NA	NA	0.987433	0.531228
15	H	7	N	D	Q	2	2	2	FALSE	130	0.679043	0.51996	0.492999	0.771981	1.05354	0.956507	0.694058	0.393147
15	H	7	V	D	Q	2	2	2	FALSE	135	0.546309	0.68421	-0.354521	0.638609	-0.962012	0.85542	-0.170792	0.409796
15	H	7	Y	D	Q	2	2	2	FALSE	151.5	0.0662777	0.497805	1.25209	0.902665	NA	NA	0.342819	0.435912
15	H	8	L	S	Q	2	2	2	FALSE	110.5	-0.248211	0.733665	-1.65274	0.84303	NA	NA	-0.853518	0.553434
15	H	8	P	S	Q	2	2	2	FALSE	87	NA	NA	-0.869325	1.01389	NA	NA	-0.869325	1.01389
15	H	8	T	S	Q	2	2	2	FALSE	132.5	-1.35006	0.512091	NA	NA	NA	NA	-1.35006	0.512091
15	H	9	*	G	Q	2	2	2	TRUE	229.667	-2.8571	0.454654	NA	NA	NA	NA	-2.8571	0.454654
15	H	9	E	G	Q	2	2	2	FALSE	148	-1.53855	0.52581	-0.485292	0.917395	NA	NA	-1.2781	0.456191
15	H	9	R	G	Q	2	2	2	FALSE	66.5	0.243536	0.844659	NA	NA	0.0359182	0.95271	0.152163	0.632028
15	H	9	V	G	Q	2	2	2	FALSE	123	0.469416	0.572609	0.561634	0.808318	-1.01819	0.84351	0.143709	0.40873
15	H	10	*	Y	Q	2	2	2	TRUE	208	-3.9196	0.585924	-3.90837	0.845953	-3.56648	0.933273	-3.84245	0.428027
15	H	10	C	Y	Q	2	2	2	FALSE	133.333	0.168973	0.535069	0.858615	0.786973	-0.415903	0.834779	0.210888	0.390955
15	H	10	D	Y	Q	2	2	2	FALSE	79	NA	NA	-3.71679	1.36106	NA	NA	-3.71679	1.36106
15	H	10	F	Y	Q	2	2	2	FALSE	148.667	0.378183	0.467075	0.532514	0.711502	0.812181	1.08541	0.469064	0.367409
15	H	10	H	Y	Q	2	2	2	FALSE	146	0.45053	0.510795	NA	NA	NA	NA	0.45053	0.510795
15	H	10	N	Y	Q	2	2	2	FALSE	145.333	1.1048	0.629974	0.0744657	0.667134	0.386234	0.740049	0.554622	0.389471
15	H	11	*	E	Q	2	2	2	TRUE	68	-2.75843	0.959142	-2.56425	1.25206	NA	NA	-2.68662	0.761408
15	H	11	A	E	Q	2	2	2	FALSE	175	NA	NA	-4.00302	0.975785	NA	NA	-4.00302	0.975785
15	H	11	D	E	Q	2	2	2	FALSE	410.333	NA	NA	-0.253302	0.420015	NA	NA	-0.253302	0.420015
15	H	11	G	E	Q	2	2	2	FALSE	336	0.570696	0.337883	NA	NA	NA	NA	0.570696	0.337883
15	H	11	K	E	Q	2	2	2	FALSE	112.5	-0.170645	0.669888	-0.344255	0.864065	NA	NA	-0.23582	0.529419
15	H	11	Q	E	Q	2	2	2	FALSE	58	NA	NA	-2.41912	1.32882	NA	NA	-2.41912	1.32882
15	H	11	V	E	Q	2	2	2	FALSE	286	NA	NA	NA	NA	-0.752942	0.521288	-0.752942	0.521288
15	H	12	A	V	Q	2	2	2	FALSE	215	-0.480318	0.429229	-0.134832	0.567661	0.153122	0.809866	-0.277655	0.31535
15	H	12	D	V	Q	2	2	2	FALSE	255	NA	NA	-0.903756	0.549158	NA	NA	-0.903756	0.549158
15	H	12	F	V	Q	2	2	2	FALSE	90.5	-1.52772	0.630252	0.281271	1.31804	NA	NA	-1.19106	0.568591
15	H	12	I	V	Q	2	2	2	FALSE	162	0.239904	0.496975	0.254432	0.643975	-0.352523	0.892414	0.148035	0.360005
15	H	12	L	V	Q	2	2	2	FALSE	75	NA	NA	-2.65053	1.20944	-2.25162	0.931684	-2.40018	0.738077
15	H	13	L	H	Q	2	2	2	FALSE	198.667	-1.35197	0.483368	-1.75855	0.581158	-1.96882	0.860564	-1.58905	0.341173
15	H	13	N	H	Q	2	2	2	FALSE	131	0.551307	0.600818	0.0659262	0.820113	NA	NA	0.381784	0.484671
15	H	13	Q	H	Q	2	2	2	FALSE	297.667	-1.01284	0.349986	-0.985703	0.595135	-2.15327	0.629476	-1.22019	0.272054
15	H	13	R	H	Q	2	2	2	FALSE	269.667	-0.32858	0.39722	-0.697174	0.524782	-0.982416	0.662966	-0.559386	0.285783
15	H	13	Y	H	Q	2	2	2	FALSE	65	-1.02302	0.822213	-0.69341	1.21627	-1.65719	1.0066	-1.1513	0.564141
15	H	14	L	H	Q	2	2	2	FALSE	229.333	0.177091	0.452885	-0.910159	0.513812	-0.129268	0.784006	-0.27156	0.311735
15	H	14	N	H	Q	2	2	2	FALSE	96.5	-0.296737	0.615179	-0.121306	1.16009	NA	NA	-0.258233	0.543492
15	H	14	Q	H	Q	2	2	2	FALSE	240.333	0.300517	0.429568	-1.1199	0.567641	-1.21466	0.650927	-0.433141	0.30313
15	H	14	R	H	Q	2	2	2	FALSE	183.667	-0.547768	0.509658	-0.337003	0.639938	-1.42794	0.697302	-0.702952	0.346098
15	H	14	Y	H	Q	2	2	2	FALSE	142.5	0.62185	0.609553	-0.16263	0.748237	NA	NA	0.308909	0.472585
15	K	1	E	D	Q	2	2	2	FALSE	141.5	-0.52507	0.53711	-1.16004	0.900024	NA	NA	-0.69182	0.461223
15	K	1	G	D	Q	2	2	2	FALSE	192.5	-0.821628	0.515285	-0.441612	0.672382	NA	NA	-0.681022	0.408994
15	K	1	N	D	Q	2	2	2	FALSE	94.5	-1.65358	0.807003	-1.59815	0.925254	NA	NA	-1.62964	0.608176
15	K	1	V	D	Q	2	2	2	FALSE	196	-4.04844	0.765636	-3.68443	0.842808	NA	NA	-3.88386	0.56671
15	K	2	S	A	Q	2	2	2	FALSE	69.5	-0.802891	0.822758	-0.895952	1.15548	NA	NA	-0.8342	0.670214
15	K	2	T	A	Q	2	2	2	FALSE	76	NA	NA	-1.5447	1.10506	NA	NA	-1.5447	1.10506
15	K	2	V	A	Q	2	2	2	FALSE	72	-2.80099	0.944728	NA	NA	NA	NA	-2.80099	0.944728
15	K	3	G	E	Q	2	2	2	FALSE	68	0.0691826	0.794633	-1.36458	1.22545	NA	NA	-0.355224	0.66673
15	K	3	V	E	Q	2	2	2	FALSE	91	-3.1005	0.911925	-2.71201	1.05612	NA	NA	-2.93457	0.690223
15	K	4	I	F	Q	2	2	2	FALSE	90.5	-1.48148	0.759262	-0.980939	0.988366	NA	NA	-1.29572	0.602109
15	K	4	L	F	Q	2	2	2	FALSE	98	-1.94978	0.859929	-2.61241	0.929157	NA	NA	-2.2555	0.631118
15	K	4	S	F	Q	2	2	2	FALSE	128	-0.655055	0.698133	-1.45682	0.770144	NA	NA	-1.01671	0.517244
15	K	4	Y	F	Q	2	2	2	FALSE	91.5	-1.12829	0.714186	-2.48326	1.10407	NA	NA	-1.528	0.599663
15	K	5	*	R	Q	2	2	2	TRUE	76	-4.20107	1.27752	-3.42736	1.2888	NA	NA	-3.81762	0.907303
15	K	5	L	R	Q	2	2	2	FALSE	111	-3.927	0.959242	-2.1503	0.94301	NA	NA	-3.02349	0.672474
15	K	5	Q	R	Q	2	2	2	FALSE	114	NA	NA	-1.55821	0.903437	NA	NA	-1.55821	0.903437
15	K	6	L	H	Q	2	2	2	FALSE	170.5	-3.43108	0.693083	-3.64711	0.910696	NA	NA	-3.51031	0.551528
15	K	6	Q	H	Q	2	2	2	FALSE	161.5	-1.25329	0.570729	-1.96384	0.763472	NA	NA	-1.50801	0.457121
15	K	6	R	H	Q	2	2	2	FALSE	165	-1.04256	0.526482	-0.412499	0.775293	NA	NA	-0.843712	0.435549
15	K	7	G	D	Q	2	2	2	FALSE	73	-1.18065	0.826518	NA	NA	NA	NA	-1.18065	0.826518
15	K	8	T	S	Q	2	2	2	FALSE	65	0.330547	0.84402	-1.64791	1.2088	NA	NA	-0.317874	0.692024
15	K	9	*	G	Q	2	2	2	TRUE	100.5	-4.52574	1.20809	NA	NA	NA	NA	-4.52574	1.20809
15	K	10	*	Y	Q	2	2	2	TRUE	122	-4.99821	1.1358	-2.35957	1.11283	NA	NA	-3.65194	0.794887
15	K	10	C	Y	Q	2	2	2	FALSE	69.5	0.191168	0.820987	-2.72818	1.25367	NA	NA	-0.685033	0.686821
15	K	10	F	Y	Q	2	2	2	FALSE	56	-2.43189	1.02232	NA	NA	NA	NA	-2.43189	1.02232
15	K	10	N	Y	Q	2	2	2	FALSE	105.5	-1.3565	0.650016	-0.233393	0.987548	NA	NA	-1.01701	0.542956
15	K	11	D	E	Q	2	2	2	FALSE	92.5	0.0812881	0.872432	-1.84565	0.880789	NA	NA	-0.872994	0.619836
15	K	11	G	E	Q	2	2	2	FALSE	124.5	-0.0298032	0.731562	-1.36379	0.758192	NA	NA	-0.672959	0.526455
15	K	11	V	E	Q	2	2	2	FALSE	102	-2.12982	0.89642	-2.25134	0.861296	NA	NA	-2.19301	0.621074
15	K	12	A	V	Q	2	2	2	FALSE	61.5	0.377067	0.957955	-0.283057	1.10429	NA	NA	0.0936115	0.723622
15	K	12	D	V	Q	2	2	2	FALSE	187	NA	NA	-1.47387	0.704281	NA	NA	-1.47387	0.704281
15	K	12	I	V	Q	2	2	2	FALSE	51	-1.763	1.01376	NA	NA	NA	NA	-1.763	1.01376
15	K	13	L	H	Q	2	2	2	FALSE	128	-4.13012	0.823589	-2.18299	1.07311	NA	NA	-3.40836	0.65335
15	K	13	Q	H	Q	2	2	2	FALSE	59	-2.14421	0.994843	-1.33987	1.21462	NA	NA	-1.82126	0.769635
15	K	13	R	H	Q	2	2	2	FALSE	66	-2.697	0.925286	-2.57066	1.33484	NA	NA	-2.65599	0.760452
15	K	14	L	H	Q	2	2	2	FALSE	97	-2.14421	0.814734	-0.824916	0.901347	NA	NA	-1.55098	0.604411
15	K	14	Q	H	Q	2	2	2	FALSE	93	0.396248	0.813844	-2.41041	0.944029	NA	NA	-0.80036	0.616405
15	K	14	R	H	Q	2	2	2	FALSE	59	NA	NA	-2.21182	1.29743	NA	NA	-2.21182	1.29743
15	K	14	Y	H	Q	2	2	2	FALSE	52	-3.16871	1.17672	NA	NA	NA	NA	-3.16871	1.17672
15	L	1	E	D	Q	2	2	2	FALSE	296.333	-0.607089	0.348279	-0.427622	0.510131	-0.276045	0.742033	-0.514241	0.268192
15	L	1	G	D	Q	2	2	2	FALSE	246	0.478695	0.399709	0.368148	0.490248	1.40782	0.997966	0.520096	0.295865
15	L	1	N	D	Q	2	2	2	FALSE	157.333	-0.102718	0.467307	0.247525	0.673104	0.173811	1.05872	0.0300866	0.360877
15	L	1	V	D	Q	2	2	2	FALSE	395.667	-2.52963	0.362836	-2.72474	0.468591	-1.13353	0.62073	-2.34416	0.260418
15	L	1	Y	D	Q	2	2	2	FALSE	135	-1.86144	0.725449	-2.12633	0.766193	NA	NA	-1.98665	0.526785
15	L	2	E	A	Q	2	2	2	FALSE	158.5	-1.04441	0.519769	1.09316	0.819012	NA	NA	-0.43068	0.438854
15	L	2	G	A	Q	2	2	2	FALSE	90	0.0893853	0.726613	NA	NA	NA	NA	0.0893853	0.726613
15	L	2	P	A	Q	2	2	2	FALSE	96.5	-0.296608	0.734196	-1.16291	0.933913	NA	NA	-0.627504	0.57719
15	L	2	S	A	Q	2	2	2	FALSE	111.333	-0.296806	0.541162	-0.15251	0.884941	-0.352271	1.04378	-0.273034	0.422221
15	L	2	T	A	Q	2	2	2	FALSE	146.667	-0.311797	0.461932	0.254237	0.765303	0.51095	1.015	-0.0721279	0.368492
15	L	2	V	A	Q	2	2	2	FALSE	177.333	-0.859382	0.43872	-1.74928	0.70642	-1.94735	0.926379	-1.22413	0.345762
15	L	3	*	E	Q	2	2	2	TRUE	86.6667	-2.88387	0.86605	-4.12046	1.22256	-0.0931636	1.05096	-2.29946	0.586445
15	L	3	D	E	Q	2	2	2	FALSE	129.5	NA	NA	-1.77335	0.689317	NA	NA	-1.77335	0.689317
15	L	3	G	E	Q	2	2	2	FALSE	127	0.206218	0.638705	-0.918228	0.80962	NA	NA	-0.225133	0.50145
15	L	3	K	E	Q	2	2	2	FALSE	59.6667	1.13883	0.840111	0.204164	1.18456	-0.670813	1.08322	0.398207	0.579112
15	L	3	V	E	Q	2	2	2	FALSE	185.333	-2.09891	0.505604	-1.82554	0.669865	-2.8635	0.795578	-2.17647	0.359901
15	L	4	C	F	Q	2	2	2	FALSE	54	-0.373238	0.939598	NA	NA	NA	NA	-0.373238	0.939598
15	L	4	I	F	Q	2	2	2	FALSE	159.667	-1.19958	0.479595	-0.129963	0.68582	0.352794	0.951583	-0.673263	0.363263
15	L	4	L	F	Q	2	2	2	FALSE	398	-1.21823	0.295001	-0.142916	0.450072	-0.828962	0.643131	-0.886599	0.230356
15	L	4	S	F	Q	2	2	2	FALSE	284.667	-0.0661788	0.378963	0.018206	0.51335	-0.625689	0.654518	-0.14148	0.276373
15	L	4	Y	F	Q	2	2	2	FALSE	189.333	1.14284	0.561431	-1.63476	0.606427	-0.590694	0.660633	-0.265549	0.349577
15	L	5	*	R	Q	2	2	2	TRUE	129.667	-2.85505	0.704375	-2.96211	0.75976	-2.38641	1.0742	-2.80723	0.465517
15	L	5	G	R	Q	2	2	2	FALSE	111	-2.48008	0.733973	NA	NA	NA	NA	-2.48008	0.733973
15	L	5	L	R	Q	2	2	2	FALSE	153.333	-2.44133	0.548075	-2.34971	0.708337	-1.08561	1.04283	-2.21234	0.400267
15	L	5	Q	R	Q	2	2	2	FALSE	178	-1.51815	0.452106	-1.35309	0.685311	-1.26025	0.911481	-1.43768	0.348678
15	L	6	L	H	Q	2	2	2	FALSE	222.333	-1.9105	0.424436	-2.92243	0.644001	-2.53882	0.939794	-2.25701	0.331598
15	L	6	N	H	Q	2	2	2	FALSE	63	-0.328056	0.870241	NA	NA	NA	NA	-0.328056	0.870241
15	L	6	P	H	Q	2	2	2	FALSE	108	-3.49413	0.874788	NA	NA	NA	NA	-3.49413	0.874788
15	L	6	Q	H	Q	2	2	2	FALSE	254	0.258115	0.395149	-0.270892	0.487193	1.69664	0.943156	0.206028	0.291834
15	L	6	R	H	Q	2	2	2	FALSE	253.333	0.129952	0.399655	-0.119444	0.494727	0.904683	0.860047	0.132382	0.292372
15	L	6	Y	H	Q	2	2	2	FALSE	153.5	-1.82652	0.526334	-1.95776	0.936548	NA	NA	-1.85802	0.458839
15	L	7	E	D	Q	2	2	2	FALSE	155	NA	NA	-1.77257	0.790881	NA	NA	-1.77257	0.790881
15	L	7	G	D	Q	2	2	2	FALSE	164.5	1.23035	0.601067	0.390887	0.664029	NA	NA	0.852291	0.44562
15	L	7	N	D	Q	2	2	2	FALSE	103	0.349668	0.654432	1.06691	0.953747	NA	NA	0.579265	0.539614
15	L	7	V	D	Q	2	2	2	FALSE	109	0.192728	0.621037	-0.412856	0.765024	-0.00277341	1.06879	-0.040208	0.43951
15	L	7	Y	D	Q	2	2	2	FALSE	78	-0.506123	0.785979	NA	NA	NA	NA	-0.506123	0.785979
15	L	8	L	S	Q	2	2	2	FALSE	83	-1.86272	0.812239	-0.82812	1.02488	NA	NA	-1.46359	0.636569
15	L	8	P	S	Q	2	2	2	FALSE	139.667	0.15087	0.488059	0.75921	0.7533	-0.24588	0.995188	0.247202	0.378776
15	L	8	T	S	Q	2	2	2	FALSE	135.333	-0.515469	0.504342	0.368384	0.767316	-0.167104	0.980373	-0.236077	0.387193
15	L	9	*	G	Q	2	2	2	TRUE	250.333	-3.65224	0.598191	-4.95322	0.903263	-3.70179	0.818893	-3.95496	0.425956
15	L	9	E	G	Q	2	2	2	FALSE	67	-0.694146	0.774562	-0.160678	1.28489	NA	NA	-0.551957	0.663354
15	L	9	R	G	Q	2	2	2	FALSE	111.5	0.93963	0.568037	0.696239	1.05358	NA	NA	0.884815	0.499997
15	L	9	V	G	Q	2	2	2	FALSE	66	0.794557	0.867678	0.928294	1.11097	NA	NA	0.845226	0.683831
15	L	10	*	Y	Q	2	2	2	TRUE	155.333	-3.55867	0.669442	-4.05439	0.879672	-2.87851	1.14693	-3.58751	0.48315
15	L	10	C	Y	Q	2	2	2	FALSE	191.333	-0.477809	0.412731	-0.549212	0.682064	-0.242904	0.8589	-0.460217	0.32659
15	L	10	F	Y	Q	2	2	2	FALSE	166	-0.237186	0.494891	-0.426094	0.609336	0.236079	1.01588	-0.243668	0.359319
15	L	10	H	Y	Q	2	2	2	FALSE	130.667	-0.473028	0.524981	-0.549441	0.825668	-0.47386	0.869154	-0.490661	0.3947
15	L	10	N	Y	Q	2	2	2	FALSE	162	0.42087	0.491528	-1.43147	0.712782	-0.581931	0.792658	-0.26	0.3604
15	L	11	*	E	Q	2	2	2	TRUE	65	NA	NA	-2.6681	1.28374	NA	NA	-2.6681	1.28374
15	L	11	D	E	Q	2	2	2	FALSE	271.667	-0.423566	0.402467	0.466774	0.514841	-0.252392	0.645499	-0.118227	0.284598
15	L	11	G	E	Q	2	2	2	FALSE	224.333	-0.821365	0.474283	-1.48665	0.593939	-1.56689	0.635062	-1.204	0.320095
15	L	11	K	E	Q	2	2	2	FALSE	79	-0.776605	0.878024	-0.191061	0.960885	NA	NA	-0.510164	0.648175
15	L	11	V	E	Q	2	2	2	FALSE	258.333	-1.13878	0.454502	-2.13454	0.513787	-1.64367	0.69449	-1.58905	0.305674
15	L	12	A	V	Q	2	2	2	FALSE	131	-0.859931	0.532219	0.168472	0.792654	-2.43957	0.940099	-0.884005	0.399889
15	L	12	D	V	Q	2	2	2	FALSE	203.667	-0.678663	0.507227	-0.751121	0.525266	-0.523171	0.835418	-0.683116	0.334373
15	L	12	F	V	Q	2	2	2	FALSE	71	-0.534769	0.925582	0.0641589	1.00737	NA	NA	-0.260601	0.681567
15	L	12	I	V	Q	2	2	2	FALSE	100.5	-0.0611875	0.716284	0.173507	0.898609	NA	NA	0.0299958	0.560114
15	L	13	L	H	Q	2	2	2	FALSE	206.333	-4.10698	0.620983	-3.22334	0.692058	-2.85416	1.0649	-3.57674	0.423981
15	L	13	N	H	Q	2	2	2	FALSE	109	0.533465	0.61222	-0.24451	0.982246	NA	NA	0.315795	0.519561
15	L	13	Q	H	Q	2	2	2	FALSE	203.333	-2.71969	0.46249	-1.37307	0.643247	-2.04802	0.90867	-2.22975	0.347041
15	L	13	R	H	Q	2	2	2	FALSE	190.667	-2.25948	0.541123	-3.27651	0.701726	-2.88991	0.802849	-2.69442	0.378036
15	L	13	Y	H	Q	2	2	2	FALSE	151.5	-2.36531	0.601665	-1.6137	0.817429	NA	NA	-2.1012	0.484558
15	L	14	L	H	Q	2	2	2	FALSE	182	-2.62732	0.599889	-3.82075	0.725614	-3.48511	1.0114	-3.17636	0.420492
15	L	14	N	H	Q	2	2	2	FALSE	119	0.576798	0.626564	-0.104926	0.86552	NA	NA	0.342384	0.507534
15	L	14	Q	H	Q	2	2	2	FALSE	104.333	-0.856464	0.691442	-1.43901	0.769677	-1.69939	1.07317	-1.2255	0.46384
15	L	14	R	H	Q	2	2	2	FALSE	206	-3.41144	0.591894	-4.51465	0.870242	-4.31159	1.08174	-3.85403	0.445904
15	L	14	Y	H	Q	2	2	2	FALSE	111.5	-2.6231	0.739675	-2.74266	0.995129	NA	NA	-2.66565	0.593645
15	P	1	E	D	Q	2	2	2	FALSE	56	1.6817	0.934458	1.88191	1.20725	NA	NA	1.75671	0.738953
15	P	1	G	D	Q	2	2	2	FALSE	51	1.98797	0.951807	NA	NA	NA	NA	1.98797	0.951807
15	P	1	V	D	Q	2	2	2	FALSE	68	0.423391	0.898767	-0.609523	0.960987	-0.661793	1.09303	-0.218444	0.562739
15	P	1	Y	D	Q	2	2	2	FALSE	64	NA	NA	1.33918	1.16037	NA	NA	1.33918	1.16037
15	P	2	T	A	Q	2	2	2	FALSE	50	0.508096	0.966413	NA	NA	NA	NA	0.508096	0.966413
15	P	2	V	A	Q	2	2	2	FALSE	52	-0.0117108	0.952416	NA	NA	NA	NA	-0.0117108	0.952416
15	P	4	L	F	Q	2	2	2	FALSE	64	NA	NA	0.0815245	1.16702	NA	NA	0.0815245	1.16702
15	P	6	L	H	Q	2	2	2	FALSE	103	-1.09536	0.696291	NA	NA	NA	NA	-1.09536	0.696291
15	P	6	Q	H	Q	2	2	2	FALSE	100	1.1963	0.685336	NA	NA	NA	NA	1.1963	0.685336
15	P	6	R	H	Q	2	2	2	FALSE	67.5	NA	NA	0.586123	1.02198	0.715451	1.06627	0.648045	0.737811
15	P	8	*	S	Q	2	2	2	TRUE	59	-3.98815	1.33408	NA	NA	NA	NA	-3.98815	1.33408
15	P	8	P	S	Q	2	2	2	FALSE	95	1.56017	0.701939	NA	NA	NA	NA	1.56017	0.701939
15	P	8	T	S	Q	2	2	2	FALSE	64	-0.66092	0.820034	1.46807	1.23993	NA	NA	-0.0130811	0.683982
15	P	10	*	Y	Q	2	2	2	TRUE	60	-4.69811	1.66268	NA	NA	NA	NA	-4.69811	1.66268
15	P	10	F	Y	Q	2	2	2	FALSE	71	0.52263	0.81309	NA	NA	NA	NA	0.52263	0.81309
15	P	11	D	E	Q	2	2	2	FALSE	65.5	1.12346	0.852967	1.1991	1.13456	NA	NA	1.15077	0.681784
15	P	11	G	E	Q	2	2	2	FALSE	85.5	1.90176	0.94287	1.11216	0.852497	NA	NA	1.46732	0.632349
15	P	11	V	E	Q	2	2	2	FALSE	74	0.958641	0.794801	NA	NA	NA	NA	0.958641	0.794801
15	P	12	A	V	Q	2	2	2	FALSE	70	NA	NA	0.484195	1.1131	NA	NA	0.484195	1.1131
15	P	12	D	V	Q	2	2	2	FALSE	62	0.144301	0.871864	NA	NA	NA	NA	0.144301	0.871864
15	P	12	I	V	Q	2	2	2	FALSE	66	NA	NA	0.53756	1.14591	NA	NA	0.53756	1.14591
15	P	13	L	H	Q	2	2	2	FALSE	70	0.967757	0.738367	1.42207	1.26275	NA	NA	1.08351	0.637398
15	P	13	Q	H	Q	2	2	2	FALSE	100	NA	NA	-1.8208	0.975218	NA	NA	-1.8208	0.975218
15	P	13	Y	H	Q	2	2	2	FALSE	59	NA	NA	-1.25051	1.24173	NA	NA	-1.25051	1.24173
15	P	14	R	H	Q	2	2	2	FALSE	56	-0.940234	0.93452	NA	NA	NA	NA	-0.940234	0.93452
15	R	1	E	D	Q	2	2	2	FALSE	309	-2.96876	0.415722	-2.02739	0.541919	-2.48204	0.646773	-2.59153	0.29384
15	R	1	G	D	Q	2	2	2	FALSE	235	-1.52156	0.404249	-0.353745	0.623154	-1.25246	0.695331	-1.19042	0.304816
15	R	1	N	D	Q	2	2	2	FALSE	133.333	-2.10425	0.635014	-1.43901	0.667271	-2.16961	1.09963	-1.84492	0.424368
15	R	1	V	D	Q	2	2	2	FALSE	298	-3.98946	0.532697	-4.45775	0.803732	-4.14739	0.787676	-4.136	0.386801
15	R	1	Y	D	Q	2	2	2	FALSE	89	-2.97089	0.840838	-2.90184	1.17268	NA	NA	-2.94744	0.683332
15	R	2	E	A	Q	2	2	2	FALSE	89	-3.05005	0.742397	-3.05693	1.19578	-4.50241	1.42805	-3.28872	0.576957
15	R	2	P	A	Q	2	2	2	FALSE	97	-2.66746	0.705204	0.0669028	1.13241	NA	NA	-1.90336	0.598617
15	R	2	S	A	Q	2	2	2	FALSE	74	-2.40826	0.860618	-1.19913	1.14683	NA	NA	-1.97265	0.688352
15	R	2	T	A	Q	2	2	2	FALSE	144	-0.976437	0.529627	-1.94989	0.711567	-1.36678	1.00768	-1.33001	0.391485
15	R	2	V	A	Q	2	2	2	FALSE	177.667	-3.048	0.519789	-3.27156	0.785265	-3.4143	1.10211	-3.15605	0.403364
15	R	3	*	E	Q	2	2	2	TRUE	132	-5.58737	1.52262	-5.22574	1.73973	NA	NA	-5.43051	1.14577
15	R	3	D	E	Q	2	2	2	FALSE	51	NA	NA	-2.57915	1.43664	NA	NA	-2.57915	1.43664
15	R	3	G	E	Q	2	2	2	FALSE	107	-1.76227	0.783749	-2.34527	0.89049	NA	NA	-2.01675	0.588332
15	R	3	K	E	Q	2	2	2	FALSE	78	NA	NA	-2.71719	1.17798	NA	NA	-2.71719	1.17798
15	R	3	V	E	Q	2	2	2	FALSE	168.667	-3.43042	0.729799	-3.05469	0.884832	-4.65439	0.835415	-3.70809	0.46688
15	R	4	I	F	Q	2	2	2	FALSE	165.667	-2.78329	0.62246	-2.02803	0.650356	-1.23752	0.815639	-2.14605	0.3938
15	R	4	L	F	Q	2	2	2	FALSE	287.667	-3.08423	0.398521	-2.71399	0.681993	-3.16034	0.681678	-3.02458	0.30717
15	R	4	S	F	Q	2	2	2	FALSE	288	-2.75358	0.463073	-3.55261	0.570961	-1.30738	0.725365	-2.72268	0.322221
15	R	4	V	F	Q	2	2	2	FALSE	56	-3.5305	1.22004	NA	NA	NA	NA	-3.5305	1.22004
15	R	4	Y	F	Q	2	2	2	FALSE	262.667	-1.81878	0.4506	-1.80169	0.512681	-3.21024	0.745881	-2.05019	0.308208
15	R	5	*	R	Q	2	2	2	TRUE	171.333	-4.32543	0.726442	-5.82933	1.64305	NA	NA	-4.57134	0.6644
15	R	5	G	R	Q	2	2	2	FALSE	70	-3.07468	0.992236	-3.58062	1.41754	NA	NA	-3.24106	0.812882
15	R	5	L	R	Q	2	2	2	FALSE	216.333	-3.08198	0.494217	-2.1482	0.587348	-2.33476	1.0236	-2.65165	0.354723
15	R	5	Q	R	Q	2	2	2	FALSE	205	-3.26128	0.487076	-1.96048	0.669833	-2.10819	0.960397	-2.7101	0.364468
15	R	6	D	H	Q	2	2	2	FALSE	58	-3.97106	1.33905	NA	NA	NA	NA	-3.97106	1.33905
15	R	6	L	H	Q	2	2	2	FALSE	175	-1.52853	0.474257	-3.63732	0.806034	-2.6815	1.00177	-2.15799	0.37846
15	R	6	Q	H	Q	2	2	2	FALSE	226.333	-2.7974	0.489669	-1.8536	0.571709	-1.84488	0.799028	-2.29952	0.33717
15	R	6	R	H	Q	2	2	2	FALSE	182	-2.02242	0.594899	-2.94772	0.637979	-2.56599	0.819613	-2.47767	0.384299
15	R	6	Y	H	Q	2	2	2	FALSE	154.667	-3.76655	0.606722	-2.72233	0.859567	-3.4361	1.17445	-3.42184	0.456673
15	R	7	A	D	Q	2	2	2	FALSE	59	-2.72901	0.969336	-3.68443	1.68224	NA	NA	-2.96717	0.839881
15	R	7	E	D	Q	2	2	2	FALSE	152	-2.39155	0.6694	-1.51156	0.74989	NA	NA	-2.0013	0.499378
15	R	7	G	D	Q	2	2	2	FALSE	118.333	-1.95369	0.58307	-0.591093	0.863318	-2.81001	0.979394	-1.77803	0.433324
15	R	7	N	D	Q	2	2	2	FALSE	113.667	-1.66666	0.567775	-0.757979	0.858544	-2.9139	1.1307	-1.61758	0.436815
15	R	7	V	D	Q	2	2	2	FALSE	146.667	-3.15418	0.598601	-3.54241	0.940164	-1.576	0.8965	-2.85912	0.439955
15	R	7	Y	D	Q	2	2	2	FALSE	64	-2.44959	1.01533	-1.99016	1.16692	NA	NA	-2.25163	0.765973
15	R	8	A	S	Q	2	2	2	FALSE	59	NA	NA	-3.4231	1.4898	NA	NA	-3.4231	1.4898
15	R	8	L	S	Q	2	2	2	FALSE	84.5	-2.10784	0.826939	-3.82533	1.31976	NA	NA	-2.59204	0.700744
15	R	8	P	S	Q	2	2	2	FALSE	102	NA	NA	-2.66669	1.02531	NA	NA	-2.66669	1.02531
15	R	8	T	S	Q	2	2	2	FALSE	168	-3.40206	0.639447	-3.28187	0.81711	-3.14432	0.817222	-3.29804	0.428718
15	R	9	*	G	Q	2	2	2	TRUE	154.667	-2.08659	0.587085	-5.1413	1.24377	-3.14432	0.952004	-2.76207	0.463682
15	R	9	E	G	Q	2	2	2	FALSE	113	-3.71728	1.00781	-2.71349	0.89267	NA	NA	-3.1548	0.668229
15	R	9	R	G	Q	2	2	2	FALSE	69	NA	NA	-2.36934	1.21376	NA	NA	-2.36934	1.21376
15	R	9	V	G	Q	2	2	2	FALSE	94.5	-1.84164	0.731565	-2.84991	1.11897	NA	NA	-2.14356	0.612315
15	R	10	*	Y	Q	2	2	2	TRUE	169.667	-5.25295	1.10769	-4.25586	0.918445	-4.08573	1.14955	-4.5039	0.602231
15	R	10	C	Y	Q	2	2	2	FALSE	143.333	-3.14929	0.599508	-2.67922	0.798484	-1.93073	1.05412	-2.80002	0.436405
15	R	10	F	Y	Q	2	2	2	FALSE	106	-1.86836	0.793546	-2.1253	0.792361	-3.13183	0.9946	-2.2707	0.488434
15	R	10	H	Y	Q	2	2	2	FALSE	93	-0.929184	0.676982	-1.75139	0.918742	-1.63282	1.0289	-1.30929	0.481611
15	R	10	N	Y	Q	2	2	2	FALSE	120.667	-0.0888629	0.57376	-3.19004	0.884243	-1.19253	1.01998	-1.04136	0.435284
15	R	11	D	E	Q	2	2	2	FALSE	331.333	-1.59747	0.355943	-1.51776	0.505359	-1.41265	0.633321	-1.54343	0.264427
15	R	11	G	E	Q	2	2	2	FALSE	221	-0.993783	0.447481	-1.68996	0.573419	-1.37857	0.755848	-1.27897	0.319672
15	R	11	K	E	Q	2	2	2	FALSE	107	-2.46698	1.00854	-3.00661	0.862314	NA	NA	-2.77872	0.655407
15	R	11	V	E	Q	2	2	2	FALSE	316.333	-3.3262	0.478052	-3.85033	0.609183	-3.12309	0.690219	-3.43373	0.330239
15	R	12	A	V	Q	2	2	2	FALSE	170.667	-0.83134	0.660512	-1.63107	0.59606	-1.40656	0.717632	-1.30915	0.376661
15	R	12	D	V	Q	2	2	2	FALSE	211.333	-0.653772	0.452996	-0.111626	0.59621	-1.03965	0.701265	-0.577588	0.320753
15	R	12	F	V	Q	2	2	2	FALSE	88	0.0797234	0.951442	-2.21263	0.896108	NA	NA	-1.13505	0.652329
15	R	12	G	V	Q	2	2	2	FALSE	61	-0.843435	0.893587	NA	NA	NA	NA	-0.843435	0.893587
15	R	12	I	V	Q	2	2	2	FALSE	125.5	-3.30438	0.756814	-3.41454	1.05728	NA	NA	-3.3417	0.615401
15	R	12	L	V	Q	2	2	2	FALSE	50	NA	NA	-2.55923	1.44826	NA	NA	-2.55923	1.44826
15	R	13	L	H	Q	2	2	2	FALSE	209	-3.36311	0.518108	-2.28442	0.623553	-2.92827	1.03399	-2.92329	0.371839
15	R	13	N	H	Q	2	2	2	FALSE	100.5	-0.34912	0.694157	-0.752726	0.939224	NA	NA	-0.4917	0.55824
15	R	13	Q	H	Q	2	2	2	FALSE	224.667	-2.49083	0.416429	-3.91287	0.844941	-2.96464	0.922155	-2.79635	0.346205
15	R	13	R	H	Q	2	2	2	FALSE	243	-3.43351	0.535819	-2.88152	0.627487	-4.55994	0.922678	-3.42256	0.372744
15	R	13	Y	H	Q	2	2	2	FALSE	112.5	-0.697791	0.789091	-2.79174	0.865909	NA	NA	-1.64778	0.583242
15	R	14	D	H	Q	2	2	2	FALSE	52	NA	NA	-2.30926	1.39137	NA	NA	-2.30926	1.39137
15	R	14	L	H	Q	2	2	2	FALSE	172.667	-0.777898	0.479894	-1.18838	0.638378	-0.61644	0.909769	-0.879367	0.35346
15	R	14	N	H	Q	2	2	2	FALSE	91	-0.396123	0.727425	NA	NA	NA	NA	-0.396123	0.727425
15	R	14	P	H	Q	2	2	2	FALSE	65	NA	NA	-0.426094	1.16407	NA	NA	-0.426094	1.16407
15	R	14	Q	H	Q	2	2	2	FALSE	232.667	-1.2394	0.406514	-2.60298	0.672962	-2.62318	0.730142	-1.79258	0.314112
15	R	14	R	H	Q	2	2	2	FALSE	129.333	-2.31548	0.635821	-2.91201	0.893109	-1.80812	0.811411	-2.31115	0.436595
15	R	14	Y	H	Q	2	2	2	FALSE	147.5	-3.02561	0.643318	-4.18645	1.20359	NA	NA	-3.28356	0.567359
16	*	1	E	D	K	2	2	2	TRUE	236.667	-4.18109	0.612179	-4.84722	1.05914	-4.99048	1.06938	-4.47462	0.474887
16	*	1	G	D	K	2	2	2	TRUE	221.667	-3.44231	0.659583	-3.27302	0.660274	-5.2437	1.02812	-3.6799	0.42492
16	*	1	N	D	K	2	2	2	TRUE	227.667	-4.90444	0.815345	-3.79633	0.730555	-4.17563	1.01225	-4.2642	0.47925
16	*	1	V	D	K	2	2	2	TRUE	274	-5.25135	0.906748	-4.01161	0.689853	-6.11004	1.5716	-4.64492	0.518307
16	*	1	Y	D	K	2	2	2	TRUE	73.5	-4.24135	1.26786	-4.71465	1.87256	NA	NA	-4.39012	1.04986
16	*	2	E	A	K	2	2	2	TRUE	63	NA	NA	NA	NA	-4.19401	1.27571	-4.19401	1.27571
16	*	2	S	A	K	2	2	2	TRUE	71.5	-4.77815	1.64507	-4.1119	1.49979	NA	NA	-4.41431	1.10832
16	*	2	T	A	K	2	2	2	TRUE	135	-3.88718	0.79278	-4.20426	1.0385	-4.73518	1.35587	-4.13382	0.57145
16	*	2	V	A	K	2	2	2	TRUE	87	-4.10027	1.06585	-1.24195	1.06	-5.48382	1.67029	-3.13819	0.685399
16	*	3	G	E	K	2	2	2	TRUE	121.667	-4.05692	0.835824	-4.04524	1.07895	-3.88831	1.21918	-4.01525	0.580924
16	*	3	K	E	K	2	2	2	TRUE	112.333	-4.38795	1.01058	-4.29245	1.17505	-4.22387	1.26535	-4.31422	0.655405
16	*	3	V	E	K	2	2	2	TRUE	157	-3.64298	0.689461	NA	NA	-5.41663	1.21118	-4.07706	0.599182
16	*	4	I	F	K	2	2	2	TRUE	117.333	-5.80226	1.50273	-5.09868	1.76755	-2.85179	1.02768	-4.0366	0.76477
16	*	4	L	F	K	2	2	2	TRUE	260	-4.56157	0.764286	NA	NA	-4.96809	0.944721	-4.72238	0.594188
16	*	4	S	F	K	2	2	2	TRUE	211.333	-4.76654	0.829195	-5.3115	1.21885	-4.5348	1.02565	-4.81415	0.569974
16	*	4	Y	F	K	2	2	2	TRUE	237.667	-4.65555	0.841619	-4.50072	0.872593	-5.27844	1.02316	-4.76197	0.521259
16	*	5	*	R	K	2	2	2	TRUE	105.333	NA	NA	-5.26749	1.73124	NA	NA	-5.26749	1.73124
16	*	5	L	R	K	2	2	2	TRUE	135	-4.6813	1.18095	-4.78312	1.30977	NA	NA	-4.72696	0.877077
16	*	5	Q	R	K	2	2	2	TRUE	125.333	-4.69254	0.964822	-5.43995	1.6993	-1.34299	1.09303	-3.56531	0.665548
16	*	6	L	H	K	2	2	2	TRUE	166.667	-4.7309	0.959857	-4.47138	0.98074	-3.00759	0.907269	-4.02328	0.547182
16	*	6	Q	H	K	2	2	2	TRUE	170	-3.91535	0.73052	-4.70516	1.08405	-5.08752	1.27033	-4.33349	0.546809
16	*	6	R	H	K	2	2	2	TRUE	212.333	-3.92399	0.645088	-3.17398	0.683143	-4.37576	0.962158	-3.72508	0.421599
16	*	6	Y	H	K	2	2	2	TRUE	102.333	-3.35103	0.996793	-2.34436	0.762196	-5.09641	1.76709	-2.96591	0.572783
16	*	7	A	D	K	2	2	2	TRUE	74	NA	NA	-4.75629	1.85947	NA	NA	-4.75629	1.85947
16	*	7	E	D	K	2	2	2	TRUE	72	-3.49413	1.0686	NA	NA	NA	NA	-3.49413	1.0686
16	*	7	G	D	K	2	2	2	TRUE	80	-0.960437	0.784619	NA	NA	NA	NA	-0.960437	0.784619
16	*	7	N	D	K	2	2	2	TRUE	88.5	-4.4324	1.22617	-3.501	1.2588	NA	NA	-3.97893	0.878341
16	*	7	V	D	K	2	2	2	TRUE	109.667	-4.85226	1.15505	-3.92847	1.11186	NA	NA	-4.37277	0.801038
16	*	8	L	S	K	2	2	2	TRUE	72.5	-3.24282	1.14989	-4.24462	1.45391	NA	NA	-3.62832	0.901903
16	*	8	P	S	K	2	2	2	TRUE	66	-3.70984	1.16416	-3.18357	1.39924	-4.00606	1.17642	-3.68206	0.712256
16	*	8	T	S	K	2	2	2	TRUE	66.6667	-3.91187	1.10959	-3.7604	1.64558	NA	NA	-3.86453	0.91999
16	*	9	*	G	K	2	2	2	TRUE	185.333	-6.00192	1.48753	-4.82207	1.30159	-2.47398	0.66322	-3.37286	0.549182
16	*	9	E	G	K	2	2	2	TRUE	113.5	-4.56458	1.20097	-4.154	1.2128	NA	NA	-4.3613	0.853367
16	*	9	R	G	K	2	2	2	TRUE	86	NA	NA	-3.5359	1.43727	NA	NA	-3.5359	1.43727
16	*	9	V	G	K	2	2	2	TRUE	73	NA	NA	-4.04524	1.52463	NA	NA	-4.04524	1.52463
16	*	10	*	Y	K	2	2	2	TRUE	157.667	-4.96898	0.932504	-4.48779	1.12824	-4.64023	1.38365	-4.74532	0.637846
16	*	10	C	Y	K	2	2	2	TRUE	125	-3.73198	0.822304	NA	NA	-5.47195	1.67278	-4.07062	0.73796
16	*	10	F	Y	K	2	2	2	TRUE	147	-4.01326	0.94144	-4.21596	1.03572	NA	NA	-4.10497	0.696649
16	*	10	H	Y	K	2	2	2	TRUE	108.667	-0.936202	0.706455	-5.15511	1.75481	-3.24771	0.831569	-2.18477	0.514716
16	*	10	N	Y	K	2	2	2	TRUE	120.333	-5.03458	1.13138	-4.69317	1.32971	-3.38444	1.19661	-4.37668	0.699253
16	*	11	D	E	K	2	2	2	TRUE	226.333	-4.14679	0.696245	-3.60937	0.704605	-3.89144	0.806682	-3.88407	0.422056
16	*	11	G	E	K	2	2	2	TRUE	207.333	-4.085	0.759949	-5.48378	1.19717	-4.16318	0.935688	-4.38327	0.529149
16	*	11	K	E	K	2	2	2	TRUE	114.5	-4.50573	1.21184	NA	NA	NA	NA	-4.50573	1.21184
16	*	11	V	E	K	2	2	2	TRUE	237.333	-2.99815	0.498134	-0.972599	0.576888	-4.00452	0.817761	-2.46106	0.34239
16	*	12	A	V	K	2	2	2	TRUE	105	-5.35735	1.54883	-4.1119	1.22509	-4.44585	1.19548	-4.53417	0.748931
16	*	12	D	V	K	2	2	2	TRUE	157.667	-4.49149	0.772805	-5.63367	1.66884	-4.39807	1.46511	-4.63817	0.63254
16	*	12	I	V	K	2	2	2	TRUE	121	-4.7309	1.17304	-4.52838	1.37027	NA	NA	-4.64525	0.891113
16	*	12	L	V	K	2	2	2	TRUE	62.5	-4.76264	1.64839	NA	NA	NA	NA	-4.76264	1.64839
16	*	13	L	H	K	2	2	2	TRUE	195	-4.37268	0.720597	-4.54948	0.966024	-4.85629	1.32351	-4.50315	0.529384
16	*	13	N	H	K	2	2	2	TRUE	73.5	NA	NA	-2.91555	1.09151	-2.06449	1.10469	-2.49513	0.776432
16	*	13	P	H	K	2	2	2	TRUE	58	-4.6642	1.67052	NA	NA	NA	NA	-4.6642	1.67052
16	*	13	Q	H	K	2	2	2	TRUE	150.333	-5.88188	1.49632	-4.72872	1.32166	-5.12259	1.26316	-5.19164	0.779481
16	*	13	R	H	K	2	2	2	TRUE	214	-4.36108	0.722011	-4.22407	0.925066	-5.51286	1.19697	-4.53118	0.514018
16	*	13	Y	H	K	2	2	2	TRUE	81.5	-1.97748	0.828823	-3.08117	1.18535	NA	NA	-2.3399	0.679246
16	*	14	L	H	K	2	2	2	TRUE	124	-4.15338	0.81985	-3.33401	1.00544	-4.709	1.36331	-3.9837	0.575913
16	*	14	N	H	K	2	2	2	TRUE	74.5	-3.76783	1.14763	-3.70397	1.36615	NA	NA	-3.74141	0.878728
16	*	14	Q	H	K	2	2	2	TRUE	167.667	-4.3955	1.0093	-5.28372	1.22267	-3.0977	0.810831	-3.96044	0.561512
16	*	14	R	H	K	2	2	2	TRUE	191.667	-5.01454	0.927894	-4.55641	1.11344	-6.04674	1.57912	-5.03328	0.649694
16	*	14	Y	H	K	2	2	2	TRUE	104	-4.92789	1.14476	NA	NA	NA	NA	-4.92789	1.14476
16	*	15	*	Q	K	2	2	2	TRUE	67	-4.11531	1.29915	NA	NA	NA	NA	-4.11531	1.29915
16	*	15	H	Q	K	2	2	2	TRUE	137	-3.98815	0.673723	-4.36187	1.41708	-5.41028	1.68615	-4.21296	0.572334
16	*	15	L	Q	K	2	2	2	TRUE	230.333	-5.24172	0.907522	-4.55862	0.86299	-3.72346	1.06476	-4.58559	0.539245
16	*	15	R	Q	K	2	2	2	TRUE	247.667	-5.0811	0.921488	-4.43618	0.807219	-6.11004	1.5716	-4.89723	0.566392
[truncated: 13,568 more rows]

## Sheet: synonymous
Pos	WT_AA	Mut	Nham_nt	Nham_aa	Nmut_codons	STOP	mean_count	nscore1	sigma1	nscore2	sigma2	nscore3	sigma3	nscore	sigma
NA	NA	NA	2	0	2	FALSE	140.5	-0.24451	0.560466	-0.277875	0.835687	NA	NA	-0.254861	0.465475
NA	NA	NA	2	0	2	FALSE	303.667	0.130487	0.346568	0.162275	0.485075	0.484648	0.776068	0.181283	0.265036
NA	NA	NA	2	0	2	FALSE	347	0.0743223	0.407785	-1.25439	0.397037	0.433247	0.676117	-0.451204	0.262208
NA	NA	NA	2	0	2	FALSE	219.667	-0.093697	0.435079	-0.0359749	0.556222	0.101961	0.765136	-0.0427556	0.312757
NA	NA	NA	2	0	2	FALSE	340.333	-0.465681	0.336446	-0.0831513	0.459177	-0.0699333	0.708553	-0.298518	0.253437
NA	NA	NA	2	0	2	FALSE	232.667	0.25907	0.412869	0.370624	0.550781	0.0775136	0.748609	0.263068	0.302237
NA	NA	NA	2	0	2	FALSE	96	-1.14276	0.721769	NA	NA	NA	NA	-1.14276	0.721769
NA	NA	NA	2	0	2	FALSE	165	0.360347	0.497681	1.40664	0.620963	0.850898	0.909333	0.782114	0.35714
NA	NA	NA	2	0	2	FALSE	276.333	-0.37052	0.390279	-0.464353	0.471701	1.20325	0.826481	-0.220223	0.282577
NA	NA	NA	2	0	2	FALSE	314.667	0.446522	0.39233	-0.415194	0.441694	-0.151581	0.660536	0.030569	0.268082
NA	NA	NA	2	0	2	FALSE	167.5	0.193182	0.503308	1.21813	0.77786	NA	NA	0.495654	0.422566
NA	NA	NA	2	0	2	FALSE	202	-0.369733	0.495875	0.164158	0.656839	NA	NA	-0.175913	0.395759
NA	NA	NA	2	0	2	FALSE	71	NA	NA	-1.86424	1.15917	NA	NA	-1.86424	1.15917
NA	NA	NA	2	0	2	FALSE	309.333	0.348778	0.373173	0.151049	0.46767	-0.0588734	0.658662	0.21763	0.266708
NA	NA	NA	3	0	3	FALSE	67	-4.11531	1.29915	NA	NA	NA	NA	-4.11531	1.29915
NA	NA	NA	2	0	2	FALSE	171.333	-0.256361	0.502218	-0.474749	0.617448	-0.133602	0.854041	-0.307189	0.354468
NA	NA	NA	2	0	2	FALSE	174.667	0.37	0.58076	-0.671318	0.563474	0.0152997	0.799857	-0.129398	0.360902
NA	NA	NA	2	0	2	FALSE	68.5	-0.528538	0.86656	-0.786905	1.10478	NA	NA	-0.626949	0.681837
NA	NA	NA	2	0	2	FALSE	354.333	-0.556295	0.306833	0.416719	0.527717	-0.280888	0.642694	-0.306156	0.245193
NA	NA	NA	2	0	2	FALSE	243	-0.153483	0.39741	-0.385846	0.549758	-0.0988372	0.754559	-0.212521	0.296216
NA	NA	NA	2	0	2	FALSE	59	-0.363811	0.899326	NA	NA	NA	NA	-0.363811	0.899326
NA	NA	NA	2	0	2	FALSE	345	0.0242117	0.350261	0.013862	0.432868	0.291212	0.693251	0.0563482	0.253439
NA	NA	NA	2	0	2	FALSE	266.667	-0.668665	0.376734	-0.357771	0.490682	0.399129	0.971189	-0.470992	0.285605
NA	NA	NA	2	0	2	FALSE	63	0.47275	0.876401	0.231802	1.15675	NA	NA	0.384881	0.698551
NA	NA	NA	2	0	2	FALSE	140.5	-0.354416	0.654115	-0.329117	0.724807	NA	NA	-0.34306	0.485604
NA	NA	NA	2	0	2	FALSE	429.667	0.0223374	0.315236	-0.326502	0.397891	-0.0486885	0.6182	-0.10344	0.229439
NA	NA	NA	2	0	2	FALSE	374.333	-0.114362	0.345652	-0.113907	0.445509	-0.369976	0.567837	-0.162241	0.246111
NA	NA	NA	2	0	2	FALSE	146	-0.398318	0.535913	0.642496	0.846906	NA	NA	-0.100718	0.452861
NA	NA	NA	2	0	2	FALSE	232	-0.377837	0.378109	0.0507947	0.594178	0.668628	0.843241	-0.138749	0.298361
NA	NA	NA	2	0	2	FALSE	251.333	-0.822243	0.40156	-0.28195	0.481994	0.89762	1.08523	-0.488824	0.29676
NA	NA	NA	2	0	2	FALSE	336	0.0606752	0.348637	-0.211394	0.443038	0.193576	0.716589	-0.0131524	0.255912
NA	NA	NA	2	0	2	FALSE	345.667	-0.175806	0.349191	-0.100866	0.426317	0.257384	0.735308	-0.0977799	0.253569
NA	NA	NA	2	0	2	FALSE	504.333	0.049091	0.284993	-0.18698	0.370057	-0.122462	0.623358	-0.0485011	0.212296
NA	NA	NA	2	0	2	FALSE	343	-0.293754	0.339511	0.039245	0.468643	-0.464457	0.643374	-0.223198	0.252824
NA	NA	NA	2	0	2	FALSE	55	-0.0465703	0.895297	0.434766	1.30387	NA	NA	0.107656	0.738056
NA	NA	NA	2	0	2	FALSE	155	-0.222394	0.500756	0.0299786	0.655923	0.00583015	0.965865	-0.109825	0.368001
NA	NA	NA	2	0	2	FALSE	256.333	0.167524	0.41927	-0.823486	0.487708	0.0212901	0.780343	-0.214487	0.294435
NA	NA	NA	2	0	2	FALSE	79.5	0.195608	0.900518	-0.340216	0.93357	NA	NA	-0.0626513	0.648132
NA	NA	NA	1	0	1	FALSE	46995.3	-0.0941961	0.11273	-0.00829653	0.0723527	0.101342	0.313634	-0.0284654	0.059774
NA	NA	NA	2	0	2	FALSE	119	-0.0581501	0.651413	-0.0933451	0.837419	NA	NA	-0.0714181	0.514168
NA	NA	NA	2	0	2	FALSE	71	-0.292706	0.803623	0.335728	1.13026	NA	NA	-0.0816893	0.65495
NA	NA	NA	2	0	2	FALSE	415.333	-0.251262	0.323878	-0.25603	0.392876	-0.0605193	0.658667	-0.228946	0.233655
NA	NA	NA	2	0	2	FALSE	59	NA	NA	-0.171361	1.2181	NA	NA	-0.171361	1.2181
NA	NA	NA	2	0	2	FALSE	124	0.0807273	0.642169	-0.258026	0.816399	NA	NA	-0.0487537	0.504735
NA	NA	NA	2	0	2	FALSE	292.333	-0.350375	0.330821	0.45641	0.547714	-0.204949	0.790715	-0.142703	0.266595
NA	NA	NA	2	0	2	FALSE	121	-0.27138	0.528966	0.161967	0.801334	-1.21426	1.08091	-0.293454	0.408687
NA	NA	NA	2	0	2	FALSE	52	NA	NA	-1.43901	1.33027	NA	NA	-1.43901	1.33027
NA	NA	NA	2	0	2	FALSE	137	-0.433217	0.454626	0.136919	0.867453	-0.596123	1.06357	-0.346188	0.376588
NA	NA	NA	2	0	2	FALSE	64	-0.100658	0.781044	0.64508	1.31542	NA	NA	0.0937242	0.671581
NA	NA	NA	2	0	2	FALSE	229.333	0.0238801	0.424804	-0.0955961	0.508655	0.499167	0.932768	0.0318844	0.30779
NA	NA	NA	2	0	2	FALSE	309.667	-0.369057	0.385537	-0.329592	0.447006	-0.00660825	0.7	-0.301012	0.269453
NA	NA	NA	2	0	2	FALSE	153.5	-0.224272	0.609933	-0.592614	0.70877	NA	NA	-0.38099	0.462316
NA	NA	NA	2	0	2	FALSE	66	-0.699072	0.85659	NA	NA	NA	NA	-0.699072	0.85659
NA	NA	NA	2	0	2	FALSE	309.667	0.111486	0.376313	0.212683	0.447285	0.456075	0.718287	0.195334	0.267279
NA	NA	NA	2	0	2	FALSE	484	-0.122965	0.294944	-0.224469	0.360209	0.515192	0.702961	-0.0989796	0.217053
NA	NA	NA	2	0	2	FALSE	175.667	-0.362846	0.417203	0.0370952	0.692181	0.558896	1.04842	-0.171438	0.338213
NA	NA	NA	2	0	2	FALSE	210	-0.551576	0.472522	-0.636575	0.674272	NA	NA	-0.579571	0.386962
NA	NA	NA	2	0	2	FALSE	482	0.453437	0.324857	-0.140231	0.375499	-0.314962	0.517595	0.104749	0.221945
NA	NA	NA	2	0	2	FALSE	514.333	0.118141	0.295248	-0.236379	0.342345	0.35767	0.66757	0.00633659	0.212009
NA	NA	NA	2	0	2	FALSE	83	-0.91295	0.724093	-0.412217	1.106	NA	NA	-0.762718	0.605808
NA	NA	NA	2	0	2	FALSE	232.667	-0.145679	0.39342	-0.283149	0.581264	0.48911	0.770045	-0.0859284	0.300056
NA	NA	NA	2	0	2	FALSE	84.5	0.436582	0.939513	-1.17688	0.884836	NA	NA	-0.418462	0.644136
NA	NA	NA	2	0	2	FALSE	334.667	-0.385934	0.354002	0.0174288	0.451467	-0.358838	0.671237	-0.25094	0.257296
NA	NA	NA	2	0	2	FALSE	506.333	0.272854	0.302644	-0.322956	0.358101	0.362872	0.572227	0.0720587	0.214325
NA	NA	NA	2	0	2	FALSE	123	1.13084	0.605769	-0.43473	0.868713	NA	NA	0.618637	0.496891
NA	NA	NA	2	0	2	FALSE	83	NA	NA	-1.51933	1.05659	NA	NA	-1.51933	1.05659
NA	NA	NA	2	0	2	FALSE	105.667	0.74938	0.587357	0.331729	0.87767	-0.206857	0.960308	0.450375	0.435144
NA	NA	NA	3	0	3	FALSE	54	NA	NA	-4.43929	1.97123	NA	NA	-4.43929	1.97123
NA	NA	NA	2	0	2	FALSE	403.333	-0.109483	0.302836	0.955754	0.450194	-0.220567	0.616244	0.159226	0.232676
NA	NA	NA	2	0	2	FALSE	277.667	-0.682352	0.387719	-0.444507	0.481089	0.464789	0.788685	-0.454074	0.281936
NA	NA	NA	3	0	3	FALSE	54	NA	NA	-1.85877	1.32835	NA	NA	-1.85877	1.32835
NA	NA	NA	2	0	2	FALSE	187.667	-0.58878	0.436865	-0.515487	0.60021	0.124576	1.07775	-0.496672	0.335645
NA	NA	NA	2	0	2	FALSE	281	-0.261272	0.349212	-0.163213	0.554013	-0.615411	0.72194	-0.288183	0.273415
NA	NA	NA	2	0	2	FALSE	102	0.356014	0.663175	0.408219	0.951428	NA	NA	0.373084	0.544052
NA	NA	NA	2	0	2	FALSE	142	0.608686	0.506782	-0.409556	0.699174	0.326851	1.02361	0.267513	0.380868
NA	NA	NA	2	0	2	FALSE	262.333	-0.453281	0.382502	-0.423415	0.487847	0.516539	0.992087	-0.361115	0.288043
NA	NA	NA	2	0	2	FALSE	100	0.49485	0.681174	0.326196	0.942172	NA	NA	0.436956	0.552014
NA	NA	NA	2	0	2	FALSE	107	NA	NA	-1.41602	0.927698	NA	NA	-1.41602	0.927698
NA	NA	NA	3	0	3	FALSE	55	NA	NA	0.195295	1.25757	NA	NA	0.195295	1.25757
NA	NA	NA	2	0	2	FALSE	368	-0.169014	0.320188	-0.580807	0.447505	0.334342	0.697146	-0.229745	0.243937
NA	NA	NA	2	0	2	FALSE	435.333	0.0426631	0.332642	-0.609191	0.386325	-0.169274	0.578557	-0.224398	0.231093
NA	NA	NA	2	0	2	FALSE	138.5	-0.294441	0.552381	0.647153	0.861168	NA	NA	-0.0199646	0.464952
NA	NA	NA	2	0	2	FALSE	105.5	-1.44286	0.793719	-0.30245	0.82303	NA	NA	-0.893325	0.571325
NA	NA	NA	2	0	2	FALSE	305	0.00578574	0.358553	0.204164	0.468064	0.180717	0.75923	0.0916637	0.266522
NA	NA	NA	2	0	2	FALSE	735	0.0768665	0.25882	-0.0258104	0.312939	-0.034526	0.469504	0.0245076	0.183569
NA	NA	NA	2	0	2	FALSE	92.5	-0.139925	0.88176	-0.484555	0.844525	NA	NA	-0.31967	0.609908
NA	NA	NA	2	0	2	FALSE	73.5	0.562471	0.76201	-0.207712	1.1523	NA	NA	0.328136	0.635601
NA	NA	NA	2	0	2	FALSE	82	0.00573528	0.765752	0.507808	1.02238	NA	NA	0.186169	0.612899
NA	NA	NA	2	0	2	FALSE	129.5	-0.276549	0.624525	-0.165008	0.806541	NA	NA	-0.234739	0.493795
NA	NA	NA	2	0	2	FALSE	57	-0.430919	0.949238	-0.984992	1.21311	NA	NA	-0.641333	0.747576
NA	NA	NA	2	0	2	FALSE	105	-0.433541	0.705544	-1.72735	0.913706	NA	NA	-0.916823	0.558435
NA	NA	NA	2	0	2	FALSE	57	-0.983251	0.927561	NA	NA	NA	NA	-0.983251	0.927561
NA	NA	NA	2	0	2	FALSE	79	0.163493	0.950624	-0.0971159	0.909037	NA	NA	0.0273637	0.656996
NA	NA	NA	2	0	2	FALSE	94	NA	NA	-1.60923	0.996478	NA	NA	-1.60923	0.996478
NA	NA	NA	2	0	2	FALSE	144.5	0.435762	0.624678	0.75274	0.721273	NA	NA	0.571619	0.4722
NA	NA	NA	2	0	2	FALSE	84.5	-1.34008	0.843022	-0.779085	0.953882	NA	NA	-1.09406	0.631682
NA	NA	NA	2	0	2	FALSE	60	-0.113139	0.888655	NA	NA	NA	NA	-0.113139	0.888655
NA	NA	NA	2	0	2	FALSE	76.5	-0.578761	0.78219	0.243695	1.08426	NA	NA	-0.297242	0.634351
NA	NA	NA	2	0	2	FALSE	80.5	-1.14415	0.697427	0.20864	1.22458	NA	NA	-0.812826	0.606033
NA	NA	NA	2	0	2	FALSE	97.5	-0.504916	0.79095	-1.46538	0.885082	NA	NA	-0.931375	0.589768
NA	NA	NA	2	0	2	FALSE	77	NA	NA	-0.746481	1.07502	NA	NA	-0.746481	1.07502
NA	NA	NA	2	0	2	FALSE	121	0.550302	0.786241	-0.208895	0.728157	NA	NA	0.141627	0.53424
NA	NA	NA	2	0	2	FALSE	89	-0.751087	0.816173	-0.72515	0.920794	NA	NA	-0.739675	0.610776
NA	NA	NA	2	0	2	FALSE	80	-0.548192	0.829524	0.382278	0.98265	NA	NA	-0.161023	0.633867
NA	NA	NA	2	0	2	FALSE	68	-0.852978	0.847282	NA	NA	NA	NA	-0.852978	0.847282
NA	NA	NA	2	0	2	FALSE	92.5	0.423025	0.684809	-0.73162	1.02913	NA	NA	0.0686675	0.570123
NA	NA	NA	2	0	2	FALSE	68.5	0.153334	0.941827	-0.948037	1.03345	NA	NA	-0.346376	0.696114
NA	NA	NA	2	0	2	FALSE	128	-0.0929362	0.55761	0.113656	0.934115	NA	NA	-0.0386603	0.478792
NA	NA	NA	2	0	2	FALSE	80	-0.556134	0.767687	-0.00111545	1.05815	NA	NA	-0.364741	0.621381
NA	NA	NA	2	0	2	FALSE	95	-1.0801	0.723963	NA	NA	NA	NA	-1.0801	0.723963
NA	NA	NA	2	0	2	FALSE	104.5	-1.12289	0.644383	-0.183468	0.998141	NA	NA	-0.846535	0.541369
NA	NA	NA	1	0	1	FALSE	9347	0.00476703	0.125109	0.055796	0.104322	0.370887	0.335283	0.0530192	0.0779277
NA	NA	NA	2	0	2	FALSE	138.5	-0.252364	0.60348	-0.229938	0.781607	NA	NA	-0.243988	0.477669
NA	NA	NA	2	0	2	FALSE	104.5	-0.177677	0.706325	-0.340783	0.882843	NA	NA	-0.241334	0.551532
NA	NA	NA	2	0	2	FALSE	98	0.114576	0.696842	NA	NA	NA	NA	0.114576	0.696842
NA	NA	NA	2	0	2	FALSE	67	NA	NA	-0.76161	1.15252	NA	NA	-0.76161	1.15252
NA	NA	NA	2	0	2	FALSE	54	-0.10411	0.935907	NA	NA	NA	NA	-0.10411	0.935907
NA	NA	NA	2	0	2	FALSE	74.5	-1.30821	0.753591	-0.495506	1.2126	NA	NA	-1.08178	0.640058
NA	NA	NA	2	0	2	FALSE	99	-0.0892049	0.669182	-0.156202	0.981344	NA	NA	-0.11047	0.552874
NA	NA	NA	2	0	2	FALSE	89	-0.495548	0.679559	0.305138	1.0912	NA	NA	-0.271793	0.576844
NA	NA	NA	2	0	2	FALSE	58	0.51547	0.855681	0.541153	1.29057	NA	NA	0.523312	0.713166
NA	NA	NA	2	0	2	FALSE	59	-0.874637	0.909133	NA	NA	NA	NA	-0.874637	0.909133
NA	NA	NA	2	0	2	FALSE	90.3333	0.228699	0.699564	-0.184166	0.922909	0.0293433	0.928414	0.0651366	0.477952
NA	NA	NA	2	0	2	FALSE	144.5	-0.523181	0.585329	-0.958567	0.785087	NA	NA	-0.678731	0.469262
NA	NA	NA	2	0	2	FALSE	144	-0.690773	0.58536	-0.00429085	0.779917	NA	NA	-0.443412	0.468166
NA	NA	NA	2	0	2	FALSE	95	-0.305269	0.831872	-1.2953	0.869335	NA	NA	-0.778495	0.60103
NA	NA	NA	2	0	2	FALSE	59	-0.857542	0.916408	0.579378	1.20144	NA	NA	-0.32903	0.72864
NA	NA	NA	2	0	2	FALSE	82	0.505661	0.716279	-0.614106	1.00362	-0.859814	0.965373	-0.136167	0.499069
NA	NA	NA	2	0	2	FALSE	111.5	0.157705	0.693101	0.122913	0.839238	NA	NA	0.143597	0.534412
NA	NA	NA	2	0	2	FALSE	79	0.134409	0.788951	-0.809777	1.04304	NA	NA	-0.209203	0.629223
NA	NA	NA	2	0	2	FALSE	52	-0.320899	0.956445	NA	NA	NA	NA	-0.320899	0.956445
NA	NA	NA	2	0	2	FALSE	99	0.306193	0.706229	0.412295	0.918648	NA	NA	0.345607	0.559899
NA	NA	NA	2	0	2	FALSE	243.667	-0.324379	0.453837	0.0265537	0.472745	0.212836	0.824433	-0.10582	0.304278
NA	NA	NA	2	0	2	FALSE	208.667	0.235097	0.439933	-0.575844	0.562638	0.211004	0.84021	-0.0313529	0.320382
NA	NA	NA	2	0	2	FALSE	308.333	-0.800472	0.354867	-0.901929	0.472811	-0.0703372	0.803593	-0.751999	0.267618
NA	NA	NA	2	0	2	FALSE	180.333	-0.18236	0.541842	-0.620103	0.524927	1.04685	1.08495	-0.251402	0.356128
NA	NA	NA	2	0	2	FALSE	182	0.0404695	0.495554	-1.06633	0.559147	-1.00594	1.0417	-0.509376	0.349383
NA	NA	NA	2	0	2	FALSE	211.667	-0.294413	0.392001	-0.787872	0.605268	0.362712	1.00761	-0.362864	0.312771
NA	NA	NA	2	0	2	FALSE	372.333	-0.0655474	0.315267	-0.63204	0.426107	0.408417	0.847983	-0.210653	0.242827
NA	NA	NA	2	0	2	FALSE	140.5	0.197498	0.613861	-0.472897	0.758182	NA	NA	-0.067954	0.477091
NA	NA	NA	2	0	2	FALSE	171.5	0.0574808	0.486271	0.477846	0.799749	NA	NA	0.170943	0.415495
NA	NA	NA	2	0	2	FALSE	266.333	0.28207	0.39564	-0.562821	0.497339	0.0455952	0.748704	-0.0320984	0.286119
NA	NA	NA	2	0	2	FALSE	196.5	0.21795	0.542581	-0.298364	0.621403	NA	NA	-0.00540314	0.408707
NA	NA	NA	2	0	2	FALSE	134	-0.280988	0.619743	-1.22788	0.80128	NA	NA	-0.635409	0.490224
NA	NA	NA	2	0	2	FALSE	233.333	-0.649823	0.40594	-0.207399	0.531951	0.0550771	0.900751	-0.425335	0.3038
NA	NA	NA	2	0	2	FALSE	191.333	0.0223211	0.513184	-0.480674	0.542301	-0.875694	0.858887	-0.319977	0.341932
NA	NA	NA	2	0	2	FALSE	66.5	0.617777	0.771125	NA	NA	-1.84668	1.07767	-0.216761	0.627115
NA	NA	NA	2	0	2	FALSE	337	-0.18397	0.336377	-0.13887	0.44129	0.238045	0.828202	-0.12909	0.254568
NA	NA	NA	2	0	2	FALSE	199	-0.237299	0.45151	-0.341937	0.545813	0.488563	1.03988	-0.202464	0.329928
NA	NA	NA	2	0	2	FALSE	54	-0.452212	0.932404	-1.63107	1.32713	NA	NA	-0.841802	0.762932
NA	NA	NA	2	0	2	FALSE	176.5	-0.337133	0.522403	-1.25365	0.726942	NA	NA	-0.649257	0.424223
NA	NA	NA	2	0	2	FALSE	371	-0.0448108	0.34682	-0.950375	0.395422	0.44961	0.809101	-0.354992	0.248171
NA	NA	NA	2	0	2	FALSE	251.333	-0.398237	0.380177	-0.329919	0.527704	0.526969	0.879279	-0.276064	0.291071
NA	NA	NA	2	0	2	FALSE	92	0.870501	0.734536	-0.547189	0.955147	NA	NA	0.343652	0.582268
NA	NA	NA	2	0	2	FALSE	201	-0.339413	0.430453	0.255782	0.815862	NA	NA	-0.209808	0.380713
NA	NA	NA	2	0	2	FALSE	192	-0.218524	0.421098	-1.03378	0.619708	-0.0345467	1.02509	-0.430354	0.32978
NA	NA	NA	2	0	2	FALSE	255.667	-0.259935	0.392906	-0.346593	0.486113	0.475255	0.992199	-0.22752	0.292037
NA	NA	NA	2	0	2	FALSE	182.333	0.199496	0.50707	-0.564831	0.550164	0.87944	0.976975	-0.0204871	0.348351
NA	NA	NA	2	0	2	FALSE	62	NA	NA	-1.26244	1.21181	NA	NA	-1.26244	1.21181
NA	NA	NA	2	0	2	FALSE	322.667	-0.245501	0.34374	-0.00395023	0.44654	0.440397	0.870033	-0.10242	0.259942
NA	NA	NA	2	0	2	FALSE	206	0.00166346	0.440133	-0.306023	0.558704	0.332561	0.889599	-0.057279	0.322256
NA	NA	NA	2	0	2	FALSE	84	NA	NA	-1.56796	1.05222	NA	NA	-1.56796	1.05222
NA	NA	NA	2	0	2	FALSE	148	0.517251	0.677839	-1.04815	0.684887	NA	NA	-0.257352	0.481777
NA	NA	NA	2	0	2	FALSE	261	-0.31083	0.420266	-0.473908	0.612261	NA	NA	-0.363059	0.346492
NA	NA	NA	2	0	2	FALSE	90	NA	NA	-1.10134	1.00206	NA	NA	-1.10134	1.00206
NA	NA	NA	1	0	1	FALSE	35001.3	-0.104864	0.11375	-0.23769	0.0752901	0.207463	0.316765	-0.181929	0.0615852
NA	NA	NA	2	0	2	FALSE	101	-0.510076	0.658725	0.298826	0.983153	NA	NA	-0.259455	0.547246
NA	NA	NA	2	0	2	FALSE	79	-1.01661	0.851222	-1.2171	1.0051	NA	NA	-1.10035	0.64957
NA	NA	NA	2	0	2	FALSE	300.667	-0.0482361	0.380865	-0.866189	0.459857	-0.207314	0.734245	-0.357124	0.272393
NA	NA	NA	2	0	2	FALSE	63	-0.619762	0.874907	NA	NA	NA	NA	-0.619762	0.874907
NA	NA	NA	2	0	2	FALSE	95.5	-0.405091	0.727535	-0.844132	0.945489	NA	NA	-0.56837	0.576592
NA	NA	NA	2	0	2	FALSE	287.5	-0.316919	0.411667	-0.222886	0.565118	NA	NA	-0.284319	0.332742
NA	NA	NA	2	0	2	FALSE	113	-0.449611	0.59468	0.379545	0.993727	NA	NA	-0.230971	0.510286
NA	NA	NA	2	0	2	FALSE	138.5	0.0810171	0.631689	-0.0463267	0.747415	NA	NA	0.0279564	0.482458
NA	NA	NA	2	0	2	FALSE	56	NA	NA	-0.23076	1.25099	NA	NA	-0.23076	1.25099
NA	NA	NA	2	0	2	FALSE	207	-0.243977	0.39731	-0.142745	0.595203	0.715718	1.0758	-0.132722	0.315885
NA	NA	NA	2	0	2	FALSE	308	-0.555532	0.351209	-0.358749	0.478144	0.0844362	0.77104	-0.418755	0.265716
NA	NA	NA	2	0	2	FALSE	74.5	-0.237011	0.777618	0.64508	1.11222	NA	NA	0.0526056	0.637301
NA	NA	NA	2	0	2	FALSE	91	NA	NA	-2.38382	1.05853	NA	NA	-2.38382	1.05853
NA	NA	NA	2	0	2	FALSE	193	0.649594	0.450417	-0.397141	0.569306	-0.105311	0.973134	0.205655	0.332036
NA	NA	NA	2	0	2	FALSE	285.333	-0.205882	0.360266	-0.200554	0.47973	0.11798	0.916697	-0.175025	0.274827
NA	NA	NA	2	0	2	FALSE	140	0.658919	0.607126	-0.289257	0.763888	NA	NA	0.291846	0.475293
NA	NA	NA	2	0	2	FALSE	205	-0.369733	0.495875	-1.01841	0.657918	NA	NA	-0.604732	0.395995
NA	NA	NA	2	0	2	FALSE	372	-0.39645	0.306735	-0.350333	0.498666	-0.916787	0.627989	-0.462433	0.241222
NA	NA	NA	2	0	2	FALSE	389	-0.588258	0.307008	-0.105328	0.429785	0.109201	0.770966	-0.374324	0.237652
NA	NA	NA	2	0	2	FALSE	80	-1.23237	0.747293	0.484195	1.1131	NA	NA	-0.699049	0.620438
NA	NA	NA	2	0	2	FALSE	178.333	-0.072003	0.485865	-0.599755	0.602157	-0.00271413	0.8761	-0.236549	0.34717
NA	NA	NA	2	0	2	FALSE	85.5	-0.042384	0.766183	-1.46645	1.01291	NA	NA	-0.560652	0.611058
NA	NA	NA	2	0	2	FALSE	302.333	0.382148	0.395902	-0.80695	0.428214	0.723355	0.82329	-0.0672783	0.274112
NA	NA	NA	2	0	2	FALSE	323	-0.755809	0.335424	-0.431267	0.478574	-0.064758	0.786941	-0.585463	0.259333
NA	NA	NA	2	0	2	FALSE	94	-0.731595	0.805045	-1.15052	0.89583	NA	NA	-0.918761	0.598785
NA	NA	NA	2	0	2	FALSE	126	-0.0168369	0.610595	-0.310327	0.846075	NA	NA	-0.117346	0.495124
NA	NA	NA	2	0	2	FALSE	290.333	-0.103613	0.386743	-0.74963	0.474923	-0.0656122	0.712872	-0.316751	0.276425
NA	NA	NA	2	0	2	FALSE	149	0.0259157	0.510537	0.306389	0.666039	0.895053	0.976947	0.24205	0.374278
NA	NA	NA	2	0	2	FALSE	148	0.318227	0.584992	0.0402925	0.749235	NA	NA	0.212963	0.461092
NA	NA	NA	2	0	2	FALSE	167.667	-0.110591	0.454284	1.03148	0.675878	-0.676632	0.921214	0.112601	0.348938
NA	NA	NA	2	0	2	FALSE	60	NA	NA	-0.715523	1.21673	NA	NA	-0.715523	1.21673
NA	NA	NA	2	0	2	FALSE	137	-0.927549	0.594816	0.0802392	0.810771	NA	NA	-0.574921	0.479592
NA	NA	NA	2	0	2	FALSE	234.333	-0.16742	0.41807	-0.0703076	0.49383	0.49362	1.0576	-0.0751081	0.305481
NA	NA	NA	2	0	2	FALSE	58	0.241191	0.878056	-0.909987	1.27536	NA	NA	-0.128998	0.723225
NA	NA	NA	2	0	1	FALSE	211	-0.25698	0.504695	-0.118165	0.620236	NA	NA	-0.201682	0.391468
NA	NA	NA	2	0	2	FALSE	262.667	0.0171518	0.417163	-0.0232159	0.515049	-0.0929821	0.647968	-0.0176855	0.289914
NA	NA	NA	2	0	2	FALSE	329	0.123039	0.387386	-0.55682	0.434722	-0.197907	0.638182	-0.181288	0.263428
NA	NA	NA	2	0	2	FALSE	186	-0.238552	0.45065	-0.505288	0.595374	0.312432	0.985436	-0.259646	0.337581
NA	NA	NA	2	0	2	FALSE	65	-1.54637	0.817701	0.468826	1.27885	NA	NA	-0.96157	0.688913
NA	NA	NA	2	0	2	FALSE	219.5	-0.00050969	0.471715	0.374256	0.633173	NA	NA	0.133254	0.378278
NA	NA	NA	2	0	2	FALSE	160	-0.293015	0.469489	-0.629446	0.762379	-1.57886	0.806878	-0.620715	0.358212
NA	NA	NA	2	0	2	FALSE	329.667	-0.442667	0.328276	0.205193	0.498879	-0.527481	0.692031	-0.284986	0.254943
NA	NA	NA	2	0	2	FALSE	157	0.584463	0.701183	-1.42215	0.651552	NA	NA	-0.492365	0.477299
NA	NA	NA	2	0	2	FALSE	161.5	-0.159076	0.568713	-0.777485	0.719058	NA	NA	-0.397053	0.44606
NA	NA	NA	2	0	2	FALSE	67	NA	NA	-0.996643	1.15797	NA	NA	-0.996643	1.15797
NA	NA	NA	2	0	2	FALSE	297.667	-0.412578	0.389469	-0.290129	0.479581	-0.291658	0.647101	-0.350968	0.273911
NA	NA	NA	2	0	2	FALSE	158.333	-0.027339	0.637626	-1.02391	0.602147	0.249118	0.776603	-0.36042	0.381366
NA	NA	NA	2	0	2	FALSE	182.5	-0.540171	0.500918	0.00760477	0.724509	NA	NA	-0.36301	0.412028
NA	NA	NA	2	0	2	FALSE	263.667	-0.152099	0.421426	-0.0551169	0.483394	-0.525065	0.719183	-0.17794	0.290575
NA	NA	NA	2	0	2	FALSE	172	0.261236	0.484218	0.420309	0.675871	-1.3183	0.757763	-0.0319195	0.349308
NA	NA	NA	2	0	2	FALSE	263.333	0.0928636	0.416837	-0.59944	0.464174	0.640105	0.851741	-0.115956	0.29142
NA	NA	NA	2	0	2	FALSE	230.667	-0.319	0.385762	-0.189475	0.578502	-0.159768	0.858511	-0.264496	0.300629
NA	NA	NA	2	0	2	FALSE	89	0.0144223	0.727206	0.0763341	0.9958	NA	NA	0.0359559	0.587278
NA	NA	NA	2	0	2	FALSE	380	-0.21759	0.333632	-0.35169	0.436713	-0.248206	0.60703	-0.263999	0.242958
NA	NA	NA	2	0	2	FALSE	195	0.151119	0.480344	0.0678942	0.576081	-0.357923	0.775732	0.0293868	0.333165
NA	NA	NA	2	0	2	FALSE	114	-0.458345	0.649703	-1.01389	0.892864	NA	NA	-0.65067	0.525341
NA	NA	NA	2	0	2	FALSE	148	-0.156545	0.532517	-0.179693	0.649348	1.42376	0.976232	0.0742331	0.379395
NA	NA	NA	2	0	2	FALSE	92	0.0277412	0.719331	NA	NA	NA	NA	0.0277412	0.719331
NA	NA	NA	2	0	2	FALSE	188.333	0.019792	0.455393	0.00907745	0.587424	-0.388583	0.924778	-0.0374186	0.335403
NA	NA	NA	2	0	2	FALSE	235.333	0.13328	0.400826	-0.124168	0.525743	0.348446	0.910448	0.0724718	0.300848
NA	NA	NA	2	0	2	FALSE	200.333	-0.37995	0.411423	0.269052	0.619671	0.389596	0.910333	-0.110494	0.320772
NA	NA	NA	2	0	2	FALSE	274	0.360031	0.436286	-0.372064	0.453243	-0.163507	0.72219	-0.0193699	0.28821
NA	NA	NA	2	0	2	FALSE	287.333	0.155475	0.39494	0.0658547	0.471427	-0.170358	0.692524	0.0721677	0.277394
NA	NA	NA	2	0	2	FALSE	102	0.543516	0.612179	0.620913	1.06074	NA	NA	0.562854	0.530214
NA	NA	NA	2	0	2	FALSE	152	-0.138215	0.443305	0.178555	0.78423	-0.646578	0.998117	-0.137596	0.359947
NA	NA	NA	2	0	2	FALSE	56	NA	NA	0.759716	1.2425	NA	NA	0.759716	1.2425
NA	NA	NA	1	0	1	FALSE	30109	-0.058872	0.114728	0.259181	0.0774402	0.0990675	0.315991	0.15723	0.0629019
NA	NA	NA	2	0	2	FALSE	109.5	-0.294657	0.617501	0.370127	0.972023	NA	NA	-0.10351	0.521219
NA	NA	NA	2	0	2	FALSE	80	NA	NA	-0.5896	1.05203	NA	NA	-0.5896	1.05203
NA	NA	NA	2	0	2	FALSE	328.333	0.208876	0.36158	-0.172252	0.44674	0.164064	0.678451	0.0735568	0.259658
NA	NA	NA	2	0	2	FALSE	104.5	-0.661391	0.626425	0.0806202	1.01911	NA	NA	-0.457916	0.533668
NA	NA	NA	2	0	2	FALSE	166.667	-0.366288	0.504287	-0.461245	0.617337	0.0997218	0.916764	-0.326873	0.359302
NA	NA	NA	2	0	2	FALSE	124	-0.648545	0.599071	-1.07912	0.902213	NA	NA	-0.780297	0.49907
NA	NA	NA	2	0	2	FALSE	195.5	-0.991527	0.547676	-0.931038	0.635905	NA	NA	-0.965767	0.414982
NA	NA	NA	2	0	2	FALSE	79	-0.451421	0.780305	NA	NA	NA	NA	-0.451421	0.780305
NA	NA	NA	2	0	2	FALSE	183	0.179899	0.505888	0.172223	0.704971	NA	NA	0.17729	0.411013
NA	NA	NA	2	0	2	FALSE	211.333	0.336768	0.428696	0.367549	0.61795	-0.766569	0.707501	0.125627	0.315318
NA	NA	NA	2	0	2	FALSE	132.5	0.00714722	0.601478	-0.10294	0.815109	NA	NA	-0.0316635	0.483976
NA	NA	NA	2	0	2	FALSE	79.5	0.315601	0.850486	-0.415448	0.968461	NA	NA	-0.00270719	0.639047
NA	NA	NA	2	0	2	FALSE	261	0.0179263	0.397195	-0.263392	0.486288	0.288917	0.844104	-0.0496794	0.289027
NA	NA	NA	2	0	2	FALSE	337	-0.0402925	0.371266	-0.28917	0.409168	0.171851	0.779888	-0.116796	0.259307
NA	NA	NA	2	0	2	FALSE	112.333	0.901163	0.601856	0.000292622	0.779887	0.252696	0.985638	0.505766	0.428977
NA	NA	NA	2	0	2	FALSE	174	-0.618743	0.434066	-0.905067	0.67414	-0.485482	1.04478	-0.67904	0.344541
NA	NA	NA	2	0	2	FALSE	57	NA	NA	-1.17784	1.26075	NA	NA	-1.17784	1.26075
NA	NA	NA	2	0	2	FALSE	402	0.30474	0.334097	-0.601798	0.427598	-0.263943	0.561089	-0.0795037	0.238335
NA	NA	NA	3	0	3	FALSE	70	NA	NA	-1.97589	1.17427	NA	NA	-1.97589	1.17427
NA	NA	NA	3	0	3	FALSE	99	-0.922216	0.706179	NA	NA	NA	NA	-0.922216	0.706179
NA	NA	NA	2	0	2	FALSE	350.667	-0.145036	0.337856	-0.830628	0.451856	0.144263	0.674927	-0.316781	0.251151
NA	NA	NA	2	0	2	FALSE	62.5	-0.760331	0.83927	-0.0672542	1.24896	NA	NA	-0.544728	0.696604
NA	NA	NA	2	0	2	FALSE	217.333	0.30371	0.487394	-0.891849	0.496793	0.324016	0.879791	-0.200611	0.323536
NA	NA	NA	2	0	2	FALSE	82	0.580506	0.757356	NA	NA	NA	NA	0.580506	0.757356
NA	NA	NA	2	0	2	FALSE	360	-0.491676	0.329435	-0.323898	0.432968	0.213343	0.756361	-0.361136	0.247714
NA	NA	NA	2	0	2	FALSE	344.667	0.0259494	0.349132	0.219159	0.455431	-0.306851	0.62518	0.0310844	0.253318
NA	NA	NA	2	0	2	FALSE	113.5	0.436863	0.813591	-0.724159	0.756239	NA	NA	-0.186008	0.553908
NA	NA	NA	2	0	2	FALSE	184	-0.71066	0.481247	-0.0428994	0.761998	NA	NA	-0.520257	0.406893
NA	NA	NA	2	0	2	FALSE	381.667	0.116497	0.306991	1.55037	0.470266	0.025258	0.622987	0.469343	0.237629
NA	NA	NA	2	0	2	FALSE	293	-0.147003	0.351693	0.286715	0.521639	-0.539941	0.702057	-0.0892241	0.269301
NA	NA	NA	2	0	2	FALSE	141.333	0.837391	0.597647	-0.307056	0.653347	0.16956	0.86169	0.285625	0.39256
NA	NA	NA	2	0	2	FALSE	178.333	0.201359	0.481195	-0.140385	0.570788	0.526665	1.0575	0.109832	0.347476
NA	NA	NA	2	0	2	FALSE	83	-1.6904	0.79418	NA	NA	NA	NA	-1.6904	0.79418
NA	NA	NA	2	0	2	FALSE	131.5	-0.559637	0.606618	0.421915	0.818141	NA	NA	-0.211442	0.487285
NA	NA	NA	2	0	2	FALSE	200.333	-0.341398	0.404341	-0.413278	0.615645	0.65011	1.02269	-0.263306	0.320898
NA	NA	NA	2	0	2	FALSE	136	-0.884224	0.522762	0.98562	0.991054	NA	NA	-0.477212	0.462379
NA	NA	NA	2	0	2	FALSE	194.667	0.443368	0.509936	-0.174882	0.566864	-0.459001	0.73534	0.0354193	0.336965
NA	NA	NA	2	0	2	FALSE	277.667	-0.0395484	0.370351	0.32929	0.523904	-0.408228	0.695399	0.00516737	0.277329
NA	NA	NA	2	0	2	FALSE	176	-0.561383	0.465783	-1.06015	0.6267	0.148805	0.958698	-0.621702	0.348294
NA	NA	NA	2	0	2	FALSE	165.333	-0.403896	0.469315	0.334823	0.688849	-0.779378	0.858029	-0.273145	0.353423
NA	NA	NA	2	0	2	FALSE	269.333	-0.350704	0.367377	0.612129	0.535646	-0.096024	0.738817	-0.0503592	0.280313
NA	NA	NA	2	0	2	FALSE	137.333	-0.0239434	0.537679	-1.07566	0.699878	-0.279572	1.01052	-0.393928	0.392842
NA	NA	NA	2	0	2	FALSE	194.5	-0.0503766	0.514938	-0.222422	0.655886	NA	NA	-0.115984	0.405025
NA	NA	NA	2	0	2	FALSE	379.667	0.0309135	0.325993	0.189736	0.482456	-0.33063	0.54793	0.000279928	0.242273
NA	NA	NA	2	0	2	FALSE	156	0.13231	0.532251	-0.112832	0.63407	0.0576899	0.890495	0.0356061	0.370668
NA	NA	NA	2	0	2	FALSE	164.333	-1.23131	0.469406	0.208752	0.72555	-0.274676	0.83404	-0.709346	0.356335
NA	NA	NA	2	0	2	FALSE	59	NA	NA	-1.67797	1.26043	NA	NA	-1.67797	1.26043
NA	NA	NA	2	0	2	FALSE	195.667	-0.329009	0.444477	-0.100256	0.592611	0.130032	0.866331	-0.192346	0.328947
NA	NA	NA	2	0	2	FALSE	239.333	0.063068	0.56008	-1.94726	0.505617	-0.0155838	0.626922	-0.773089	0.322015
NA	NA	NA	2	0	2	FALSE	64	-0.319994	0.863414	NA	NA	NA	NA	-0.319994	0.863414
NA	NA	NA	2	0	2	FALSE	264.667	-0.535133	0.375767	-0.271008	0.514024	-0.452055	0.831061	-0.444191	0.284963
NA	NA	NA	2	0	2	FALSE	178	-0.370781	0.436747	-0.105707	0.638373	0.426898	1.04006	-0.209791	0.340585
NA	NA	NA	2	0	2	FALSE	76	NA	NA	-0.100905	1.0729	NA	NA	-0.100905	1.0729
NA	NA	NA	2	0	2	FALSE	82	0.196357	0.871421	-0.0721981	0.926395	NA	NA	0.070284	0.634733
NA	NA	NA	2	0	2	FALSE	313.333	0.0171317	0.36967	-0.608556	0.464786	-0.532299	0.67722	-0.27269	0.266056
NA	NA	NA	2	0	2	FALSE	232	0.187024	0.42629	0.344839	0.583751	0.0734154	0.650545	0.205049	0.304285
NA	NA	NA	2	0	2	FALSE	63.5	0.0428653	0.925854	-0.876839	1.11432	NA	NA	-0.332744	0.712124
NA	NA	NA	2	0	2	FALSE	218	-0.356024	0.448005	0.492525	0.682733	NA	NA	-0.100621	0.374563
NA	NA	NA	2	0	2	FALSE	136.667	0.304388	0.569595	-0.223318	0.654313	0.446599	1.0315	0.13154	0.396592
NA	NA	NA	2	0	2	FALSE	305	-0.140273	0.365026	-0.259191	0.472274	0.628855	0.713515	-0.0702086	0.267714
NA	NA	NA	2	0	2	FALSE	138.667	-0.0258499	0.573329	-0.766925	0.716868	0.485415	0.816264	-0.12983	0.392565
NA	NA	NA	2	0	2	FALSE	338	-0.628404	0.32905	-0.129773	0.47107	-0.314935	0.739658	-0.447287	0.253428
NA	NA	NA	2	0	2	FALSE	267.667	-0.0736394	0.381476	-0.574912	0.528595	-0.340815	0.709534	-0.26056	0.283558
NA	NA	NA	2	0	2	FALSE	114	-0.268914	0.737955	-0.532094	0.795605	NA	NA	-0.390625	0.541047
NA	NA	NA	2	0	2	FALSE	209.5	-0.57376	0.50245	-0.688693	0.634444	NA	NA	-0.61806	0.393889
NA	NA	NA	2	0	2	FALSE	58	-0.975325	0.919426	NA	NA	NA	NA	-0.975325	0.919426
NA	NA	NA	1	0	1	FALSE	29279.3	-0.228324	0.114932	-0.0981673	0.0783945	-0.0180344	0.31548	-0.134584	0.0634403
NA	NA	NA	2	0	2	FALSE	121	0.291622	0.737333	0.30947	0.750174	NA	NA	0.300392	0.525854
NA	NA	NA	2	0	2	FALSE	74.5	0.137395	0.878931	-1.01517	1.01127	NA	NA	-0.358585	0.663387
NA	NA	NA	2	0	2	FALSE	277	-0.0811714	0.387166	0.19717	0.515694	-0.285839	0.657783	-0.0361567	0.280137
NA	NA	NA	2	0	2	FALSE	120.5	0.103843	0.680219	-0.663432	0.802923	NA	NA	-0.216747	0.519008
NA	NA	NA	2	0	2	FALSE	84	-0.829886	0.763365	NA	NA	NA	NA	-0.829886	0.763365
NA	NA	NA	2	0	2	FALSE	198.667	-0.0441461	0.544056	-0.383693	0.542506	-0.237834	0.71791	-0.219619	0.338712
NA	NA	NA	2	0	2	FALSE	100.333	-0.807857	0.616717	0.0878322	0.968678	-0.277111	0.891997	-0.480378	0.449386
NA	NA	NA	2	0	2	FALSE	96	-0.277465	0.617342	-0.473634	1.1648	NA	NA	-0.320484	0.545467
NA	NA	NA	2	0	2	FALSE	55	-1.31526	0.955038	NA	NA	NA	NA	-1.31526	0.955038
NA	NA	NA	2	0	2	FALSE	144	-0.255455	0.539287	-0.431137	0.66559	-0.318517	0.974318	-0.324056	0.384925
NA	NA	NA	2	0	2	FALSE	252	-0.254472	0.410658	-0.0365491	0.531083	-0.0527376	0.688293	-0.151032	0.293786
NA	NA	NA	2	0	2	FALSE	151	0.56147	0.56485	1.58861	0.754027	NA	NA	0.930679	0.452073
NA	NA	NA	2	0	2	FALSE	266	-0.334542	0.373139	-0.404977	0.519428	-0.20374	0.804128	-0.339268	0.28358
NA	NA	NA	3	0	3	FALSE	65	-1.44594	0.884502	NA	NA	NA	NA	-1.44594	0.884502
NA	NA	NA	2	0	2	FALSE	254.333	-0.646549	0.369272	-0.382708	0.548816	0.300371	0.852529	-0.465424	0.288323
NA	NA	NA	2	0	2	FALSE	189.5	-0.00131125	0.530041	-0.0312765	0.653101	NA	NA	-0.0132105	0.411558
NA	NA	NA	2	0	2	FALSE	155	-1.43262	0.515585	0.552868	0.876593	NA	NA	-0.922296	0.444413
NA	NA	NA	2	0	2	FALSE	363.333	0.313148	0.39384	-0.583228	0.396846	-0.243667	0.615116	-0.15081	0.254496
NA	NA	NA	2	0	2	FALSE	385.667	-0.141863	0.321464	-0.156202	0.430432	-0.465627	0.653791	-0.189804	0.239636
NA	NA	NA	3	0	3	FALSE	78	-3.01456	0.937863	NA	NA	NA	NA	-3.01456	0.937863
NA	NA	NA	2	0	2	FALSE	78	0.623026	0.775928	NA	NA	NA	NA	0.623026	0.775928
NA	NA	NA	2	0	2	FALSE	194	-0.0513423	0.437996	0.923848	0.59373	0.570585	0.89923	0.329388	0.328158
NA	NA	NA	2	0	2	FALSE	258.333	0.241999	0.42178	0.84129	0.502163	-0.220534	0.679541	0.35899	0.291701
NA	NA	NA	2	0	2	FALSE	359	-0.511064	0.340998	-0.026034	0.455243	0.624376	0.609887	-0.176382	0.249117
NA	NA	NA	2	0	2	FALSE	159.5	-0.538165	0.528441	-0.268986	0.787393	NA	NA	-0.454574	0.438784
NA	NA	NA	2	0	2	FALSE	93.5	-1.332	0.930979	-0.919436	0.834227	NA	NA	-1.10317	0.621287
NA	NA	NA	2	0	2	FALSE	113.333	-0.955982	0.623817	-0.512382	0.778968	-0.771282	0.964469	-0.780343	0.434669
NA	NA	NA	2	0	2	FALSE	400.667	0.352555	0.364579	-1.16366	0.397059	-0.0197171	0.573763	-0.283277	0.243223
NA	NA	NA	2	0	2	FALSE	186	-0.311439	0.479836	-0.0752074	0.589002	0.109339	0.840528	-0.163713	0.340184
NA	NA	NA	2	0	2	FALSE	149	-0.625862	0.520982	-2.15632	0.702259	0.302918	0.978391	-0.941559	0.38471
NA	NA	NA	2	0	2	FALSE	248.333	-0.652394	0.402972	-0.574862	0.553967	-0.505647	0.701887	-0.604299	0.295571
NA	NA	NA	2	0	2	FALSE	344.333	0.00855798	0.348453	0.354823	0.451412	0.107955	0.637384	0.133131	0.253146
NA	NA	NA	2	0	2	FALSE	120.5	-0.2112	0.679607	-0.118472	0.800301	NA	NA	-0.172349	0.518026
NA	NA	NA	2	0	2	FALSE	145	-1.1002	0.560863	-1.17958	0.839356	NA	NA	-1.1247	0.466335
NA	NA	NA	2	0	2	FALSE	77	-1.28401	0.808262	NA	NA	NA	NA	-1.28401	0.808262
NA	NA	NA	2	0	2	FALSE	299.333	0.570214	0.365349	0.47109	0.55047	-0.568291	0.577989	0.299266	0.269335
NA	NA	NA	2	0	2	FALSE	185.333	-0.376512	0.453323	0.919228	0.720822	-1.60003	0.695746	-0.380329	0.336021
NA	NA	NA	2	0	2	FALSE	157.333	-0.147813	0.488558	0.556069	0.675386	-0.0576462	0.906493	0.0697	0.362767
NA	NA	NA	2	0	2	FALSE	246.667	-0.353121	0.39289	0.406999	0.569477	-0.201852	0.696582	-0.124637	0.293323
NA	NA	NA	2	0	2	FALSE	186.667	0.160122	0.504718	-0.112505	0.638414	-1.31038	0.679313	-0.291018	0.34207
NA	NA	NA	2	0	2	FALSE	74	-1.8633	0.849155	NA	NA	NA	NA	-1.8633	0.849155
NA	NA	NA	2	0	2	FALSE	358.667	0.231785	0.346622	-0.330206	0.450484	-0.232323	0.598276	-0.0216285	0.249652
NA	NA	NA	2	0	2	FALSE	233.667	-0.109972	0.411811	-0.101669	0.510897	0.135806	0.958747	-0.0823093	0.304069
NA	NA	NA	2	0	2	FALSE	123.5	0.0597535	0.592585	0.280365	0.889789	NA	NA	0.127538	0.493216
NA	NA	NA	2	0	2	FALSE	449	0.260031	0.328899	-0.52525	0.392534	0.244471	0.538068	-0.00837237	0.228287
NA	NA	NA	2	0	2	FALSE	297.333	0.0293357	0.393187	-0.0240391	0.47004	-0.0856163	0.652481	-0.00900448	0.273756
NA	NA	NA	2	0	2	FALSE	95	0.297025	0.63819	-0.454043	1.09902	NA	NA	0.10763	0.551889
NA	NA	NA	2	0	2	FALSE	131	0.362126	0.635219	-0.554207	0.694864	-0.289376	0.834112	-0.111294	0.408701
NA	NA	NA	2	0	2	FALSE	62	-0.526204	0.880168	NA	NA	NA	NA	-0.526204	0.880168
NA	NA	NA	2	0	2	FALSE	226.667	-0.685373	0.401487	-0.208757	0.560063	0.0924217	0.885397	-0.449923	0.306174
NA	NA	NA	2	0	2	FALSE	287	0.07204	0.367226	0.375847	0.496956	0.209608	0.723406	0.183665	0.27343
NA	NA	NA	2	0	2	FALSE	161.667	-0.0899994	0.490473	0.456192	0.625812	0.177316	1.0161	0.125337	0.360871
NA	NA	NA	2	0	2	FALSE	50	0.0589261	0.970256	NA	NA	NA	NA	0.0589261	0.970256
NA	NA	NA	2	0	2	FALSE	357.667	0.19877	0.369476	-0.302674	0.414569	0.267445	0.630257	0.0235134	0.252689
NA	NA	NA	2	0	2	FALSE	256.333	0.203192	0.387101	-0.362195	0.602644	-1.07693	0.624001	-0.20067	0.288734
NA	NA	NA	2	0	2	FALSE	59.5	-1.01774	0.912877	0.0571881	1.20542	NA	NA	-0.625949	0.727741
NA	NA	NA	2	0	2	FALSE	106.333	0.448074	0.619719	-0.880823	0.824096	-0.51532	0.982612	-0.12989	0.442288
NA	NA	NA	2	0	2	FALSE	186.667	-0.145929	0.447526	-0.375527	0.675244	-0.419349	0.747859	-0.256515	0.333812
NA	NA	NA	2	0	2	FALSE	98	-1.29691	0.592063	-0.44642	1.32717	NA	NA	-1.15574	0.540699
NA	NA	NA	1	0	1	FALSE	38637.7	-0.0634189	0.113766	-0.138058	0.0747932	-0.118554	0.313351	-0.115649	0.0612897
NA	NA	NA	2	0	2	FALSE	136.5	-1.05686	0.623344	-0.528994	0.784509	NA	NA	-0.85257	0.488041
NA	NA	NA	2	0	2	FALSE	275	-0.314403	0.411652	0.11893	0.472989	-0.0416744	0.712798	-0.113927	0.284679
NA	NA	NA	2	0	2	FALSE	78	NA	NA	-2.3968	1.14424	NA	NA	-2.3968	1.14424
NA	NA	NA	2	0	2	FALSE	109	0.228283	0.564492	0.578952	0.865129	-0.646979	1.00561	0.155617	0.427835
NA	NA	NA	2	0	2	FALSE	50	0.0993356	0.969837	NA	NA	NA	NA	0.0993356	0.969837
NA	NA	NA	2	0	2	FALSE	270.667	-0.588533	0.364963	-0.0357552	0.519742	0.154284	0.820829	-0.340472	0.280676
NA	NA	NA	2	0	2	FALSE	168.5	-1.5333	0.527	0.100077	0.771312	NA	NA	-1.01346	0.435131
NA	NA	NA	2	0	2	FALSE	160.333	0.0556472	0.481884	0.0958487	0.662043	-0.140188	0.935053	0.0385405	0.359636
NA	NA	NA	2	0	2	FALSE	73	0.647144	0.780735	NA	NA	-0.772386	0.94548	0.0716321	0.602015
NA	NA	NA	2	0	2	FALSE	168.333	-0.0816465	0.464286	0.436408	0.662202	0.00795358	0.895759	0.0767049	0.349946
NA	NA	NA	2	0	2	FALSE	330.333	-0.221265	0.373472	-0.966498	0.444345	-0.495942	0.658605	-0.524415	0.262255
NA	NA	NA	2	0	2	FALSE	121.667	0.0311759	0.537347	-0.737474	0.801045	0.0312175	1.01672	-0.168828	0.408619
NA	NA	NA	2	0	2	FALSE	60	-0.00807002	0.822714	-1.16452	1.34544	NA	NA	-0.322798	0.701891
NA	NA	NA	2	0	2	FALSE	280	-0.376083	0.381528	-0.290099	0.483906	0.265002	0.773531	-0.263793	0.279382
NA	NA	NA	2	0	2	FALSE	296.667	0.128488	0.392796	-0.681131	0.478509	-0.428772	0.644676	-0.239434	0.274671
NA	NA	NA	2	0	2	FALSE	191	0.0967928	0.429611	0.182355	0.659984	0.0803475	0.789676	0.115044	0.327604
NA	NA	NA	2	0	2	FALSE	127.333	0.49485	0.724066	-1.38741	0.628375	-0.10232	1.01737	-0.49364	0.430087
NA	NA	NA	2	0	2	FALSE	357	0.336855	0.388272	-0.641957	0.454939	-0.853498	0.526977	-0.261561	0.257634
NA	NA	NA	3	0	3	FALSE	55	-3.00166	1.11231	NA	NA	NA	NA	-3.00166	1.11231
NA	NA	NA	2	0	2	FALSE	386	0.217306	0.336284	0.357577	0.429168	-0.154902	0.585989	0.198546	0.241232
NA	NA	NA	2	0	2	FALSE	69.5	-0.497152	0.776155	-1.62047	1.25745	NA	NA	-0.807054	0.66047
NA	NA	NA	2	0	2	FALSE	224.667	0.0973324	0.508857	-0.924423	0.486167	0.200724	0.792591	-0.332039	0.321334
NA	NA	NA	2	0	2	FALSE	74.5	-0.536623	0.81794	1.07102	1.05894	NA	NA	0.0641147	0.647323
NA	NA	NA	2	0	2	FALSE	351.333	-0.348054	0.348538	-0.216629	0.447434	-0.433229	0.63216	-0.319869	0.252142
NA	NA	NA	2	0	2	FALSE	395	-0.408778	0.32663	0.244825	0.428598	-0.606692	0.601707	-0.23747	0.238508
NA	NA	NA	2	0	2	FALSE	67.5	0.135598	0.79933	-0.476831	1.20233	NA	NA	-0.0521168	0.665651
NA	NA	NA	2	0	2	FALSE	66	0.377067	0.8437	NA	NA	NA	NA	0.377067	0.8437
NA	NA	NA	2	0	2	FALSE	153.667	-1.21644	0.535157	0.0813504	0.634441	-0.034193	0.972795	-0.580347	0.377082
NA	NA	NA	2	0	2	FALSE	421	0.443121	0.34075	-0.00205201	0.392917	-0.240659	0.566652	0.16774	0.234377
NA	NA	NA	2	0	2	FALSE	127	-0.146046	0.529505	-0.0407772	0.764502	0.28888	1.02374	-0.0505521	0.400585
NA	NA	NA	2	0	2	FALSE	145	-0.0634539	0.61557	0.0666247	0.732925	NA	NA	-0.0096498	0.471373
NA	NA	NA	2	0	2	FALSE	179	0.261631	0.431215	0.594171	0.693513	-0.649705	0.84027	0.194088	0.335703
NA	NA	NA	2	0	2	FALSE	107	-0.786083	0.64078	0.774427	0.959761	NA	NA	-0.30495	0.532921
NA	NA	NA	2	0	2	FALSE	187.5	-1.28238	0.502802	-0.0340745	0.718393	NA	NA	-0.871944	0.411931
NA	NA	NA	2	0	2	FALSE	320.667	0.0335569	0.34227	0.381033	0.477548	0.0727727	0.708137	0.140955	0.258931
NA	NA	NA	2	0	2	FALSE	108.5	0.268726	0.585238	-0.133405	1.06627	NA	NA	0.175629	0.513041
NA	NA	NA	3	0	3	FALSE	71	NA	NA	-4.71465	1.87256	NA	NA	-4.71465	1.87256
NA	NA	NA	2	0	2	FALSE	100	-0.634067	0.605334	0.0412797	0.87185	0.638855	1.07599	-0.229056	0.45137
NA	NA	NA	2	0	2	FALSE	65	0.435662	0.898683	0.495759	1.09751	NA	NA	0.459783	0.695319
NA	NA	NA	2	0	2	FALSE	159.333	0.254062	0.545609	-0.945337	0.59757	0.202889	0.978735	-0.219626	0.372586
NA	NA	NA	2	0	2	FALSE	168	0.386841	0.584671	-0.489561	0.62289	-0.442707	0.707846	-0.135187	0.365184
NA	NA	NA	2	0	2	FALSE	256.333	0.0980584	0.416815	0.529906	0.510884	-0.280037	0.68527	0.170554	0.292143
NA	NA	NA	2	0	2	FALSE	120	0.893758	0.63054	-1.11808	0.696879	-0.161629	1.05135	-0.0365981	0.427215
NA	NA	NA	2	0	2	FALSE	65	NA	NA	-1.56282	1.19546	NA	NA	-1.56282	1.19546
NA	NA	NA	2	0	2	FALSE	97	NA	NA	-0.783454	0.958843	NA	NA	-0.783454	0.958843
NA	NA	NA	2	0	2	FALSE	250	0.245215	0.439894	0.0179822	0.518722	-0.504547	0.650909	0.0127339	0.298215
NA	NA	NA	2	0	2	FALSE	292.333	-0.317823	0.418941	-0.711548	0.462829	0.0151547	0.6462	-0.399372	0.279939
NA	NA	NA	2	0	2	FALSE	65.5	-0.149026	0.848338	-0.84179	1.17181	NA	NA	-0.387253	0.687165
NA	NA	NA	2	0	2	FALSE	115	-0.157475	0.613967	-0.426094	0.743466	0.0683832	1.02461	-0.207496	0.429754
NA	NA	NA	2	0	2	FALSE	53	-0.384399	0.948479	NA	NA	NA	NA	-0.384399	0.948479
NA	NA	NA	2	0	2	FALSE	152.333	-0.0291333	0.53467	-0.122364	0.62296	0.434828	0.999753	0.00251943	0.375946
NA	NA	NA	2	0	2	FALSE	210	0.489517	0.507176	1.41761	0.611603	NA	NA	0.867684	0.390405
NA	NA	NA	2	0	2	FALSE	123	-0.0957571	0.583464	0.169551	0.915673	NA	NA	-0.0191435	0.49206
NA	NA	NA	2	0	2	FALSE	235.333	-0.0699467	0.438887	-0.295178	0.517976	-0.127391	0.749275	-0.157966	0.30571
NA	NA	NA	2	0	2	FALSE	185	0.145643	0.476133	-0.489561	0.62289	-0.0708787	0.768598	-0.0851634	0.339398
NA	NA	NA	2	0	2	FALSE	88	-0.210955	0.67333	0.227192	1.11483	NA	NA	-0.0938458	0.576363
NA	NA	NA	2	0	2	FALSE	177	-0.00158646	0.514649	-0.0875796	0.718741	NA	NA	-0.0307328	0.418439
NA	NA	NA	1	0	1	FALSE	26549.7	-0.0640163	0.115438	-0.026238	0.0797316	0.100952	0.316426	-0.0326946	0.0642382
NA	NA	NA	2	0	2	FALSE	116	-0.834023	0.593346	-0.263142	0.982447	NA	NA	-0.681446	0.507904
NA	NA	NA	2	0	2	FALSE	87	NA	NA	-1.40138	1.0279	NA	NA	-1.40138	1.0279
NA	NA	NA	2	0	2	FALSE	235.333	0.066811	0.387601	0.179648	0.570304	-0.153041	0.800483	0.0671496	0.297594
NA	NA	NA	2	0	2	FALSE	109	-0.0986669	0.675437	-0.300695	0.88243	NA	NA	-0.173303	0.536351
NA	NA	NA	2	0	2	FALSE	142.333	0.10787	0.598657	-1.0011	0.624512	0.0157012	0.993838	-0.353394	0.396317
NA	NA	NA	2	0	2	FALSE	65.5	0.141345	0.794038	-0.581181	1.25661	NA	NA	-0.0648276	0.671256
NA	NA	NA	2	0	2	FALSE	63	-0.0224061	0.952536	-0.588002	1.09368	NA	NA	-0.266375	0.718297
NA	NA	NA	2	0	2	FALSE	140.333	-0.620954	0.53074	-0.290356	0.700097	-0.311859	0.967514	-0.470066	0.387533
NA	NA	NA	2	0	2	FALSE	179	-0.329519	0.489808	-0.417981	0.599427	0.266249	0.861396	-0.262436	0.347126
NA	NA	NA	2	0	2	FALSE	115.5	-0.45678	0.636397	-0.980084	0.900152	NA	NA	-0.631176	0.519645
NA	NA	NA	2	0	2	FALSE	270	-0.247568	0.352912	0.174047	0.574549	-0.0321794	0.721754	-0.117296	0.277584
NA	NA	NA	2	0	2	FALSE	233.667	-0.118744	0.400732	-0.492453	0.561969	0.146959	0.783082	-0.186779	0.301177
NA	NA	NA	2	0	2	FALSE	118.667	-0.282714	0.58897	0.0754876	0.730652	0.168222	1.06801	-0.0934062	0.42135
NA	NA	NA	2	0	2	FALSE	157	0.0322269	0.519887	-0.275655	0.638026	-0.457234	0.914047	-0.150299	0.368773
NA	NA	NA	2	0	2	FALSE	58	-0.53707	0.90975	NA	NA	NA	NA	-0.53707	0.90975
NA	NA	NA	2	0	2	FALSE	244.333	-0.0847226	0.414961	-0.198192	0.547676	-0.629311	0.684965	-0.221249	0.297842
NA	NA	NA	2	0	2	FALSE	360.333	-0.805034	0.313657	0.0747662	0.46851	0.0141135	0.731056	-0.471075	0.245503
NA	NA	NA	2	0	2	FALSE	65	-1.41085	0.883111	NA	NA	NA	NA	-1.41085	0.883111
NA	NA	NA	2	0	2	FALSE	118.667	0.291251	0.646321	-0.209677	0.76575	-0.417928	0.830866	-0.0479023	0.424559
NA	NA	NA	2	0	2	FALSE	232.333	0.211749	0.450977	-1.31965	0.526712	0.508184	0.734789	-0.267447	0.310481
NA	NA	NA	2	0	2	FALSE	287	-0.587978	0.345966	0.104462	0.552716	-0.0351938	0.710599	-0.340974	0.271078
NA	NA	NA	2	0	2	FALSE	106	-0.734601	0.679793	NA	NA	NA	NA	-0.734601	0.679793
NA	NA	NA	2	0	2	FALSE	246.333	0.917607	0.381207	0.262813	0.541973	1.42897	0.811334	0.794578	0.29105
NA	NA	NA	2	0	2	FALSE	62	NA	NA	0.866215	1.18052	NA	NA	0.866215	1.18052
NA	NA	NA	2	0	2	FALSE	52	NA	NA	-4.40132	1.98662	NA	NA	-4.40132	1.98662
NA	NA	NA	2	0	2	FALSE	104	NA	NA	-2.03567	0.967296	NA	NA	-2.03567	0.967296
NA	NA	NA	2	0	2	FALSE	72	-1.67296	0.881455	-1.48042	1.09532	NA	NA	-1.59728	0.686709
NA	NA	NA	2	0	2	FALSE	67	NA	NA	-0.57122	1.14893	NA	NA	-0.57122	1.14893
NA	NA	NA	2	0	2	FALSE	87	NA	NA	-1.64124	1.03698	NA	NA	-1.64124	1.03698
NA	NA	NA	2	0	2	FALSE	64	NA	NA	-0.780453	1.17954	NA	NA	-0.780453	1.17954
NA	NA	NA	1	0	1	FALSE	4267.33	-0.11651	0.143881	0.227113	0.14421	-0.297852	0.344378	0.0265324	0.0976728
NA	NA	NA	2	0	2	FALSE	85	-0.603762	0.819039	0.0220803	0.944249	NA	NA	-0.335058	0.618715
NA	NA	NA	2	0	2	FALSE	71	-0.646934	0.825436	NA	NA	NA	NA	-0.646934	0.825436
NA	NA	NA	2	0	2	FALSE	64	-0.912497	0.874335	NA	NA	NA	NA	-0.912497	0.874335
NA	NA	NA	2	0	2	FALSE	110.667	-0.135496	0.579833	0.961539	0.899212	-0.593745	0.879292	0.00330661	0.426227
NA	NA	NA	2	0	2	FALSE	96	0.0292814	0.632041	1.32396	1.09424	NA	NA	0.353165	0.547303
NA	NA	NA	2	0	2	FALSE	61	-0.540248	0.887484	NA	NA	NA	NA	-0.540248	0.887484
NA	NA	NA	2	0	2	FALSE	108	NA	NA	-0.98446	0.912599	NA	NA	-0.98446	0.912599
NA	NA	NA	2	0	2	FALSE	195.5	-0.89582	0.471233	-0.0264826	0.735741	NA	NA	-0.642936	0.396818
NA	NA	NA	2	0	2	FALSE	159.667	-0.323751	0.465809	-0.0763866	0.727211	-0.423331	0.864315	-0.281082	0.357181
NA	NA	NA	2	0	2	FALSE	133.5	0.157705	0.693101	-1.58677	0.745843	NA	NA	-0.650678	0.507719
NA	NA	NA	2	0	2	FALSE	154	-0.3395	0.549474	-0.446982	0.778274	NA	NA	-0.375254	0.448875
NA	NA	NA	2	0	2	FALSE	79	-1.57201	0.808514	NA	NA	NA	NA	-1.57201	0.808514
NA	NA	NA	2	0	2	FALSE	208.333	-0.123221	0.412526	-0.568266	0.587859	-0.313704	0.924329	-0.275205	0.317175
NA	NA	NA	2	0	2	FALSE	123	0.310692	0.660455	-0.0702032	0.654905	0.153956	1.04104	0.124513	0.4246
NA	NA	NA	2	0	2	FALSE	122.5	-1.42696	0.646807	-0.71004	0.854323	NA	NA	-1.16575	0.515683
NA	NA	NA	2	0	2	FALSE	153	0.264901	0.530116	-0.774629	0.635388	0.298613	0.96476	-0.0921663	0.375035
NA	NA	NA	2	0	2	FALSE	223.667	-0.834874	0.44973	-0.392083	0.505214	0.255422	0.933466	-0.536558	0.316074
NA	NA	NA	2	0	2	FALSE	53	NA	NA	-2.20993	1.36857	NA	NA	-2.20993	1.36857
NA	NA	NA	2	0	2	FALSE	182.667	0.00184831	0.530022	-1.5094	0.543041	-0.590397	1.02069	-0.717844	0.355545
NA	NA	NA	2	0	2	FALSE	187	-0.971487	0.494251	-0.0721145	0.727183	NA	NA	-0.687295	0.40877
NA	NA	NA	2	0	2	FALSE	57.5	-0.36014	0.906878	-1.58577	1.27752	NA	NA	-0.770815	0.739497
NA	NA	NA	2	0	2	FALSE	97.5	-0.634534	0.60976	-0.526785	1.18397	NA	NA	-0.611946	0.542092
NA	NA	NA	2	0	2	FALSE	279.333	-0.621461	0.388282	-0.616167	0.476825	0.0489035	0.79637	-0.535777	0.281629
NA	NA	NA	2	0	2	FALSE	186.333	-0.404273	0.464489	-0.515401	0.58629	0.274599	0.939407	-0.352877	0.339474
NA	NA	NA	2	0	2	FALSE	65.5	-1.19463	0.875505	-1.21934	1.17318	NA	NA	-1.20347	0.70166
NA	NA	NA	2	0	2	FALSE	138	-0.597862	0.54091	0.0915862	0.903334	NA	NA	-0.415901	0.464073
NA	NA	NA	2	0	2	FALSE	59	0.506086	0.890692	NA	NA	NA	NA	0.506086	0.890692
NA	NA	NA	2	0	2	FALSE	125.5	-0.545654	0.645328	-0.472182	0.81244	NA	NA	-0.517231	0.505316
NA	NA	NA	2	0	2	FALSE	303.5	-0.830644	0.393794	-0.317508	0.570824	NA	NA	-0.66518	0.324144
NA	NA	NA	2	0	2	FALSE	212	-0.561739	0.463893	-0.519878	0.681778	NA	NA	-0.548492	0.383531
NA	NA	NA	2	0	2	FALSE	261.667	-0.582022	0.377037	-0.449978	0.511396	0.0214049	0.880787	-0.476424	0.286921
NA	NA	NA	2	0	2	FALSE	176.667	0.29418	0.524186	-0.818301	0.594896	-0.311593	0.801183	-0.215261	0.353048
NA	NA	NA	2	0	2	FALSE	67.5	-0.830075	0.786675	0.0949929	1.24725	NA	NA	-0.566801	0.665381
NA	NA	NA	2	0	2	FALSE	63.5	-0.335498	0.857064	-0.442454	1.19208	NA	NA	-0.371945	0.695877
NA	NA	NA	2	0	2	FALSE	135	-0.543137	0.583585	0.412565	0.830998	NA	NA	-0.227478	0.477582
NA	NA	NA	2	0	2	FALSE	55	NA	NA	0.123767	1.25823	NA	NA	0.123767	1.25823
NA	NA	NA	1	0	1	FALSE	21064.3	-0.0809663	0.116868	-0.104576	0.083029	0.25626	0.320153	-0.0815572	0.0662221
NA	NA	NA	2	0	2	FALSE	115.5	-1.42391	0.68588	-0.76626	0.855163	NA	NA	-1.16647	0.535048
NA	NA	NA	2	0	2	FALSE	63	0.0959427	0.789263	-0.312078	1.32495	NA	NA	-0.0109216	0.678073
NA	NA	NA	2	0	2	FALSE	223.667	0.00591878	0.440113	-0.429263	0.529166	0.0921857	0.810055	-0.132772	0.312229
NA	NA	NA	2	0	2	FALSE	76	0.134409	0.788951	-0.412943	1.07661	NA	NA	-0.0568292	0.636372
NA	NA	NA	2	0	2	FALSE	96	NA	NA	-2.43763	1.03515	NA	NA	-2.43763	1.03515
NA	NA	NA	2	0	2	FALSE	148	-0.0561816	0.49142	0.402234	0.683072	0.212955	1.04956	0.1144	0.372888
NA	NA	NA	2	0	2	FALSE	65	-1.12985	0.866979	-0.474395	1.17385	NA	NA	-0.898506	0.697389
NA	NA	NA	2	0	2	FALSE	64	0.0114238	0.887312	0.328766	1.13031	NA	NA	0.132421	0.697946
NA	NA	NA	2	0	2	FALSE	55	-0.846708	0.976159	-1.8039	1.26756	NA	NA	-1.20305	0.7734
NA	NA	NA	2	0	2	FALSE	183	-0.539223	0.637366	-0.264021	0.599536	NA	NA	-0.393213	0.436697
NA	NA	NA	2	0	2	FALSE	223.333	-0.829931	0.395977	-0.0284603	0.579798	0.610703	0.893979	-0.435089	0.307095
NA	NA	NA	2	0	2	FALSE	76.5	-0.303657	0.77361	-1.16567	1.11407	NA	NA	-0.58409	0.635433
NA	NA	NA	2	0	2	FALSE	205	-0.691692	0.415082	-0.228053	0.580915	0.658133	1.03093	-0.419353	0.320944
NA	NA	NA	2	0	2	FALSE	216.667	-0.272323	0.402134	-0.0638173	0.578889	0.346107	0.910455	-0.140434	0.310471
NA	NA	NA	2	0	2	FALSE	162.5	0.397933	0.753853	-1.73326	0.626144	NA	NA	-0.863218	0.481666
NA	NA	NA	2	0	2	FALSE	115	0.332331	0.630213	0.3588	0.889353	NA	NA	0.34118	0.5142
NA	NA	NA	2	0	2	FALSE	253	-0.182823	0.385557	0.3759	0.513577	0.405814	0.86102	0.062584	0.290286
NA	NA	NA	2	0	2	FALSE	255.667	-0.237378	0.418459	-0.597756	0.469164	0.131159	0.922274	-0.342715	0.295792
NA	NA	NA	2	0	2	FALSE	136.667	-0.29556	0.49069	-0.187233	0.758079	0.685555	1.06634	-0.140331	0.384253
NA	NA	NA	2	0	2	FALSE	201.667	-0.66355	0.47358	-1.30041	0.545331	0.720096	0.926411	-0.722452	0.333582
NA	NA	NA	2	0	2	FALSE	303.667	-0.416163	0.36952	-0.287271	0.476548	-1.01529	0.699058	-0.46397	0.269452
NA	NA	NA	2	0	2	FALSE	148.5	-0.213705	0.664272	-1.8208	0.712498	NA	NA	-0.96103	0.485867
NA	NA	NA	2	0	2	FALSE	236.333	0.135547	0.441148	-1.41288	0.519858	-0.407863	0.767105	-0.495784	0.308049
NA	NA	NA	2	0	2	FALSE	155	0.280164	0.55376	0.882382	0.643489	-0.281998	0.80797	0.362466	0.372474
NA	NA	NA	2	0	2	FALSE	126	-1.21283	0.665402	-0.376314	0.799657	NA	NA	-0.870588	0.511484
NA	NA	NA	2	0	2	FALSE	94	-0.536103	0.696444	0.242265	0.994589	NA	NA	-0.280015	0.570487
NA	NA	NA	2	0	2	FALSE	362.667	-0.759612	0.305058	0.133998	0.505504	-0.437279	0.671555	-0.510048	0.243422
NA	NA	NA	2	0	2	FALSE	151.667	-0.821485	0.521926	-0.351189	0.653686	-0.0182016	0.972721	-0.545658	0.376139
NA	NA	NA	2	0	2	FALSE	195	-0.333981	0.561216	-0.320522	0.613654	NA	NA	-0.327851	0.41414
NA	NA	NA	2	0	2	FALSE	215.333	-0.7645	0.395925	0.297281	0.618217	0.0504097	0.849044	-0.38806	0.310341
NA	NA	NA	2	0	2	FALSE	182.667	-0.358847	0.486678	-0.747806	0.68602	-0.706509	0.681718	-0.54412	0.343026
NA	NA	NA	2	0	2	FALSE	281.333	-0.457556	0.386604	-0.53699	0.466505	0.181393	0.840299	-0.415051	0.280586
NA	NA	NA	2	0	2	FALSE	196.667	-0.508087	0.449149	-1.36575	0.569587	0.155812	1.03252	-0.733197	0.333754
NA	NA	NA	2	0	2	FALSE	63.5	0.222917	0.864371	0.368577	1.16471	NA	NA	0.274649	0.694109
NA	NA	NA	2	0	2	FALSE	107.5	0.0258719	0.608025	0.570993	1.01	NA	NA	0.170877	0.520916
NA	NA	NA	2	0	2	FALSE	283.667	-0.291182	0.37859	-0.167063	0.484533	0.0353627	0.751407	-0.206075	0.27727
NA	NA	NA	2	0	2	FALSE	196.333	-0.0680069	0.488075	-0.451566	0.563639	-0.0153958	0.789991	-0.193515	0.334302
NA	NA	NA	2	0	2	FALSE	94.5	-0.260288	0.629317	-0.096197	1.14242	NA	NA	-0.222087	0.551217
NA	NA	NA	2	0	2	FALSE	142.333	0.0117344	0.528504	-0.0218599	0.694412	0.26871	0.927552	0.0453332	0.383024
NA	NA	NA	2	0	2	FALSE	162	-0.064281	0.531903	0.247824	0.757795	NA	NA	0.0387328	0.435361
NA	NA	NA	2	0	2	FALSE	169.333	-0.419604	0.430259	-0.0737661	0.687282	0.0677324	1.08786	-0.282831	0.345777
NA	NA	NA	2	0	2	FALSE	161.667	-0.246474	0.547091	0.0559751	0.616628	-0.576672	0.835764	-0.20288	0.367541
NA	NA	NA	2	0	2	FALSE	318.333	-0.479164	0.320511	0.356409	0.500487	0.638587	0.860503	-0.157798	0.257537
NA	NA	NA	2	0	2	FALSE	257	-0.0363841	0.39126	-0.438911	0.530881	-0.574353	0.731081	-0.240105	0.28926
NA	NA	NA	2	0	2	FALSE	72	-0.675735	0.820301	NA	NA	NA	NA	-0.675735	0.820301
NA	NA	NA	2	0	2	FALSE	152	0.134143	0.581974	-0.287105	0.737655	NA	NA	-0.0274672	0.456897
NA	NA	NA	2	0	2	FALSE	66.5	-1.11998	0.893778	-0.954292	1.12393	NA	NA	-1.05579	0.699549
NA	NA	NA	1	0	1	FALSE	25192.3	-0.0768287	0.115762	-0.11954	0.0801567	0.154238	0.31748	-0.094961	0.0645252
NA	NA	NA	2	0	2	FALSE	104.5	0.322579	0.692069	0.311598	0.889611	NA	NA	0.318439	0.546242
NA	NA	NA	2	0	2	FALSE	76.5	-0.691869	0.765322	0.0992649	1.11588	NA	NA	-0.438779	0.631144
NA	NA	NA	2	0	2	FALSE	309	-0.310327	0.363711	-0.337932	0.46981	0.265541	0.709815	-0.238007	0.26655
NA	NA	NA	2	0	2	FALSE	80.5	-0.42379	0.821874	-0.92156	0.997973	NA	NA	-0.624955	0.634425
NA	NA	NA	2	0	2	FALSE	194.5	-0.435566	0.495243	-0.739111	0.691352	NA	NA	-0.538505	0.402604
NA	NA	NA	2	0	2	FALSE	96	-0.690773	0.712738	NA	NA	NA	NA	-0.690773	0.712738
NA	NA	NA	2	0	2	FALSE	119	-0.476422	0.550735	0.893039	1.06648	NA	NA	-0.18811	0.48934
NA	NA	NA	2	0	2	FALSE	55	NA	NA	-1.34795	1.28973	NA	NA	-1.34795	1.28973
NA	NA	NA	2	0	2	FALSE	134.5	0.624708	0.616581	-0.13144	0.780823	NA	NA	0.334296	0.483901
NA	NA	NA	2	0	2	FALSE	206.333	0.27709	0.446407	0.0944439	0.567557	0.496671	0.801991	0.253776	0.321458
NA	NA	NA	2	0	2	FALSE	149	-0.327508	0.662446	-0.521448	0.687167	NA	NA	-0.420927	0.47692
NA	NA	NA	2	0	2	FALSE	227.667	-0.101483	0.421163	-0.0305887	0.520504	0.285258	0.905247	-0.0319399	0.307889
NA	NA	NA	2	0	2	FALSE	289.333	0.146327	0.364342	-0.326713	0.493133	0.328925	0.745333	0.0260988	0.272716
NA	NA	NA	2	0	2	FALSE	118.5	-0.582409	0.594082	0.7454	0.940163	NA	NA	-0.203517	0.502219
NA	NA	NA	2	0	2	FALSE	132.5	0.327796	0.638025	0.222514	0.768032	NA	NA	0.284807	0.490773
NA	NA	NA	2	0	2	FALSE	82	-1.45513	0.789397	NA	NA	NA	NA	-1.45513	0.789397
NA	NA	NA	2	0	2	FALSE	415.667	-0.334347	0.322275	0.266943	0.435224	-0.278984	0.546406	-0.150318	0.234038
NA	NA	NA	2	0	2	FALSE	231.333	0.593941	0.414525	0.0655361	0.549131	0.65011	0.755461	0.442041	0.303057
NA	NA	NA	2	0	2	FALSE	78	-0.291387	0.730139	0.594415	1.14559	NA	NA	-0.0355074	0.615716
NA	NA	NA	2	0	2	FALSE	249	-1.10832	0.356259	0.417545	0.596264	0.665411	0.893866	-0.563093	0.28936
NA	NA	NA	2	0	2	FALSE	234.667	0.329336	0.377541	-0.0103385	0.586385	0.566896	0.819806	0.273745	0.29602
NA	NA	NA	2	0	2	FALSE	310.667	-0.426023	0.359777	-0.677153	0.472604	-0.273452	0.722604	-0.484966	0.266143
NA	NA	NA	2	0	2	FALSE	89	NA	NA	-2.2869	1.06254	NA	NA	-2.2869	1.06254
NA	NA	NA	2	0	2	FALSE	138.5	-0.66092	0.624004	-0.608191	0.767125	NA	NA	-0.639924	0.484077
NA	NA	NA	2	0	2	FALSE	328	-0.195201	0.347441	-0.00195928	0.453591	-0.165498	0.734089	-0.128911	0.258199
NA	NA	NA	2	0	1	FALSE	171	-1.20917	0.475767	0.24419	0.878166	NA	NA	-0.879381	0.418319
NA	NA	NA	2	0	2	FALSE	165	-0.506994	0.51444	-0.654116	0.788727	NA	NA	-0.550903	0.430887
NA	NA	NA	2	0	2	FALSE	52.5	0.382055	0.967325	-1.26041	1.28635	NA	NA	-0.211239	0.773121
NA	NA	NA	2	0	2	FALSE	374.333	0.150725	0.35327	-0.466048	0.428914	-0.591322	0.583579	-0.186872	0.247046
NA	NA	NA	2	0	2	FALSE	173	-0.839414	0.526281	-1.20586	0.585515	0.271353	0.927544	-0.810521	0.360616
NA	NA	NA	2	0	2	FALSE	130	0.946836	0.692807	-0.732355	0.636335	-0.858117	0.93435	-0.143708	0.418909
NA	NA	NA	2	0	2	FALSE	61	-1.78646	0.921914	-1.12345	1.22717	NA	NA	-1.54727	0.737089
NA	NA	NA	2	0	2	FALSE	217.667	-0.617748	0.420434	0.16816	0.616101	-0.435603	0.709948	-0.38109	0.311956
NA	NA	NA	2	0	2	FALSE	264.333	-0.659178	0.374329	-0.249956	0.565281	-0.202989	0.686874	-0.477712	0.284145
NA	NA	NA	2	0	2	FALSE	63	-0.855076	0.879772	NA	NA	NA	NA	-0.855076	0.879772
NA	NA	NA	2	0	2	FALSE	279.667	-0.1686	0.369111	0.233619	0.498782	-0.184183	0.771974	-0.0465976	0.276952
NA	NA	NA	2	0	2	FALSE	202.667	-0.29838	0.414149	-0.0794987	0.596031	0.109263	0.958849	-0.18952	0.320539
NA	NA	NA	2	0	2	FALSE	97	NA	NA	-1.03418	0.963817	NA	NA	-1.03418	0.963817
NA	NA	NA	2	0	2	FALSE	90.5	0.123059	0.804787	-1.40053	0.922942	NA	NA	-0.535028	0.606571
NA	NA	NA	2	0	2	FALSE	364	-0.29794	0.331802	0.126252	0.445099	0.170288	0.648817	-0.100838	0.246135
NA	NA	NA	2	0	2	FALSE	257.333	0.31771	0.40258	-0.123428	0.540971	-0.829383	0.660341	-0.0305943	0.290123
NA	NA	NA	2	0	2	FALSE	71.6667	0.55686	0.690863	0.39389	1.26751	-0.818814	0.992484	0.155545	0.517587
NA	NA	NA	2	0	2	FALSE	159	-0.246153	0.48044	-0.39079	0.671945	-0.0983357	0.953311	-0.266773	0.361611
NA	NA	NA	2	0	2	FALSE	186.5	-0.507914	0.539976	-0.529905	0.659974	NA	NA	-0.516732	0.417919
NA	NA	NA	2	0	2	FALSE	266.667	-0.394566	0.377246	-0.0686487	0.495168	0.154746	0.890149	-0.231028	0.284357
NA	NA	NA	2	0	2	FALSE	185.333	0.297386	0.528501	-0.550833	0.561449	0.223593	0.79922	-0.0399945	0.346727
NA	NA	NA	2	0	2	FALSE	53	NA	NA	-1.14261	1.30615	NA	NA	-1.14261	1.30615
NA	NA	NA	2	0	2	FALSE	381	-0.233932	0.344743	-0.669576	0.411267	-0.101029	0.645039	-0.368794	0.244487
NA	NA	NA	2	0	2	FALSE	289.667	-0.00657867	0.405026	-0.32449	0.492459	-0.295746	0.611747	-0.168204	0.278516
NA	NA	NA	2	0	2	FALSE	135.5	-0.574983	0.598169	-0.118069	0.809155	NA	NA	-0.413521	0.481005
NA	NA	NA	2	0	2	FALSE	263	-0.514893	0.43321	-0.144526	0.585976	NA	NA	-0.384005	0.348349
NA	NA	NA	2	0	2	FALSE	74.5	-0.0827839	0.698394	-0.0932317	1.30893	NA	NA	-0.0850991	0.616172
NA	NA	NA	1	0	1	FALSE	32620	-0.130949	0.11423	-0.0492013	0.0768914	0.0643889	0.315178	-0.0692193	0.0625191
NA	NA	NA	2	0	2	FALSE	114	-0.0829147	0.589414	0.0990733	0.990034	NA	NA	-0.0352908	0.506455
NA	NA	NA	2	0	2	FALSE	73	NA	NA	-0.847898	1.10606	NA	NA	-0.847898	1.10606
NA	NA	NA	2	0	2	FALSE	303	0.134257	0.352164	0.142025	0.491642	0.0558854	0.716948	0.12575	0.26588
NA	NA	NA	2	0	2	FALSE	55	NA	NA	-2.0453	1.32961	NA	NA	-2.0453	1.32961
NA	NA	NA	2	0	2	FALSE	77	-0.244206	0.679926	0.876313	1.05962	-0.336049	1.09024	-0.00782875	0.506692
NA	NA	NA	2	0	2	FALSE	93	-1.29691	0.661896	-0.184495	1.11872	NA	NA	-1.00847	0.569657
NA	NA	NA	2	0	2	FALSE	238.667	-0.819014	0.425058	-0.163421	0.494938	-0.0203562	0.934501	-0.485361	0.304825
NA	NA	NA	2	0	2	FALSE	102	-0.190329	0.621334	-0.470035	0.86912	-0.76759	0.977861	-0.386699	0.449016
NA	NA	NA	2	0	2	FALSE	55	NA	NA	-2.24719	1.34695	NA	NA	-2.24719	1.34695
NA	NA	NA	2	0	2	FALSE	187	-0.441243	0.458273	0.0393375	0.802096	NA	NA	-0.322972	0.397907
NA	NA	NA	2	0	2	FALSE	100	-0.574203	0.696964	NA	NA	NA	NA	-0.574203	0.696964
NA	NA	NA	2	0	2	FALSE	198.333	-0.164023	0.455486	-0.415983	0.547216	0.04353	1.00881	-0.233753	0.330732
NA	NA	NA	2	0	2	FALSE	263	-0.302331	0.405933	-0.64514	0.493949	0.644564	0.75547	-0.281018	0.28965
NA	NA	NA	2	0	2	FALSE	130	-0.243417	0.596931	-0.0181679	0.8402	NA	NA	-0.167859	0.486621
NA	NA	NA	2	0	2	FALSE	94	NA	NA	-2.08905	1.02049	NA	NA	-2.08905	1.02049
NA	NA	NA	2	0	2	FALSE	316.333	-0.0702197	0.365589	-0.154042	0.450643	0.536113	0.720427	-0.01751	0.26414
NA	NA	NA	2	0	2	FALSE	338	-0.0638619	0.336224	-0.170317	0.461176	-0.36939	0.707522	-0.135322	0.253629
NA	NA	NA	2	0	2	FALSE	119.5	0.282188	0.737393	-1.047	0.771064	NA	NA	-0.352752	0.532922
NA	NA	NA	2	0	2	FALSE	155	-0.143845	0.594012	-0.909474	0.720892	NA	NA	-0.453463	0.458431
NA	NA	NA	2	0	2	FALSE	433	0.00397317	0.306378	0.0268117	0.443022	0.033478	0.53905	0.0153283	0.228278
NA	NA	NA	2	0	2	FALSE	340.667	0.208949	0.368541	-0.153319	0.409337	1.09332	0.752147	0.169289	0.257357
NA	NA	NA	2	0	2	FALSE	63.5	-0.00675855	0.887498	-1.93182	1.19734	NA	NA	-0.689378	0.71299
NA	NA	NA	2	0	2	FALSE	205.667	0.0916658	0.473286	-0.786905	0.554961	-0.269017	0.781452	-0.27665	0.327056
NA	NA	NA	2	0	2	FALSE	313.333	-0.0813021	0.368722	-0.478399	0.444438	0.435545	0.767212	-0.16151	0.266153
NA	NA	NA	2	0	2	FALSE	457.667	-0.465612	0.302288	-0.555625	0.389476	0.254782	0.626345	-0.403729	0.223134
NA	NA	NA	2	0	2	FALSE	112	-0.955606	0.648926	-0.32676	0.911239	NA	NA	-0.744005	0.52859
NA	NA	NA	2	0	1	FALSE	71	-0.765605	0.749169	1.23608	1.25178	NA	NA	-0.237718	0.642838
NA	NA	NA	2	0	2	FALSE	81	0.0769628	0.76515	NA	NA	NA	NA	0.0769628	0.76515
NA	NA	NA	2	0	2	FALSE	117	0.863256	0.646668	0.123767	0.849517	NA	NA	0.59196	0.51455
NA	NA	NA	2	0	2	FALSE	102	0.36042	0.66921	-1.58406	0.975047	NA	NA	-0.262236	0.551757
NA	NA	NA	2	0	2	FALSE	88	-2.15962	0.718061	-1.4179	1.17147	NA	NA	-1.95705	0.612205
NA	NA	NA	2	0	2	FALSE	150	0.0317878	0.59914	0.185922	0.725666	NA	NA	0.0942674	0.462015
NA	NA	NA	2	0	2	FALSE	112	-0.983251	0.721804	0.0200903	0.823577	NA	NA	-0.547372	0.542829
NA	NA	NA	2	0	2	FALSE	166	-0.466903	0.571408	-0.409646	0.697267	NA	NA	-0.443899	0.441961
NA	NA	NA	2	0	2	FALSE	89	NA	NA	0.293619	0.988673	NA	NA	0.293619	0.988673
NA	NA	NA	2	0	2	FALSE	80	-1.89475	0.818955	NA	NA	NA	NA	-1.89475	0.818955
NA	NA	NA	2	0	2	FALSE	156.333	-0.172094	0.467718	0.0244922	0.703798	-0.364345	0.961236	-0.147485	0.361024
NA	NA	NA	2	0	2	FALSE	108.333	0.473797	0.610152	-0.372931	0.826888	-0.293305	0.948047	0.0762011	0.435969
NA	NA	NA	2	0	2	FALSE	67	-0.00847048	0.894892	-1.13695	1.09834	NA	NA	-0.458716	0.693768
NA	NA	NA	2	0	2	FALSE	66	-0.396123	0.957625	-1.00495	1.0602	NA	NA	-0.669666	0.710649
NA	NA	NA	2	0	2	FALSE	186.5	0.0804964	0.466348	0.0110608	0.771867	NA	NA	0.061928	0.399152
NA	NA	NA	2	0	2	FALSE	122	-0.371316	0.671891	-0.289002	0.801726	NA	NA	-0.337356	0.514963
NA	NA	NA	2	0	2	FALSE	208.5	-0.704349	0.489836	-0.0576267	0.650133	NA	NA	-0.470164	0.391222
NA	NA	NA	2	0	2	FALSE	157	-0.394551	0.554922	-0.33316	0.754415	NA	NA	-0.372997	0.447015
NA	NA	NA	2	0	2	FALSE	76	NA	NA	-0.290099	1.07501	NA	NA	-0.290099	1.07501
NA	NA	NA	2	0	2	FALSE	119.5	-0.653772	0.63124	-0.993453	0.880893	NA	NA	-0.76902	0.513101
NA	NA	NA	2	0	2	FALSE	61	NA	NA	-1.54801	1.23324	NA	NA	-1.54801	1.23324
NA	NA	NA	1	0	1	FALSE	14503.7	-0.142532	0.119735	-0.128913	0.0916089	0.326669	0.326215	-0.112115	0.0710118
NA	NA	NA	2	0	2	FALSE	146.5	0.123059	0.574295	0.432196	0.769621	NA	NA	0.233626	0.460273
NA	NA	NA	2	0	2	FALSE	63	-0.891444	0.803056	0.0592603	1.32017	NA	NA	-0.63467	0.68609
NA	NA	NA	2	0	2	FALSE	90	0.45649	0.869519	-0.496725	0.865764	NA	NA	-0.0221801	0.613511
NA	NA	NA	2	0	2	FALSE	62	0.510851	0.869179	NA	NA	NA	NA	0.510851	0.869179
NA	NA	NA	2	0	2	FALSE	56	-0.485979	0.924726	NA	NA	NA	NA	-0.485979	0.924726
NA	NA	NA	2	0	2	FALSE	54	-0.567394	0.942938	NA	NA	NA	NA	-0.567394	0.942938
NA	NA	NA	2	0	2	FALSE	95.5	-0.631161	0.808559	-0.49735	0.869445	NA	NA	-0.569105	0.592093
NA	NA	NA	2	0	2	FALSE	133.667	0.050919	0.671152	-1.65165	0.664708	0.0877705	0.871075	-0.604945	0.415184
NA	NA	NA	2	0	2	FALSE	107.667	0.290411	0.611027	0.0764318	0.784834	-0.182773	1.06049	0.14244	0.438906
NA	NA	NA	2	0	2	FALSE	172	-1.02999	0.483122	-0.216189	0.838442	NA	NA	-0.82714	0.418602
NA	NA	NA	2	0	2	FALSE	142.5	-0.784979	0.525578	0.511119	0.91375	NA	NA	-0.462774	0.45559
NA	NA	NA	2	0	2	FALSE	66.5	-1.0359	0.929051	-0.278601	1.07487	NA	NA	-0.712065	0.702884
NA	NA	NA	2	0	2	FALSE	161	-0.357991	0.495783	-0.0636675	0.669603	0.357798	0.852375	-0.144098	0.360961
NA	NA	NA	2	0	2	FALSE	175	0.60297	0.516059	-0.420159	0.723483	NA	NA	0.257951	0.420131
NA	NA	NA	2	0	2	FALSE	153.5	-0.375631	0.553081	-0.385846	0.775033	NA	NA	-0.379078	0.450202
NA	NA	NA	2	0	2	FALSE	164.333	-0.131015	0.427743	0.0231428	0.724414	-0.171465	1.06043	-0.0998072	0.347936
NA	NA	NA	2	0	2	FALSE	176.333	0.580008	0.517501	0.0901423	0.580327	0.161631	0.844479	0.328178	0.351243
NA	NA	NA	2	0	2	FALSE	82	-2.23789	0.831169	NA	NA	NA	NA	-2.23789	0.831169
NA	NA	NA	2	0	2	FALSE	217	-0.646524	0.482701	0.15706	0.632642	NA	NA	-0.350844	0.383754
NA	NA	NA	2	0	2	FALSE	106	-0.926049	0.709763	-0.975956	0.888205	NA	NA	-0.945498	0.554476
NA	NA	NA	2	0	2	FALSE	114	-0.686	0.655424	NA	NA	NA	NA	-0.686	0.655424
NA	NA	NA	2	0	2	FALSE	248.5	-0.443797	0.415093	0.104543	0.657132	NA	NA	-0.287405	0.350941
NA	NA	NA	2	0	2	FALSE	99.5	-0.130159	0.678864	-0.166219	0.960641	NA	NA	-0.142169	0.554402
NA	NA	NA	2	0	2	FALSE	197.5	0.0757177	0.471331	0.0561146	0.709609	NA	NA	0.0697167	0.392615
NA	NA	NA	2	0	2	FALSE	107.5	-0.285308	0.597297	1.08853	1.04544	NA	NA	0.0527818	0.518621
NA	NA	NA	2	0	2	FALSE	68	NA	NA	-0.440999	1.13839	NA	NA	-0.440999	1.13839
NA	NA	NA	2	0	2	FALSE	200	0.170427	0.559475	-0.696616	0.603088	NA	NA	-0.230614	0.410161
NA	NA	NA	2	0	2	FALSE	178	-0.261476	0.575091	-0.753122	0.654419	NA	NA	-0.475709	0.431989
NA	NA	NA	2	0	2	FALSE	70.5	0.214548	0.885448	-0.127393	1.03964	NA	NA	0.0707909	0.674096
NA	NA	NA	2	0	2	FALSE	104	0.211826	0.633441	-0.194836	0.992656	NA	NA	0.0941491	0.533983
NA	NA	NA	2	0	2	FALSE	146	0.223816	0.587501	-1.0536	0.768676	NA	NA	-0.247231	0.466777
NA	NA	NA	2	0	2	FALSE	203	0.0235387	0.489832	-0.564714	0.66354	NA	NA	-0.183957	0.394084
NA	NA	NA	2	0	2	FALSE	85.5	0.418477	0.831143	-0.772454	0.930429	NA	NA	-0.110077	0.619848
NA	NA	NA	2	0	2	FALSE	178.5	-0.399168	0.51612	0.339111	0.712269	NA	NA	-0.144985	0.417933
NA	NA	NA	2	0	2	FALSE	155.5	0.375186	0.59939	-0.185894	0.703199	NA	NA	0.139079	0.456163
NA	NA	NA	2	0	2	FALSE	89	-0.884929	0.695262	-1.12345	1.09074	NA	NA	-0.953842	0.586284
NA	NA	NA	2	0	2	FALSE	140	-0.721545	0.624843	-1.2939	0.771078	NA	NA	-0.948412	0.48546
NA	NA	NA	1	0	1	FALSE	14818.7	-0.134354	0.119052	-0.120381	0.090706	0.519103	0.331325	-0.0963288	0.0704983
NA	NA	NA	2	0	2	FALSE	58	NA	NA	-1.35666	1.25635	NA	NA	-1.35666	1.25635
NA	NA	NA	2	0	2	FALSE	59	NA	NA	-1.21254	1.24042	NA	NA	-1.21254	1.24042
NA	NA	NA	2	0	2	FALSE	257	-0.585413	0.433029	-0.548724	0.604136	NA	NA	-0.572961	0.351955
NA	NA	NA	2	0	2	FALSE	174	-0.0524449	0.630094	-0.115831	0.622921	NA	NA	-0.0845008	0.442986
NA	NA	NA	2	0	2	FALSE	52	-0.224272	0.955052	NA	NA	NA	NA	-0.224272	0.955052
NA	NA	NA	2	0	2	FALSE	91.5	-0.441243	0.752685	-1.27854	0.96504	NA	NA	-0.757937	0.593508
NA	NA	NA	2	0	2	FALSE	151	-0.909626	0.580781	0.093045	0.753734	NA	NA	-0.53609	0.46005
NA	NA	NA	2	0	2	FALSE	127.333	-0.324048	0.510267	0.613788	0.779518	0.391206	1.08656	0.0153013	0.397359
NA	NA	NA	2	0	2	FALSE	71	NA	NA	0.548213	1.10489	NA	NA	0.548213	1.10489
NA	NA	NA	2	0	2	FALSE	151	0.278022	0.531538	0.0486805	0.817108	NA	NA	0.20983	0.445561
NA	NA	NA	2	0	2	FALSE	184	-0.115409	0.598029	-0.506983	0.617721	NA	NA	-0.304855	0.429664
NA	NA	NA	2	0	2	FALSE	99	-0.956901	0.641086	-0.00518617	1.06502	NA	NA	-0.703774	0.549254
NA	NA	NA	2	0	2	FALSE	53.5	-0.311092	0.974991	0.129326	1.23596	NA	NA	-0.142154	0.765485
NA	NA	NA	2	0	2	FALSE	200.333	-0.15645	0.42788	-0.193508	0.628912	-0.291601	0.784686	-0.189025	0.322507
NA	NA	NA	2	0	2	FALSE	265.5	-0.529442	0.390247	0.360527	0.670902	NA	NA	-0.30445	0.33733
NA	NA	NA	2	0	2	FALSE	114.5	-0.307996	0.562741	0.851374	1.07371	NA	NA	-0.0581563	0.498432
NA	NA	NA	2	0	2	FALSE	51	-0.822015	0.975536	NA	NA	NA	NA	-0.822015	0.975536
NA	NA	NA	2	0	2	FALSE	256.5	-0.84423	0.441682	-1.33204	0.605883	NA	NA	-1.01351	0.356913
NA	NA	NA	2	0	2	FALSE	210.5	-0.247622	0.512285	-0.0863519	0.613456	NA	NA	-0.181364	0.39321
NA	NA	NA	2	0	2	FALSE	52	NA	NA	-1.98887	1.36293	NA	NA	-1.98887	1.36293
NA	NA	NA	2	0	2	FALSE	51	-0.872026	0.976814	NA	NA	NA	NA	-0.872026	0.976814
NA	NA	NA	2	0	2	FALSE	50	NA	NA	0.357961	1.3174	NA	NA	0.357961	1.3174
NA	NA	NA	2	0	2	FALSE	77	-1.91209	0.851948	-2.11023	1.10732	NA	NA	-1.98577	0.675227
NA	NA	NA	2	0	2	FALSE	91	NA	NA	-2.17492	1.04276	NA	NA	-2.17492	1.04276
NA	NA	NA	2	0	2	FALSE	51	-1.82754	1.01785	NA	NA	NA	NA	-1.82754	1.01785
NA	NA	NA	2	0	2	FALSE	65	NA	NA	-0.0986965	1.15984	NA	NA	-0.0986965	1.15984
NA	NA	NA	1	0	1	FALSE	4019.67	-0.119709	0.145379	-0.16827	0.140439	0.347697	0.36301	-0.109436	0.0973099
NA	NA	NA	2	0	2	FALSE	62	-0.95516	0.951845	-1.97589	1.17427	NA	NA	-1.3599	0.739432
NA	NA	NA	2	0	2	FALSE	53	-1.10832	0.965262	NA	NA	NA	NA	-1.10832	0.965262
NA	NA	NA	2	0	2	FALSE	65	0.321717	0.850443	NA	NA	NA	NA	0.321717	0.850443
NA	NA	NA	2	0	2	FALSE	53	NA	NA	0.117755	1.28175	NA	NA	0.117755	1.28175
NA	NA	NA	2	0	2	FALSE	64.5	-0.500221	0.933226	-0.671195	1.09511	NA	NA	-0.572149	0.7103
NA	NA	NA	2	0	2	FALSE	54	NA	NA	-3.33401	1.53419	NA	NA	-3.33401	1.53419
NA	NA	NA	2	0	2	FALSE	81	-0.270823	0.768532	NA	NA	NA	NA	-0.270823	0.768532
NA	NA	NA	2	0	2	FALSE	73	-0.082037	0.806653	NA	NA	NA	NA	-0.082037	0.806653
NA	NA	NA	2	0	2	FALSE	73	-1.42849	0.834756	NA	NA	NA	NA	-1.42849	0.834756
NA	NA	NA	2	0	2	FALSE	371.667	-0.051299	0.336177	-0.978749	0.445885	-0.266928	0.612824	-0.368034	0.245878
NA	NA	NA	2	0	2	FALSE	142	-0.497505	0.473051	0.20916	0.78406	-0.179608	0.99481	-0.29053	0.375138
NA	NA	NA	2	0	2	FALSE	84	-1.39222	0.875785	-2.22873	0.988704	NA	NA	-1.76	0.655577
NA	NA	NA	2	0	2	FALSE	333	-0.404948	0.344534	0.0768149	0.467933	-0.241605	0.670807	-0.236467	0.256379
NA	NA	NA	2	0	2	FALSE	284	-0.170016	0.388115	1.3279	0.507239	-0.458592	0.637702	0.223709	0.277517
NA	NA	NA	2	0	2	FALSE	91	0.153101	0.788804	-1.485	0.93425	NA	NA	-0.528654	0.602707
NA	NA	NA	2	0	2	FALSE	345.333	-0.358327	0.353085	-0.305	0.416539	0.547306	0.78852	-0.243736	0.254881
NA	NA	NA	2	0	2	FALSE	242	-0.374262	0.385054	0.198904	0.559087	-0.497596	0.802164	-0.231453	0.294911
NA	NA	NA	2	0	2	FALSE	129	0.233092	0.657974	-0.143487	0.770356	NA	NA	0.0742498	0.500319
NA	NA	NA	2	0	2	FALSE	462.667	0.411136	0.316577	-0.2911	0.39402	0.198592	0.533719	0.146739	0.224001
NA	NA	NA	2	0	2	FALSE	428.667	0.0596888	0.303205	0.136919	0.477101	-0.361961	0.517708	-0.00524796	0.229405
NA	NA	NA	2	0	2	FALSE	105	-0.437158	0.536264	0.890828	1.01461	-0.0972381	1.00183	-0.138045	0.428548
NA	NA	NA	2	0	2	FALSE	141.333	0.11807	0.507465	-0.316631	0.712188	-0.526044	0.997105	-0.101285	0.381786
NA	NA	NA	2	0	2	FALSE	261	-1.26603	0.428684	-0.624185	0.616177	NA	NA	-1.05669	0.351898
NA	NA	NA	2	0	2	FALSE	370.333	-0.0435989	0.3181	-0.196221	0.445868	-0.155261	0.694437	-0.102426	0.242632
NA	NA	NA	2	0	2	FALSE	254.667	-1.03685	0.379679	0.0179125	0.557903	-0.307909	0.758138	-0.645166	0.290013
NA	NA	NA	2	0	2	FALSE	84.5	-0.85775	0.678746	0.711128	1.18124	NA	NA	-0.468331	0.58851
NA	NA	NA	2	0	2	FALSE	490	-0.240616	0.276825	0.0989703	0.413017	-0.365598	0.581857	-0.166454	0.213856
NA	NA	NA	2	0	2	FALSE	270.333	-0.115897	0.393832	0.111131	0.502021	-0.242485	0.707015	-0.0637392	0.283801
NA	NA	NA	2	0	2	FALSE	126	0.100946	0.609812	-0.370408	0.84668	NA	NA	-0.0600505	0.494828
NA	NA	NA	2	0	2	FALSE	227.333	-0.653523	0.407188	-0.310116	0.534234	0.569771	0.9847	-0.420253	0.307636
NA	NA	NA	2	0	2	FALSE	61	-0.183908	0.830397	-0.78765	1.29605	NA	NA	-0.35962	0.699193
NA	NA	NA	1	0	1	FALSE	37911	-0.020427	0.113701	-0.056931	0.0748899	0.017888	0.313892	-0.043451	0.0613367
NA	NA	NA	2	0	2	FALSE	151	-0.127101	0.606881	-0.37449	0.718859	NA	NA	-0.230048	0.463724
NA	NA	NA	2	0	2	FALSE	54.5	0.0299619	0.951961	0.149448	1.23577	NA	NA	0.0744605	0.754145
NA	NA	NA	2	0	2	FALSE	362.333	-0.127604	0.356672	-0.553988	0.419863	0.14267	0.642983	-0.238246	0.250375
NA	NA	NA	2	0	2	FALSE	151.5	-0.55321	0.60218	-0.781518	0.729656	NA	NA	-0.64571	0.464439
NA	NA	NA	2	0	2	FALSE	79	NA	NA	-1.18923	1.07173	NA	NA	-1.18923	1.07173
NA	NA	NA	2	0	2	FALSE	320.333	0.00262573	0.375293	-0.311838	0.445937	0.211316	0.674775	-0.0757686	0.264213
NA	NA	NA	2	0	2	FALSE	139.333	-1.39122	0.510972	0.46222	0.844204	-0.276045	0.815095	-0.756173	0.385232
NA	NA	NA	2	0	2	FALSE	147.333	-0.359784	0.467033	-0.545374	0.742381	0.602102	1.0573	-0.287981	0.370278
NA	NA	NA	2	0	2	FALSE	61	0.0353181	0.909772	-0.818661	1.17129	NA	NA	-0.286023	0.718497
NA	NA	NA	2	0	2	FALSE	221	0.0264715	0.417122	-0.23744	0.526346	0.847835	1.03052	0.00907322	0.311609
NA	NA	NA	2	0	2	FALSE	287.667	0.213769	0.406622	-0.579837	0.489543	-0.640842	0.623957	-0.216792	0.279625
NA	NA	NA	2	0	2	FALSE	197.5	0.0815421	0.503857	0.372541	0.655942	NA	NA	0.189528	0.399579
NA	NA	NA	2	0	2	FALSE	78	NA	NA	-2.15417	1.12451	NA	NA	-2.15417	1.12451
NA	NA	NA	2	0	2	FALSE	322.667	0.136539	0.333929	0.577415	0.505602	0.0661559	0.661557	0.239662	0.256794
NA	NA	NA	2	0	2	FALSE	413	0.11832	0.311623	-0.268184	0.400399	0.644342	0.704853	0.0454254	0.232194
NA	NA	NA	2	0	2	FALSE	149.667	0.507493	0.603209	-0.297141	0.614786	0.426898	0.860968	0.175657	0.385097
NA	NA	NA	2	0	2	FALSE	167.333	-0.265261	0.4838	-0.477436	0.664354	0.149666	0.836351	-0.251145	0.35427
NA	NA	NA	2	0	2	FALSE	75	-0.651771	0.868745	-0.498854	1.01346	NA	NA	-0.587	0.659579
NA	NA	NA	2	0	2	FALSE	524	-0.260867	0.291247	-0.746048	0.395867	-0.663334	0.503019	-0.472718	0.21261
NA	NA	NA	2	0	2	FALSE	378	0.0316883	0.34403	-0.638254	0.406632	0.215018	0.676542	-0.187183	0.244839
NA	NA	NA	2	0	2	FALSE	91	NA	NA	-2.05642	1.03508	NA	NA	-2.05642	1.03508
NA	NA	NA	2	0	2	FALSE	244.333	-0.859287	0.410945	-0.455687	0.567691	-1.00232	0.680081	-0.774981	0.298986
NA	NA	NA	2	0	2	FALSE	58	0.228384	0.907988	-2.31782	1.30723	NA	NA	-0.60026	0.745743
NA	NA	NA	3	0	3	FALSE	61	-3.32834	1.12059	NA	NA	NA	NA	-3.32834	1.12059
NA	NA	NA	2	0	2	FALSE	420.667	-0.0447065	0.321388	-0.0925479	0.392568	0.401568	0.641055	-0.00302043	0.231846
NA	NA	NA	2	0	2	FALSE	465.333	0.0705653	0.301155	-0.190127	0.378005	0.205381	0.633059	-0.00195302	0.220756
NA	NA	NA	2	0	2	FALSE	88	0.0437153	0.653469	-0.144091	0.927029	-0.0145611	1.08827	-0.0178377	0.479475
NA	NA	NA	2	0	2	FALSE	210.333	-0.41684	0.445095	-0.13364	0.59515	-0.819474	0.723225	-0.413797	0.319719
NA	NA	NA	2	0	2	FALSE	133.667	-0.133758	0.568525	-0.351537	0.696767	0.37716	0.939096	-0.112962	0.398803
NA	NA	NA	2	0	2	FALSE	181.667	-0.100968	0.468278	0.115826	0.603547	-0.378643	0.88758	-0.0726672	0.341496
NA	NA	NA	2	0	2	FALSE	194.667	0.189469	0.405467	1.92871	0.624562	0.855505	1.01421	0.720349	0.32244
NA	NA	NA	2	0	2	FALSE	91.5	-1.1961	0.619315	0.875681	1.30126	NA	NA	-0.813485	0.559211
NA	NA	NA	2	0	2	FALSE	238.333	-0.69563	0.401574	0.0155873	0.588535	-0.760035	0.695261	-0.523531	0.299384
NA	NA	NA	2	0	2	FALSE	173	0.77765	0.55704	-0.356146	0.595402	-0.165959	0.754805	0.155184	0.358084
NA	NA	NA	2	0	2	FALSE	76	-1.16078	0.722218	0.116174	1.24704	NA	NA	-0.840052	0.624973
NA	NA	NA	2	0	2	FALSE	92	-0.258157	0.664696	-0.180265	0.885188	-1.04109	1.05079	-0.395308	0.474298
NA	NA	NA	2	0	2	FALSE	110.5	-0.903005	0.653381	-0.33457	0.915633	NA	NA	-0.711216	0.531854
NA	NA	NA	2	0	2	FALSE	178	-0.557024	0.488358	-0.623817	0.608532	-0.382666	0.864079	-0.550568	0.34852
NA	NA	NA	2	0	2	FALSE	150	0.0344696	0.605717	-1.46793	0.740412	NA	NA	-0.567891	0.468823
NA	NA	NA	2	0	2	FALSE	53	-0.767391	0.955887	NA	NA	NA	NA	-0.767391	0.955887
NA	NA	NA	2	0	2	FALSE	267.333	-0.203375	0.392605	-0.603293	0.527198	0.00239549	0.675283	-0.283811	0.285382
NA	NA	NA	2	0	2	FALSE	214.333	-0.500814	0.449091	0.137402	0.544247	-0.0267823	0.810459	-0.209002	0.318517
NA	NA	NA	2	0	2	FALSE	78	0.819511	0.800658	-0.438289	1.0307	NA	NA	0.346153	0.632298
NA	NA	NA	2	0	2	FALSE	169.5	-0.426248	0.59237	-1.22945	0.676014	NA	NA	-0.77511	0.445524
NA	NA	NA	1	0	1	FALSE	20265	-0.0637539	0.117333	-0.132771	0.0846218	-0.00875495	0.318459	-0.104699	0.0670936
NA	NA	NA	2	0	2	FALSE	89.5	-0.910787	0.751976	-1.8208	1.01657	NA	NA	-1.23263	0.604552
NA	NA	NA	2	0	2	FALSE	52	NA	NA	0.125802	1.29391	NA	NA	0.125802	1.29391
NA	NA	NA	2	0	2	FALSE	267.333	0.102526	0.367116	0.427384	0.562256	-0.645813	0.685053	0.0579302	0.280453
NA	NA	NA	2	0	2	FALSE	56	-2.06416	0.988394	NA	NA	NA	NA	-2.06416	0.988394
NA	NA	NA	2	0	2	FALSE	138	-0.166548	0.717251	-0.0236806	0.692538	NA	NA	-0.0926107	0.498206
NA	NA	NA	2	0	2	FALSE	213	-0.055066	0.533332	-0.303659	0.589236	NA	NA	-0.167013	0.395413
NA	NA	NA	2	0	2	FALSE	78.5	0.925911	0.881221	-0.281434	0.951894	NA	NA	0.368717	0.646661
NA	NA	NA	2	0	2	FALSE	170	-0.875696	0.545926	-0.369239	0.716735	NA	NA	-0.689748	0.434293
NA	NA	NA	2	0	2	FALSE	119.333	-0.317644	0.552576	-0.461901	0.786501	-0.110696	1.04229	-0.324992	0.414794
NA	NA	NA	2	0	2	FALSE	182.667	-0.389105	0.482553	-0.457293	0.582499	-0.155887	0.917855	-0.380104	0.344445
NA	NA	NA	2	0	2	FALSE	81	-1.07377	0.751421	0.473767	1.08275	NA	NA	-0.570717	0.617325
NA	NA	NA	2	0	2	FALSE	284	-0.164603	0.479909	-0.417604	0.501848	NA	NA	-0.285453	0.346843
NA	NA	NA	2	0	2	FALSE	225	-0.955574	0.372381	-0.203347	0.619424	0.491823	0.97093	-0.634218	0.30319
NA	NA	NA	2	0	2	FALSE	110	-0.0551959	0.608592	-0.664664	0.993245	NA	NA	-0.221556	0.518926
NA	NA	NA	2	0	2	FALSE	159	-0.112097	0.59377	-0.0126248	0.696257	NA	NA	-0.0702138	0.451791
NA	NA	NA	2	0	2	FALSE	347.667	-0.421081	0.336852	-0.114567	0.474514	-0.290297	0.625126	-0.313831	0.251473
NA	NA	NA	3	0	3	FALSE	56	NA	NA	-3.08117	1.4511	NA	NA	-3.08117	1.4511
NA	NA	NA	2	0	2	FALSE	201.333	0.232627	0.455348	1.01029	0.572207	-0.0522855	0.796719	0.43641	0.325257
NA	NA	NA	2	0	2	FALSE	153	-1.07602	0.534065	0.193675	0.825665	NA	NA	-0.701488	0.448432
NA	NA	NA	2	0	2	FALSE	114.333	0.00147344	0.687512	-0.197944	0.730261	-0.693597	0.899868	-0.234342	0.437448
NA	NA	NA	2	0	2	FALSE	182.5	-0.289412	0.659151	-1.84485	0.614496	NA	NA	-1.1216	0.449472
NA	NA	NA	2	0	2	FALSE	62.5	0.617453	0.824065	-1.51357	1.28535	NA	NA	-0.00331475	0.693733
NA	NA	NA	2	0	2	FALSE	62	NA	NA	-0.86701	1.20034	NA	NA	-0.86701	1.20034
NA	NA	NA	2	0	2	FALSE	177	0.517469	0.487749	0.400582	0.621878	-0.287215	0.797685	0.330062	0.345841
NA	NA	NA	2	0	2	FALSE	112.667	1.15147	0.769126	-1.76145	0.724038	0.309756	0.889664	-0.210265	0.453542
NA	NA	NA	2	0	2	FALSE	108.5	-0.428959	0.735783	-0.937404	0.837777	NA	NA	-0.650364	0.55284
NA	NA	NA	2	0	2	FALSE	125	-0.786083	0.611848	0.317094	0.859046	NA	NA	-0.414801	0.498363
NA	NA	NA	2	0	2	FALSE	180.5	-0.149403	0.563246	-0.141514	0.650645	NA	NA	-0.146024	0.425848
NA	NA	NA	2	0	2	FALSE	130.667	0.501365	0.681143	0.0328706	0.608966	0.052916	1.05925	0.211803	0.417275
NA	NA	NA	2	0	2	FALSE	151	0.0585081	0.570924	-0.623999	0.630975	0.870302	0.87386	-0.0360184	0.380992
NA	NA	NA	2	0	2	FALSE	137	0.589038	0.594183	-0.529667	0.694618	-0.267056	0.830084	0.0288	0.396641
NA	NA	NA	2	0	2	FALSE	58.5	0.422091	0.90651	-1.05852	1.22522	NA	NA	-0.10169	0.728735
NA	NA	NA	2	0	2	FALSE	152	0.0980434	0.644758	-0.550599	0.685648	NA	NA	-0.20636	0.469704
NA	NA	NA	1	0	1	FALSE	15090	-0.0709274	0.120052	-0.0444177	0.0903038	0.0369443	0.32259	-0.0496628	0.0704257
NA	NA	NA	2	0	2	FALSE	75	-0.913917	0.808792	NA	NA	NA	NA	-0.913917	0.808792
NA	NA	NA	2	0	2	FALSE	51	NA	NA	-1.96934	1.37471	NA	NA	-1.96934	1.37471
NA	NA	NA	2	0	2	FALSE	219.333	0.00898489	0.460028	-0.262144	0.511727	-0.167487	0.85419	-0.119839	0.317587
NA	NA	NA	2	0	2	FALSE	118	0.147829	0.664408	-0.684564	0.833809	NA	NA	-0.175438	0.519617
NA	NA	NA	2	0	2	FALSE	80	-1.72769	0.810392	NA	NA	NA	NA	-1.72769	0.810392
NA	NA	NA	2	0	2	FALSE	116.5	0.409491	0.657008	-0.0542515	0.84386	NA	NA	0.234472	0.518411
NA	NA	NA	2	0	2	FALSE	55	NA	NA	-1.21934	1.28486	NA	NA	-1.21934	1.28486
NA	NA	NA	2	0	2	FALSE	111	-0.803687	0.577317	-0.00447966	1.09371	NA	NA	-0.62953	0.510554
NA	NA	NA	2	0	2	FALSE	117.667	-0.365606	0.637999	0.17607	0.778813	-0.431055	0.838858	-0.220842	0.425378
NA	NA	NA	2	0	2	FALSE	84	0.119366	0.644617	0.992068	1.27602	NA	NA	0.296801	0.575367
NA	NA	NA	2	0	2	FALSE	57	-2.34423	1.00435	NA	NA	NA	NA	-2.34423	1.00435
NA	NA	NA	2	0	2	FALSE	142.667	-0.951674	0.490625	-0.041943	0.747386	-0.86633	1.00784	-0.704505	0.379894
NA	NA	NA	2	0	2	FALSE	165.667	-0.908058	0.441614	-0.121242	0.702749	-0.16946	1.0341	-0.625663	0.351633
NA	NA	NA	2	0	2	FALSE	128	0.202852	0.609205	-1.01113	0.84241	NA	NA	-0.214018	0.493648
NA	NA	NA	2	0	2	FALSE	62	-1.38652	0.850586	-0.544592	1.27892	NA	NA	-1.12832	0.708248
NA	NA	NA	2	0	2	FALSE	309.667	-0.795984	0.360325	0.104824	0.492444	-0.274218	0.662559	-0.448331	0.266276
NA	NA	NA	2	0	2	FALSE	162.5	-0.530334	0.487007	-0.192886	0.873736	NA	NA	-0.450347	0.42539
NA	NA	NA	2	0	2	FALSE	69	-1.20028	0.85033	NA	NA	NA	NA	-1.20028	0.85033
NA	NA	NA	2	0	2	FALSE	74	NA	NA	-2.34384	1.16986	NA	NA	-2.34384	1.16986
NA	NA	NA	2	0	2	FALSE	59	NA	NA	-0.254099	1.21916	NA	NA	-0.254099	1.21916
NA	NA	NA	2	0	2	FALSE	56	NA	NA	-1.41288	1.28086	NA	NA	-1.41288	1.28086
NA	NA	NA	2	0	2	FALSE	57	-1.15031	0.932562	NA	NA	NA	NA	-1.15031	0.932562
NA	NA	NA	2	0	2	FALSE	61	NA	NA	-0.23173	1.19877	NA	NA	-0.23173	1.19877
NA	NA	NA	1	0	1	FALSE	3925	0.0194204	0.14856	-0.290744	0.144642	-0.274019	0.3492	-0.150669	0.0993519
NA	NA	NA	2	0	2	FALSE	55	-1.2438	0.952367	NA	NA	NA	NA	-1.2438	0.952367
NA	NA	NA	2	0	2	FALSE	64.5	-1.35575	0.849475	0.690491	1.21093	NA	NA	-0.680883	0.695425
NA	NA	NA	2	0	2	FALSE	57	NA	NA	NA	NA	-1.99901	1.05657	-1.99901	1.05657
NA	NA	NA	2	0	2	FALSE	59	-0.280362	0.929761	-0.364163	1.18143	NA	NA	-0.312413	0.730638
NA	NA	NA	2	0	2	FALSE	69	NA	NA	-1.51933	1.05659	-1.00155	1.05024	-1.25888	0.744868
NA	NA	NA	2	0	2	FALSE	64	-2.56542	0.97144	NA	NA	NA	NA	-2.56542	0.97144
NA	NA	NA	2	0	2	FALSE	317.333	-0.335946	0.362163	-0.688076	0.443912	0.473516	0.798617	-0.372238	0.264751
NA	NA	NA	2	0	2	FALSE	159.667	-0.851779	0.537967	-0.555255	0.59816	0.323743	1.02362	-0.581029	0.372559
NA	NA	NA	2	0	2	FALSE	96	-0.0867057	0.705489	NA	NA	NA	NA	-0.0867057	0.705489
NA	NA	NA	2	0	2	FALSE	147.5	-1.0024	0.586146	-0.652282	0.772759	NA	NA	-0.874532	0.467002
NA	NA	NA	2	0	2	FALSE	411.667	-0.0650835	0.317639	-0.208877	0.411838	-0.214832	0.626172	-0.13207	0.233395
NA	NA	NA	3	0	3	FALSE	52	NA	NA	0.11456	1.29402	NA	NA	0.11456	1.29402
NA	NA	NA	2	0	2	FALSE	292.667	0.0273936	0.372842	0.17852	0.512717	-0.129866	0.635217	0.041133	0.272408
NA	NA	NA	2	0	2	FALSE	90.6667	-0.427632	0.600801	-0.593087	1.02078	-0.359472	1.07095	-0.449223	0.466153
NA	NA	NA	2	0	2	FALSE	187.333	0.532516	0.539674	-0.598746	0.585886	-0.918815	0.706462	-0.210394	0.346056
NA	NA	NA	2	0	2	FALSE	54	NA	NA	-0.407634	1.27653	NA	NA	-0.407634	1.27653
NA	NA	NA	2	0	2	FALSE	169	-1.08628	0.494823	-1.05799	0.617473	0.585492	0.999345	-0.859491	0.360182
NA	NA	NA	2	0	2	FALSE	231.667	-0.387434	0.435314	0.00895154	0.5377	-0.258591	0.729595	-0.235467	0.306938
NA	NA	NA	2	0	2	FALSE	164.667	0.66291	0.559144	-0.492557	0.636842	0.139767	0.735603	0.154967	0.36485
NA	NA	NA	2	0	2	FALSE	63	-1.4888	0.900011	NA	NA	NA	NA	-1.4888	0.900011
NA	NA	NA	2	0	2	FALSE	502.333	-0.285056	0.277306	0.37698	0.406202	-0.305991	0.561989	-0.107554	0.21209
NA	NA	NA	2	0	2	FALSE	251	-0.0745871	0.394759	-0.012756	0.534353	-0.372109	0.742452	-0.102132	0.291936
NA	NA	NA	2	0	2	FALSE	66.5	0.951088	0.853578	0.0339227	1.1245	NA	NA	0.615809	0.67989
NA	NA	NA	2	0	2	FALSE	179	-0.388917	0.454294	-0.401455	0.605396	0.227118	1.05851	-0.328016	0.343678
NA	NA	NA	2	0	2	FALSE	54	NA	NA	-0.753492	1.28323	NA	NA	-0.753492	1.28323
NA	NA	NA	1	0	1	FALSE	34400.3	-0.0693433	0.114249	-0.112925	0.0758348	-0.00608486	0.314403	-0.0959662	0.0619443
NA	NA	NA	2	0	2	FALSE	69.5	0.261998	0.82627	-0.764609	1.12768	NA	NA	-0.0966248	0.666505
NA	NA	NA	2	0	2	FALSE	93.5	0.442891	0.772047	0.442191	0.897078	NA	NA	0.442593	0.585174
NA	NA	NA	2	0	2	FALSE	288	0.785348	0.42972	-0.568029	0.48564	-0.143518	0.587897	0.113894	0.282293
NA	NA	NA	2	0	2	FALSE	52	NA	NA	-1.43901	1.33027	NA	NA	-1.43901	1.33027
NA	NA	NA	2	0	2	FALSE	110	0.367648	0.630033	-0.146777	0.936237	NA	NA	0.207303	0.522701
NA	NA	NA	2	0	2	FALSE	64	NA	NA	0.00257655	1.16778	NA	NA	0.00257655	1.16778
NA	NA	NA	2	0	2	FALSE	226.667	0.55516	0.400104	-0.509039	0.566079	-0.171095	0.833563	0.151127	0.304197
NA	NA	NA	2	0	2	FALSE	120	-0.815606	0.668949	0.324025	0.818616	NA	NA	-0.359302	0.517995
NA	NA	NA	2	0	2	FALSE	63	NA	NA	1.0674	1.17036	NA	NA	1.0674	1.17036
NA	NA	NA	2	0	2	FALSE	147.667	-0.505062	0.456084	1.26182	0.806308	-0.0980373	0.940865	-0.0799873	0.365753
NA	NA	NA	2	0	2	FALSE	213.333	-0.0441461	0.443627	0.0800633	0.531407	0.129412	0.900478	0.0222008	0.318536
NA	NA	NA	2	0	2	FALSE	215.667	0.0122262	0.406797	0.377261	0.589336	-0.155712	0.82958	0.0900072	0.310458
NA	NA	NA	2	0	2	FALSE	70	-0.867346	0.773183	0.354454	1.22342	NA	NA	-0.518631	0.653598
NA	NA	NA	2	0	2	FALSE	243.667	-0.382455	0.394728	0.224937	0.541217	-0.109328	0.787106	-0.162777	0.295577
NA	NA	NA	2	0	2	FALSE	288.667	0.155653	0.383613	-0.438319	0.464774	0.374346	0.770286	-0.0259709	0.276184
NA	NA	NA	2	0	2	FALSE	122.333	0.843157	0.747353	-0.0239334	0.70807	-0.378253	0.775831	0.153026	0.428497
NA	NA	NA	2	0	2	FALSE	94.5	0.624904	0.748265	0.462642	0.909642	NA	NA	0.559419	0.577874
NA	NA	NA	2	0	2	FALSE	80	-1.20338	0.987048	-0.543439	0.90122	NA	NA	-0.843476	0.665537
NA	NA	NA	2	0	2	FALSE	333.667	-0.307983	0.372994	-0.00796187	0.456747	-0.921022	0.602196	-0.325104	0.260477
NA	NA	NA	2	0	2	FALSE	300.333	-0.036826	0.380816	-0.722534	0.484327	-0.201655	0.649788	-0.281788	0.271893
NA	NA	NA	2	0	2	FALSE	320	-0.825948	0.322146	-0.319791	0.517352	-0.388191	0.782013	-0.652239	0.258136
NA	NA	NA	2	0	2	FALSE	189	0.284843	0.427393	0.818176	0.678147	-1.00797	0.783259	0.182722	0.328284
NA	NA	NA	2	0	2	FALSE	84	0.442207	0.776885	-0.403982	0.989519	NA	NA	0.119519	0.611057
NA	NA	NA	2	0	2	FALSE	360.333	-0.523389	0.336775	0.0164895	0.445483	-0.666425	0.650165	-0.376546	0.248287
NA	NA	NA	2	0	2	FALSE	260	0.136825	0.446971	-1.17716	0.52933	-0.958294	0.603494	-0.543069	0.297217
NA	NA	NA	2	0	2	FALSE	118.5	-1.26098	0.559033	1.23098	1.08699	NA	NA	-0.739729	0.49714
NA	NA	NA	2	0	2	FALSE	169	-0.719594	0.510199	-0.43462	0.611943	0.176218	0.890077	-0.476263	0.358648
NA	NA	NA	2	0	2	FALSE	131.333	-0.0746828	0.564495	-0.161632	0.757882	-1.95814	0.864465	-0.504406	0.401049
NA	NA	NA	2	0	2	FALSE	220.667	0.465826	0.429033	0.538389	0.571171	-0.268819	0.727256	0.353533	0.310255
NA	NA	NA	2	0	2	FALSE	184.667	-0.379753	0.464304	0.245552	0.633685	-0.507223	0.785788	-0.225354	0.33809
NA	NA	NA	2	0	2	FALSE	370.333	0.0395666	0.314403	-0.184464	0.495717	-0.689503	0.592718	-0.135803	0.242306
NA	NA	NA	2	0	2	FALSE	227	-0.153105	0.427132	0.606897	0.590949	-0.715377	0.667827	-0.0666248	0.307337
NA	NA	NA	2	0	2	FALSE	103	0.238026	0.778194	-1.17175	0.842436	NA	NA	-0.411066	0.57163
NA	NA	NA	2	0	2	FALSE	135.333	-0.244388	0.514898	-0.717486	0.722457	-0.21646	1.08943	-0.379585	0.391319
NA	NA	NA	2	0	2	FALSE	70	NA	NA	-1.12345	1.13638	NA	NA	-1.12345	1.13638
NA	NA	NA	1	0	1	FALSE	28011.3	-0.116894	0.115459	-0.130307	0.0792424	-0.223931	0.314859	-0.130054	0.0639721
NA	NA	NA	2	0	2	FALSE	88	0.466379	0.705343	-0.711391	1.04759	NA	NA	0.0989993	0.585083
NA	NA	NA	2	0	2	FALSE	110.5	NA	NA	-2.50611	0.792771	-0.493035	1.04484	-1.77061	0.631554
NA	NA	NA	2	0	2	FALSE	264	-0.377707	0.386105	0.236364	0.534193	-0.0473498	0.694098	-0.14678	0.285273
NA	NA	NA	2	0	2	FALSE	92	-0.519502	0.729031	0.227031	0.967689	NA	NA	-0.249204	0.582281
NA	NA	NA	2	0	2	FALSE	163.333	0.0834856	0.534011	-1.22762	0.612562	0.0268346	0.90086	-0.397869	0.36751
NA	NA	NA	2	0	2	FALSE	77.3333	-0.964376	0.674624	-0.5509	1.21355	-1.09333	0.988679	-0.926208	0.506416
NA	NA	NA	2	0	2	FALSE	128.667	-0.603762	0.52628	0.106477	0.793021	-0.443915	0.948998	-0.396685	0.398063
NA	NA	NA	2	0	2	FALSE	156	-0.0262762	0.487838	-0.198473	0.675625	0.150488	0.939831	-0.0498138	0.364546
NA	NA	NA	2	0	2	FALSE	183	0.132635	0.517975	-0.665953	0.621849	-0.773568	0.705453	-0.334295	0.346633
NA	NA	NA	2	0	2	FALSE	102.5	0.264673	0.666695	-0.0672542	0.944988	NA	NA	0.154364	0.544765
NA	NA	NA	2	0	2	FALSE	91.5	-1.40672	0.641193	0.141862	1.22517	NA	NA	-1.07377	0.568096
NA	NA	NA	2	0	2	FALSE	252.333	-0.723202	0.412152	-0.452035	0.568683	-0.646979	0.633075	-0.633551	0.295216
NA	NA	NA	2	0	2	FALSE	336	-0.479709	0.333035	-0.109473	0.492675	-0.527026	0.652524	-0.38838	0.254127
NA	NA	NA	2	0	2	FALSE	161.333	-0.732474	0.492388	0.106154	0.688082	-0.659848	0.832408	-0.488188	0.360845
NA	NA	NA	2	0	2	FALSE	107.667	0.436983	0.538472	0.374664	0.946717	-0.576172	1.005	0.243877	0.424298
NA	NA	NA	2	0	2	FALSE	370.667	-0.167366	0.366452	-0.338377	0.435283	-0.331397	0.554409	-0.257254	0.250172
NA	NA	NA	2	0	2	FALSE	215.667	0.0226368	0.407377	-0.232972	0.605454	0.0644265	0.786504	-0.0380882	0.310531
NA	NA	NA	2	0	2	FALSE	74.5	-0.206665	0.772505	0.348419	1.12198	NA	NA	-0.0281492	0.636273
NA	NA	NA	2	0	2	FALSE	82.5	-0.687143	0.981938	-0.112891	0.873042	NA	NA	-0.366422	0.652451
NA	NA	NA	2	0	2	FALSE	59	0.253688	0.915731	-1.72787	1.23229	NA	NA	-0.451269	0.735008
NA	NA	NA	2	0	2	FALSE	68	0.532591	0.947728	-0.928115	1.03301	NA	NA	-0.134986	0.698352
NA	NA	NA	2	0	2	FALSE	68.5	-0.311625	0.921982	-0.678934	1.04702	NA	NA	-0.472049	0.691945
NA	NA	NA	1	0	1	FALSE	4984.33	-0.038723	0.139499	-0.0844233	0.132244	-0.007983	0.344011	-0.0588346	0.0924427
NA	NA	NA	2	0	2	FALSE	69	NA	NA	-1.96141	1.18178	NA	NA	-1.96141	1.18178
NA	NA	NA	2	0	2	FALSE	54	-0.641502	0.94439	NA	NA	NA	NA	-0.641502	0.94439
NA	NA	NA	2	0	2	FALSE	71	NA	NA	-0.210134	1.11113	NA	NA	-0.210134	1.11113
NA	NA	NA	2	0	2	FALSE	109.5	0.108434	0.676994	-0.470816	0.876616	NA	NA	-0.107973	0.535811
NA	NA	NA	2	0	2	FALSE	66	NA	NA	-1.53138	1.185	NA	NA	-1.53138	1.185
NA	NA	NA	2	0	2	FALSE	141.5	-0.0802175	0.620448	-1.03803	0.756219	NA	NA	-0.465573	0.479664
NA	NA	NA	2	0	2	FALSE	500	-0.425157	0.294701	-0.478294	0.356825	0.471893	0.660745	-0.349559	0.214874
NA	NA	NA	2	0	2	FALSE	317	-0.131096	0.350117	-0.173547	0.482062	-0.164418	0.683008	-0.148495	0.26167
NA	NA	NA	2	0	2	FALSE	234.5	-0.513611	0.43625	0.0455287	0.65584	NA	NA	-0.3421	0.363231
NA	NA	NA	2	0	2	FALSE	166.333	0.219787	0.585493	-1.84308	0.591827	-0.163236	0.858527	-0.67926	0.374532
NA	NA	NA	2	0	2	FALSE	242.667	-0.468693	0.396407	-1.02422	0.526558	-0.622789	0.909818	-0.664583	0.299094
NA	NA	NA	2	0	2	FALSE	419.333	-0.181625	0.305378	-0.140324	0.402699	0.238109	0.712052	-0.124233	0.230253
NA	NA	NA	2	0	2	FALSE	219.333	-0.54422	0.396374	0.0829719	0.594026	0.148183	0.866271	-0.287834	0.308147
NA	NA	NA	2	0	2	FALSE	83	-1.1514	0.775263	NA	NA	NA	NA	-1.1514	0.775263
NA	NA	NA	2	0	2	FALSE	408.333	-0.616296	0.310489	-0.501091	0.412508	0.517532	0.707176	-0.454962	0.234086
NA	NA	NA	2	0	2	FALSE	282.667	-0.0708983	0.372315	-0.0506695	0.491087	-0.296482	0.76088	-0.0942613	0.276418
NA	NA	NA	2	0	2	FALSE	68.5	-0.368922	0.838715	-0.216284	1.12714	NA	NA	-0.314526	0.67287
NA	NA	NA	2	0	2	FALSE	151.5	-0.134409	0.505108	0.560689	0.884382	NA	NA	0.0365624	0.438611
NA	NA	NA	2	0	2	FALSE	238.667	-0.5442	0.427541	-1.67719	0.501154	0.848495	0.99134	-0.839712	0.309051
NA	NA	NA	1	0	1	FALSE	40263	-0.196697	0.113246	-0.214027	0.0738753	0.159663	0.314926	-0.195158	0.0607132
NA	NA	NA	2	0	2	FALSE	90	0.647191	0.770985	-0.564714	0.936363	NA	NA	0.157536	0.59519
NA	NA	NA	2	0	2	FALSE	59	-0.17044	0.896722	NA	NA	NA	NA	-0.17044	0.896722
NA	NA	NA	2	0	2	FALSE	319.333	-0.102987	0.367041	-0.743322	0.43556	0.51279	0.795168	-0.271205	0.26467
NA	NA	NA	2	0	2	FALSE	149	-0.239601	0.531641	0.506964	0.833868	NA	NA	-0.0238382	0.448282
NA	NA	NA	2	0	2	FALSE	86	NA	NA	-2.94976	1.15181	NA	NA	-2.94976	1.15181
NA	NA	NA	2	0	2	FALSE	275.667	0.154144	0.418633	-0.779745	0.452435	-0.0601279	0.796747	-0.248586	0.286693
NA	NA	NA	2	0	2	FALSE	112.667	-0.741162	0.578332	-1.03108	0.930886	-1.15056	0.861864	-0.902494	0.426787
NA	NA	NA	2	0	2	FALSE	207	-1.30087	0.455415	-0.566705	0.742613	NA	NA	-1.10022	0.388226
NA	NA	NA	2	0	2	FALSE	87	-1.21952	0.759436	NA	NA	NA	NA	-1.21952	0.759436
NA	NA	NA	2	0	2	FALSE	233	-0.143822	0.364182	-0.00822782	0.611737	0.169785	0.895166	-0.078054	0.295398
NA	NA	NA	2	0	2	FALSE	318.667	0.0677972	0.358733	-1.00387	0.47043	0.165028	0.683949	-0.253449	0.263276
NA	NA	NA	2	0	2	FALSE	107.5	-0.784646	0.596727	-0.953347	1.08642	NA	NA	-0.823745	0.523025
NA	NA	NA	2	0	2	FALSE	87	-1.81157	0.781684	NA	NA	NA	NA	-1.81157	0.781684
NA	NA	NA	2	0	2	FALSE	306.333	0.216385	0.387056	-0.373975	0.427985	-0.0708269	0.821603	-0.0515742	0.271006
NA	NA	NA	2	0	2	FALSE	295	0.179923	0.357137	-0.335223	0.470942	0.574184	0.869727	0.0481493	0.270457
NA	NA	NA	2	0	2	FALSE	107	-0.894564	0.67941	NA	NA	NA	NA	-0.894564	0.67941
NA	NA	NA	2	0	2	FALSE	271	-0.380618	0.375737	-0.737858	0.518905	0.126772	0.753848	-0.415173	0.282203
NA	NA	NA	2	0	2	FALSE	263.667	-0.025343	0.418037	-0.027647	0.475925	-0.6397	0.759889	-0.115841	0.290263
NA	NA	NA	2	0	2	FALSE	86	NA	NA	-0.160339	1.0094	NA	NA	-0.160339	1.0094
NA	NA	NA	2	0	2	FALSE	147.667	-0.275486	0.528997	-1.24937	0.669783	0.0168296	0.972566	-0.546902	0.381807
NA	NA	NA	2	0	2	FALSE	208.5	0.599129	0.510715	-0.28473	0.617317	NA	NA	0.239987	0.393505
NA	NA	NA	2	0	2	FALSE	304.5	0.0147374	0.418535	0.010404	0.521903	NA	NA	0.0130413	0.326512
NA	NA	NA	2	0	2	FALSE	158.667	0.267688	0.50934	0.114419	0.606048	0.660274	1.08577	0.256338	0.366975
NA	NA	NA	2	0	2	FALSE	257	-0.378653	0.407636	-0.426094	0.480975	0.440732	0.879483	-0.305223	0.293186
NA	NA	NA	2	0	2	FALSE	207.667	-0.00514086	0.440975	-0.232984	0.549719	0.742301	0.904148	0.0114328	0.321497
NA	NA	NA	2	0	2	FALSE	61	0.210746	0.871302	-0.124168	1.20736	NA	NA	0.096056	0.706536
NA	NA	NA	2	0	2	FALSE	225	-0.609124	0.515452	-1.24099	0.590472	NA	NA	-0.882391	0.388312
NA	NA	NA	1	0	1	FALSE	23565	-0.131763	0.115853	-0.177812	0.0810997	0.360234	0.320357	-0.141105	0.0650544
NA	NA	NA	2	0	2	FALSE	144	NA	NA	-1.7148	0.809461	NA	NA	-1.7148	0.809461
NA	NA	NA	2	0	2	FALSE	56	NA	NA	-1.51357	1.28535	NA	NA	-1.51357	1.28535
NA	NA	NA	2	0	2	FALSE	319.5	-0.226206	0.393831	-0.319127	0.533444	NA	NA	-0.258986	0.316838
NA	NA	NA	2	0	2	FALSE	100	-1.00465	0.675423	0.325074	0.977596	NA	NA	-0.575003	0.555693
NA	NA	NA	2	0	2	FALSE	199	-0.162637	0.493226	0.323763	0.667648	NA	NA	0.00909475	0.396713
NA	NA	NA	2	0	2	FALSE	87	NA	NA	-1.00367	1.01678	NA	NA	-1.00367	1.01678
NA	NA	NA	2	0	2	FALSE	100	-0.30651	0.680559	-1.08238	0.969913	NA	NA	-0.562479	0.557098
NA	NA	NA	2	0	2	FALSE	51	NA	NA	-2.17123	1.3915	NA	NA	-2.17123	1.3915
NA	NA	NA	2	0	2	FALSE	208	-0.173604	0.454648	-0.037405	0.706154	NA	NA	-0.133691	0.382269
NA	NA	NA	2	0	2	FALSE	206	-0.312276	0.393753	-0.666295	0.628627	-0.351658	0.974527	-0.405697	0.315701
NA	NA	NA	2	0	2	FALSE	112.5	0.326135	0.803277	-0.57568	0.764237	NA	NA	-0.147219	0.553684
NA	NA	NA	2	0	2	FALSE	243.5	-0.311528	0.428063	-0.00720672	0.642242	NA	NA	-0.217921	0.356195
NA	NA	NA	3	0	3	FALSE	51	-2.13769	1.04134	NA	NA	NA	NA	-2.13769	1.04134
NA	NA	NA	2	0	2	FALSE	157	0.434973	0.498613	-1.28615	0.644415	0.561694	1.03968	-0.112557	0.368718
NA	NA	NA	2	0	2	FALSE	82.5	-1.38969	0.80163	-0.358244	1.01161	NA	NA	-0.991831	0.628281
NA	NA	NA	2	0	2	FALSE	75	-0.367373	0.799293	NA	NA	NA	NA	-0.367373	0.799293
NA	NA	NA	2	0	2	FALSE	82	0.154305	0.759963	NA	NA	NA	NA	0.154305	0.759963
NA	NA	NA	2	0	2	FALSE	61	NA	NA	-0.259296	1.19913	NA	NA	-0.259296	1.19913
NA	NA	NA	2	0	2	FALSE	70	-1.90782	0.875304	NA	NA	NA	NA	-1.90782	0.875304
NA	NA	NA	1	0	1	FALSE	5350.33	-0.110366	0.13579	-0.18423	0.127029	0.222496	0.354888	-0.125949	0.0897503
NA	NA	NA	2	0	2	FALSE	68	-0.380618	0.838877	NA	NA	NA	NA	-0.380618	0.838877
NA	NA	NA	2	0	2	FALSE	73	-0.45157	0.811136	NA	NA	NA	NA	-0.45157	0.811136
NA	NA	NA	2	0	2	FALSE	74.5	0.00631871	0.828412	-1.59631	1.0793	NA	NA	-0.587813	0.657154
NA	NA	NA	2	0	2	FALSE	55.5	-1.57832	0.98445	-0.22263	1.22918	NA	NA	-1.04855	0.768388
NA	NA	NA	2	0	2	FALSE	69.5	-0.265549	0.763867	1.08907	1.23017	NA	NA	0.111408	0.648939
NA	NA	NA	2	0	2	FALSE	169.5	-0.114442	0.585594	-0.505353	0.669582	NA	NA	-0.283858	0.440799
NA	NA	NA	2	0	2	FALSE	162	-0.0731336	0.608724	-0.65189	0.677875	NA	NA	-0.331495	0.452914
NA	NA	NA	2	0	2	FALSE	74	NA	NA	-2.54572	1.18953	NA	NA	-2.54572	1.18953
NA	NA	NA	2	0	2	FALSE	86	-1.05179	0.679442	0.424099	1.16434	NA	NA	-0.676878	0.586834
NA	NA	NA	2	0	2	FALSE	102	-1.27201	0.653099	-0.054318	1.01428	NA	NA	-0.915113	0.54911
NA	NA	NA	2	0	2	FALSE	131	-0.55931	0.565182	0.550154	0.896569	NA	NA	-0.243804	0.478113
NA	NA	NA	2	0	2	FALSE	180.5	-0.368922	0.492388	0.982931	0.743103	NA	NA	0.0435258	0.410458
NA	NA	NA	2	0	2	FALSE	130.667	-0.156912	0.583921	-0.842167	0.694504	-0.615353	0.976471	-0.470956	0.406394
NA	NA	NA	2	0	2	FALSE	55	0.107404	0.925212	NA	NA	NA	NA	0.107404	0.925212
NA	NA	NA	2	0	2	FALSE	90.5	-0.40105	0.735431	-0.459448	0.979453	NA	NA	-0.422104	0.588102
NA	NA	NA	1	0	1	FALSE	12561	-0.0637156	0.121594	-0.272331	0.0937721	0.477888	0.331627	-0.162427	0.0724613
NA	NA	NA	2	0	2	FALSE	51	NA	NA	-0.245959	1.31095	NA	NA	-0.245959	1.31095
NA	NA	NA	2	0	2	FALSE	130	-0.235276	0.689604	-0.231132	0.744076	NA	NA	-0.233361	0.505786
NA	NA	NA	2	0	2	FALSE	83.5	-1.41469	0.752835	-0.0225326	1.06518	NA	NA	-0.950934	0.614785
NA	NA	NA	2	0	2	FALSE	101.5	-0.205265	0.706594	0.187986	0.902685	NA	NA	-0.0558564	0.556403
NA	NA	NA	2	0	2	FALSE	84.5	0.0595324	0.747446	-0.0506246	1.02024	NA	NA	0.0210581	0.60295
NA	NA	NA	2	0	2	FALSE	113	-0.942536	0.752644	-0.501209	0.798097	NA	NA	-0.734797	0.547563
NA	NA	NA	2	0	2	FALSE	118	-0.00847048	0.637487	-0.192491	0.7072	-0.0479994	1.00159	-0.0831175	0.428078
NA	NA	NA	2	0	2	FALSE	256.667	-0.60652	0.377689	-0.197854	0.524513	0.216031	0.857118	-0.389542	0.2886
NA	NA	NA	2	0	2	FALSE	67	NA	NA	-2.69859	1.26835	NA	NA	-2.69859	1.26835
NA	NA	NA	2	0	2	FALSE	254.333	-1.04907	0.372024	-0.965434	0.555054	-0.220509	0.858792	-0.93113	0.290778
NA	NA	NA	2	0	2	FALSE	447	-0.0727402	0.299838	0.24443	0.401458	-0.148244	0.616039	0.0158738	0.223815
NA	NA	NA	2	0	2	FALSE	284.333	-0.709122	0.362077	0.0883803	0.49052	0.218771	0.852764	-0.360276	0.275669
NA	NA	NA	2	0	2	FALSE	70.5	-0.0815725	0.823442	-2.50409	1.20989	NA	NA	-0.848469	0.680738
NA	NA	NA	2	0	2	FALSE	639.667	0.182755	0.264776	-0.212943	0.325404	0.0893517	0.54772	0.0330471	0.192303
NA	NA	NA	2	0	2	FALSE	412.333	0.0565236	0.334827	-0.135812	0.389789	-0.0517055	0.625721	-0.028897	0.235338
NA	NA	NA	2	0	2	FALSE	67.5	-0.145187	0.927974	-1.68019	1.083	NA	NA	-0.795059	0.704669
NA	NA	NA	2	0	2	FALSE	208.5	-0.160118	0.499126	-0.573588	0.636143	NA	NA	-0.317667	0.392682
NA	NA	NA	2	0	2	FALSE	361.667	-0.896675	0.309243	-0.623211	0.450259	0.349012	0.958022	-0.732458	0.24634
NA	NA	NA	2	0	2	FALSE	113	-0.167439	0.64139	-1.83008	0.934675	NA	NA	-0.699718	0.528849
NA	NA	NA	1	0	1	FALSE	53806.3	-0.129222	0.11235	-0.149355	0.0710469	0.0670087	0.312959	-0.136126	0.0589722
NA	NA	NA	2	0	2	FALSE	164	-1.54203	0.570857	-0.345102	0.727095	NA	NA	-1.08559	0.449005
NA	NA	NA	2	0	2	FALSE	137.5	-0.0523428	0.587161	0.056035	0.804934	NA	NA	-0.014703	0.474366
NA	NA	NA	2	0	2	FALSE	439	-0.0200485	0.305053	-0.411487	0.405343	-0.451435	0.612278	-0.201236	0.226456
NA	NA	NA	2	0	2	FALSE	66	NA	NA	-0.297485	1.15343	NA	NA	-0.297485	1.15343
NA	NA	NA	2	0	2	FALSE	146	-0.603762	0.586251	0.130144	0.765975	NA	NA	-0.332659	0.465545
NA	NA	NA	2	0	2	FALSE	89.5	-0.872026	0.695023	0.036915	1.06464	NA	NA	-0.600411	0.581985
NA	NA	NA	2	0	2	FALSE	330.667	-0.176509	0.338985	-0.391117	0.459084	0.516185	0.755695	-0.163699	0.256509
NA	NA	NA	2	0	2	FALSE	184.333	-1.28231	0.439862	-0.576679	0.631919	-0.0975549	1.01734	-0.945259	0.340227
NA	NA	NA	2	0	2	FALSE	220.667	0.0530177	0.412356	-0.593139	0.577124	0.10859	0.799555	-0.124349	0.309379
NA	NA	NA	2	0	2	FALSE	51	-1.35753	0.993046	NA	NA	NA	NA	-1.35753	0.993046
NA	NA	NA	2	0	2	FALSE	240.667	-0.130521	0.382743	-0.636533	0.544424	0.359106	0.915918	-0.229147	0.296276
NA	NA	NA	2	0	2	FALSE	291.333	-0.0530903	0.371779	-0.167816	0.465562	0.514911	0.816201	-0.0288713	0.273694
NA	NA	NA	2	0	2	FALSE	98.5	0.345927	0.669288	-0.235322	0.982149	NA	NA	0.161603	0.553078
NA	NA	NA	2	0	2	FALSE	124.333	1.01443	0.718108	-0.510216	0.688879	-0.43197	0.819563	0.0449675	0.425042
NA	NA	NA	2	0	2	FALSE	56	-0.844924	0.932091	NA	NA	NA	NA	-0.844924	0.932091
NA	NA	NA	2	0	2	FALSE	157.667	0.165223	0.541267	-0.36631	0.601456	0.82603	0.977073	0.0576601	0.372029
NA	NA	NA	2	0	2	FALSE	285.667	0.460245	0.410927	-0.745581	0.464183	0.443344	0.687151	0.0161028	0.280817
NA	NA	NA	2	0	2	FALSE	277	-0.521391	0.362415	-0.219834	0.515255	0.206173	0.795896	-0.345107	0.27779
NA	NA	NA	2	0	2	FALSE	104	-0.26589	0.686607	-0.858033	0.918706	NA	NA	-0.478102	0.549981
NA	NA	NA	2	0	2	FALSE	386.333	-0.340935	0.325717	0.213895	0.456501	-0.855422	0.57396	-0.277165	0.240702
NA	NA	NA	2	0	2	FALSE	281.667	0.237408	0.405295	-0.255361	0.52726	-0.501682	0.585129	-0.0744565	0.281656
NA	NA	NA	2	0	2	FALSE	154	-0.350489	0.537006	0.527336	0.793762	NA	NA	-0.0748639	0.444781
NA	NA	NA	2	0	2	FALSE	216.333	-0.185052	0.46878	-0.450784	0.519734	-0.0651395	0.821581	-0.267864	0.320519
NA	NA	NA	2	0	2	FALSE	81	-0.291387	0.730139	0.235707	1.09922	NA	NA	-0.130025	0.608195
NA	NA	NA	1	0	1	FALSE	33514.3	-0.154447	0.114282	-0.10413	0.0766313	-0.096941	0.314363	-0.118839	0.0623812
NA	NA	NA	2	0	2	FALSE	132	-0.354025	0.587596	-0.317643	0.846146	NA	NA	-0.342188	0.482635
NA	NA	NA	2	0	2	FALSE	117	-1.10185	0.62191	0.435975	0.914119	NA	NA	-0.615269	0.514193
NA	NA	NA	2	0	2	FALSE	325.333	0.0467156	0.360043	0.0542855	0.452353	-0.127637	0.681053	0.0237505	0.260315
NA	NA	NA	2	0	2	FALSE	93.5	0.336245	0.688609	0.277026	1.00004	NA	NA	0.317198	0.567155
NA	NA	NA	2	0	2	FALSE	247.333	-0.427259	0.40131	-0.0884355	0.513076	0.140158	0.836381	-0.243807	0.295689
NA	NA	NA	2	0	2	FALSE	85	NA	NA	-1.9937	0.921867	0.0812201	1.03284	-1.07366	0.687758
NA	NA	NA	2	0	2	FALSE	141.667	0.041236	0.63977	-0.370408	0.600275	-0.299102	0.988229	-0.1976	0.400245
NA	NA	NA	2	0	2	FALSE	51	NA	NA	-0.136666	1.30947	NA	NA	-0.136666	1.30947
NA	NA	NA	2	0	2	FALSE	279.5	-0.627087	0.38574	0.340039	0.642119	NA	NA	-0.370624	0.330663
NA	NA	NA	2	0	2	FALSE	235.333	-0.301481	0.417488	-0.372425	0.551524	0.0732821	0.728479	-0.258127	0.302762
NA	NA	NA	2	0	2	FALSE	72	-0.192663	0.896997	-0.0380907	1.01413	NA	NA	-0.124815	0.671886
NA	NA	NA	2	0	2	FALSE	71	-0.331828	0.863576	-1.74625	1.09991	NA	NA	-0.871221	0.679238
NA	NA	NA	2	0	2	FALSE	104.5	0.546144	0.786263	-0.702994	0.818326	NA	NA	-0.0534745	0.566968
NA	NA	NA	2	0	2	FALSE	87.5	-1.11459	0.765313	-0.596197	0.992172	NA	NA	-0.92121	0.605984
NA	NA	NA	2	0	2	FALSE	148	-0.115262	0.561238	-0.587102	0.790655	NA	NA	-0.273351	0.457658
NA	NA	NA	2	0	2	FALSE	134	0.239325	0.682566	-1.009	0.737405	NA	NA	-0.336698	0.500913
NA	NA	NA	2	0	2	FALSE	59	NA	NA	-1.25051	1.24173	NA	NA	-1.25051	1.24173
NA	NA	NA	2	0	2	FALSE	135.5	-1.12306	0.566386	0.673234	0.876099	NA	NA	-0.593597	0.475645
NA	NA	NA	1	0	1	FALSE	12067	-0.133861	0.122063	-0.0961942	0.0963446	0.137363	0.328063	-0.0981382	0.0736929
NA	NA	NA	2	0	2	FALSE	57	NA	NA	-3.38841	1.50678	NA	NA	-3.38841	1.50678
NA	NA	NA	2	0	2	FALSE	59	NA	NA	-1.62047	1.25745	NA	NA	-1.62047	1.25745
NA	NA	NA	2	0	2	FALSE	91	0.374637	0.678553	0.47257	1.04805	NA	NA	0.403564	0.569592
NA	NA	NA	2	0	2	FALSE	71.5	-0.880515	0.735016	0.125802	1.29391	NA	NA	-0.63501	0.639099
NA	NA	NA	2	0	2	FALSE	113	-1.46599	0.619333	0.489103	0.976675	NA	NA	-0.905284	0.523037
NA	NA	NA	2	0	2	FALSE	84	-0.634067	0.849065	-3.45002	1.14467	NA	NA	-1.63352	0.681941
NA	NA	NA	2	0	2	FALSE	173	0.220962	0.50318	-0.719888	0.761045	NA	NA	-0.0652223	0.419733
NA	NA	NA	2	0	2	FALSE	146.5	-0.904248	0.615969	-0.762128	0.742691	NA	NA	-0.846329	0.474122
NA	NA	NA	2	0	2	FALSE	201.667	-0.213618	0.41969	-0.124168	0.606034	0.0543037	0.880663	-0.15283	0.321255
NA	NA	NA	2	0	2	FALSE	203	-0.264318	0.455212	0.401137	0.586955	-0.566332	0.756688	-0.116127	0.324872
NA	NA	NA	2	0	2	FALSE	79	0.84048	0.730552	-0.254715	1.11955	NA	NA	0.513406	0.611815
NA	NA	NA	2	0	2	FALSE	134	0.252326	0.521548	0.293373	0.983188	NA	NA	0.26134	0.460737
NA	NA	NA	1	0	1	FALSE	18869.3	-0.0271098	0.11791	-0.0569775	0.0861943	0.0372707	0.318913	-0.0427651	0.0679848
NA	NA	NA	2	0	2	FALSE	69	0.320714	0.803313	-1.51602	1.19338	NA	NA	-0.252025	0.666399
NA	NA	NA	2	0	2	FALSE	218.667	0.215972	0.415012	-0.199286	0.581839	-0.250523	0.781371	0.0245188	0.310119
NA	NA	NA	2	0	2	FALSE	73.5	-0.341398	0.774069	0.590281	1.13706	NA	NA	-0.0463556	0.639871
NA	NA	NA	2	0	2	FALSE	82	0.104128	0.686747	1.0116	1.17056	NA	NA	0.336496	0.592332
NA	NA	NA	2	0	2	FALSE	89	0.611487	0.697527	0.499283	0.872998	-0.0221744	1.03332	0.439395	0.48202
NA	NA	NA	2	0	2	FALSE	61	NA	NA	-2.75929	1.33753	NA	NA	-2.75929	1.33753
NA	NA	NA	2	0	2	FALSE	56	-1.16338	0.941168	NA	NA	NA	NA	-1.16338	0.941168
NA	NA	NA	2	0	2	FALSE	67	NA	NA	-2.15632	1.21323	NA	NA	-2.15632	1.21323
NA	NA	NA	1	0	1	FALSE	3470	0.155243	0.151297	-0.282472	0.148048	0.449745	0.368686	-0.0289339	0.101709
NA	NA	NA	2	0	2	FALSE	50	0.571811	0.965994	NA	NA	NA	NA	0.571811	0.965994
NA	NA	NA	2	0	2	FALSE	79	NA	NA	-2.24155	1.12395	NA	NA	-2.24155	1.12395
NA	NA	NA	2	0	2	FALSE	180	-0.186868	0.462055	-0.0841634	0.591358	0.0974148	1.03277	-0.120813	0.34338
NA	NA	NA	2	0	2	FALSE	176	NA	NA	0.470287	0.70366	NA	NA	0.470287	0.70366
NA	NA	NA	2	0	2	FALSE	210.667	0.172139	0.440183	0.0270936	0.544717	0.285566	0.879901	0.137289	0.319067
NA	NA	NA	2	0	2	FALSE	159.667	-0.689983	0.467959	0.297913	0.765085	-0.460605	0.801954	-0.428884	0.357376
NA	NA	NA	2	0	2	FALSE	97	-0.989424	0.631643	0.348419	1.12198	NA	NA	-0.667456	0.550413
NA	NA	NA	2	0	2	FALSE	181	-0.758738	0.498448	0.280648	0.738576	NA	NA	-0.433481	0.413162
NA	NA	NA	2	0	2	FALSE	52	NA	NA	-0.617292	1.30465	NA	NA	-0.617292	1.30465
NA	NA	NA	1	0	1	FALSE	22414.3	-0.112294	0.116154	-0.160675	0.0822682	0.185656	0.32034	-0.130621	0.0657075
NA	NA	NA	2	0	2	FALSE	85	-1.09908	0.8793	-1.83997	0.948209	NA	NA	-1.44163	0.644745
NA	NA	NA	2	0	2	FALSE	82	-1.07667	0.846733	-1.17784	0.977351	NA	NA	-1.12005	0.639966
NA	NA	NA	2	0	2	FALSE	212.5	0.00969715	0.458174	0.0131114	0.679549	NA	NA	0.0107642	0.379892
NA	NA	NA	2	0	2	FALSE	125.5	-1.48231	0.631241	0.0384132	0.85009	NA	NA	-0.94182	0.506797
NA	NA	NA	2	0	2	FALSE	382.333	-0.343984	0.315597	0.0179741	0.428884	-0.0504567	0.721812	-0.19848	0.23976
NA	NA	NA	2	0	2	FALSE	281.667	-0.107666	0.365749	-0.31549	0.52121	-0.0113834	0.706247	-0.151125	0.275645
NA	NA	NA	2	0	2	FALSE	141	0.44561	0.653947	-1.39924	0.734401	NA	NA	-0.370267	0.488388
NA	NA	NA	2	0	2	FALSE	263.5	-0.628842	0.398717	-0.0584161	0.656424	NA	NA	-0.475107	0.340778
NA	NA	NA	2	0	2	FALSE	55.5	-0.603762	0.89588	-2.57915	1.43664	NA	NA	-1.15685	0.760184
NA	NA	NA	1	0	1	FALSE	38298	-0.0771615	0.113432	-0.121126	0.0742678	0.329911	0.315522	-0.0915888	0.0609638
NA	NA	NA	2	0	2	FALSE	125.5	-0.462683	0.607739	0.154874	0.85639	NA	NA	-0.255844	0.495621
NA	NA	NA	2	0	2	FALSE	72	-0.236037	0.813818	NA	NA	NA	NA	-0.236037	0.813818
NA	NA	NA	2	0	2	FALSE	292.333	-0.30287	0.334333	0.780128	0.523542	0.359426	0.843917	0.0458123	0.267274
NA	NA	NA	2	0	2	FALSE	105.5	-0.331465	0.608645	-0.634994	1.05277	NA	NA	-0.407502	0.526922
NA	NA	NA	2	0	2	FALSE	274.333	0.298444	0.416741	0.109735	0.460051	0.680457	0.742082	0.282352	0.285148
NA	NA	NA	2	0	2	FALSE	199.333	-0.237776	0.403738	0.899117	0.649611	-0.21997	0.872357	0.0389957	0.319136
NA	NA	NA	2	0	2	FALSE	69	-0.720022	0.770373	0.00550543	1.24816	NA	NA	-0.519879	0.655561
NA	NA	NA	2	0	2	FALSE	59	0.0893853	0.893921	NA	NA	NA	NA	0.0893853	0.893921
NA	NA	NA	2	0	2	FALSE	231	-1.05924	0.498972	-1.11177	0.59522	NA	NA	-1.08092	0.382385
NA	NA	NA	2	0	2	FALSE	77.5	-0.643371	0.687972	0.735617	1.28942	NA	NA	-0.337795	0.606979
NA	NA	NA	1	0	1	FALSE	26253	-0.0585209	0.115354	-0.00381039	0.0796209	0.169182	0.317535	-0.0136775	0.0641751
NA	NA	NA	2	0	2	FALSE	76	-0.26589	0.686607	-0.0181679	1.32103	NA	NA	-0.213203	0.609231
NA	NA	NA	2	0	2	FALSE	71.5	-0.252901	0.831214	1.31824	1.07942	NA	NA	0.331954	0.658576
NA	NA	NA	2	0	2	FALSE	238.333	0.607646	0.428639	-0.249732	0.483066	0.891527	0.956764	0.29675	0.304002
NA	NA	NA	2	0	2	FALSE	139	0.253889	0.564363	0.0408034	0.829858	NA	NA	0.186503	0.466671
NA	NA	NA	2	0	2	FALSE	66.5	-0.590858	0.792281	0.167255	1.24657	NA	NA	-0.372732	0.668657
NA	NA	NA	1	0	1	FALSE	4490	-0.119259	0.139201	-0.122947	0.136138	0.718918	0.371735	-0.0672507	0.0941553
NA	NA	NA	2	0	2	FALSE	61	0.175713	0.878597	NA	NA	NA	NA	0.175713	0.878597
NA	NA	NA	2	0	2	FALSE	68	-0.0264465	0.859949	0.338807	1.09849	NA	NA	0.112342	0.677137
NA	NA	NA	2	0	2	FALSE	217.5	-0.277434	0.516479	-0.175484	0.593045	NA	NA	-0.233461	0.389481
NA	NA	NA	2	0	2	FALSE	237.667	-0.729108	0.377687	-0.447809	0.562619	0.289073	0.951781	-0.550578	0.297834
NA	NA	NA	2	0	2	FALSE	99	-0.814585	0.638653	1.45405	1.05794	NA	NA	-0.208651	0.546751
NA	NA	NA	1	0	1	FALSE	49134	-0.127224	0.112549	-0.142286	0.0719186	0.116894	0.313637	-0.128748	0.0595019
NA	NA	NA	2	0	2	FALSE	195.5	-0.429222	0.480738	-0.670801	0.711641	NA	NA	-0.504921	0.39836
NA	NA	NA	2	0	2	FALSE	79.5	0.20893	0.864484	-2.22873	1.01902	NA	NA	-0.811238	0.65922
NA	NA	NA	2	0	2	FALSE	459.333	-0.45793	0.280471	-0.304479	0.408492	0.106598	0.708047	-0.359105	0.219794
NA	NA	NA	2	0	2	FALSE	50	NA	NA	-0.940021	1.33831	NA	NA	-0.940021	1.33831
NA	NA	NA	2	0	2	FALSE	115.5	0.0893853	0.634203	0.306565	0.881699	NA	NA	0.163438	0.514849
NA	NA	NA	2	0	2	FALSE	152.5	0.119463	0.605176	-1.12345	0.722344	NA	NA	-0.393141	0.46389
NA	NA	NA	2	0	2	FALSE	191.333	-0.493274	0.482339	-1.65031	0.573459	-0.0714131	0.917462	-0.847108	0.342451
NA	NA	NA	2	0	2	FALSE	90	0.719474	0.723038	NA	NA	NA	NA	0.719474	0.723038
NA	NA	NA	1	0	1	FALSE	32870.3	-0.0427937	0.11435	-0.0759587	0.0769855	-0.0471353	0.314406	-0.0648826	0.0625833
NA	NA	NA	2	0	2	FALSE	165	-0.0623411	0.488043	0.0943021	0.839422	NA	NA	-0.022768	0.421915
NA	NA	NA	2	0	2	FALSE	61	NA	NA	-2.01614	1.19406	-0.971193	1.05867	-1.43109	0.792156
NA	NA	NA	2	0	2	FALSE	295.333	-0.686412	0.355524	-0.219955	0.493216	0.263554	0.782766	-0.432435	0.270622
NA	NA	NA	2	0	2	FALSE	119.5	0.37954	0.685039	-0.440782	0.800313	NA	NA	0.0326606	0.520423
NA	NA	NA	2	0	2	FALSE	58	0.859824	0.911972	-1.63738	1.24781	NA	NA	-0.00964041	0.736286
NA	NA	NA	1	0	1	FALSE	5051.33	-0.0988981	0.139578	-0.106089	0.12953	0.110358	0.346043	-0.087841	0.0915613
NA	NA	NA	2	0	2	FALSE	53	-3.47544	1.23872	NA	NA	NA	NA	-3.47544	1.23872
NA	NA	NA	2	0	2	FALSE	95	-1.41997	0.733355	NA	NA	NA	NA	-1.41997	0.733355
NA	NA	NA	2	0	2	FALSE	92	-1.34387	0.683545	-0.312078	1.08241	NA	NA	-1.0497	0.577949
NA	NA	NA	1	0	1	FALSE	14285	-0.0839155	0.119727	-0.0961015	0.0915048	0.434929	0.328946	-0.0670855	0.0709894
NA	NA	NA	2	0	2	FALSE	76	NA	NA	-1.8208	1.11812	NA	NA	-1.8208	1.11812
NA	NA	NA	2	0	2	FALSE	145.5	0.143111	0.559623	-0.185569	0.800834	NA	NA	0.0352702	0.458719
NA	NA	NA	1	0	1	FALSE	25841.3	-0.213037	0.115374	-0.221396	0.0792501	0.198342	0.319805	-0.202012	0.0640023
NA	NA	NA	1	0	1	FALSE	7148.67	-0.0785994	0.12977	-0.079492	0.113933	0.206704	0.343373	-0.0623745	0.0830739
NA	NA	NA	1	0	1	FALSE	11569.3	-0.219173	0.121961	-0.162207	0.0971263	0.44616	0.335084	-0.153486	0.0740963
NA	NA	NA	2	0	2	FALSE	68	NA	NA	-1.8818	1.18544	NA	NA	-1.8818	1.18544
NA	NA	NA	1	0	1	FALSE	8124.67	-0.0758997	0.128229	-0.125432	0.110217	0.121525	0.33289	-0.0909886	0.0810676
NA	NA	NA	2	0	2	FALSE	257.333	-0.112393	0.408631	-1.16161	0.477369	0.426898	0.945092	-0.460362	0.294928
NA	NA	NA	2	0	2	FALSE	80	NA	NA	-1.63738	1.08107	NA	NA	-1.63738	1.08107
NA	NA	NA	1	0	1	FALSE	43919.7	-0.073104	0.112943	-0.0643914	0.072992	0.157882	0.314138	-0.0587098	0.0601688
NA	NA	NA	2	0	2	FALSE	115.5	0.370396	0.709512	-0.732805	0.806771	NA	NA	-0.110732	0.532787
NA	NA	NA	1	0	1	FALSE	3764.67	-0.00327352	0.147489	-0.387064	0.145422	0.230015	0.363255	-0.165718	0.0995849
NA	NA	NA	1	0	1	FALSE	11725.7	-0.0778252	0.121705	-0.054522	0.0963927	0.696048	0.336547	-0.0270524	0.0737277
NA	NA	NA	2	0	2	FALSE	54	NA	NA	-0.122789	1.27249	NA	NA	-0.122789	1.27249
NA	NA	NA	2	0	2	FALSE	204	-0.513134	0.445837	0.807017	0.748316	NA	NA	-0.167291	0.383012
NA	NA	NA	2	0	2	FALSE	97	NA	NA	-3.22594	1.12631	NA	NA	-3.22594	1.12631
NA	NA	NA	2	0	2	FALSE	70	-0.409606	0.827418	NA	NA	NA	NA	-0.409606	0.827418
NA	NA	NA	2	0	2	FALSE	83	0.43857	0.837089	-0.640481	0.946835	NA	NA	-0.0348236	0.62714
NA	NA	NA	2	0	2	FALSE	71	NA	NA	-1.36222	1.13603	NA	NA	-1.36222	1.13603
NA	NA	NA	2	0	2	FALSE	58	NA	NA	-2.01119	1.29229	NA	NA	-2.01119	1.29229
NA	NA	NA	1	0	1	FALSE	4765.67	-0.0732324	0.138063	-0.392927	0.129869	0.907065	0.384744	-0.177298	0.0918595
NA	NA	NA	2	0	2	FALSE	130	-1.14056	0.622711	NA	NA	NA	NA	-1.14056	0.622711
NA	NA	NA	2	0	2	FALSE	219	0.343374	0.444479	-0.392908	0.520909	0.905372	0.87857	0.14568	0.315557
NA	NA	NA	2	0	2	FALSE	188.667	0.0893853	0.512819	-0.840773	0.549059	-0.437965	0.873548	-0.358595	0.344416
NA	NA	NA	2	0	2	FALSE	249	-0.235772	0.416429	-1.38025	0.505048	-0.0160299	0.825179	-0.609047	0.299401
NA	NA	NA	2	0	2	FALSE	243	-0.360266	0.48126	-1.08595	0.48119	-0.196377	0.741716	-0.631567	0.309283
NA	NA	NA	2	0	2	FALSE	104	0.567323	0.680839	-0.379723	0.911822	NA	NA	0.22832	0.545539
NA	NA	NA	2	0	2	FALSE	148	0.137435	0.50233	-0.59606	0.679023	0.118499	1.01634	-0.0892117	0.375295
NA	NA	NA	1	0	1	FALSE	28112.7	-0.049321	0.114952	-0.158391	0.0783507	0.244138	0.317491	-0.109104	0.0634367
NA	NA	NA	2	0	2	FALSE	136.5	-0.125459	0.568465	-0.100516	0.84422	NA	NA	-0.117678	0.471529
NA	NA	NA	2	0	2	FALSE	113.5	-1.16908	0.753831	-0.418882	0.797219	NA	NA	-0.814948	0.547736
NA	NA	NA	2	0	2	FALSE	253.333	-0.557915	0.358971	-0.476954	0.559893	0.364336	0.927263	-0.448047	0.287321
NA	NA	NA	2	0	2	FALSE	125.5	0.139816	0.738374	-1.89725	0.765385	NA	NA	-0.842138	0.531402
NA	NA	NA	2	0	2	FALSE	89	-0.319658	0.826197	0.188789	0.89851	NA	NA	-0.0867148	0.60817
NA	NA	NA	2	0	2	FALSE	146.5	-0.498983	0.535353	-0.0840225	0.851001	NA	NA	-0.381325	0.453144
NA	NA	NA	2	0	2	FALSE	84	-0.0114959	0.694352	-0.925545	1.13935	NA	NA	-0.259037	0.592922
NA	NA	NA	2	0	2	FALSE	171.5	-0.236037	0.599001	-1.13317	0.661305	NA	NA	-0.640361	0.443954
NA	NA	NA	2	0	2	FALSE	113.333	0.337946	0.685268	-0.85495	0.726386	-0.5242	0.943397	-0.289349	0.440723
NA	NA	NA	2	0	2	FALSE	57.5	-1.21813	0.904097	-1.47698	1.30717	NA	NA	-1.30189	0.743573
NA	NA	NA	1	0	1	FALSE	10824.3	-0.154219	0.124741	-0.351994	0.098982	-0.121483	0.32646	-0.267352	0.0754386
NA	NA	NA	2	0	2	FALSE	51	-0.92467	0.978229	NA	NA	NA	NA	-0.92467	0.978229
NA	NA	NA	2	0	2	FALSE	129.5	-1.2228	0.571846	0.622256	0.917654	NA	NA	-0.706721	0.485325
NA	NA	NA	2	0	2	FALSE	58.5	-0.786083	0.899584	0.599638	1.23245	NA	NA	-0.304421	0.726612
NA	NA	NA	2	0	2	FALSE	89	-1.6716	0.738771	0.392481	1.02923	NA	NA	-0.969748	0.600166
NA	NA	NA	2	0	2	FALSE	54.5	0.051645	0.934178	0.477298	1.25538	NA	NA	0.203345	0.749445
NA	NA	NA	2	0	2	FALSE	69	-0.575188	0.835858	NA	NA	NA	NA	-0.575188	0.835858
NA	NA	NA	1	0	1	FALSE	2542	-0.0268625	0.159921	0.0128234	0.178759	0.213834	0.379599	0.0107961	0.113713
NA	NA	NA	2	0	2	FALSE	107.5	-0.923929	0.819825	-2.99955	0.902802	NA	NA	-1.86199	0.606924
NA	NA	NA	2	0	2	FALSE	170.5	-0.682014	0.517562	-0.345067	0.754522	NA	NA	-0.574201	0.426802
NA	NA	NA	2	0	2	FALSE	73	0.0768065	0.769822	-0.148164	1.1516	NA	NA	0.00732385	0.639994
NA	NA	NA	2	0	2	FALSE	194	0.15598	0.538197	-0.707964	0.63607	NA	NA	-0.204481	0.410857
NA	NA	NA	2	0	2	FALSE	103.5	0.904012	0.881312	-0.919696	0.781786	NA	NA	-0.11659	0.584842
NA	NA	NA	2	0	2	FALSE	231.667	0.172252	0.42708	-0.524326	0.509709	0.60813	0.883965	-0.0278494	0.306983
NA	NA	NA	2	0	2	FALSE	136.667	0.0439229	0.519821	-0.467896	0.717642	-0.691066	1.02161	-0.21333	0.389231
NA	NA	NA	2	0	2	FALSE	55	0.0622343	0.917471	0.152762	1.26952	NA	NA	0.0932937	0.74361
NA	NA	NA	2	0	2	FALSE	167	-0.493895	0.562732	-0.209496	0.701418	NA	NA	-0.382525	0.438932
NA	NA	NA	1	0	1	FALSE	15701.3	-0.0844222	0.119239	-0.134796	0.0891921	0.282776	0.324405	-0.0982539	0.0697513
NA	NA	NA	2	0	2	FALSE	161.5	0.70519	0.602464	-0.525132	0.680065	NA	NA	0.1642	0.450958
NA	NA	NA	2	0	2	FALSE	58	-0.857542	0.916408	NA	NA	NA	NA	-0.857542	0.916408
NA	NA	NA	2	0	2	FALSE	90.5	-0.26729	0.890562	-0.409601	0.85403	NA	NA	-0.341424	0.616401
NA	NA	NA	2	0	2	FALSE	119	-0.352447	0.701068	-1.13793	0.805018	NA	NA	-0.69123	0.528688
NA	NA	NA	2	0	2	FALSE	94.5	-2.17238	0.685897	-0.240239	1.12743	NA	NA	-1.65044	0.585977
NA	NA	NA	2	0	1	FALSE	82	NA	NA	-0.246764	1.03457	NA	NA	-0.246764	1.03457
NA	NA	NA	2	0	2	FALSE	133	-0.182732	0.535695	0.317348	0.951947	NA	NA	-0.0624584	0.466851
NA	NA	NA	2	0	2	FALSE	66	-1.65792	0.887266	NA	NA	NA	NA	-1.65792	0.887266
NA	NA	NA	2	0	2	FALSE	81	0.466277	0.813415	-1.09082	0.996303	NA	NA	-0.156503	0.630088
NA	NA	NA	1	0	1	FALSE	5722	-0.0377723	0.136179	-0.309575	0.126435	-0.189641	0.337949	-0.184156	0.0893587
NA	NA	NA	2	0	2	FALSE	69	-1.17431	0.849538	NA	NA	NA	NA	-1.17431	0.849538
NA	NA	NA	2	0	2	FALSE	124	NA	NA	-1.15644	0.855501	NA	NA	-1.15644	0.855501
NA	NA	NA	2	0	2	FALSE	182	-0.635713	0.557418	-0.795506	0.661222	NA	NA	-0.702097	0.426185
NA	NA	NA	2	0	2	FALSE	158.333	-1.11101	0.523531	-1.22525	0.618832	-0.409583	1.09079	-1.07	0.375286
NA	NA	NA	2	0	2	FALSE	352.5	-0.235111	0.353237	-0.727154	0.55626	NA	NA	-0.376509	0.298194
NA	NA	NA	2	0	2	FALSE	174	-0.334429	0.474804	-0.434143	0.594806	0.233775	1.0773	-0.308856	0.350846
NA	NA	NA	2	0	2	FALSE	261.667	0.0937363	0.383327	-0.395896	0.496897	0.292464	0.879881	-0.0483839	0.286919
NA	NA	NA	2	0	2	FALSE	170	0.516015	0.508376	0.398321	0.611269	-0.483202	0.843231	0.299682	0.354619
NA	NA	NA	2	0	2	FALSE	79	-0.0441461	0.860131	-1.00258	0.978308	NA	NA	-0.462005	0.645967
NA	NA	NA	2	0	2	FALSE	155	-0.368922	0.457731	1.28952	0.703523	0.0256089	1.06866	0.113053	0.361104
NA	NA	NA	1	0	1	FALSE	22660.7	-0.0785979	0.116045	0.0304934	0.0822037	0.40001	0.319961	0.0111344	0.0656517
NA	NA	NA	2	0	2	FALSE	69	NA	NA	-1.37006	1.15262	NA	NA	-1.37006	1.15262
NA	NA	NA	2	0	2	FALSE	215.333	-0.0717874	0.435742	-0.351537	0.533647	1.26632	0.919858	-0.0116376	0.316861
NA	NA	NA	2	0	2	FALSE	92.5	-0.831772	0.691002	0.359311	1.02943	NA	NA	-0.461801	0.573732
NA	NA	NA	2	0	2	FALSE	55	NA	NA	-1.21934	1.28486	NA	NA	-1.21934	1.28486
NA	NA	NA	2	0	2	FALSE	204	0.138175	0.533717	0.159608	0.607102	NA	NA	0.147519	0.400843
NA	NA	NA	2	0	2	FALSE	78.5	-1.2016	0.910938	-1.48081	0.976306	NA	NA	-1.33154	0.666042
NA	NA	NA	2	0	2	FALSE	169.5	-0.763392	0.522556	-1.57083	0.773335	NA	NA	-1.0165	0.432976
NA	NA	NA	2	0	2	FALSE	96	-0.485979	0.709786	NA	NA	NA	NA	-0.485979	0.709786
NA	NA	NA	2	0	2	FALSE	116	0.445297	0.603476	-0.0791605	0.802924	-0.480572	0.87852	0.0853386	0.422853
NA	NA	NA	2	0	2	FALSE	97	-0.10338	0.561154	1.01831	1.04567	-1.23688	1.02867	-0.112388	0.445644
NA	NA	NA	2	0	2	FALSE	271.333	-0.489678	0.393215	-0.409911	0.490996	0.254386	0.75904	-0.358328	0.284541
NA	NA	NA	2	0	2	FALSE	191.667	0.622385	0.467287	-0.180708	0.55602	0.534059	0.957511	0.319855	0.335108
NA	NA	NA	2	0	2	FALSE	50	-1.7432	1.02251	NA	NA	NA	NA	-1.7432	1.02251
NA	NA	NA	2	0	2	FALSE	346	-0.0945	0.365258	-0.922284	0.424581	-0.0273531	0.680755	-0.387057	0.25649
NA	NA	NA	2	0	2	FALSE	254.667	-0.0251977	0.380269	0.186381	0.533524	0.548916	0.785302	0.113743	0.288075
NA	NA	NA	2	0	2	FALSE	64	NA	NA	-0.507934	1.1744	NA	NA	-0.507934	1.1744
NA	NA	NA	2	0	2	FALSE	68	0.49485	0.876262	0.824646	1.07382	NA	NA	0.626677	0.678906
NA	NA	NA	2	0	2	FALSE	203.667	-1.05424	0.427767	-0.530064	0.56929	0.160159	1.06805	-0.769746	0.325694
NA	NA	NA	2	0	2	FALSE	53	NA	NA	-0.933713	1.29979	NA	NA	-0.933713	1.29979
NA	NA	NA	1	0	1	FALSE	32712	-0.130139	0.114277	-0.103807	0.076464	0.12072	0.31547	-0.102877	0.0622986
NA	NA	NA	2	0	2	FALSE	94	0.0341226	0.715492	-0.278601	0.96179	NA	NA	-0.0772871	0.574066
NA	NA	NA	2	0	2	FALSE	76	-0.21962	0.777424	0.375882	1.09072	NA	NA	-0.0190056	0.633072
NA	NA	NA	2	0	2	FALSE	346	-0.957934	0.343279	0.352126	0.438225	0.546948	0.73472	-0.339788	0.253626
NA	NA	NA	2	0	2	FALSE	146.5	-0.337586	0.587443	0.121675	0.758477	NA	NA	-0.165389	0.464435
NA	NA	NA	2	0	2	FALSE	67	0.0278274	0.840269	NA	NA	NA	NA	0.0278274	0.840269
NA	NA	NA	2	0	2	FALSE	229.333	-0.597473	0.401943	-0.143701	0.554858	-1.07186	0.869806	-0.518763	0.304861
NA	NA	NA	2	0	2	FALSE	142.5	-0.718831	0.520665	1.29891	0.924532	NA	NA	-0.232982	0.453669
NA	NA	NA	2	0	2	FALSE	107.5	-0.586812	0.645852	-0.36631	0.947989	NA	NA	-0.516911	0.533752
NA	NA	NA	2	0	2	FALSE	188.5	-0.224757	0.477138	-0.318837	0.742489	NA	NA	-0.252254	0.401402
NA	NA	NA	2	0	2	FALSE	127.5	-0.526801	0.624723	-0.3807	0.823798	NA	NA	-0.473457	0.497777
NA	NA	NA	2	0	2	FALSE	83.5	-0.3626	0.69772	0.465724	1.12941	NA	NA	-0.133797	0.593585
NA	NA	NA	2	0	2	FALSE	102	-0.429739	0.63354	0.741842	1.02127	NA	NA	-0.10417	0.538364
NA	NA	NA	2	0	2	FALSE	178	-0.71316	0.508863	-0.653683	0.739065	NA	NA	-0.694032	0.419124
NA	NA	NA	2	0	2	FALSE	94.5	0.130885	0.636535	0.0143638	1.10878	NA	NA	0.102002	0.552034
NA	NA	NA	2	0	2	FALSE	144.5	-0.558978	0.611074	-0.445381	0.748313	NA	NA	-0.513532	0.473312
NA	NA	NA	2	0	2	FALSE	106.5	0.125033	0.621446	0.596773	0.98701	NA	NA	0.258953	0.525889
NA	NA	NA	2	0	2	FALSE	61.5	-0.823125	0.85915	-2.28313	1.32654	NA	NA	-1.25457	0.721119
NA	NA	NA	2	0	2	FALSE	82.5	-0.244621	0.768235	-0.367924	1.02366	NA	NA	-0.289046	0.614446
NA	NA	NA	1	0	1	FALSE	11359.7	-0.00953711	0.122258	-0.173421	0.0971855	0.634768	0.336089	-0.0736629	0.0741999
NA	NA	NA	2	0	2	FALSE	64	NA	NA	-1.18838	1.19032	NA	NA	-1.18838	1.19032
NA	NA	NA	2	0	2	FALSE	130	0.344369	0.59311	0.113466	0.839298	NA	NA	0.267465	0.484371
NA	NA	NA	2	0	2	FALSE	95.5	-0.378212	0.760691	-0.239566	0.901915	NA	NA	-0.320581	0.581485
NA	NA	NA	2	0	2	FALSE	79	NA	NA	-2.24155	1.12395	NA	NA	-2.24155	1.12395
NA	NA	NA	2	0	2	FALSE	78	-0.452531	0.702256	0.569325	1.22198	NA	NA	-0.198836	0.608873
NA	NA	NA	2	0	2	FALSE	133	-0.223556	0.574779	0.416638	0.854939	NA	NA	-0.0242696	0.477
NA	NA	NA	2	0	2	FALSE	122	-0.297952	0.627183	-0.258026	0.852499	NA	NA	-0.283931	0.505193
NA	NA	NA	2	0	2	FALSE	91	-1.12021	0.649562	0.205265	1.17514	NA	NA	-0.810003	0.568494
NA	NA	NA	2	0	2	FALSE	76	-1.6904	0.79418	-0.277276	1.12789	NA	NA	-1.222	0.649356
NA	NA	NA	2	0	2	FALSE	76	NA	NA	-3.16391	1.26049	NA	NA	-3.16391	1.26049
NA	NA	NA	2	0	2	FALSE	100	-1.54537	0.719407	NA	NA	NA	NA	-1.54537	0.719407
NA	NA	NA	2	0	2	FALSE	92	0.0449336	0.719195	NA	NA	NA	NA	0.0449336	0.719195
NA	NA	NA	1	0	1	FALSE	4263.33	0.0299839	0.142485	-0.147827	0.139689	0.111562	0.357865	-0.048266	0.0960862
NA	NA	NA	2	0	2	FALSE	80	NA	NA	-2.74266	1.16628	NA	NA	-2.74266	1.16628
NA	NA	NA	2	0	2	FALSE	72	0.272864	0.809103	NA	NA	NA	NA	0.272864	0.809103
NA	NA	NA	2	0	2	FALSE	82	-1.25435	0.739913	0.370953	1.09828	NA	NA	-0.746958	0.613645
NA	NA	NA	2	0	2	FALSE	84.5	0.0152773	0.784909	-1.4576	1.00157	NA	NA	-0.545122	0.617799
NA	NA	NA	2	0	2	FALSE	514.333	-0.532018	0.277669	-0.427608	0.368614	0.310029	0.672816	-0.415395	0.210637
NA	NA	NA	2	0	2	FALSE	264.333	-0.253105	0.38184	-0.31634	0.525997	-0.0211308	0.73607	-0.236902	0.284916
NA	NA	NA	2	0	2	FALSE	107	-0.022882	0.651141	-0.635761	0.937383	NA	NA	-0.222357	0.534779
NA	NA	NA	2	0	2	FALSE	156	0.399902	0.512738	0.292491	0.643816	0.543789	0.915441	0.388102	0.36737
NA	NA	NA	2	0	2	FALSE	69	-1.70237	0.870232	NA	NA	NA	NA	-1.70237	0.870232
NA	NA	NA	2	0	2	FALSE	247.5	-0.674103	0.437621	0.712176	0.61555	NA	NA	-0.208671	0.35667
NA	NA	NA	2	0	2	FALSE	277.333	-0.222394	0.351271	0.638201	0.512124	0.0696334	0.89045	0.0545471	0.275467
NA	NA	NA	2	0	2	FALSE	251	-0.176724	0.396954	-0.472094	0.499433	0.875433	0.909292	-0.169082	0.294056
NA	NA	NA	2	0	2	FALSE	517.333	-0.278962	0.278593	0.039229	0.361113	0.406648	0.674391	-0.105456	0.20965
NA	NA	NA	2	0	2	FALSE	298.333	-0.239046	0.365922	-0.856133	0.481208	0.144924	0.74062	-0.383418	0.271064
NA	NA	NA	2	0	2	FALSE	63.5	0.309785	0.803387	0.0420938	1.27062	NA	NA	0.233332	0.67904
NA	NA	NA	2	0	2	FALSE	124	-0.0476943	0.630059	0.343836	0.828073	NA	NA	0.0958637	0.501418
NA	NA	NA	2	0	2	FALSE	189.667	-0.221181	0.473006	-0.46079	0.549365	0.288088	1.05828	-0.260278	0.339502
NA	NA	NA	2	0	2	FALSE	73.5	-0.175094	0.818724	-0.769918	1.08249	NA	NA	-0.39154	0.652989
NA	NA	NA	1	0	1	FALSE	33165.3	-0.0791163	0.11414	-0.0626774	0.0758625	0.313285	0.316377	-0.0531028	0.061957
NA	NA	NA	2	0	2	FALSE	111.5	0.110892	0.718691	-1.1626	0.832586	NA	NA	-0.432856	0.544039
NA	NA	NA	2	0	2	FALSE	63.5	-0.812517	0.840348	-0.296098	1.23018	NA	NA	-0.648208	0.6939
NA	NA	NA	2	0	2	FALSE	356.333	-0.0566346	0.313179	0.262571	0.465615	-0.133134	0.738947	0.0234317	0.245148
NA	NA	NA	2	0	2	FALSE	50	NA	NA	0.811011	1.3145	NA	NA	0.811011	1.3145
NA	NA	NA	2	0	2	FALSE	159.5	-0.0929362	0.483785	0.106125	0.894946	NA	NA	-0.0479209	0.425583
NA	NA	NA	2	0	2	FALSE	255.667	0.100559	0.37732	0.211414	0.517185	-0.0947764	0.871785	0.113592	0.287738
NA	NA	NA	2	0	2	FALSE	151.5	-0.338481	0.556105	0.315379	0.775413	NA	NA	-0.116401	0.451904
NA	NA	NA	2	0	2	FALSE	211	-0.582797	0.461287	-0.0930032	0.687405	NA	NA	-0.430718	0.383036
NA	NA	NA	2	0	2	FALSE	91	-0.479892	0.728494	NA	NA	NA	NA	-0.479892	0.728494
NA	NA	NA	2	0	2	FALSE	214.667	0.60414	0.439555	0.000352595	0.537739	0.630313	0.856099	0.398874	0.316252
NA	NA	NA	2	0	2	FALSE	260.667	-0.33415	0.382786	-0.823342	0.524371	-0.102502	0.783904	-0.450136	0.287612
NA	NA	NA	2	0	2	FALSE	128	0.234319	0.660895	0.17057	0.770905	NA	NA	0.207314	0.501751
NA	NA	NA	2	0	2	FALSE	81	NA	NA	-1.9393	1.08969	NA	NA	-1.9393	1.08969
NA	NA	NA	2	0	2	FALSE	478	-0.197791	0.287965	-0.676198	0.396407	-0.0936257	0.608872	-0.328636	0.217595
NA	NA	NA	2	0	2	FALSE	386.333	-0.909697	0.32445	-0.107702	0.420099	-0.353125	0.701204	-0.579675	0.241124
NA	NA	NA	2	0	2	FALSE	149.5	-0.0881856	0.618118	-0.863526	0.720226	NA	NA	-0.417044	0.469059
NA	NA	NA	2	0	2	FALSE	214.333	0.642603	0.466244	-0.482789	0.552307	-0.237892	0.724785	0.0941042	0.319732
NA	NA	NA	2	0	2	FALSE	70	NA	NA	-0.581181	1.12428	NA	NA	-0.581181	1.12428
NA	NA	NA	2	0	2	FALSE	164.333	-0.405585	0.476369	-0.961298	0.636313	0.706441	1.07583	-0.458772	0.359431
NA	NA	NA	2	0	2	FALSE	304.667	-0.241051	0.341983	-0.261709	0.471706	0.758039	0.944321	-0.168516	0.265689
NA	NA	NA	2	0	2	FALSE	256.333	0.107568	0.392321	-0.306312	0.505413	0.223803	0.820624	-0.014116	0.289925
NA	NA	NA	2	0	2	FALSE	85	-0.508452	0.664503	0.633449	1.20113	NA	NA	-0.240858	0.581453
NA	NA	NA	2	0	2	FALSE	403	-0.114676	0.309161	-0.635291	0.416018	0.410714	0.718373	-0.22415	0.234545
NA	NA	NA	2	0	2	FALSE	426	0.0467468	0.310342	0.123568	0.409121	0.0659323	0.610799	0.073556	0.229188
NA	NA	NA	2	0	2	FALSE	65	0.290755	0.850667	NA	NA	NA	NA	0.290755	0.850667
NA	NA	NA	2	0	2	FALSE	135	-0.495548	0.591048	0.620771	0.817307	NA	NA	-0.112219	0.478936
NA	NA	NA	2	0	2	FALSE	244.667	-0.143198	0.405674	0.0337983	0.488123	0.522525	1.02302	-0.0203939	0.298422
NA	NA	NA	2	0	2	FALSE	100.5	-0.392004	0.6752	0.0467624	0.958784	NA	NA	-0.246544	0.552048
NA	NA	NA	1	0	1	FALSE	44245.7	-0.0787904	0.112825	-0.118335	0.0727586	0.327778	0.314906	-0.0909331	0.0600255
NA	NA	NA	2	0	2	FALSE	174	-0.52529	0.503206	-0.233879	0.760924	NA	NA	-0.436624	0.419727
NA	NA	NA	2	0	2	FALSE	98	-0.521241	0.721351	0.168511	0.920094	NA	NA	-0.258672	0.567685
NA	NA	NA	2	0	2	FALSE	486.333	-0.160269	0.282597	-0.28158	0.382242	0.518335	0.665616	-0.127831	0.215051
NA	NA	NA	2	0	2	FALSE	61.5	-0.373745	0.907082	-0.818661	1.17129	NA	NA	-0.540543	0.717169
NA	NA	NA	2	0	2	FALSE	136	-0.145653	0.572301	-0.546623	0.845265	NA	NA	-0.271688	0.473896
NA	NA	NA	2	0	2	FALSE	62	-0.283819	0.883563	0.956567	1.17077	NA	NA	0.166286	0.705261
NA	NA	NA	2	0	2	FALSE	327.667	-0.0895805	0.331549	-0.214094	0.468598	1.12818	0.790943	0.000882403	0.256076
NA	NA	NA	2	0	2	FALSE	99	-0.510671	0.629437	-0.617604	1.08688	NA	NA	-0.537528	0.54469
NA	NA	NA	2	0	2	FALSE	225	-0.380618	0.483565	-0.794643	0.61409	NA	NA	-0.539085	0.379915
NA	NA	NA	2	0	2	FALSE	82.5	0.0136735	0.70465	-1.5761	1.16098	NA	NA	-0.41431	0.602379
NA	NA	NA	2	0	2	FALSE	254.333	-0.134507	0.389543	-0.596414	0.494903	0.855533	0.977018	-0.20692	0.292097
NA	NA	NA	2	0	2	FALSE	471	-0.0746177	0.300498	-0.646942	0.382881	-0.171917	0.607942	-0.276901	0.220319
NA	NA	NA	2	0	2	FALSE	140	-0.225108	0.61924	0.081278	0.753803	NA	NA	-0.101656	0.478489
NA	NA	NA	2	0	2	FALSE	206.333	-0.0436716	0.408302	0.820669	0.610054	-0.731071	0.866467	0.0967704	0.315953
NA	NA	NA	2	0	2	FALSE	110.667	0.441606	0.724345	-1.17726	0.688865	0.642649	1.08581	-0.22506	0.453541
NA	NA	NA	2	0	2	FALSE	124.5	-0.449611	0.607599	-0.928621	0.87591	NA	NA	-0.605225	0.499243
NA	NA	NA	2	0	2	FALSE	199	-0.343543	0.39674	0.534825	0.665179	-0.616605	0.899258	-0.17628	0.31863
NA	NA	NA	2	0	2	FALSE	136.333	-0.0159752	0.520166	0.530968	0.771829	1.11193	0.864269	0.345713	0.385952
NA	NA	NA	2	0	2	FALSE	103.5	-0.757913	0.683313	-0.68317	0.933514	NA	NA	-0.731837	0.551383
NA	NA	NA	2	0	2	FALSE	131	-0.216873	0.546862	0.4648	0.936668	NA	NA	-0.0435823	0.472264
NA	NA	NA	2	0	2	FALSE	140.5	0.273258	0.547142	0.670768	0.850301	NA	NA	0.389654	0.460116
NA	NA	NA	2	0	2	FALSE	146.667	0.190805	0.521838	-0.155903	0.666824	0.249706	0.971663	0.0880397	0.378497
NA	NA	NA	2	0	2	FALSE	138.5	0.376134	0.597219	-1.21934	0.798302	NA	NA	-0.196384	0.478208
NA	NA	NA	2	0	2	FALSE	230.667	0.286027	0.435757	-0.480125	0.539666	-0.0709174	0.726541	-0.0261063	0.307229
NA	NA	NA	2	0	2	FALSE	126.667	0.102044	0.554684	-0.745737	0.727044	0.66341	1.04815	-0.0785296	0.406483
NA	NA	NA	2	0	2	FALSE	68	NA	NA	-1.18444	1.15475	NA	NA	-1.18444	1.15475
NA	NA	NA	2	0	2	FALSE	184.5	-0.21036	0.590397	-0.772514	0.624322	NA	NA	-0.475749	0.428966
NA	NA	NA	1	0	1	FALSE	19308.3	-0.0157354	0.117364	-0.0238348	0.0855087	0.172061	0.320324	-0.0124379	0.0675566
NA	NA	NA	2	0	2	FALSE	82.5	-1.08435	0.807679	-0.520853	0.996603	NA	NA	-0.860963	0.627486
NA	NA	NA	2	0	2	FALSE	158	0.673506	0.536095	-0.241258	0.609273	0.1031	0.940008	0.247803	0.369988
NA	NA	NA	2	0	2	FALSE	80.5	0.0627171	0.909498	-1.31465	0.93791	NA	NA	-0.604786	0.652926
NA	NA	NA	2	0	2	FALSE	89	NA	NA	-0.437463	0.99547	NA	NA	-0.437463	0.99547
NA	NA	NA	2	0	2	FALSE	131.5	0.13135	0.585987	0.112076	0.842694	NA	NA	0.125068	0.481103
NA	NA	NA	2	0	2	FALSE	61	0.289311	0.87768	NA	NA	NA	NA	0.289311	0.87768
NA	NA	NA	2	0	2	FALSE	95.5	-1.49624	0.786224	-0.834021	0.909774	NA	NA	-1.21312	0.594867
NA	NA	NA	2	0	2	FALSE	163	0.230464	0.495821	-0.12216	0.604776	0.40434	1.08651	0.123675	0.361577
NA	NA	NA	2	0	2	FALSE	182.667	-0.334809	0.442062	0.350208	0.66754	-0.884481	0.8191	-0.253697	0.336112
NA	NA	NA	2	0	2	FALSE	75	NA	NA	-1.86187	1.12779	NA	NA	-1.86187	1.12779
NA	NA	NA	2	0	2	FALSE	187	0.356014	0.4953	-0.408822	0.619555	-0.469319	0.714452	-0.0617191	0.340196
NA	NA	NA	2	0	2	FALSE	221	-0.461714	0.368907	0.601568	0.642719	-0.138702	0.923405	-0.191843	0.302316
NA	NA	NA	2	0	2	FALSE	136.333	0.388515	0.56195	0.298689	0.662744	0.576535	1.01483	0.385094	0.394841
NA	NA	NA	2	0	2	FALSE	108	-0.0551959	0.678228	-1.00495	0.89664	NA	NA	-0.400842	0.540914
NA	NA	NA	2	0	2	FALSE	154.667	-0.800292	0.458899	0.225591	0.719044	-0.134712	1.05119	-0.459407	0.363032
NA	NA	NA	2	0	2	FALSE	125.333	-0.437577	0.527484	0.19885	0.778686	-0.146951	1.04249	-0.223893	0.402801
NA	NA	NA	2	0	2	FALSE	63.5	-0.0283977	0.866658	0.0815245	1.16702	NA	NA	0.0106751	0.695782
NA	NA	NA	2	0	2	FALSE	107	NA	NA	0.247475	0.902314	NA	NA	0.247475	0.902314
NA	NA	NA	2	0	2	FALSE	64.5	-1.0818	0.992567	-0.653781	1.05971	NA	NA	-0.881777	0.724424
NA	NA	NA	2	0	2	FALSE	194.5	-0.191948	0.556613	-0.280969	0.617291	NA	NA	-0.231869	0.413377
NA	NA	NA	2	0	2	FALSE	113	0.0941815	0.677094	-0.0126852	0.846982	NA	NA	0.0525144	0.528871
NA	NA	NA	2	0	2	FALSE	199.333	0.0674064	0.442266	-1.19441	0.57275	0.710774	0.957107	-0.27241	0.328753
NA	NA	NA	2	0	2	FALSE	151	-0.409211	0.572682	-0.552017	0.761485	NA	NA	-0.460802	0.457693
NA	NA	NA	2	0	2	FALSE	124.5	-0.562089	0.513664	0.68467	1.191	NA	NA	-0.366552	0.471666
NA	NA	NA	2	0	2	FALSE	72	-0.369568	0.8155	NA	NA	NA	NA	-0.369568	0.8155
NA	NA	NA	1	0	1	FALSE	14307.7	-0.136868	0.119745	-0.091577	0.092453	0.348709	0.325992	-0.0865581	0.0714025
NA	NA	NA	2	0	2	FALSE	77	-0.79136	0.800978	-0.777591	1.06872	NA	NA	-0.786408	0.640944
NA	NA	NA	2	0	2	FALSE	187	-0.651083	0.460085	0.062073	0.571858	0.300997	1.04923	-0.300628	0.339218
NA	NA	NA	2	0	2	FALSE	97.5	-1.3156	0.685836	0.161398	1.00084	NA	NA	-0.843647	0.565747
NA	NA	NA	2	0	2	FALSE	85.5	0.681791	0.882351	-1.15101	0.903838	NA	NA	-0.212567	0.631376
NA	NA	NA	2	0	2	FALSE	113	-1.56397	0.638511	0.331045	0.942144	NA	NA	-0.967528	0.528561
NA	NA	NA	2	0	2	FALSE	74	0.3498	0.772607	0.639534	1.12025	NA	NA	0.443191	0.636014
NA	NA	NA	2	0	2	FALSE	159.5	-0.277191	0.579034	-1.37135	0.727434	NA	NA	-0.701568	0.453034
NA	NA	NA	2	0	2	FALSE	103	-0.4427	0.685304	NA	NA	NA	NA	-0.4427	0.685304
NA	NA	NA	2	0	2	FALSE	119	-0.184212	0.713686	-0.823595	0.788333	NA	NA	-0.472206	0.529079
NA	NA	NA	2	0	2	FALSE	204.5	-0.503879	0.458776	0.536122	0.713551	NA	NA	-0.199703	0.385896
NA	NA	NA	2	0	2	FALSE	167	0.101706	0.629016	0.370151	0.640507	NA	NA	0.233499	0.448789
NA	NA	NA	2	0	2	FALSE	58	0.566904	0.89785	NA	NA	NA	NA	0.566904	0.89785
NA	NA	NA	2	0	2	FALSE	53	-1.80147	0.997036	NA	NA	NA	NA	-1.80147	0.997036
NA	NA	NA	2	0	2	FALSE	78.5	-0.940234	0.881827	-0.563499	0.970439	NA	NA	-0.769848	0.65263
NA	NA	NA	2	0	2	FALSE	59	-1.50325	0.930225	NA	NA	NA	NA	-1.50325	0.930225
NA	NA	NA	2	0	2	FALSE	61	NA	NA	-1.9814	1.25808	NA	NA	-1.9814	1.25808
NA	NA	NA	1	0	1	FALSE	3693.33	-0.0564833	0.149816	-0.196757	0.145601	-0.00682553	0.359316	-0.119137	0.100266
NA	NA	NA	2	0	2	FALSE	142	NA	NA	-2.75693	0.877659	NA	NA	-2.75693	0.877659
NA	NA	NA	2	0	2	FALSE	64	NA	NA	-1.70231	1.21158	NA	NA	-1.70231	1.21158
NA	NA	NA	2	0	2	FALSE	76	-1.39699	0.778108	-2.0907	1.19934	NA	NA	-1.60249	0.652763
NA	NA	NA	2	0	2	FALSE	410.667	0.177107	0.332853	-0.315046	0.424304	-1.26025	0.552828	-0.239459	0.236674
NA	NA	NA	3	0	3	FALSE	76	-1.75644	0.832483	NA	NA	NA	NA	-1.75644	0.832483
NA	NA	NA	3	0	3	FALSE	59	NA	NA	-3.4231	1.4898	NA	NA	-3.4231	1.4898
NA	NA	NA	2	0	2	FALSE	340.667	-0.0582507	0.321435	-0.411944	0.502511	0.154029	0.661351	-0.115728	0.250588
NA	NA	NA	2	0	2	FALSE	69	-0.509733	0.823155	0.248481	1.13928	NA	NA	-0.249676	0.66722
NA	NA	NA	2	0	2	FALSE	111	-0.830819	0.621723	0.170006	0.962936	NA	NA	-0.536358	0.522315
NA	NA	NA	2	0	2	FALSE	519	-0.07237	0.296013	0.0363072	0.366876	-0.0950437	0.541259	-0.0395677	0.211974
NA	NA	NA	2	0	2	FALSE	462	-0.461299	0.295272	0.115506	0.420537	-0.609865	0.556038	-0.324698	0.221628
NA	NA	NA	2	0	2	FALSE	102.333	-0.0735451	0.581333	0.0456389	0.883361	0.497706	1.06685	0.0543357	0.441978
NA	NA	NA	2	0	2	FALSE	361.667	-0.244742	0.349134	-0.137192	0.431673	-0.223142	0.63011	-0.205487	0.249308
NA	NA	NA	2	0	2	FALSE	248.667	-0.287616	0.379547	0.118533	0.556487	0.258039	0.77658	-0.100255	0.290753
NA	NA	NA	2	0	2	FALSE	455	-0.12404	0.291347	0.030444	0.419592	-0.416557	0.586748	-0.122675	0.221591
NA	NA	NA	2	0	2	FALSE	417	-0.212218	0.289527	0.104059	0.489151	-0.588263	0.577171	-0.202118	0.22875
NA	NA	NA	2	0	2	FALSE	90.5	0.207168	0.88551	-2.05365	0.898017	NA	NA	-0.907389	0.630525
NA	NA	NA	2	0	2	FALSE	612.333	-0.168209	0.272052	-0.212914	0.350742	-0.245414	0.501061	-0.194393	0.197553
NA	NA	NA	2	0	2	FALSE	372	-0.125633	0.347506	-0.0376283	0.451678	-0.0529986	0.558267	-0.0850973	0.247
NA	NA	NA	2	0	2	FALSE	62	0.0140359	0.873078	-0.79425	1.19867	NA	NA	-0.26614	0.705721
NA	NA	NA	2	0	2	FALSE	160	-0.801009	0.554498	-0.173962	0.745967	NA	NA	-0.577848	0.445019
NA	NA	NA	2	0	2	FALSE	264.333	-0.121924	0.400158	-0.343921	0.486733	0.586153	0.791711	-0.105955	0.287938
NA	NA	NA	2	0	2	FALSE	86	0.100946	0.742855	NA	NA	NA	NA	0.100946	0.742855
NA	NA	NA	1	0	1	FALSE	50538.3	-0.109279	0.112711	-0.101149	0.0720919	-0.220564	0.312263	-0.107776	0.0596145
NA	NA	NA	2	0	2	FALSE	122.333	-0.337867	0.530951	-0.189011	0.783982	-0.104616	1.08875	-0.264924	0.407642
NA	NA	NA	2	0	2	FALSE	116	-0.676521	0.655288	-0.376196	0.706675	-0.181078	1.02587	-0.473518	0.435134
NA	NA	NA	2	0	2	FALSE	472.333	0.738163	0.30833	0.157317	0.401699	-0.405319	0.519943	0.354652	0.221322
NA	NA	NA	2	0	2	FALSE	86	NA	NA	-2.69692	1.11969	NA	NA	-2.69692	1.11969
NA	NA	NA	2	0	2	FALSE	159	0.0243528	0.597039	-0.674233	0.698041	NA	NA	-0.270788	0.453717
NA	NA	NA	2	0	2	FALSE	101	NA	NA	-1.5515	0.959322	NA	NA	-1.5515	0.959322
NA	NA	NA	2	0	2	FALSE	373.333	0.0105722	0.321759	-0.469466	0.435093	-0.0920594	0.700258	-0.151085	0.242672
NA	NA	NA	2	0	2	FALSE	102	-0.264672	0.66476	-0.129505	0.791816	-0.134712	1.02561	-0.194144	0.456028
NA	NA	NA	2	0	2	FALSE	182.667	-0.557422	0.446203	-0.127038	0.613692	0.47277	0.992206	-0.305606	0.339155
NA	NA	NA	2	0	2	FALSE	88	-0.603762	0.738223	-0.52818	0.881136	-0.851788	1.00016	-0.640291	0.492508
NA	NA	NA	2	0	2	FALSE	266.333	-0.581034	0.347707	1.13004	0.578491	-0.292158	0.78787	-0.147609	0.278742
NA	NA	NA	2	0	2	FALSE	445.667	-0.231087	0.302383	0.0664951	0.43585	-0.284211	0.538427	-0.160692	0.225588
NA	NA	NA	2	0	2	FALSE	185	-0.312104	0.446024	-0.0426328	0.629406	-0.616981	0.87475	-0.280292	0.335997
NA	NA	NA	2	0	2	FALSE	94	-2.84447	0.833614	NA	NA	NA	NA	-2.84447	0.833614
NA	NA	NA	2	0	2	FALSE	441.667	-0.116933	0.30354	-0.330563	0.41825	-0.4702	0.576744	-0.233566	0.226014
NA	NA	NA	2	0	2	FALSE	532.667	0.220057	0.300536	-0.517484	0.356529	-0.354463	0.531158	-0.12859	0.210898
NA	NA	NA	2	0	2	FALSE	254.667	0.124945	0.471097	-0.643532	0.502761	-0.0303408	0.620616	-0.186441	0.300715
NA	NA	NA	2	0	2	FALSE	206	-0.0755969	0.434985	-0.785503	0.595697	0.0874446	0.792925	-0.255223	0.321186
NA	NA	NA	2	0	2	FALSE	426.667	-0.0917875	0.31827	-0.226506	0.387585	0.369839	0.657703	-0.0827449	0.230384
NA	NA	NA	2	0	2	FALSE	368.333	0.0267581	0.338541	-0.312754	0.432469	-0.055703	0.63918	-0.0953463	0.246036
NA	NA	NA	2	0	2	FALSE	89.5	0.325214	0.709773	-2.0453	1.07016	NA	NA	-0.398979	0.591501
NA	NA	NA	2	0	2	FALSE	188.5	-0.00883231	0.55878	-1.07912	0.639446	NA	NA	-0.472249	0.420764
NA	NA	NA	2	0	2	FALSE	470.333	-0.220842	0.294069	-0.491469	0.386608	0.164402	0.631794	-0.26157	0.219478
NA	NA	NA	2	0	2	FALSE	444.333	-0.255695	0.275123	0.69033	0.457973	0.0709917	0.631996	0.00444447	0.220956
NA	NA	NA	2	0	2	FALSE	168	-0.678264	0.505981	0.435479	0.785708	NA	NA	-0.351779	0.425403
NA	NA	NA	2	0	2	FALSE	208.333	0.0893853	0.480637	-0.269308	0.512513	0.557663	0.90453	0.00462151	0.326894
NA	NA	NA	2	0	2	FALSE	57	0.312529	0.949326	-0.817923	1.1992	NA	NA	-0.122979	0.744328
NA	NA	NA	2	0	2	FALSE	280	-0.51098	0.419587	0.0133882	0.568959	NA	NA	-0.326261	0.33769
NA	NA	NA	2	0	2	FALSE	472	-0.353643	0.29007	-0.338418	0.382488	0.211034	0.676551	-0.289652	0.218713
NA	NA	NA	2	0	2	FALSE	301.333	-0.174315	0.354119	-0.0790565	0.469121	0.15322	0.840386	-0.109969	0.267891
NA	NA	NA	2	0	2	FALSE	59	0.193745	0.968919	-0.586125	1.14073	NA	NA	-0.133095	0.738481
NA	NA	NA	2	0	2	FALSE	492.333	-0.128501	0.325102	-0.908303	0.331148	0.771196	0.702582	-0.385143	0.220291
NA	NA	NA	2	0	2	FALSE	307.667	0.0825313	0.372634	-0.356511	0.477529	0.695272	0.64946	0.0486687	0.267665
NA	NA	NA	2	0	2	FALSE	101	-1.62961	0.70226	-0.91586	0.966292	NA	NA	-1.38292	0.568082
NA	NA	NA	2	0	2	FALSE	206	-0.718172	0.442769	0.192648	0.755618	NA	NA	-0.485368	0.382015
NA	NA	NA	2	0	2	FALSE	238.333	-0.072317	0.416906	-1.09292	0.505839	0.368262	0.933121	-0.39449	0.304149
NA	NA	NA	2	0	2	FALSE	108	-0.552026	0.656409	-0.705802	0.929344	NA	NA	-0.603208	0.536156
NA	NA	NA	1	0	1	FALSE	46460.3	-0.124746	0.112741	-0.0921769	0.0722902	0.20122	0.314128	-0.0907101	0.0597438
NA	NA	NA	2	0	2	FALSE	167	-0.859482	0.508141	-0.133053	0.794669	NA	NA	-0.648661	0.428102
NA	NA	NA	2	0	2	FALSE	92	-0.409606	0.756643	0.325126	0.93275	NA	NA	-0.118007	0.587616
NA	NA	NA	2	0	2	FALSE	458	-0.345018	0.301297	-0.249186	0.373352	0.675366	0.709075	-0.210372	0.222615
NA	NA	NA	2	0	2	FALSE	148.5	0.189269	0.633574	-0.667693	0.707626	NA	NA	-0.192041	0.472021
NA	NA	NA	2	0	2	FALSE	87	-0.114795	0.657553	0.125447	1.17582	NA	NA	-0.0575616	0.573908
NA	NA	NA	2	0	2	FALSE	321.667	0.0566721	0.344653	-0.155921	0.458959	0.395421	0.773225	0.0268392	0.259601
NA	NA	NA	2	0	2	FALSE	127	-0.429408	0.540762	-0.728021	0.742246	-0.929406	1.08622	-0.588194	0.405475
NA	NA	NA	2	0	2	FALSE	183	-0.149289	0.576093	-0.563053	0.636044	NA	NA	-0.335757	0.426985
NA	NA	NA	2	0	2	FALSE	69	0.438656	0.876621	-1.83396	1.11156	NA	NA	-0.432798	0.688324
NA	NA	NA	2	0	2	FALSE	250.333	0.469175	0.43282	-0.825256	0.475574	-0.0635943	0.845277	-0.110522	0.299354
NA	NA	NA	2	0	2	FALSE	346.333	-0.384399	0.332531	0.305016	0.480841	-0.355204	0.630544	-0.19205	0.250913
NA	NA	NA	2	0	2	FALSE	188	-0.23954	0.498461	0.401	0.699996	NA	NA	-0.0240222	0.406035
NA	NA	NA	2	0	2	FALSE	65.5	0.312529	0.89957	-1.19483	1.11493	NA	NA	-0.281825	0.700105
NA	NA	NA	2	0	2	FALSE	360	0.41085	0.348351	-0.502266	0.432611	0.409747	0.632695	0.107298	0.249361
NA	NA	NA	2	0	2	FALSE	465.667	0.0478653	0.293401	-0.155313	0.386676	-0.191695	0.64385	-0.0456221	0.219704
NA	NA	NA	2	0	2	FALSE	339.667	-0.249426	0.348419	-0.502489	0.421583	0.794111	0.855803	-0.249362	0.256247
NA	NA	NA	2	0	2	FALSE	169.333	-0.725809	0.463593	-0.154536	0.643115	0.0936605	1.00095	-0.453262	0.352042
NA	NA	NA	2	0	2	FALSE	71.5	-0.377805	0.821232	-2.41216	1.19229	NA	NA	-1.0324	0.676324
NA	NA	NA	2	0	2	FALSE	57	-0.114214	0.911408	NA	NA	NA	NA	-0.114214	0.911408
NA	NA	NA	2	0	2	FALSE	118	-1.11459	0.706853	-1.51669	0.826241	NA	NA	-1.28451	0.537117
NA	NA	NA	2	0	2	FALSE	75	NA	NA	-1.65999	1.11745	NA	NA	-1.65999	1.11745
NA	NA	NA	2	0	2	FALSE	85	-0.579069	0.777386	-0.310084	0.988393	NA	NA	-0.476267	0.611035
NA	NA	NA	2	0	2	FALSE	57.5	0.207168	0.916124	-0.676501	1.22616	NA	NA	-0.109403	0.733903
NA	NA	NA	2	0	2	FALSE	63	NA	NA	-1.63207	1.21755	NA	NA	-1.63207	1.21755
NA	NA	NA	2	0	2	FALSE	64	NA	NA	-0.924423	1.18287	NA	NA	-0.924423	1.18287
NA	NA	NA	1	0	1	FALSE	6938	-0.450065	0.130798	-0.386679	0.116676	-0.0765168	0.339728	-0.393918	0.0843429
NA	NA	NA	2	0	2	FALSE	54	-0.138399	0.936325	NA	NA	NA	NA	-0.138399	0.936325
NA	NA	NA	2	0	2	FALSE	92	NA	NA	-1.23922	0.994765	NA	NA	-1.23922	0.994765
NA	NA	NA	2	0	2	FALSE	56.5	0.198585	0.950301	-0.71004	1.20662	NA	NA	-0.149253	0.746566
NA	NA	NA	2	0	2	FALSE	61	-1.7189	0.925576	NA	NA	NA	NA	-1.7189	0.925576
NA	NA	NA	2	0	2	FALSE	87	NA	NA	-1.02441	1.01726	NA	NA	-1.02441	1.01726
NA	NA	NA	2	0	2	FALSE	81	NA	NA	-0.265699	1.04113	NA	NA	-0.265699	1.04113
NA	NA	NA	2	0	2	FALSE	118	-0.176318	0.633633	-0.00666983	0.868453	NA	NA	-0.117382	0.511872
NA	NA	NA	2	0	2	FALSE	85.5	-0.193334	0.842598	-1.38741	0.940044	NA	NA	-0.725292	0.627439
NA	NA	NA	2	0	2	FALSE	82	0.686612	0.756861	-0.0986965	0.91771	-0.680216	1.00592	0.104349	0.50499
NA	NA	NA	2	0	2	FALSE	68	NA	NA	-1.39334	1.16191	NA	NA	-1.39334	1.16191
NA	NA	NA	2	0	2	FALSE	178	-0.691869	0.546656	-0.379533	0.682289	NA	NA	-0.569757	0.426615
NA	NA	NA	2	0	2	FALSE	112.333	0.876059	0.679655	-2.50611	0.792771	-0.650893	0.944393	-0.578372	0.45281
NA	NA	NA	2	0	2	FALSE	185.333	0.320577	0.49544	-0.394377	0.562235	0.869226	0.893498	0.135124	0.343198
NA	NA	NA	2	0	2	FALSE	171	-0.61581	0.544205	-0.466832	0.593893	0.309903	0.820391	-0.382255	0.360432
NA	NA	NA	2	0	2	FALSE	290.667	0.0335369	0.376126	-0.263296	0.45682	0.230214	0.852729	-0.0534944	0.274869
NA	NA	NA	2	0	2	FALSE	185	-1.25145	0.450407	-0.537995	0.600402	-0.315049	1.09009	-0.927609	0.342094
NA	NA	NA	2	0	2	FALSE	94	0.468533	0.781663	-0.150354	0.88888	NA	NA	0.198647	0.586986
NA	NA	NA	2	0	2	FALSE	309	-0.470877	0.365907	-0.683079	0.464785	0.417792	0.732497	-0.422605	0.267627
NA	NA	NA	2	0	2	FALSE	231.333	-0.65842	0.37204	0.655837	0.594355	0.380954	0.927216	-0.219033	0.298558
NA	NA	NA	2	0	2	FALSE	98.5	0.0674064	0.82785	-1.39213	0.847894	NA	NA	-0.644908	0.592338
NA	NA	NA	2	0	2	FALSE	149	0.256864	0.517379	-0.413439	0.748003	-0.328217	0.775592	-0.0452257	0.373055
NA	NA	NA	2	0	2	FALSE	130.667	-0.106525	0.546068	-0.5896	0.745169	-0.244657	0.941613	-0.269803	0.398969
NA	NA	NA	2	0	2	FALSE	213	-0.0867299	0.439775	-0.153906	0.535047	0.352055	0.915938	-0.0574712	0.318534
NA	NA	NA	2	0	2	FALSE	119.5	-0.233388	0.644657	-0.476408	0.847839	NA	NA	-0.322416	0.513164
NA	NA	NA	2	0	2	FALSE	302.333	-0.212415	0.348248	0.355621	0.479456	-0.0518246	0.814151	-0.0200412	0.26627
NA	NA	NA	2	0	2	FALSE	221.667	0.188805	0.416456	-0.678394	0.580043	-0.702828	0.765941	-0.203563	0.309454
NA	NA	NA	2	0	2	FALSE	111.5	0.189733	0.725884	-1.33293	0.830337	NA	NA	-0.469856	0.546499
NA	NA	NA	2	0	2	FALSE	154.333	0.37938	0.545045	-0.996151	0.64843	0.339713	0.852423	-0.0877173	0.374747
NA	NA	NA	2	0	2	FALSE	60	0.312529	0.931817	0.4648	1.14635	NA	NA	0.373111	0.723071
NA	NA	NA	1	0	1	FALSE	25762.3	-0.0331361	0.115523	-0.155971	0.0802436	0.127857	0.317008	-0.105891	0.0645249
NA	NA	NA	2	0	2	FALSE	127.5	-1.26346	0.589358	-1.45085	0.924498	NA	NA	-1.31761	0.496965
NA	NA	NA	2	0	2	FALSE	58	-0.693913	0.912749	NA	NA	NA	NA	-0.693913	0.912749
NA	NA	NA	2	0	2	FALSE	245.333	0.270204	0.388479	0.473483	0.565146	-0.66442	0.722224	0.171239	0.292674
NA	NA	NA	2	0	2	FALSE	128.5	-0.439258	0.569307	0.0312197	0.908007	NA	NA	-0.306498	0.48234
NA	NA	NA	2	0	2	FALSE	75	NA	NA	-0.814098	1.09055	NA	NA	-0.814098	1.09055
NA	NA	NA	3	0	3	FALSE	56	-3.93597	1.34946	NA	NA	NA	NA	-3.93597	1.34946
NA	NA	NA	2	0	2	FALSE	213.667	0.127386	0.41874	-0.359527	0.537969	0.736944	1.08558	0.0109485	0.316118
NA	NA	NA	2	0	2	FALSE	64	NA	NA	-1.33235	1.19526	NA	NA	-1.33235	1.19526
NA	NA	NA	2	0	2	FALSE	148	0.507493	0.603209	-0.355464	0.731548	NA	NA	0.158229	0.465399
NA	NA	NA	2	0	2	FALSE	231	-0.158597	0.396863	0.335982	0.539943	1.57523	0.925292	0.181356	0.302236
NA	NA	NA	2	0	2	FALSE	206	-0.586187	0.424321	-0.0156112	0.579733	0.876778	0.90929	-0.230183	0.320438
NA	NA	NA	2	0	2	FALSE	186	-0.945511	0.472842	-0.813276	0.78818	NA	NA	-0.910515	0.405473
NA	NA	NA	2	0	2	FALSE	61	-1.2489	0.905141	NA	NA	NA	NA	-1.2489	0.905141
NA	NA	NA	2	0	2	FALSE	218	0.294018	0.46254	-0.387566	0.517004	0.603406	0.827343	0.0815943	0.318202
NA	NA	NA	2	0	2	FALSE	226	0.3939	0.44943	-0.238376	0.502903	0.953979	0.859976	0.223998	0.312242
NA	NA	NA	2	0	2	FALSE	154.667	0.112642	0.533853	-0.694692	0.611746	0.551583	1.0397	-0.133804	0.375135
NA	NA	NA	2	0	2	FALSE	107.667	0.189469	0.562903	-0.444726	0.899991	0.424326	0.985092	0.0896817	0.429495
NA	NA	NA	2	0	2	FALSE	465.667	-0.0412349	0.301938	-0.44943	0.39849	-0.0768803	0.566261	-0.17279	0.221485
NA	NA	NA	2	0	2	FALSE	302.333	-0.0806136	0.370979	-0.0652491	0.470211	0.197334	0.705697	-0.0351247	0.26922
NA	NA	NA	2	0	2	FALSE	53	-1.57832	0.98445	NA	NA	NA	NA	-1.57832	0.98445
NA	NA	NA	2	0	2	FALSE	96	-0.15083	0.706071	NA	NA	NA	NA	-0.15083	0.706071
NA	NA	NA	2	0	2	FALSE	56	NA	NA	-2.38382	1.34849	NA	NA	-2.38382	1.34849
NA	NA	NA	2	0	2	FALSE	52	-0.62318	0.961765	NA	NA	NA	NA	-0.62318	0.961765
NA	NA	NA	2	0	2	FALSE	88	0.3607	0.782309	-0.746481	0.948519	NA	NA	-0.0875402	0.603521
NA	NA	NA	2	0	2	FALSE	89	0.121751	0.789052	-2.98708	1.06283	NA	NA	-0.982892	0.633544
NA	NA	NA	2	0	2	FALSE	90.5	0.20611	0.673203	-0.412943	1.07661	NA	NA	0.0320982	0.570798
NA	NA	NA	2	0	2	FALSE	101	-0.748696	0.625235	0.0745066	1.07127	NA	NA	-0.539533	0.539993
NA	NA	NA	2	0	2	FALSE	57	NA	NA	-1.47977	1.27251	NA	NA	-1.47977	1.27251
NA	NA	NA	2	0	2	FALSE	89	-0.122585	0.7324	NA	NA	NA	NA	-0.122585	0.7324
NA	NA	NA	2	0	2	FALSE	56	-1.37102	0.948781	NA	NA	NA	NA	-1.37102	0.948781
NA	NA	NA	2	0	2	FALSE	76	NA	NA	0.0582793	1.07141	NA	NA	0.0582793	1.07141
NA	NA	NA	2	0	2	FALSE	102	NA	NA	-1.59237	0.956124	NA	NA	-1.59237	0.956124
NA	NA	NA	1	0	1	FALSE	7029.33	-0.0893967	0.131074	-0.182525	0.115186	0.201611	0.337513	-0.120759	0.0838135
NA	NA	NA	2	0	2	FALSE	50	-0.21172	0.973545	NA	NA	NA	NA	-0.21172	0.973545
NA	NA	NA	2	0	2	FALSE	82	0.189085	0.871481	-1.69141	0.960001	NA	NA	-0.660484	0.645261
NA	NA	NA	2	0	2	FALSE	50	-0.526801	0.97866	NA	NA	NA	NA	-0.526801	0.97866
NA	NA	NA	2	0	2	FALSE	67.5	-0.220037	0.875695	0.363384	1.0908	NA	NA	0.00860961	0.68287
NA	NA	NA	2	0	2	FALSE	56	NA	NA	0.0400027	1.2478	NA	NA	0.0400027	1.2478
NA	NA	NA	2	0	2	FALSE	68	0.132557	0.833242	NA	NA	NA	NA	0.132557	0.833242
NA	NA	NA	2	0	2	FALSE	90	0.567421	0.868845	-0.48762	0.865655	NA	NA	0.0379601	0.613235
NA	NA	NA	2	0	2	FALSE	97	-0.293042	0.63989	-0.201596	1.07398	NA	NA	-0.269084	0.549714
NA	NA	NA	2	0	2	FALSE	52	NA	NA	-0.465553	1.30178	NA	NA	-0.465553	1.30178
NA	NA	NA	2	0	2	FALSE	72.5	-1.18358	0.815704	0.0992649	1.11588	NA	NA	-0.736814	0.65852
NA	NA	NA	2	0	2	FALSE	62	NA	NA	-1.51528	1.2218	NA	NA	-1.51528	1.2218
NA	NA	NA	2	0	2	FALSE	190.333	-0.379671	0.484644	-0.226879	0.568191	-0.0599448	0.853734	-0.275175	0.338507
NA	NA	NA	2	0	2	FALSE	186.333	-0.863399	0.419374	0.234481	0.669731	-0.248934	0.929728	-0.515244	0.332004
NA	NA	NA	2	0	2	FALSE	82.5	-2.07967	0.726554	0.404554	1.20255	NA	NA	-1.41535	0.621866
NA	NA	NA	2	0	2	FALSE	299.667	-0.514984	0.370582	0.0497209	0.481095	-0.331007	0.697067	-0.308658	0.270565
NA	NA	NA	2	0	2	FALSE	315	-0.0383907	0.359955	0.929521	0.475767	-0.356807	0.658041	0.206725	0.26311
NA	NA	NA	2	0	2	FALSE	58	0.409553	0.939706	-0.0784954	1.17783	NA	NA	0.219727	0.734566
NA	NA	NA	2	0	2	FALSE	342.333	0.525861	0.364576	-0.678104	0.417476	0.301103	0.723195	0.0422665	0.25672
NA	NA	NA	3	0	3	FALSE	57	NA	NA	-3.79633	1.62892	NA	NA	-3.79633	1.62892
NA	NA	NA	2	0	2	FALSE	219.333	0.0298096	0.430657	-0.875091	0.527278	0.376599	0.964518	-0.256569	0.315227
NA	NA	NA	2	0	2	FALSE	57	-0.135954	0.911667	NA	NA	NA	NA	-0.135954	0.911667
NA	NA	NA	2	0	2	FALSE	107.5	-1.33395	0.680235	-0.615288	0.919138	NA	NA	-1.07962	0.546781
NA	NA	NA	2	0	2	FALSE	440.333	-0.31436	0.304525	0.13023	0.406123	0.261215	0.604747	-0.0963209	0.225988
NA	NA	NA	2	0	2	FALSE	359	-0.194149	0.358577	-1.11709	0.440773	0.212318	0.602628	-0.425763	0.252553
NA	NA	NA	2	0	2	FALSE	153	0.627118	0.690553	-0.791203	0.657996	NA	NA	-0.116264	0.476367
NA	NA	NA	2	0	2	FALSE	218	0.120708	0.472129	-0.19313	0.558021	-0.543375	0.679057	-0.127413	0.318364
NA	NA	NA	2	0	2	FALSE	142	-0.299628	0.484044	0.328939	0.736069	-0.194962	1.05154	-0.120833	0.377476
NA	NA	NA	2	0	2	FALSE	329.333	0.244229	0.352594	-0.632866	0.454362	0.180417	0.695478	-0.0486837	0.258587
NA	NA	NA	2	0	2	FALSE	209	0.330981	0.44621	0.114817	0.533803	0.608177	0.926646	0.286037	0.321138
NA	NA	NA	2	0	2	FALSE	405.667	0.225287	0.331147	-0.426094	0.398714	-0.200054	0.635423	-0.0626912	0.23645
NA	NA	NA	2	0	2	FALSE	239	0.140533	0.383667	0.225386	0.583079	-0.0857443	0.751802	0.127428	0.294832
NA	NA	NA	2	0	2	FALSE	125.5	-0.0304159	0.622496	0.332719	0.82813	NA	NA	0.100689	0.497593
NA	NA	NA	2	0	2	FALSE	168	0.026647	0.571121	0.417902	0.681207	NA	NA	0.188145	0.437656
NA	NA	NA	2	0	2	FALSE	238.333	-0.306324	0.406571	-0.188271	0.518155	0.379373	0.884507	-0.18724	0.300795
NA	NA	NA	1	0	1	FALSE	38067.3	-0.105648	0.113476	-0.0397113	0.0747383	0.120309	0.314759	-0.052851	0.0612245
NA	NA	NA	2	0	2	FALSE	137	-0.0818096	0.581392	-0.140513	0.818492	NA	NA	-0.101496	0.473985
NA	NA	NA	2	0	2	FALSE	135	-0.15645	0.641296	-1.19851	0.771495	NA	NA	-0.582257	0.493165
NA	NA	NA	2	0	2	FALSE	465.667	-0.31608	0.292836	-0.307415	0.382352	0.515383	0.683266	-0.226935	0.220093
NA	NA	NA	2	0	2	FALSE	104	-0.0283977	0.694489	-0.522907	0.900955	NA	NA	-0.212712	0.550041
NA	NA	NA	2	0	2	FALSE	77	NA	NA	-1.59892	1.10017	NA	NA	-1.59892	1.10017
NA	NA	NA	2	0	2	FALSE	223.667	0.151962	0.427897	-0.135119	0.521794	0.311969	0.905167	0.0689957	0.31076
NA	NA	NA	2	0	2	FALSE	101.5	-0.548412	0.629888	-0.285484	1.04783	NA	NA	-0.478619	0.539854
NA	NA	NA	2	0	2	FALSE	175.667	-0.233192	0.452358	-0.0761972	0.624053	-0.436311	1.01945	-0.208517	0.344686
NA	NA	NA	2	0	2	FALSE	88	-2.61421	0.742098	-1.09249	1.18739	NA	NA	-2.18678	0.629303
NA	NA	NA	2	0	2	FALSE	232.333	-0.304677	0.394264	-0.392217	0.551658	0.626948	0.888885	-0.223524	0.30172
NA	NA	NA	2	0	2	FALSE	292	0.0105201	0.362691	-0.458762	0.533524	-0.440839	0.640429	-0.192319	0.271631
NA	NA	NA	2	0	2	FALSE	123	-0.0847226	0.701914	-0.281675	0.768899	NA	NA	-0.174247	0.518395
NA	NA	NA	2	0	2	FALSE	91	NA	NA	-2.23985	1.04734	NA	NA	-2.23985	1.04734
NA	NA	NA	2	0	2	FALSE	334.333	0.0222618	0.343358	-0.469595	0.446806	0.510381	0.752965	-0.0828063	0.256031
NA	NA	NA	2	0	2	FALSE	404.333	-0.377663	0.333749	0.236811	0.382355	0.159294	0.714444	-0.0820506	0.237177
NA	NA	NA	2	0	2	FALSE	129	0.229399	0.528813	0.559861	0.756432	0.340956	0.985345	0.338382	0.396725
NA	NA	NA	2	0	2	FALSE	170.5	-0.858868	0.574416	-0.238263	0.68118	NA	NA	-0.600957	0.439126
NA	NA	NA	2	0	2	FALSE	86	-0.853417	0.75508	NA	NA	NA	NA	-0.853417	0.75508
NA	NA	NA	2	0	2	FALSE	638	-0.176547	0.271324	-0.0390199	0.33979	-0.61772	0.491516	-0.200614	0.194683
NA	NA	NA	2	0	2	FALSE	425.333	-0.315288	0.29383	0.00114306	0.415294	0.207189	0.718813	-0.167955	0.22753
NA	NA	NA	2	0	2	FALSE	61	NA	NA	-2.14947	1.27079	NA	NA	-2.14947	1.27079
NA	NA	NA	2	0	2	FALSE	260.333	-0.256518	0.425553	-1.00943	0.477375	0.254532	0.785959	-0.471334	0.294514
NA	NA	NA	2	0	2	FALSE	235.667	-0.348199	0.438159	-0.733916	0.494673	0.380893	0.889466	-0.410202	0.307738
NA	NA	NA	2	0	2	FALSE	168	-1.00343	0.446788	0.717362	0.693131	0.163393	0.965228	-0.411321	0.349977
NA	NA	NA	2	0	2	FALSE	51	-1.16829	0.985802	NA	NA	NA	NA	-1.16829	0.985802
NA	NA	NA	2	0	2	FALSE	415.667	0.113696	0.340279	-0.350775	0.398347	-0.150771	0.573188	-0.0938475	0.23582
NA	NA	NA	2	0	2	FALSE	339	-0.0238426	0.359486	-0.392064	0.452843	-0.724035	0.628191	-0.259503	0.256929
NA	NA	NA	2	0	2	FALSE	84	NA	NA	-3.4891	1.26355	NA	NA	-3.4891	1.26355
NA	NA	NA	2	0	2	FALSE	371.667	-0.147151	0.339871	-0.714837	0.430082	0.0769641	0.637453	-0.299504	0.246002
NA	NA	NA	2	0	2	FALSE	310.667	-0.447356	0.344066	-0.33231	0.505565	-0.90446	0.698208	-0.481188	0.263423
NA	NA	NA	2	0	2	FALSE	58	-0.472426	0.916464	-0.721223	1.22709	NA	NA	-0.561513	0.734276
NA	NA	NA	2	0	2	FALSE	134.5	0.0923749	0.538538	0.889114	0.921116	NA	NA	0.295341	0.46491
NA	NA	NA	2	0	2	FALSE	499	-0.0997506	0.301908	0.305906	0.360944	0.0844737	0.582607	0.069585	0.215201
NA	NA	NA	2	0	2	FALSE	375.333	-0.32998	0.328607	-0.256908	0.463227	-0.00567592	0.583734	-0.253313	0.243571
NA	NA	NA	2	0	2	FALSE	159	-1.15149	0.473848	1.28275	0.990225	NA	NA	-0.697942	0.42743
NA	NA	NA	2	0	2	FALSE	204	0.0203924	0.429205	0.498914	0.675582	-1.01655	0.680191	-0.101562	0.319752
NA	NA	NA	2	0	2	FALSE	260	-0.107666	0.365749	0.07527	0.566618	-0.674664	0.736535	-0.145901	0.283598
NA	NA	NA	2	0	2	FALSE	370.667	-0.0726516	0.327833	-1.02136	0.421831	0.465552	0.770092	-0.338992	0.245362
NA	NA	NA	2	0	2	FALSE	329.333	-0.866704	0.323278	-0.916223	0.491146	-0.515976	0.827584	-0.846485	0.256713
NA	NA	NA	2	0	2	FALSE	114	-0.441706	0.669653	-1.85491	0.892085	NA	NA	-0.951034	0.535553
NA	NA	NA	2	0	2	FALSE	426.333	-0.00148041	0.339988	-0.738566	0.379302	0.172817	0.609428	-0.255875	0.233799
NA	NA	NA	2	0	2	FALSE	328.333	-0.0389647	0.34323	0.0490113	0.47562	-0.354143	0.671219	-0.0594993	0.257099
NA	NA	NA	2	0	2	FALSE	131	0.0135006	0.608108	-0.251598	0.816342	NA	NA	-0.0811059	0.487673
NA	NA	NA	2	0	2	FALSE	248	-0.192992	0.369226	0.320704	0.571866	-0.167763	0.800544	-0.0582896	0.289237
NA	NA	NA	2	0	2	FALSE	66	-0.275258	0.814289	-0.443004	1.21174	NA	NA	-0.327443	0.675861
NA	NA	NA	1	0	1	FALSE	47705	-0.100351	0.112693	-0.129846	0.0724584	0.0239558	0.313226	-0.115923	0.0598253
NA	NA	NA	2	0	2	FALSE	138	-0.157475	0.579999	-0.374109	0.817502	NA	NA	-0.230009	0.473038
NA	NA	NA	2	0	2	FALSE	113.667	0.325528	0.666349	-1.6088	0.760092	-0.222202	0.923825	-0.448494	0.44045
NA	NA	NA	2	0	2	FALSE	435.333	-0.357111	0.30113	-0.50037	0.405452	0.287656	0.657855	-0.32527	0.226912
NA	NA	NA	2	0	2	FALSE	167	-0.230172	0.536044	-0.153679	0.73214	NA	NA	-0.203477	0.43251
NA	NA	NA	2	0	2	FALSE	71	NA	NA	-1.75234	1.15301	NA	NA	-1.75234	1.15301
NA	NA	NA	2	0	2	FALSE	364	0.00254976	0.319298	0.253884	0.44916	-0.0124601	0.702071	0.0749173	0.244018
NA	NA	NA	2	0	2	FALSE	94.3333	0.484698	0.691205	-0.0528634	0.861449	-0.823411	0.964991	0.0130772	0.470647
NA	NA	NA	2	0	2	FALSE	164.667	-0.0707624	0.470088	-0.347419	0.650549	-0.447303	0.989219	-0.202051	0.355558
NA	NA	NA	2	0	2	FALSE	97.6667	-0.348083	0.618013	-0.897203	0.882883	0.0488117	1.0781	-0.424318	0.458278
NA	NA	NA	2	0	2	FALSE	225.667	0.580354	0.409957	0.234404	0.561922	-0.241525	0.787643	0.354758	0.305295
NA	NA	NA	2	0	2	FALSE	322	-0.00905476	0.364908	-0.469236	0.470011	-0.675499	0.637288	-0.265907	0.262623
NA	NA	NA	2	0	2	FALSE	198.5	-1.04559	0.572007	-1.3397	0.615819	NA	NA	-1.18181	0.419104
NA	NA	NA	3	0	3	FALSE	63	-2.349	0.956379	NA	NA	NA	NA	-2.349	0.956379
NA	NA	NA	2	0	2	FALSE	66	-2.6832	0.9856	-1.7089	1.17584	NA	NA	-2.28115	0.755343
NA	NA	NA	2	0	2	FALSE	410.333	-0.502292	0.297319	0.0746051	0.42568	0.39531	0.732542	-0.242517	0.231282
NA	NA	NA	2	0	2	FALSE	452.333	0.11998	0.319479	-0.903018	0.363813	0.330762	0.67991	-0.252688	0.226363
NA	NA	NA	2	0	2	FALSE	227	0.252652	0.458011	-0.789554	0.512619	-0.253934	0.787698	-0.216954	0.313355
NA	NA	NA	2	0	2	FALSE	209	-0.334562	0.401906	-0.069533	0.630967	-0.638496	0.832256	-0.312199	0.313938
NA	NA	NA	3	0	3	FALSE	52	NA	NA	-3.29604	1.55392	NA	NA	-3.29604	1.55392
NA	NA	NA	2	0	2	FALSE	642.667	0.0934468	0.256797	1.07034	0.351394	-0.125178	0.501719	0.352042	0.191616
NA	NA	NA	2	0	2	FALSE	572.333	0.0429289	0.272058	-0.101158	0.362834	-0.326446	0.535367	-0.0539672	0.201637
NA	NA	NA	2	0	2	FALSE	86	0.217219	0.733712	-1.14769	1.03832	NA	NA	-0.237348	0.599206
NA	NA	NA	2	0	2	FALSE	283.667	0.604798	0.433988	-1.63983	0.480195	-0.244319	0.632843	-0.371442	0.286969
NA	NA	NA	2	0	2	FALSE	162.5	-0.581975	0.469831	0.458105	0.941448	NA	NA	-0.37459	0.420389
NA	NA	NA	2	0	2	FALSE	118.5	-1.35673	0.576599	0.0829125	1.0314	NA	NA	-1.01393	0.503291
NA	NA	NA	2	0	2	FALSE	75	-2.86088	0.872956	-1.25779	1.19261	NA	NA	-2.30162	0.704414
NA	NA	NA	2	0	2	FALSE	62	NA	NA	0.651772	1.18155	NA	NA	0.651772	1.18155
NA	NA	NA	2	0	2	FALSE	83	0.0711477	0.756113	NA	NA	NA	NA	0.0711477	0.756113
NA	NA	NA	2	0	2	FALSE	147	-0.234015	0.650132	-0.700727	0.704099	NA	NA	-0.448802	0.477653
NA	NA	NA	2	0	2	FALSE	89.5	-0.0647654	0.785649	-1.50221	0.952899	NA	NA	-0.646473	0.606183
NA	NA	NA	2	0	2	FALSE	50.5	-1.25769	0.998782	-0.804857	1.32158	NA	NA	-1.09307	0.796823
NA	NA	NA	2	0	2	FALSE	65	-0.00970559	0.943486	-0.966498	1.07967	NA	NA	-0.423988	0.710445
NA	NA	NA	2	0	2	FALSE	66	-0.0192485	0.834623	0.0229019	1.16758	NA	NA	-0.00499407	0.678985
NA	NA	NA	2	0	2	FALSE	140.5	-0.687727	0.575764	-0.695401	0.821297	NA	NA	-0.690256	0.471453
NA	NA	NA	2	0	2	FALSE	52	NA	NA	-0.796051	1.30863	NA	NA	-0.796051	1.30863
NA	NA	NA	2	0	2	FALSE	59	-0.655948	0.904331	NA	NA	NA	NA	-0.655948	0.904331
NA	NA	NA	1	0	1	FALSE	7445.67	-0.110768	0.127642	-0.0386231	0.11279	0.648192	0.353469	-0.0313994	0.0822028
NA	NA	NA	2	0	2	FALSE	62	NA	NA	-0.18231	1.18847	NA	NA	-0.18231	1.18847
NA	NA	NA	2	0	2	FALSE	52	NA	NA	-1.98887	1.36293	NA	NA	-1.98887	1.36293
NA	NA	NA	2	0	2	FALSE	90	NA	NA	-1.43549	1.01183	NA	NA	-1.43549	1.01183
NA	NA	NA	2	0	2	FALSE	60	0.207168	0.88551	NA	NA	NA	NA	0.207168	0.88551
NA	NA	NA	2	0	2	FALSE	98.5	-1.01796	0.658305	-0.644477	1.04005	NA	NA	-0.911131	0.556244
NA	NA	NA	2	0	2	FALSE	91	NA	NA	-1.15718	0.997974	NA	NA	-1.15718	0.997974
NA	NA	NA	2	0	2	FALSE	74	0.356014	0.808534	0.446937	1.06861	NA	NA	0.389115	0.644773
NA	NA	NA	2	0	2	FALSE	96	-0.284408	0.690103	1.3948	0.97358	NA	NA	0.277147	0.563009
NA	NA	NA	2	0	2	FALSE	117	-0.259384	0.729789	-0.933058	0.790058	NA	NA	-0.569549	0.536081
NA	NA	NA	2	0	2	FALSE	123	-0.439085	0.550375	0.977558	1.01431	NA	NA	-0.116862	0.483749
NA	NA	NA	2	0	2	FALSE	86.5	-1.25506	0.658077	-0.291752	1.25183	NA	NA	-1.04649	0.582495
NA	NA	NA	2	0	2	FALSE	138	-0.806703	0.581134	0.25554	0.822127	NA	NA	-0.452782	0.474548
NA	NA	NA	2	0	2	FALSE	122.5	0.055987	0.592608	-0.337003	0.902911	NA	NA	-0.062333	0.495431
NA	NA	NA	2	0	2	FALSE	79	-0.669145	0.783678	NA	NA	NA	NA	-0.669145	0.783678
NA	NA	NA	2	0	2	FALSE	57	-0.569276	0.918166	NA	NA	NA	NA	-0.569276	0.918166
NA	NA	NA	2	0	2	FALSE	53	-0.204606	0.945853	NA	NA	NA	NA	-0.204606	0.945853
NA	NA	NA	2	0	2	FALSE	58	NA	NA	-0.236901	1.22937	NA	NA	-0.236901	1.22937
NA	NA	NA	2	0	2	FALSE	62	-0.496516	0.950368	-1.08181	1.12721	NA	NA	-0.739703	0.726585
NA	NA	NA	2	0	2	FALSE	53	-0.860482	0.958147	NA	NA	NA	NA	-0.860482	0.958147
NA	NA	NA	2	0	2	FALSE	67	0.283541	0.782815	-0.341501	1.24155	NA	NA	0.105741	0.66218
NA	NA	NA	1	0	1	FALSE	4021	0.0945505	0.142266	-0.0983844	0.139655	0.975593	0.39344	0.0553442	0.09661
NA	NA	NA	2	0	2	FALSE	64	NA	NA	-0.849865	1.18109	NA	NA	-0.849865	1.18109
NA	NA	NA	2	0	2	FALSE	52	-0.841434	0.966713	NA	NA	NA	NA	-0.841434	0.966713
NA	NA	NA	2	0	2	FALSE	57	NA	NA	-0.860851	1.2516	NA	NA	-0.860851	1.2516
NA	NA	NA	2	0	2	FALSE	61	0.179536	0.941585	0.492838	1.12106	NA	NA	0.309131	0.721009
NA	NA	NA	2	0	2	FALSE	160	-0.901474	0.547866	0.290796	0.755118	NA	NA	-0.490301	0.443445
NA	NA	NA	2	0	2	FALSE	58.5	-0.818873	0.8859	-2.14119	1.33744	NA	NA	-1.22212	0.73857
NA	NA	NA	2	0	2	FALSE	63	0.433481	0.914372	0.157244	1.11539	NA	NA	0.322454	0.707131
NA	NA	NA	2	0	2	FALSE	151.333	-0.297536	0.512658	-0.669879	0.750785	-0.0286243	0.771401	-0.326278	0.371148
NA	NA	NA	2	0	2	FALSE	66	-0.405936	0.864633	-0.639557	1.14168	NA	NA	-0.49109	0.689272
NA	NA	NA	2	0	2	FALSE	66.3333	-0.363621	0.82678	-1.62859	1.10867	-1.37975	1.07463	-0.971125	0.564116
NA	NA	NA	2	0	2	FALSE	63	NA	NA	-3.4891	1.45858	NA	NA	-3.4891	1.45858
NA	NA	NA	2	0	2	FALSE	108.667	-0.289832	0.587012	0.367951	0.873639	-1.49492	0.943571	-0.38199	0.432927
NA	NA	NA	2	0	2	FALSE	106.667	-0.386349	0.589927	-1.55505	0.849447	-1.54139	1.09749	-0.893001	0.443261
NA	NA	NA	2	0	2	FALSE	94.3333	1.37762	0.717186	0.0860013	0.891028	-0.634513	0.87488	0.434055	0.47087
NA	NA	NA	2	0	2	FALSE	126	0.396299	0.678438	-0.488776	0.770883	NA	NA	0.00998698	0.509292
NA	NA	NA	2	0	2	FALSE	71	NA	NA	-2.62259	1.22301	NA	NA	-2.62259	1.22301
NA	NA	NA	2	0	2	FALSE	67	-0.765403	0.851599	NA	NA	NA	NA	-0.765403	0.851599
NA	NA	NA	2	0	2	FALSE	130	-0.0376736	0.525917	-0.464548	0.743842	-0.283769	1.0521	-0.19477	0.397583
NA	NA	NA	2	0	2	FALSE	104	-0.559959	0.847773	-1.3917	0.808066	NA	NA	-0.995761	0.584923
NA	NA	NA	2	0	2	FALSE	149	0.0814171	0.616924	-0.0701831	0.714467	NA	NA	0.0166645	0.46694
NA	NA	NA	2	0	2	FALSE	159.5	-0.157887	0.502772	-0.110842	0.837557	NA	NA	-0.145426	0.43107
NA	NA	NA	2	0	2	FALSE	96.6667	-0.491757	0.601484	0.212063	0.911047	-0.661793	1.09303	-0.344928	0.456155
NA	NA	NA	2	0	2	FALSE	166.667	-0.455842	0.489691	-0.526521	0.666452	-0.48435	0.827392	-0.481313	0.356181
NA	NA	NA	2	0	2	FALSE	94.6667	0.0583751	0.605561	-0.490333	0.954378	-0.556869	1.03682	-0.188673	0.458584
NA	NA	NA	2	0	2	FALSE	96.5	-0.0790333	0.691516	-0.954549	0.982493	NA	NA	-0.369071	0.56549
NA	NA	NA	2	0	2	FALSE	102	-0.270122	0.689956	-0.904829	0.932805	NA	NA	-0.494571	0.554706
NA	NA	NA	1	0	1	FALSE	13860.7	-0.0958409	0.120456	-0.0310293	0.093841	0.213699	0.323408	-0.0421052	0.0721616
NA	NA	NA	2	0	2	FALSE	64	-1.71812	0.903891	NA	NA	NA	NA	-1.71812	0.903891
NA	NA	NA	2	0	2	FALSE	137	-0.0454821	0.479205	0.122554	0.816634	0.325157	0.958095	0.0489562	0.379497
NA	NA	NA	2	0	2	FALSE	51	-2.13769	1.04134	NA	NA	NA	NA	-2.13769	1.04134
NA	NA	NA	2	0	2	FALSE	196.5	-0.796446	0.420031	0.842692	0.921273	NA	NA	-0.51436	0.382183
NA	NA	NA	2	0	2	FALSE	81	0.809931	0.760905	NA	NA	NA	NA	0.809931	0.760905
NA	NA	NA	2	0	2	FALSE	101.5	0.782532	0.751981	-0.271008	0.856148	NA	NA	0.32372	0.56499
NA	NA	NA	2	0	2	FALSE	115.5	0.252209	0.759263	-0.41268	0.770107	NA	NA	-0.0755216	0.540673
NA	NA	NA	2	0	2	FALSE	134.5	-0.958583	0.570537	-0.295038	0.874704	NA	NA	-0.760538	0.477868
NA	NA	NA	2	0	2	FALSE	115	0.108879	0.614392	0.373346	0.918857	NA	NA	0.190588	0.510738
NA	NA	NA	2	0	2	FALSE	52	0.782532	0.955399	0.0840285	1.28209	NA	NA	0.533138	0.766085
NA	NA	NA	2	0	2	FALSE	96	-1.53052	0.733367	NA	NA	NA	NA	-1.53052	0.733367
NA	NA	NA	2	0	2	FALSE	175.667	-0.101966	0.523486	-0.0625309	0.587791	-0.659044	0.824733	-0.189924	0.353251
NA	NA	NA	2	0	2	FALSE	119	-0.275258	0.548939	-1.20029	0.818043	-0.689867	1.0137	-0.583892	0.415727
NA	NA	NA	2	0	2	FALSE	64	NA	NA	-0.849865	1.18109	NA	NA	-0.849865	1.18109
NA	NA	NA	2	0	2	FALSE	134	-0.225602	0.498364	0.56785	1.11262	NA	NA	-0.0930129	0.454822
NA	NA	NA	2	0	2	FALSE	79	0.294648	0.772964	NA	NA	NA	NA	0.294648	0.772964
NA	NA	NA	2	0	2	FALSE	146	0.149204	0.574146	-2.02839	0.643506	0.479455	1.03141	-0.625345	0.395641
NA	NA	NA	2	0	2	FALSE	179.333	-0.346617	0.434269	0.281527	0.669523	-0.0863238	0.896153	-0.150069	0.337511
NA	NA	NA	2	0	2	FALSE	347	-0.595376	0.334342	-0.256403	0.483101	-0.0756336	0.624503	-0.419046	0.25162
NA	NA	NA	2	0	2	FALSE	201	-0.0596997	0.375551	1.14121	0.703792	0.294548	0.951764	0.215982	0.312912
NA	NA	NA	2	0	2	FALSE	221	0.145475	0.516548	-0.189289	0.582884	NA	NA	-0.00178208	0.38659
NA	NA	NA	2	0	2	FALSE	73	0.381368	0.736788	-1.25051	1.24173	NA	NA	-0.0435606	0.63364
NA	NA	NA	2	0	2	FALSE	428.667	0.25344	0.326811	-0.0657482	0.408628	0.203687	0.548945	0.14221	0.231433
NA	NA	NA	2	0	2	FALSE	268	0.246139	0.42534	-0.653781	0.477106	-0.326918	0.707344	-0.181638	0.289651
NA	NA	NA	2	0	2	FALSE	258.333	-0.325559	0.372169	0.419662	0.538795	0.401587	0.792089	-0.0215975	0.285618
NA	NA	NA	2	0	2	FALSE	55	0.898293	0.919935	NA	NA	NA	NA	0.898293	0.919935
NA	NA	NA	2	0	2	FALSE	288.667	-0.135736	0.443291	-0.314433	0.448903	0.133107	0.644457	-0.154956	0.283307
NA	NA	NA	2	0	2	FALSE	426.333	-0.0140777	0.333787	-0.317177	0.403447	-0.971487	0.555413	-0.28453	0.233375
NA	NA	NA	2	0	2	FALSE	76	-0.0701216	0.780746	0.0686161	1.08566	NA	NA	-0.0228287	0.633859
NA	NA	NA	2	0	2	FALSE	418	-0.08257	0.300525	-0.0368127	0.433953	-0.523399	0.623445	-0.129584	0.229686
NA	NA	NA	2	0	2	FALSE	309.667	-0.421878	0.368224	-0.616189	0.460512	0.10464	0.730796	-0.416892	0.267614
NA	NA	NA	2	0	2	FALSE	94	-1.23354	0.686776	-0.911449	1.05154	NA	NA	-1.13723	0.575002
NA	NA	NA	2	0	2	FALSE	175	-0.518725	0.540084	-1.39634	0.713905	NA	NA	-0.838175	0.430715
NA	NA	NA	2	0	2	FALSE	549.333	0.0801609	0.299157	-0.723102	0.348098	-0.199241	0.530192	-0.251508	0.208587
NA	NA	NA	2	0	2	FALSE	387	0.10728	0.37537	-1.39919	0.400757	0.109511	0.588317	-0.470874	0.248355
NA	NA	NA	2	0	2	FALSE	171	-0.327368	0.451232	-0.289037	0.690636	0.212732	0.866065	-0.231406	0.346249
NA	NA	NA	2	0	2	FALSE	201	0.0158512	0.430722	-0.22345	0.604154	-0.0778758	0.825413	-0.066792	0.322787
NA	NA	NA	2	0	2	FALSE	294.667	-0.92112	0.34295	-0.0160205	0.531827	-0.594387	0.754129	-0.647527	0.269227
NA	NA	NA	2	0	2	FALSE	358.333	-0.26396	0.321128	-0.137921	0.470529	-0.192562	0.660665	-0.219557	0.246146
NA	NA	NA	2	0	2	FALSE	341	-0.381484	0.337296	0.285202	0.453149	-0.178744	0.715458	-0.148173	0.253078
NA	NA	NA	2	0	2	FALSE	52	-0.30651	0.956229	NA	NA	NA	NA	-0.30651	0.956229
NA	NA	NA	2	0	2	FALSE	636.333	-0.148233	0.250216	0.304204	0.35209	0.153623	0.547613	0.0218656	0.191132
NA	NA	NA	2	0	2	FALSE	361.333	0.183537	0.332204	0.000766402	0.47883	-0.489434	0.580421	0.0130327	0.246999
NA	NA	NA	2	0	2	FALSE	159	-0.347654	0.515693	-0.179155	0.812664	NA	NA	-0.299282	0.435423
NA	NA	NA	2	0	2	FALSE	309	-0.279006	0.352681	-0.332046	0.473245	-0.0687918	0.762817	-0.270257	0.265156
NA	NA	NA	2	0	2	FALSE	70	0.341728	0.931589	-0.647672	1.01571	NA	NA	-0.110308	0.686551
NA	NA	NA	1	0	1	FALSE	50953.3	-0.0767255	0.112519	-0.118971	0.0718043	0.0651959	0.312832	-0.100541	0.0594273
NA	NA	NA	2	0	2	FALSE	113	0.0207568	0.697542	-0.886453	0.836897	NA	NA	-0.351131	0.535826
NA	NA	NA	2	0	2	FALSE	100.333	-0.0626309	0.640534	-0.37333	0.823723	-0.334739	1.05244	-0.208784	0.455773
NA	NA	NA	2	0	2	FALSE	467	0.114859	0.307472	-0.0718091	0.373551	0.464155	0.608945	0.0954974	0.221183
NA	NA	NA	2	0	2	FALSE	170.5	-0.32848	0.585359	-0.192537	0.665407	NA	NA	-0.269173	0.439502
NA	NA	NA	2	0	2	FALSE	64	-1.04907	0.87788	NA	NA	NA	NA	-1.04907	0.87788
NA	NA	NA	2	0	2	FALSE	401.333	-0.250697	0.310409	-0.287696	0.425011	0.0379377	0.669971	-0.226543	0.234776
NA	NA	NA	2	0	2	FALSE	120.333	-0.248639	0.61243	-0.670801	0.711641	-0.556869	1.03682	-0.449738	0.423676
NA	NA	NA	2	0	2	FALSE	253.5	-0.24555	0.438287	-0.67429	0.601657	NA	NA	-0.394189	0.354257
NA	NA	NA	2	0	2	FALSE	62	-0.651771	0.868745	-0.377008	1.21072	NA	NA	-0.558385	0.705837
NA	NA	NA	2	0	2	FALSE	327.333	0.425136	0.358477	-0.282712	0.441947	0.0704611	0.719166	0.134619	0.25963
NA	NA	NA	2	0	2	FALSE	371	-0.214509	0.338482	-0.277605	0.440977	-0.421235	0.609861	-0.267669	0.245741
NA	NA	NA	2	0	2	FALSE	238.5	-0.628303	0.394782	0.0242698	0.771782	NA	NA	-0.492967	0.351469
NA	NA	NA	2	0	2	FALSE	65	NA	NA	-1.7179	1.20306	NA	NA	-1.7179	1.20306
NA	NA	NA	2	0	2	FALSE	458	0.250566	0.327415	-0.359246	0.371028	-0.337721	0.574559	-0.0660138	0.225752
NA	NA	NA	2	0	2	FALSE	554.333	-0.225044	0.283873	-0.215971	0.354047	-0.0393463	0.550803	-0.196143	0.205484
NA	NA	NA	2	0	2	FALSE	248.333	0.197016	0.417103	0.0383967	0.527432	-0.532947	0.694005	0.0143574	0.295929
NA	NA	NA	2	0	2	FALSE	176.333	0.208959	0.445824	0.204367	0.714963	-0.788344	0.772356	0.0149563	0.339738
NA	NA	NA	3	0	3	FALSE	55	NA	NA	-3.7604	1.64558	NA	NA	-3.7604	1.64558
NA	NA	NA	2	0	2	FALSE	701.333	-0.131706	0.258352	-0.520965	0.320698	-0.581577	0.496704	-0.326718	0.186473
NA	NA	NA	2	0	2	FALSE	564.667	0.0748572	0.275247	-0.0905993	0.354575	-0.227798	0.559438	-0.018909	0.202658
NA	NA	NA	2	0	2	FALSE	101	-0.215732	0.598829	-0.76161	1.15252	NA	NA	-0.331774	0.531381
NA	NA	NA	2	0	2	FALSE	324.667	0.0343255	0.361338	-1.02082	0.466729	0.352778	0.654582	-0.24685	0.26186
NA	NA	NA	2	0	2	FALSE	137	-0.761569	0.60059	-0.0970659	0.800139	NA	NA	-0.5221	0.480332
NA	NA	NA	2	0	2	FALSE	596	-0.623914	0.266738	0.0724047	0.349156	-0.115791	0.559949	-0.335774	0.198235
NA	NA	NA	2	0	2	FALSE	651.667	-0.326434	0.25345	-0.126668	0.340905	-0.034724	0.537886	-0.227725	0.190249
NA	NA	NA	2	0	2	FALSE	123	0.21605	0.591668	-0.641405	0.902563	NA	NA	-0.0416749	0.494824
NA	NA	NA	2	0	2	FALSE	51	NA	NA	-1.10391	1.33015	NA	NA	-1.10391	1.33015
NA	NA	NA	2	0	2	FALSE	185	0.296116	0.529975	-0.34766	0.585019	-0.0471554	0.731246	-0.00595473	0.346016
NA	NA	NA	2	0	2	FALSE	213	0.350438	0.523945	-1.52843	0.524198	0.428203	0.73494	-0.382443	0.330891
NA	NA	NA	2	0	2	FALSE	234.333	0.160453	0.378571	1.67447	0.626189	-0.466027	0.721157	0.392454	0.295518
NA	NA	NA	2	0	2	FALSE	238.333	0.100331	0.397437	0.511405	0.524177	0.859497	0.888458	0.319056	0.298311
NA	NA	NA	2	0	2	FALSE	187.333	0.149507	0.45844	-0.194407	0.593159	0.235164	0.894954	0.0511289	0.336168
NA	NA	NA	2	0	2	FALSE	210.333	0.176701	0.425603	-0.453877	0.588049	0.209703	0.799258	-0.000878315	0.316578
NA	NA	NA	2	0	2	FALSE	96	0.333148	0.702472	-1.56332	0.984327	NA	NA	-0.306803	0.571795
NA	NA	NA	2	0	2	FALSE	100	-0.632749	0.830957	-1.32878	0.839705	NA	NA	-0.977122	0.590644
NA	NA	NA	2	0	2	FALSE	317.333	0.0910074	0.403394	-0.177736	0.444812	0.0898525	0.613086	-0.00721402	0.268609
NA	NA	NA	2	0	2	FALSE	149	-0.133254	0.447454	-0.239943	0.845409	-0.222891	0.901981	-0.16729	0.362192
NA	NA	NA	2	0	2	FALSE	175.5	-0.56059	0.600121	-0.0386524	0.639451	NA	NA	-0.316165	0.437593
NA	NA	NA	2	0	2	FALSE	261	-0.47058	0.379163	-0.0940844	0.575812	-0.231383	0.662413	-0.333393	0.285704
NA	NA	NA	2	0	2	FALSE	209.333	-0.40827	0.436233	0.322865	0.573979	-0.216078	0.807671	-0.152358	0.319061
NA	NA	NA	2	0	2	FALSE	50	0.752073	0.964942	NA	NA	NA	NA	0.752073	0.964942
NA	NA	NA	2	0	2	FALSE	264.667	0.113381	0.380224	-0.118859	0.484306	0.510035	0.957571	0.0679442	0.285469
NA	NA	NA	2	0	2	FALSE	236.333	-0.313583	0.410369	-0.29872	0.521898	0.327934	0.865731	-0.230384	0.302285
NA	NA	NA	2	0	2	FALSE	55.5	-0.48793	0.916726	1.06196	1.2639	NA	NA	0.0463581	0.74208
NA	NA	NA	2	0	2	FALSE	93.5	1.33691	0.754743	0.222174	0.910984	NA	NA	0.883188	0.581191
NA	NA	NA	2	0	2	FALSE	350.333	-0.6081	0.338598	-0.326173	0.423941	0.592016	0.831267	-0.398012	0.252108
NA	NA	NA	2	0	2	FALSE	311	0.0239074	0.378099	-0.832715	0.484665	-0.27411	0.615209	-0.295228	0.268276
NA	NA	NA	2	0	2	FALSE	129.333	-0.244486	0.505856	-0.283057	0.782062	-0.14209	1.06954	-0.240364	0.394757
NA	NA	NA	2	0	2	FALSE	210.667	-0.165377	0.446791	-0.394153	0.535621	0.670167	0.915163	-0.144715	0.321261
NA	NA	NA	2	0	2	FALSE	72	NA	NA	-1.66572	1.1407	NA	NA	-1.66572	1.1407
NA	NA	NA	2	0	2	FALSE	161	-0.170126	0.588035	-0.862047	0.702306	NA	NA	-0.455287	0.450862
NA	NA	NA	2	0	2	FALSE	239.667	-0.667955	0.367681	0.0863939	0.560538	0.641306	1.0572	-0.356631	0.295213
NA	NA	NA	2	0	2	FALSE	168.667	-0.837377	0.460216	-0.338076	0.710344	-0.296812	0.834149	-0.620385	0.35049
NA	NA	NA	2	0	2	FALSE	72	-0.819985	0.823113	NA	NA	NA	NA	-0.819985	0.823113
NA	NA	NA	2	0	2	FALSE	274	0.731909	0.397925	-0.642922	0.478815	0.443232	0.750391	0.209195	0.283375
NA	NA	NA	2	0	2	FALSE	261	0.0776106	0.409036	-0.547155	0.509875	-0.0822628	0.696188	-0.152315	0.290048
NA	NA	NA	2	0	2	FALSE	60	NA	NA	-0.940021	1.22196	NA	NA	-0.940021	1.22196
NA	NA	NA	2	0	2	FALSE	144.5	0.352375	0.622612	-0.390372	0.729669	NA	NA	0.0394367	0.473625
NA	NA	NA	2	0	2	FALSE	168	-0.254809	0.428444	-0.0756733	0.74999	-0.197907	0.907146	-0.208886	0.3442
NA	NA	NA	2	0	2	FALSE	66	-0.124189	0.854452	-0.312614	1.14501	NA	NA	-0.191586	0.684797
NA	NA	NA	1	0	1	FALSE	28697	-0.00150317	0.115063	-0.161809	0.0780562	0.179304	0.316282	-0.0996513	0.0632889
NA	NA	NA	2	0	2	FALSE	69	-0.499965	0.86609	-0.724628	1.0961	NA	NA	-0.586318	0.679554
NA	NA	NA	2	0	2	FALSE	62	0.117294	0.942171	-0.77888	1.12002	NA	NA	-0.254073	0.720997
NA	NA	NA	2	0	2	FALSE	271	-0.319683	0.352884	-0.297357	0.530799	0.524022	0.874515	-0.22793	0.278561
NA	NA	NA	2	0	2	FALSE	118.5	-0.848884	0.556815	0.521892	1.06819	NA	NA	-0.555996	0.493759
NA	NA	NA	2	0	2	FALSE	223.333	-0.114683	0.384199	-0.200755	0.607751	0.346752	0.848139	-0.0771152	0.303278
NA	NA	NA	2	0	2	FALSE	108	-0.981828	0.678003	NA	NA	NA	NA	-0.981828	0.678003
NA	NA	NA	2	0	2	FALSE	99.3333	-0.0221672	0.727512	-0.644081	0.760092	-0.498528	1.05367	-0.355176	0.47031
NA	NA	NA	2	0	2	FALSE	148	0.538336	0.594379	0.0714525	0.737403	NA	NA	0.354462	0.462765
NA	NA	NA	2	0	2	FALSE	210.333	0.0511641	0.396483	0.548091	0.628309	0.166079	0.836299	0.189002	0.311222
NA	NA	NA	2	0	2	FALSE	163.5	0.305608	0.575236	-0.477117	0.697884	NA	NA	-0.0110428	0.443884
NA	NA	NA	2	0	2	FALSE	50	NA	NA	-0.386636	1.32615	NA	NA	-0.386636	1.32615
NA	NA	NA	2	0	2	FALSE	245.333	-0.214188	0.412359	0.0329683	0.496771	0.503377	0.869884	-0.040944	0.298081
NA	NA	NA	2	0	2	FALSE	285.333	-0.28931	0.364881	0.116174	0.483342	0.432134	0.83161	-0.0793859	0.274852
NA	NA	NA	2	0	2	FALSE	133.667	0.728465	0.597989	-0.519508	0.661486	-0.0449837	0.966093	0.130284	0.403131
NA	NA	NA	2	0	2	FALSE	128.5	-0.426081	0.58235	-0.365626	0.883108	NA	NA	-0.407759	0.486161
NA	NA	NA	2	0	2	FALSE	376.333	-0.626656	0.33114	0.0785228	0.44093	-0.226903	0.622398	-0.350065	0.243652
NA	NA	NA	2	0	2	FALSE	279.333	0.204898	0.383443	-0.045979	0.483354	0.234401	0.750858	0.125438	0.278906
NA	NA	NA	2	0	2	FALSE	93	NA	NA	-2.0239	1.02199	NA	NA	-2.0239	1.02199
NA	NA	NA	2	0	2	FALSE	190.333	0.279511	0.457906	-0.426094	0.590112	0.112376	0.870989	0.0287517	0.334094
NA	NA	NA	2	0	2	FALSE	80	NA	NA	-1.68019	1.083	NA	NA	-1.68019	1.083
NA	NA	NA	2	0	2	FALSE	312	-0.55057	0.352681	-0.0172881	0.481984	-0.359576	0.709613	-0.36391	0.264165
NA	NA	NA	2	0	2	FALSE	363.667	-0.41655	0.313888	-0.244641	0.457782	-0.345962	0.737287	-0.359861	0.244258
NA	NA	NA	3	0	3	FALSE	59	NA	NA	-3.83103	1.61323	NA	NA	-3.83103	1.61323
NA	NA	NA	2	0	2	FALSE	91	0.167347	0.65549	-1.25982	1.13253	NA	NA	-0.190773	0.567318
NA	NA	NA	2	0	2	FALSE	53	NA	NA	-2.32842	1.38018	NA	NA	-2.32842	1.38018
NA	NA	NA	2	0	2	FALSE	139	-0.637663	0.525244	-0.0250353	0.944631	NA	NA	-0.492987	0.459053
NA	NA	NA	2	0	2	FALSE	461	-0.313797	0.312659	-0.655821	0.380547	0.119478	0.596393	-0.371133	0.223907
NA	NA	NA	2	0	2	FALSE	53	NA	NA	0.565423	1.27821	NA	NA	0.565423	1.27821
NA	NA	NA	2	0	2	FALSE	51	-1.64522	1.0069	NA	NA	NA	NA	-1.64522	1.0069
NA	NA	NA	1	0	1	FALSE	2106	-0.0809271	0.17288	-0.0456794	0.187784	0.14046	0.390778	-0.0451003	0.120943
NA	NA	NA	2	0	2	FALSE	72	-1.05179	0.828546	NA	NA	NA	NA	-1.05179	0.828546
NA	NA	NA	2	0	2	FALSE	77	NA	NA	-1.59892	1.10017	NA	NA	-1.59892	1.10017
NA	NA	NA	2	0	2	FALSE	174.5	-0.724278	0.469278	0.408219	0.851429	NA	NA	-0.460405	0.410986
NA	NA	NA	2	0	2	FALSE	156.5	-0.123708	0.695304	-1.37898	0.656636	NA	NA	-0.787218	0.477397
NA	NA	NA	2	0	2	FALSE	95.6667	0.763604	0.628398	0.426347	0.95133	-0.473583	0.931104	0.387947	0.456874
NA	NA	NA	2	0	2	FALSE	82.5	0.103179	0.81042	-0.00740769	0.969438	NA	NA	0.0576873	0.621775
NA	NA	NA	2	0	2	FALSE	119	0.270935	0.663648	-1.09296	0.834293	NA	NA	-0.257629	0.51937
NA	NA	NA	2	0	2	FALSE	156	-0.124965	0.515406	0.694785	0.823358	NA	NA	0.105821	0.436871
NA	NA	NA	2	0	2	FALSE	111	-0.0223187	0.624884	0.426347	0.936867	NA	NA	0.115826	0.519857
NA	NA	NA	2	0	2	FALSE	106.5	0.0804166	0.653211	-0.950032	0.942848	NA	NA	-0.253774	0.53694
NA	NA	NA	2	0	2	FALSE	168	0.515654	0.468598	0.246486	0.687389	0.210403	0.809699	0.389337	0.349306
NA	NA	NA	2	0	2	FALSE	153	-0.686348	0.54978	-0.682991	0.791855	NA	NA	-0.685256	0.451605
NA	NA	NA	2	0	2	FALSE	105	-0.166364	0.65231	-0.909377	0.961189	NA	NA	-0.40066	0.539751
NA	NA	NA	2	0	2	FALSE	58	NA	NA	-2.70855	1.36437	NA	NA	-2.70855	1.36437
NA	NA	NA	2	0	2	FALSE	129.667	0.576291	0.53952	-1.0652	0.77393	-0.391432	0.919152	-0.0416455	0.398769
NA	NA	NA	2	0	2	FALSE	129.667	-0.213564	0.527092	-0.212748	0.83182	-0.590027	0.856572	-0.293456	0.395052
NA	NA	NA	2	0	2	FALSE	133.333	0.408883	0.526579	0.369351	0.724801	0.0974148	1.00094	0.349551	0.391989
NA	NA	NA	2	0	2	FALSE	105	-0.476607	0.641838	0.995589	0.969323	NA	NA	-0.0278755	0.535154
NA	NA	NA	2	0	2	FALSE	114.5	-0.364358	0.630327	-0.261649	0.906318	NA	NA	-0.330874	0.51748
NA	NA	NA	2	0	2	FALSE	215.333	-0.201966	0.428135	-0.610288	0.582675	0.063083	0.768157	-0.276601	0.314725
NA	NA	NA	2	0	2	FALSE	144.667	-0.154698	0.511638	-0.500652	0.726398	-0.634961	0.889302	-0.335638	0.378513
NA	NA	NA	2	0	2	FALSE	79.5	-0.217201	0.733338	-1.06754	1.13482	NA	NA	-0.467695	0.615926
NA	NA	NA	2	0	2	FALSE	123	-0.105079	0.643547	-0.515042	0.825261	NA	NA	-0.260106	0.507485
NA	NA	NA	2	0	2	FALSE	111.5	-0.218916	0.699655	-1.0386	0.849622	NA	NA	-0.550149	0.540096
NA	NA	NA	2	0	2	FALSE	193.667	-0.299998	0.414816	0.605518	0.655135	0.298778	0.856878	0.00781591	0.324385
NA	NA	NA	2	0	2	FALSE	166.5	-0.0141554	0.516063	-0.242666	0.766019	NA	NA	-0.0854915	0.427997
NA	NA	NA	2	0	2	FALSE	173.333	-0.354357	0.462233	0.626912	0.606712	0.286488	1.08693	0.0348255	0.348294
NA	NA	NA	2	0	2	FALSE	128	0.6961	0.552145	-0.0136462	0.769434	-0.383339	0.887608	0.284313	0.400367
NA	NA	NA	2	0	2	FALSE	70	-0.881965	0.835938	NA	NA	NA	NA	-0.881965	0.835938
NA	NA	NA	2	0	2	FALSE	63	0.729567	0.861179	NA	NA	NA	NA	0.729567	0.861179
NA	NA	NA	2	0	2	FALSE	151	-0.221334	0.550148	0.549929	0.785235	NA	NA	0.032602	0.450568
NA	NA	NA	1	0	1	FALSE	18226.3	-0.0312416	0.117949	-0.156798	0.0865245	0.181995	0.320858	-0.0995595	0.0681728
NA	NA	NA	2	0	2	FALSE	67	-0.864488	0.894082	-0.296934	1.09689	NA	NA	-0.637931	0.693026
NA	NA	NA	2	0	2	FALSE	138	-0.370147	0.535667	0.378046	0.674287	0.967817	1.07528	0.0578003	0.390751
NA	NA	NA	2	0	2	FALSE	51	NA	NA	-0.0932317	1.30893	NA	NA	-0.0932317	1.30893
NA	NA	NA	2	0	2	FALSE	192	-0.152206	0.481973	-0.142532	0.714956	NA	NA	-0.149183	0.399644
NA	NA	NA	2	0	2	FALSE	51	NA	NA	-1.41947	1.34234	NA	NA	-1.41947	1.34234
NA	NA	NA	2	0	2	FALSE	100.5	-0.898991	0.61138	0.638939	1.12844	NA	NA	-0.549992	0.537553
NA	NA	NA	2	0	2	FALSE	147	-0.441595	0.58645	0.569749	0.756396	NA	NA	-0.0618977	0.463466
NA	NA	NA	2	0	2	FALSE	173.333	-0.124011	0.431419	0.103192	0.74886	0.486383	0.812612	0.0293287	0.33961
NA	NA	NA	2	0	2	FALSE	70	-0.508452	0.894191	-1.31699	1.06893	NA	NA	-0.841319	0.685856
NA	NA	NA	2	0	2	FALSE	170	-0.163673	0.449335	0.265717	0.692898	-0.125436	0.871918	-0.0505553	0.346041
NA	NA	NA	2	0	2	FALSE	199.333	-0.555141	0.424774	-0.550757	0.578902	0.658658	1.07594	-0.442087	0.326338
NA	NA	NA	2	0	2	FALSE	118.5	-0.408701	0.858104	-1.61044	0.737863	NA	NA	-1.0996	0.559471
NA	NA	NA	2	0	2	FALSE	126.5	-0.247996	0.661652	-1.18885	0.79764	NA	NA	-0.631501	0.509251
NA	NA	NA	2	0	2	FALSE	225.333	-0.527561	0.388119	0.156299	0.641411	-0.167374	0.736567	-0.314396	0.302719
NA	NA	NA	2	0	2	FALSE	218.667	-0.273755	0.4338	-1.00153	0.527879	0.161929	0.971978	-0.48965	0.316844
NA	NA	NA	2	0	2	FALSE	123.667	-0.178879	0.563466	-0.945673	0.868868	-0.820439	0.807846	-0.511643	0.408024
NA	NA	NA	2	0	2	FALSE	145.667	-0.286614	0.486143	0.181567	0.717163	-0.051164	1.01711	-0.127296	0.374182
NA	NA	NA	2	0	2	FALSE	183.667	0.144955	0.482536	-1.13968	0.603831	-0.0426924	0.833039	-0.302497	0.343433
NA	NA	NA	2	0	2	FALSE	65	0.0816633	0.852381	NA	NA	NA	NA	0.0816633	0.852381
NA	NA	NA	2	0	2	FALSE	69	0.375142	0.85007	0.0484836	1.09322	NA	NA	0.252055	0.671068
NA	NA	NA	2	0	2	FALSE	270.333	-0.04692	0.375497	-0.22016	0.495899	0.133965	0.840448	-0.0825783	0.282004
NA	NA	NA	2	0	2	FALSE	161	-0.0803461	0.47215	-0.259159	0.656146	0.375239	1.02346	-0.0778206	0.358904
NA	NA	NA	2	0	2	FALSE	147.667	-0.150669	0.544774	-0.258406	0.657732	-0.5032	0.908943	-0.248723	0.38093
NA	NA	NA	2	0	2	FALSE	258.333	-0.278339	0.428588	-0.73153	0.50072	-0.295117	0.691028	-0.438202	0.294542
NA	NA	NA	2	0	2	FALSE	201	-1.28164	0.514924	-0.654244	0.65645	NA	NA	-1.04265	0.405152
[truncated: 668 more rows]

## Sheet: ALL 
Pos	WT_AA	Mut	Pos2	Mut2	Pos1	Mut1	WT_AA1	WT_AA2	Nham_nt	Nham_aa	Nmut_codons	STOP	mean_count	nscore1	sigma1	nscore2	sigma2	nscore3	sigma3	nscore	sigma
[truncated: 18,647 more rows]
