# Supplementary figures and images for: The genetic landscape for amyloid beta fibril nucleation accurately discriminates familial Alzheimer’s disease mutations
Source: eLife journal article supplement (doi:10.7554/elife.63364), 2021-02-01

Figure 1-figure supplement 1

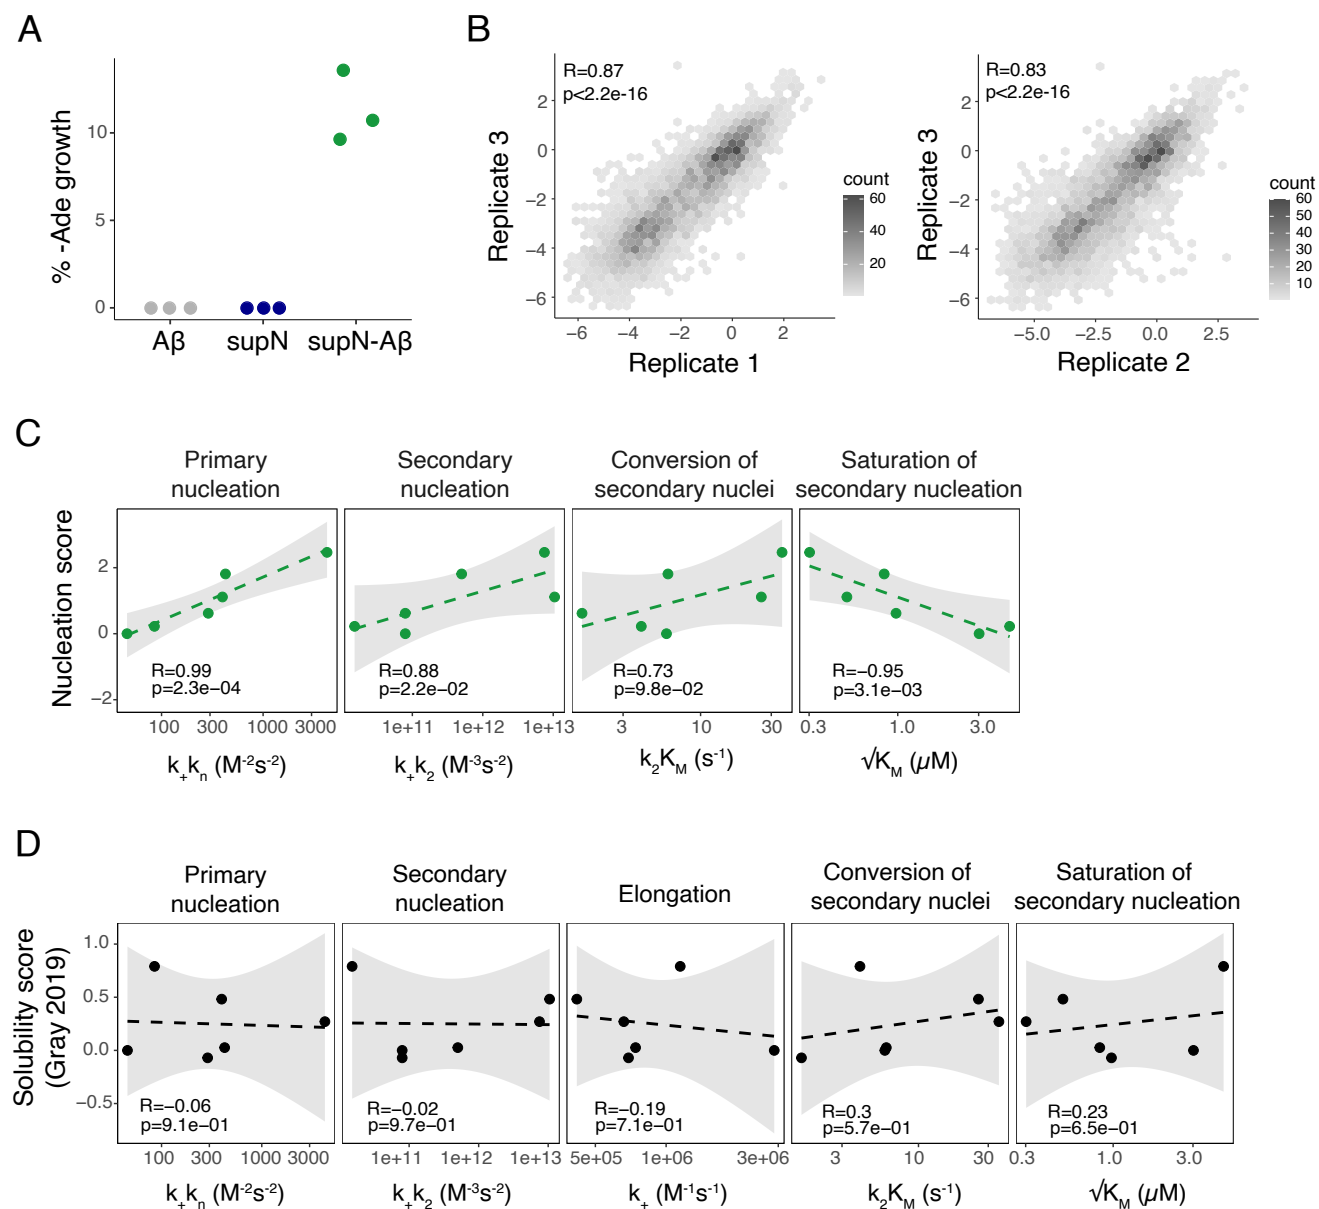

Supplement: supp [file elife-63364-supp-v1.zip › elife_poa_e63364_Figure_1_figure_supplement_1.pdf]

Figure 2-figure supplement 1

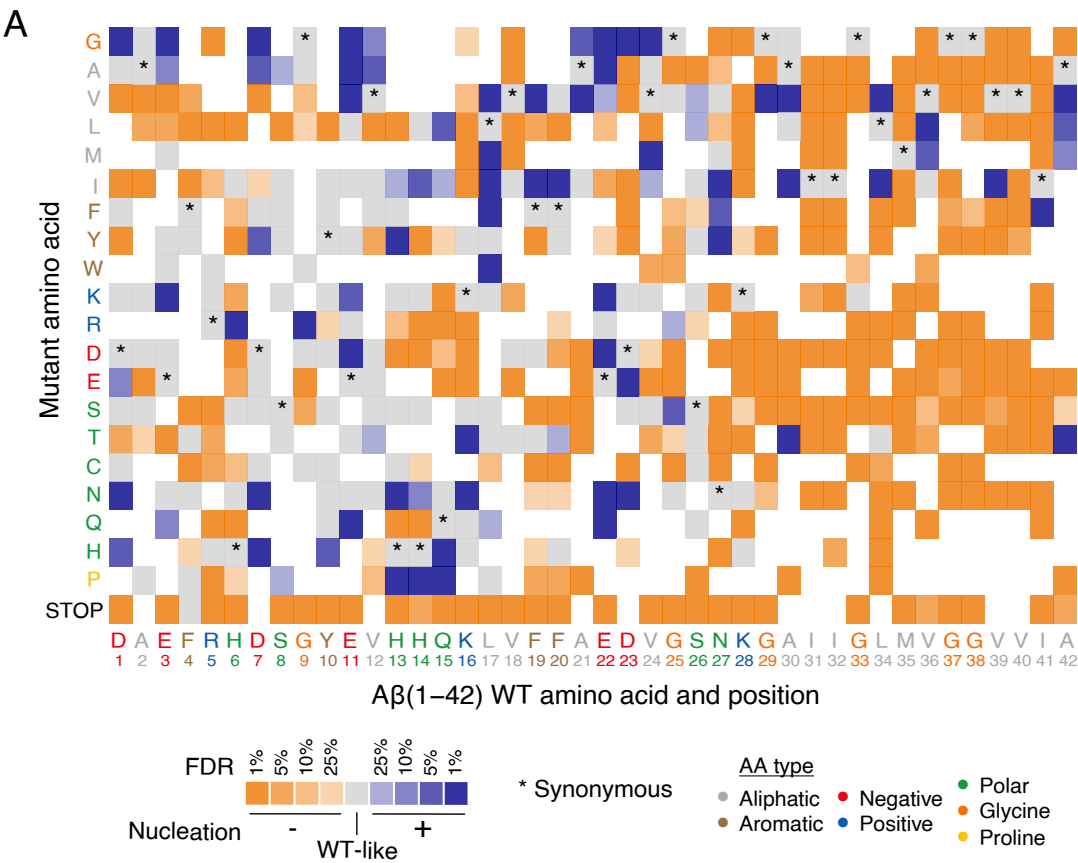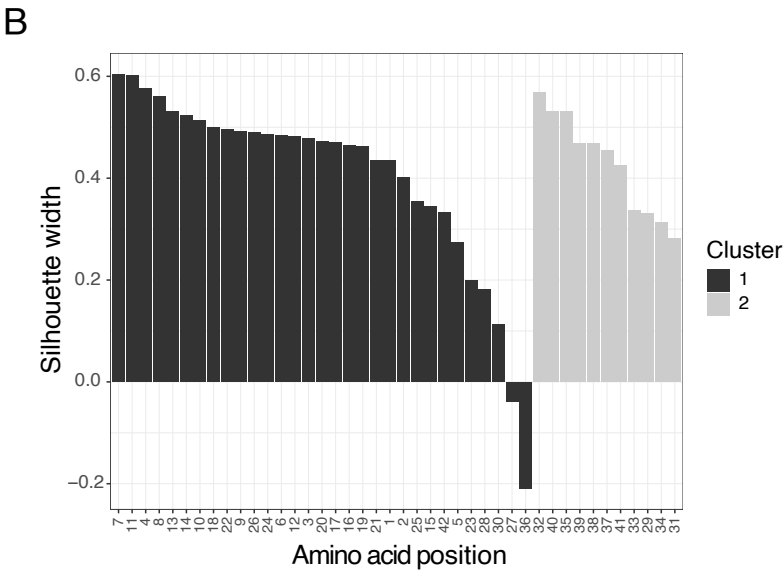

Supplement: supp [file elife-63364-supp-v1.zip › elife_poa_e63364_Figure_2_figure_supplement_1.pdf]

Figure 3-figure supplement 1

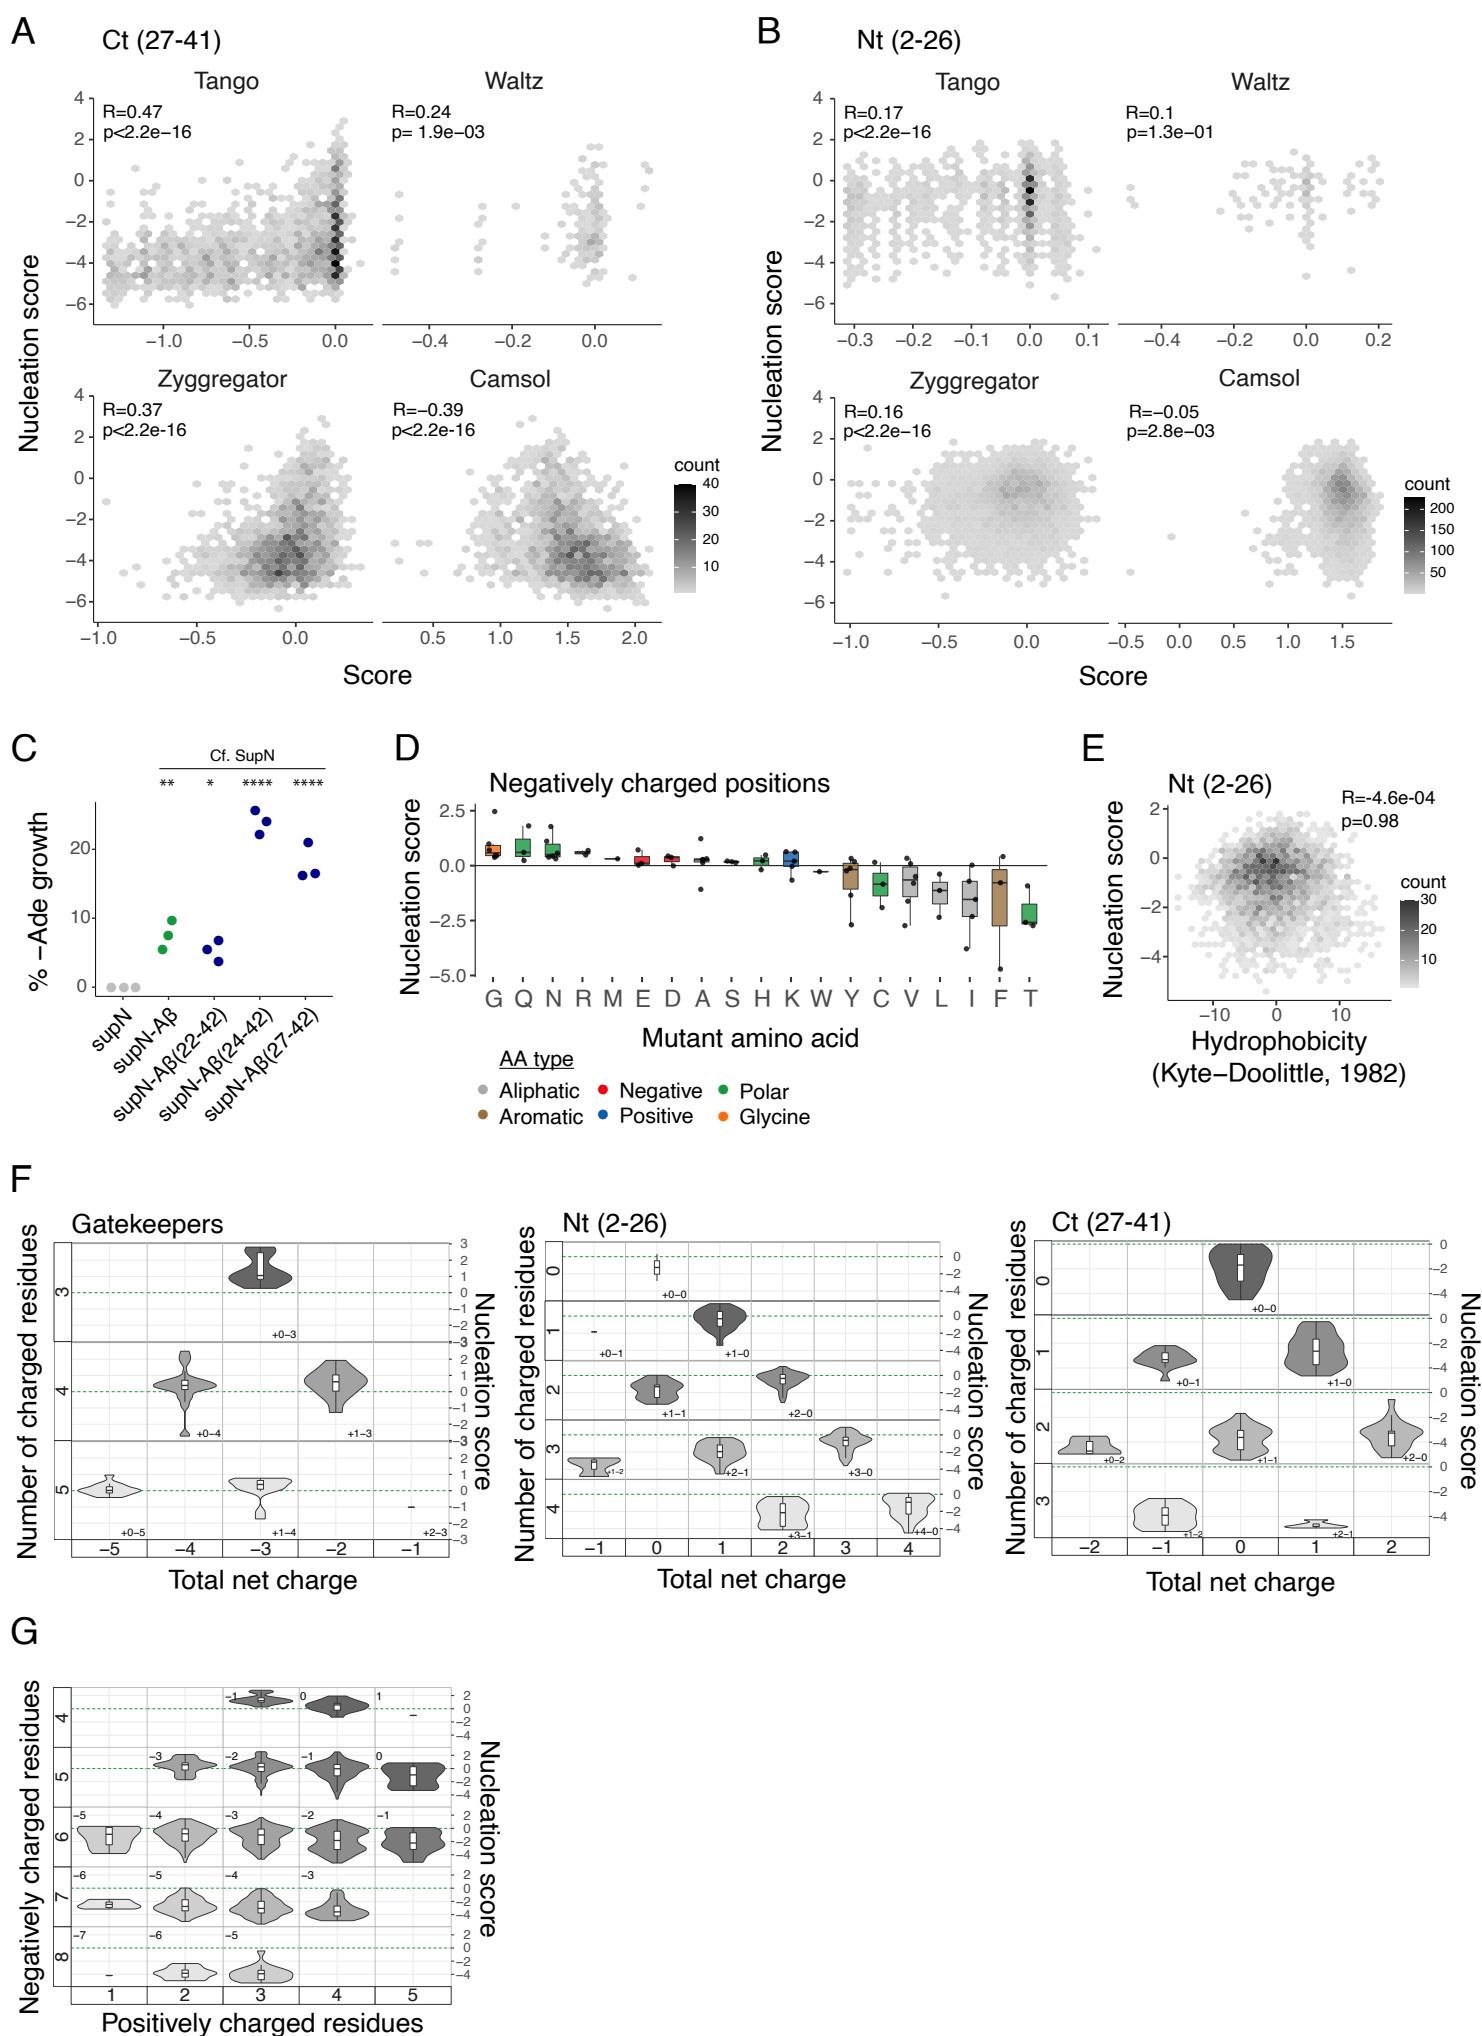

Supplement: supp [file elife-63364-supp-v1.zip › elife_poa_e63364_Figure_3_figure_supplement_1.pdf]

Figure 3-figure supplement 2

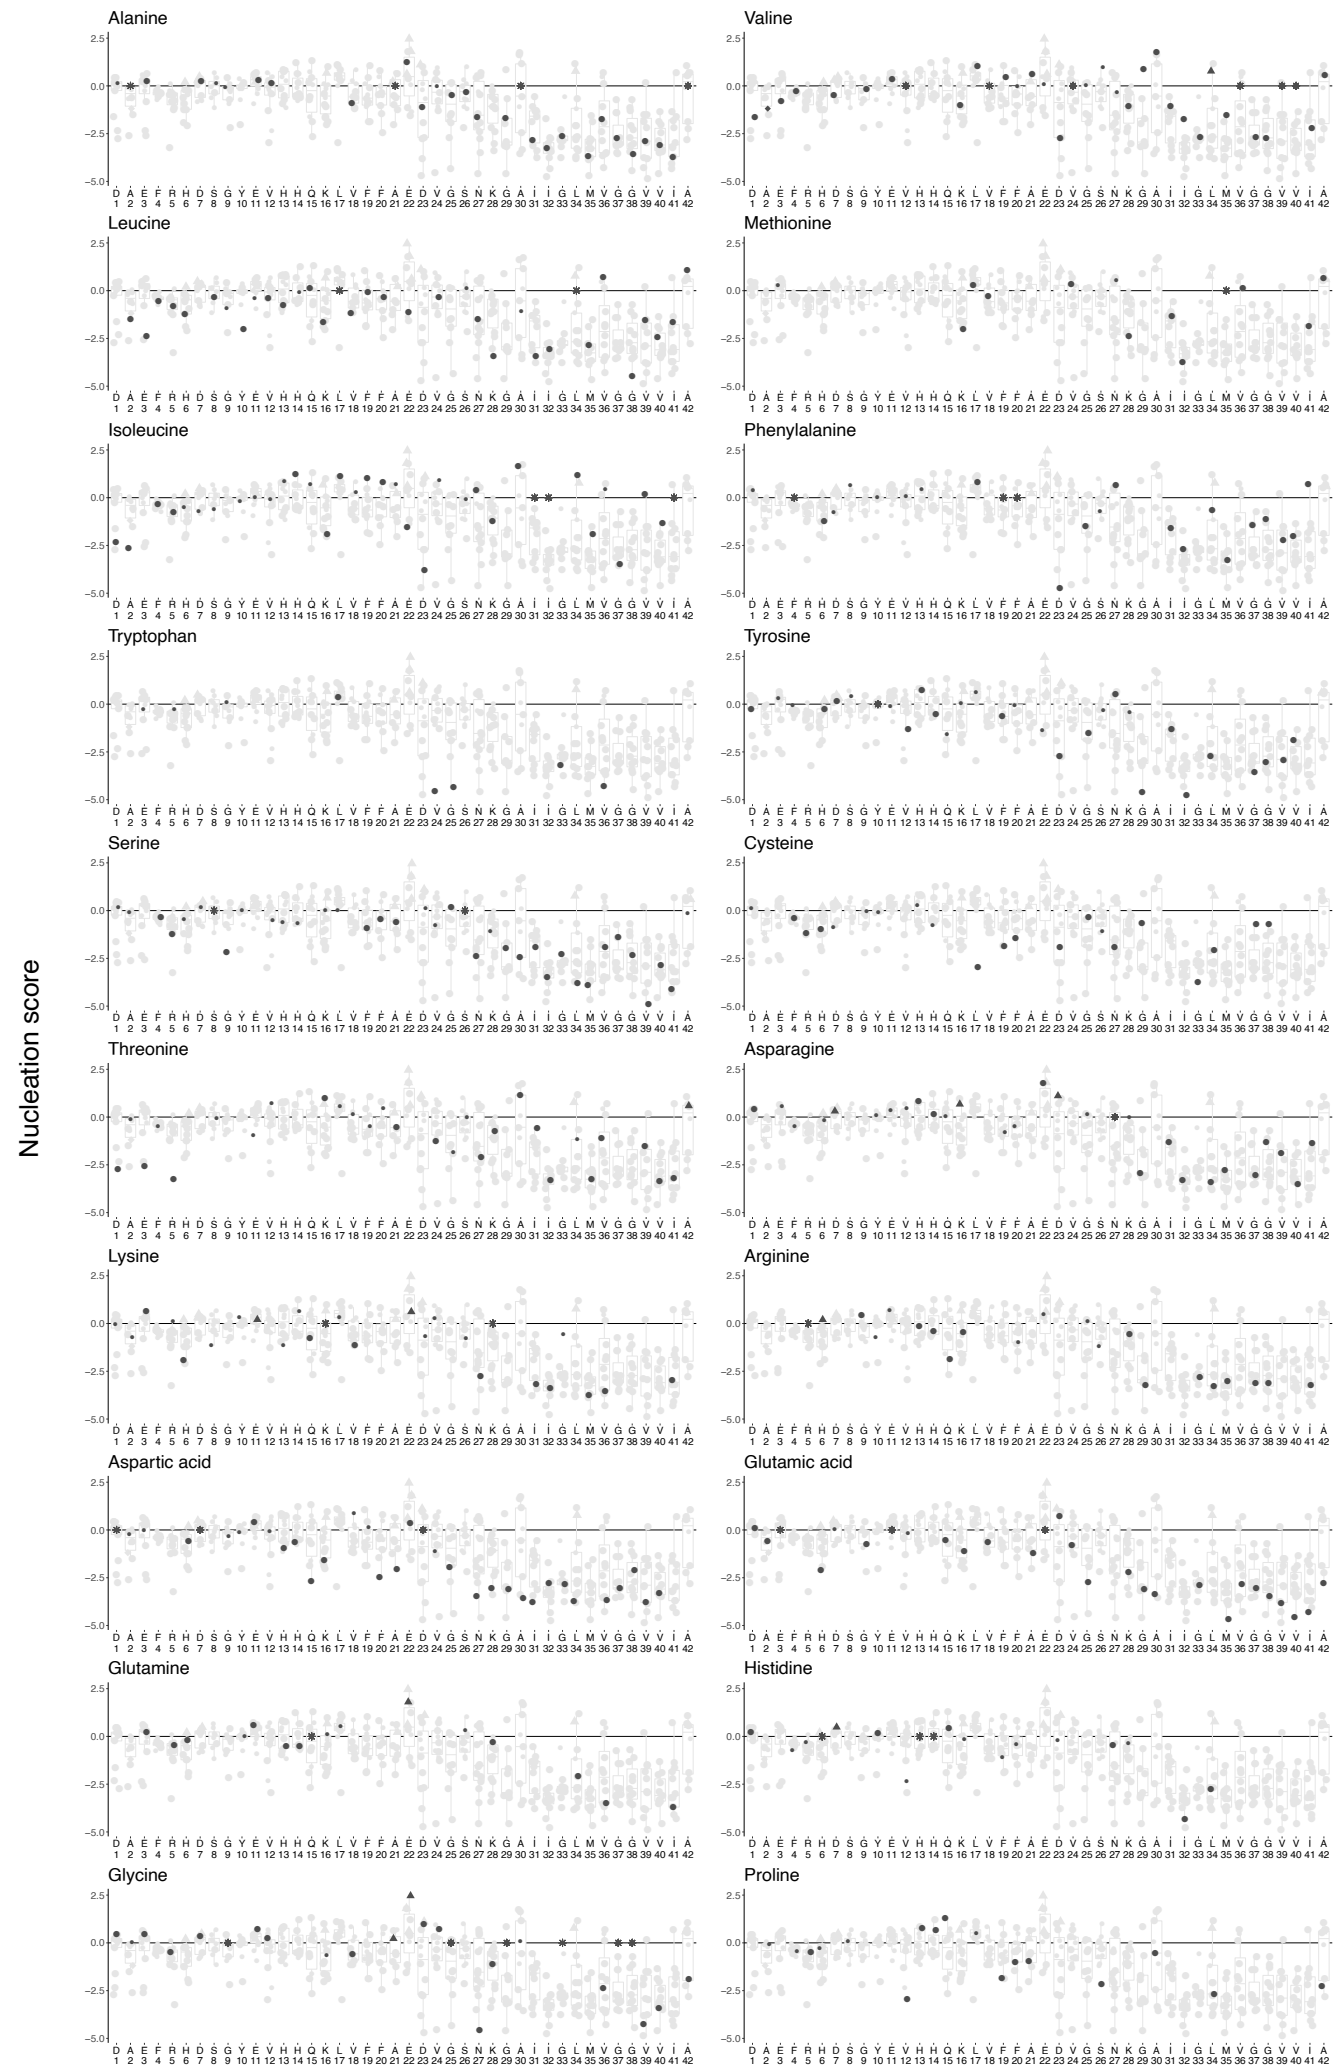

Aβ(1-42) WT amino acid and position

Supplement: supp [file elife-63364-supp-v1.zip › elife_poa_e63364_Figure_3_figure_supplement_2.pdf]

Figure 4-figure supplement 1

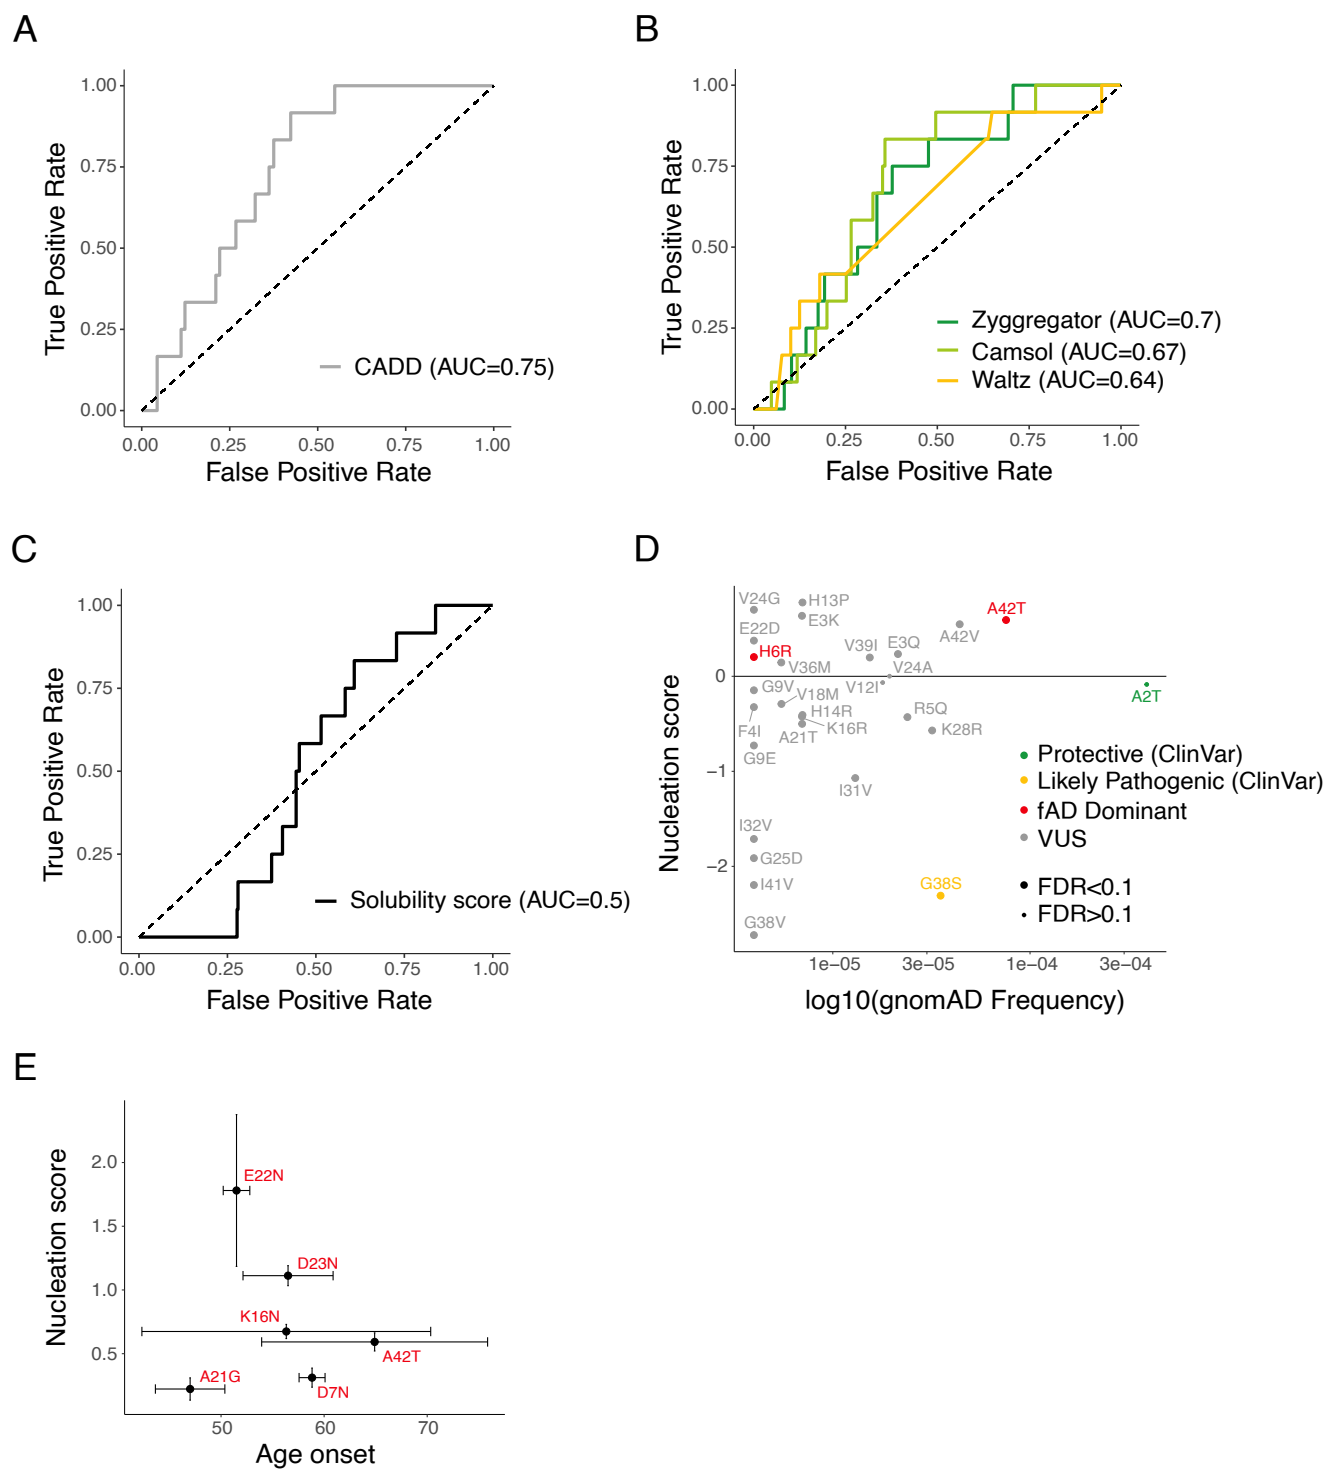

Supplement: supp [file elife-63364-supp-v1.zip › elife_poa_e63364_Figure_4_figure_supplement_1.pdf]

Figure 5-figure supplement 1

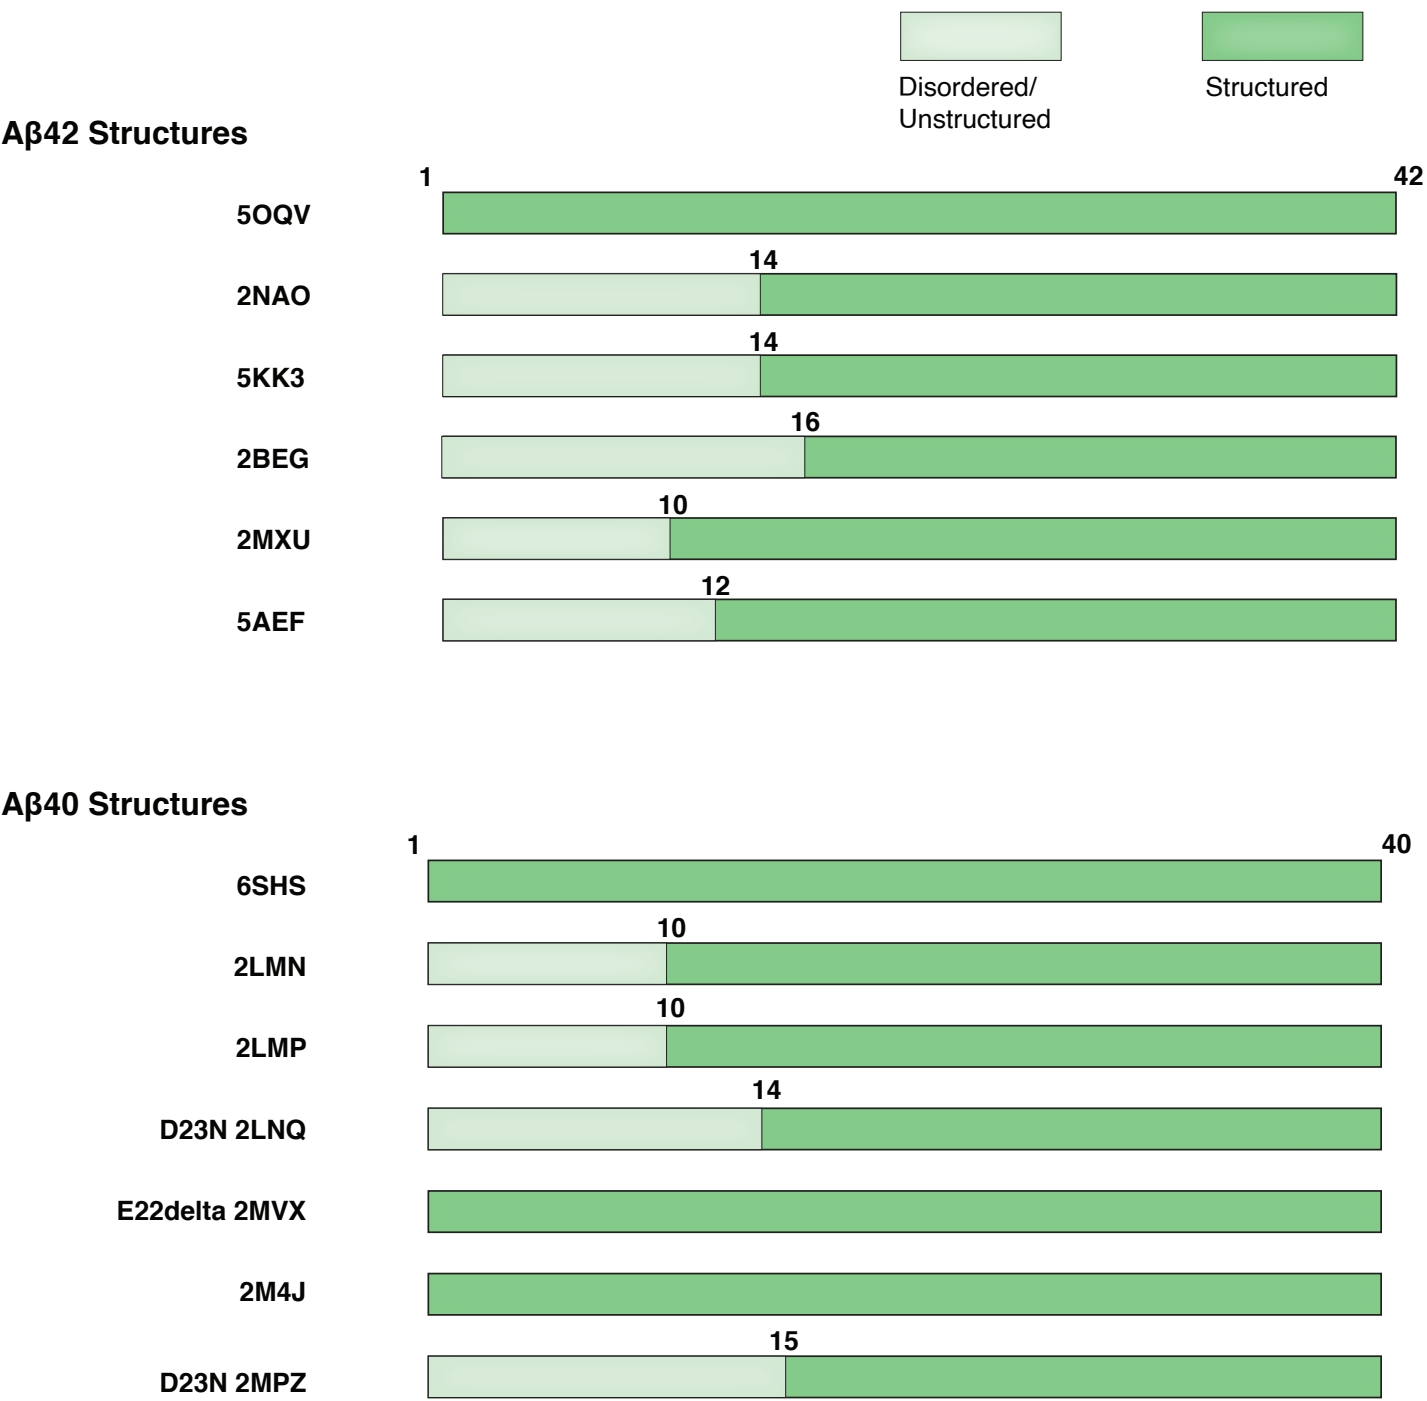

Supplement: supp [file elife-63364-supp-v1.zip › elife_poa_e63364_Figure_5_figure_supplement_1.pdf]

Figure 5-figure supplement 2

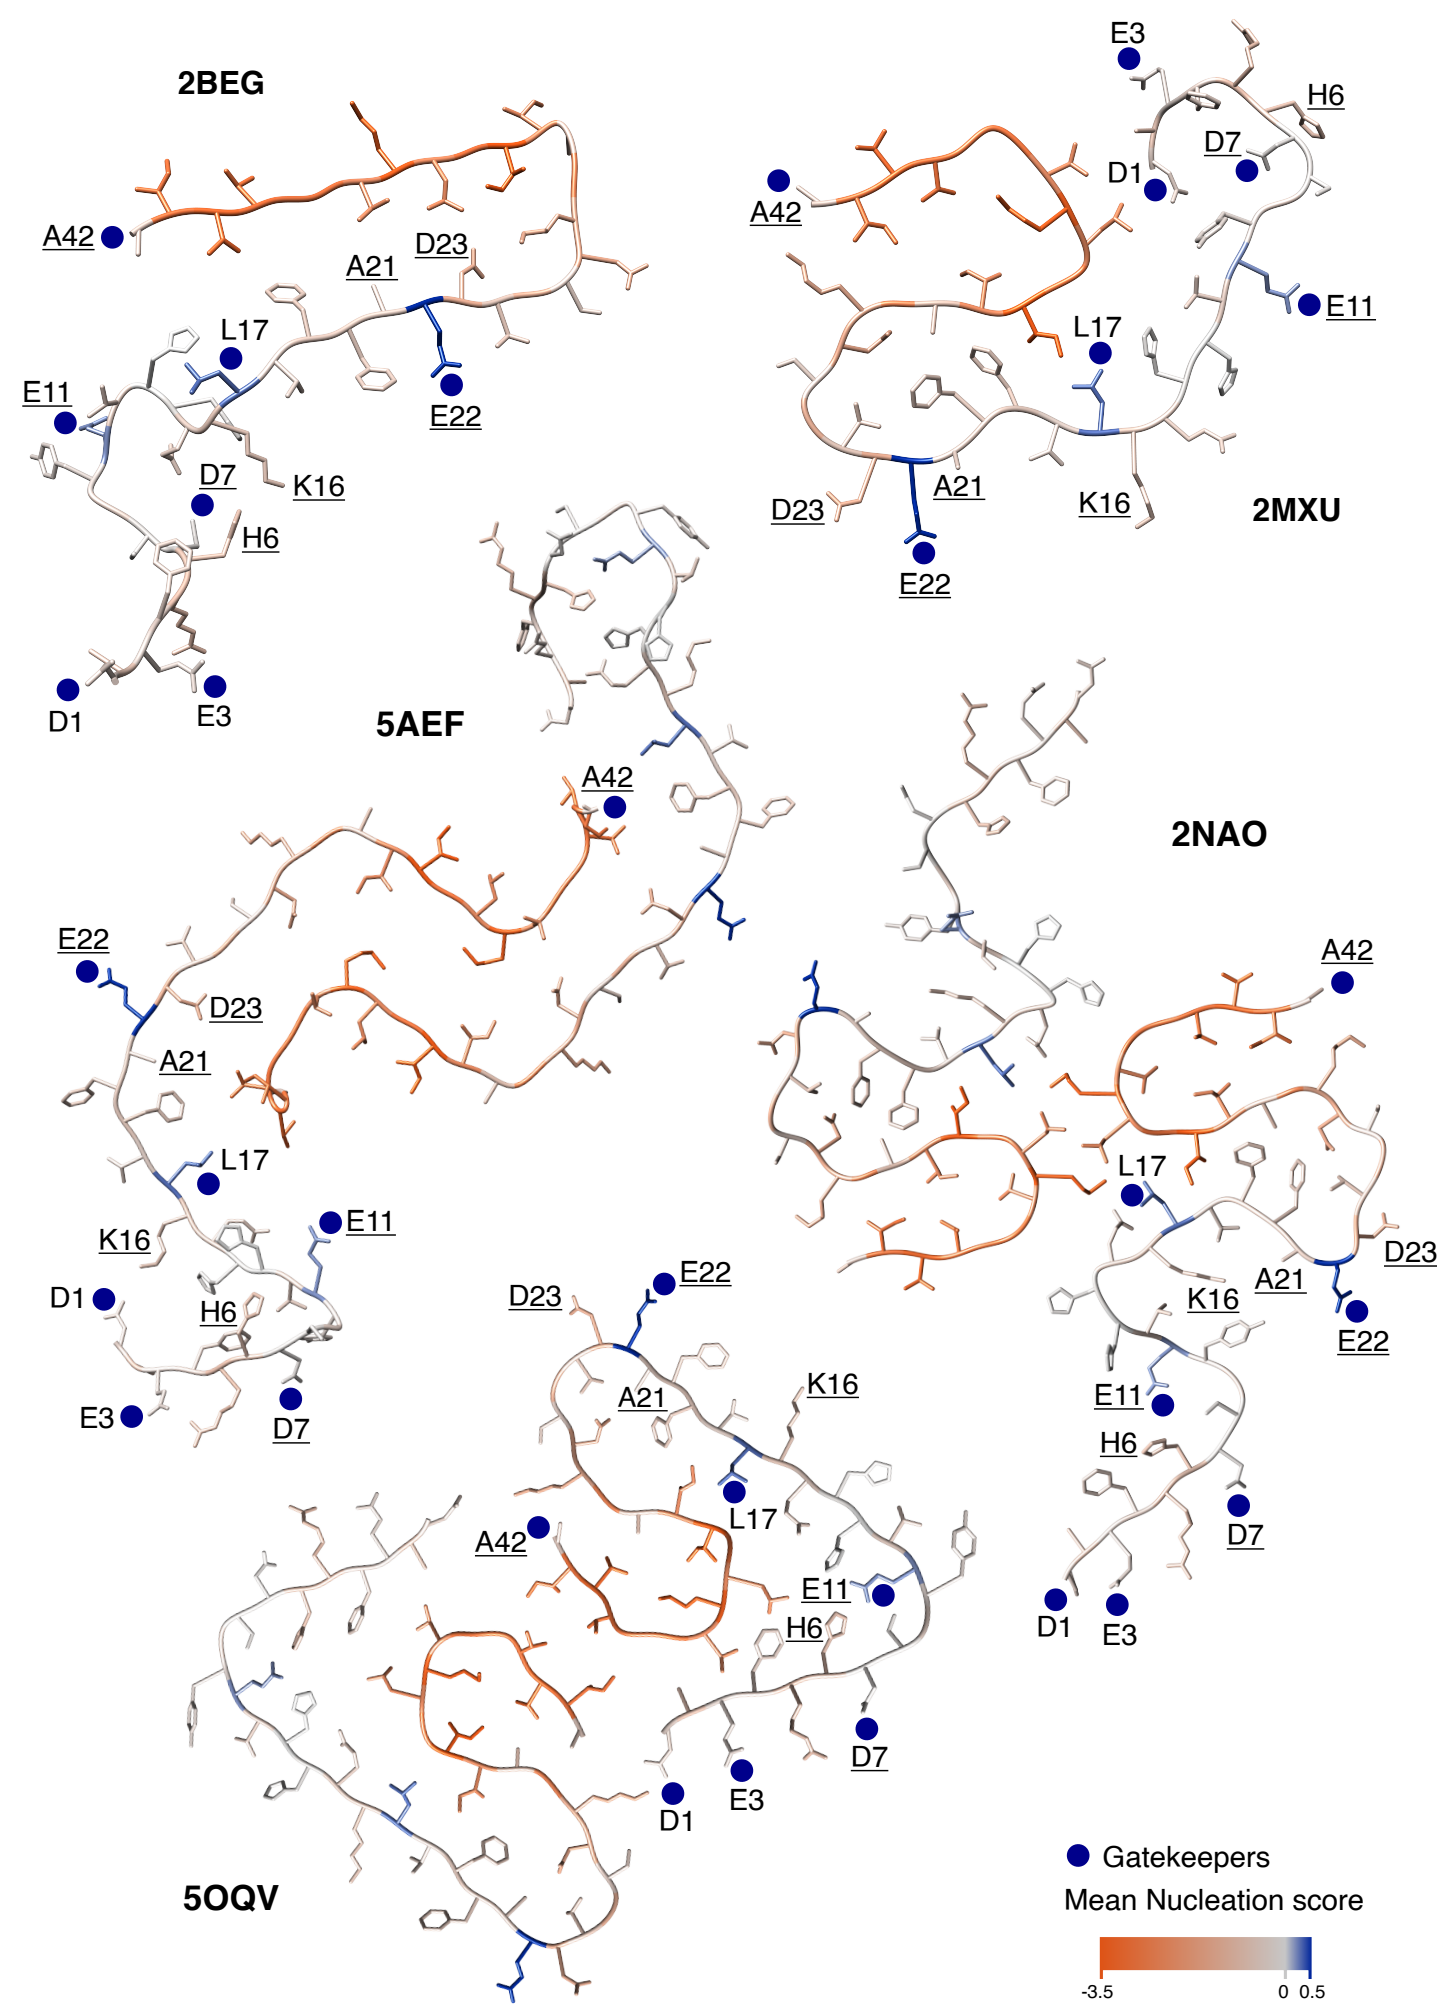

Supplement: supp [file elife-63364-supp-v1.zip › elife_poa_e63364_Figure_5_figure_supplement_2.pdf]
